# Supplementary material
Source: publisher figshare collection journal article supplement (https://gsajournals.figshare.com/ndownloader/files/14393717)
Supplement: Supplementary file 1 [file 14393717]

qseqid	sseqid	pident	length	mismatch	gapopen	qstart	qend	qlen	sstart	send	slen	evalue	bitscore	chr1	chr2	chr.match	gene.start	gene.stop	block	gene.start	gene.stop	block	homlink.qseqid	homlink.sseqid	PidentBit	q.cov	s.cov
CIGENEomyV6.10492	CIGENEomyV6.71962	95.64	13621	551	9	1	13620	14047	6423	20001	20339	0	26610	3	22	3-22	63909437	63964529	3q_22q	31816727	31906155	3q_22q	3q_22q	3q_22q	2544980.4	0.97	0.67
CIGENEomyV6.2638	CIGENEomyV6.73141	94.45	4902	177	17	1	4823	4960	1	4886	4919	0	8930	1	23	1-23	65568347	65724104	1q_23	10098017	10246278	1q_23	1q_23	1q_23	843438.5	0.98	0.99
CIGENEomyV6.4970	CIGENEomyV6.9558	96.59	4547	145	2	894	5430	5430	44	4590	4590	0	8666	2	3	2-3	25618162	25761962	2p_3p	35649306	35740617	2p_3p	2p_3p	2p_3p	837048.94	0.84	0.99
CIGENEomyV6.65328	CIGENEomyV6.79061	93.9	4689	235	17	36	4690	4690	495	5166	5166	0	8628	19	25	19-25	35575063	35704221	19q_25q	62634796	62725468	19q_25q	19q_25q	19q_25q	810169.2	1	0.9
CIGENEomyV6.75402	CIGENEomyV6.82758	96.64	3715	125	0	882	4596	4596	1	3715	3715	0	7488	24	27	24-27	20679657	20718595	24_27	23916720	23956446	24_27	24_27	24_27	723640.32	0.81	1
CIGENEomyV6.67869	CIGENEomyV6.73687	91.88	4088	291	3	1	4047	4047	1	4088	4088	0	7541	20	23	20-23	30993935	31187414	20q_23	27528385	27724442	20q_23	20q_23	20q_23	692867.08	1.01	1
CIGENEomyV6.50996	CIGENEomyV6.76700	93.94	3298	191	2	1	3289	4417	1	3298	3309	0	6222	14	25	14-25	76115863	76186917	14q_25p	6219857	6264858	14q_25p	14q_25p	14q_25p	584494.68	0.75	1
CIGENEomyV6.4167	CIGENEomyV6.8734	93.52	3166	192	8	1	3160	3160	944	4102	4102	0	5981	2	3	2-3	8600771	8644299	2p_3p	18330597	18448237	2p_3p	2p_3p	2p_3p	559343.12	1	0.77
CIGENEomyV6.12871	CIGENEomyV6.18224	95.07	3105	117	11	74	3169	3169	25	3102	3102	0	5764	4	5	4-5	24638943	24728606	4p_5q	69872668	69994790	4p_5q	4p_5q	4p_5q	547983.48	0.98	1
CIGENEomyV6.23376	CIGENEomyV6.61521	99.5	2596	13	0	1	2596	2596	1	2596	2596	0	5397	7	18	7-18	6906445	6952260	7p_18p	10233506	10268023	7p_18p	7p_18p	7p_18p	537001.5	1	1
CIGENEomyV6.4049	CIGENEomyV6.8639	97.84	2865	53	4	18	2880	2880	18	2875	2875	0	5485	2	3	2-3	7124499	7161799	2p_3p	16841150	16894854	2p_3p	2p_3p	2p_3p	536652.4	0.99	1
CIGENEomyV6.20543	CIGENEomyV6.38473	94.02	3042	138	8	1	3024	3024	1424	4439	4439	0	5638	6	11	6-11	26134603	26178026	6p_11q	55276786	55353810	6p_11q	6p_11q	6p_11q	530084.76	1	0.68
CIGENEomyV6.2901	CIGENEomyV6.73417	90.65	3282	232	17	1	3244	3703	731	3975	4086	0	5762	1	23	1-23	73122574	73285190	1q_23	18081411	18281837	1q_23	1q_23	1q_23	522325.3	0.88	0.8
CIGENEomyV6.4357	CIGENEomyV6.8779	98.53	2852	35	4	1	2849	2849	1	2848	2848	0	5226	2	3	2-3	12332066	12375976	2p_3p	19561450	19613823	2p_3p	2p_3p	2p_3p	514917.78	1	1
CIGENEomyV6.48767	CIGENEomyV6.62669	81.38	4290	591	31	1	4169	4169	1	4203	4203	0	6315	14	18	14-18	24591105	24824587	14p_18q	37031281	37174282	14p_18q	14p_18q	14p_18q	513914.7	1.02	1.01
CIGENEomyV6.50296	CIGENEomyV6.77984	92.76	2734	191	2	1	2727	2727	1	2734	2734	0	5270	14	25	14-25	59523057	59689792	14q_25p	33002777	33182127	14q_25p	14q_25p	14q_25p	488845.2	1	1
CIGENEomyV6.32813	CIGENEomyV6.55543	82.2	4303	548	47	1	4233	4240	1	4155	5170	0	5940	9	16	9-16	58420229	58452467	9q_16q	37509058	37555502	9q_16q	9q_16q	9q_16q	488268	1	0.82
CIGENEomyV6.75149	CIGENEomyV6.82518	99.91	2339	2	0	1	2339	2339	1	2339	2339	0	4885	24	27	24-27	15309484	15334340	24_27	18377107	18402868	24_27	24_27	24_27	488060.35	1	1
CIGENEomyV6.15826	CIGENEomyV6.85732	97.59	2488	44	1	1	2488	2488	23	2494	2494	0	4945	5	29	5-29	11718274	11775024	5p_29	337455	396868	5p_29	5p_29	5p_29	482582.55	1	1
CIGENEomyV6.53442	CIGENEomyV6.69029	93.26	2982	147	5	1	2929	3031	1	2981	3038	0	5155	15	21	15-21	54935883	54971783	15q_21p	13050483	13074509	15q_21p	15q_21p	15q_21p	480755.3	0.98	0.98
CIGENEomyV6.1766	CIGENEomyV6.6579	98.23	2426	32	4	1	2417	2417	1	2424	2424	0	4835	1	2	1-2	41312783	41331390	1p_2q	70709942	70746240	1p_2q	1p_2q	1p_2q	474942.05	1	1
CIGENEomyV6.28925	CIGENEomyV6.84575	84.52	3683	391	45	12	3585	3585	1124	4736	4736	0	5615	8	28	8-28	62865883	62941338	8q_28	17317087	17457166	8q_28	8q_28	8q_28	474579.8	1.01	0.77
CIGENEomyV6.65130	CIGENEomyV6.79287	96.49	2592	67	6	1	2572	2572	1	2588	2588	0	4869	19	25	19-25	30012641	30044058	19q_25q	68602089	68639785	19q_25q	19q_25q	19q_25q	469809.81	1.01	1
CIGENEomyV6.1236	CIGENEomyV6.6051	95.33	2546	119	0	1	2546	2548	1	2546	2548	0	4803	1	2	1-2	27845721	28001485	1p_2q	57324107	57461899	1p_2q	1p_2q	1p_2q	457869.99	1	1
CIGENEomyV6.21709	CIGENEomyV6.80522	96.26	2568	74	6	1	2554	2554	1	2560	2560	0	4755	6	26	6-26	57819203	57896725	6q_26	12734885	12815663	6q_26	6q_26	6q_26	457716.3	1	1
CIGENEomyV6.36854	CIGENEomyV6.51951	82.42	3657	475	40	1	3577	3577	731	4299	4299	0	5491	11	15	11-15	10604052	10671834	11p_15p	13947165	14075195	11p_15p	11p_15p	11p_15p	452568.22	1.01	0.84
CIGENEomyV6.13869	CIGENEomyV6.27104	94.37	2523	141	1	1	2523	3629	852	3373	4530	0	4780	4	8	4-8	55725200	55758617	4q_8p	13842024	13897453	4q_8p	4q_8p	4q_8p	451088.6	0.69	0.56
CIGENEomyV6.16851	CIGENEomyV6.40586	91.63	2735	154	13	1	2715	2715	1	2680	2680	0	4887	5	12	5-12	35822637	35873799	5p_12p	16039178	16101099	5p_12p	5p_12p	5p_12p	447795.81	1	1.02
CIGENEomyV6.21902	CIGENEomyV6.80707	97.64	2623	55	4	21	2639	2639	1260	3879	3879	0	4584	6	26	6-26	62242027	62291157	6q_26	17341914	17459278	6q_26	6q_26	6q_26	447581.76	0.99	0.68
CIGENEomyV6.42515	CIGENEomyV6.45822	99.05	2207	21	0	1	2207	2207	2	2208	2208	0	4502	12	13	12-13	68782859	68811679	12q_13q	35958571	35984873	12q_13q	12q_13q	12q_13q	445923.1	1	1
CIGENEomyV6.21728	CIGENEomyV6.80538	95.93	2700	90	7	1	2680	2680	200	2899	2899	0	4582	6	26	6-26	58318128	58356770	6q_26	13100778	13242734	6q_26	6q_26	6q_26	439551.26	1	0.93
CIGENEomyV6.20423	CIGENEomyV6.38352	99.35	2138	14	0	1	2138	2138	1	2138	2138	0	4421	6	11	6-11	23100677	23120780	6p_11q	52103791	52129869	6p_11q	6p_11q	6p_11q	439226.35	1	1
CIGENEomyV6.34823	CIGENEomyV6.40788	94.63	2404	66	6	265	2606	2606	20	2422	2422	0	4622	10	12	10-12	35563942	35629414	10p_12p	21595332	21762613	10p_12p	10p_12p	10p_12p	437379.86	0.92	0.99
CIGENEomyV6.5006	CIGENEomyV6.9592	94.75	2495	102	6	1	2482	2482	1	2479	2479	0	4607	2	3	2-3	26786296	26831094	2p_3p	36751069	36794372	2p_3p	2p_3p	2p_3p	436513.25	1	1
CIGENEomyV6.2970	CIGENEomyV6.73490	96.22	2300	87	0	62	2361	2361	54	2353	2353	0	4497	1	23	1-23	75225773	75462145	1q_23	20886156	21009706	1q_23	1q_23	1q_23	432701.34	0.97	0.98
CIGENEomyV6.20359	CIGENEomyV6.38297	88.12	3013	276	23	1	2970	2970	1	2974	2974	0	4910	6	11	6-11	21256686	21345081	6p_11q	50231706	50261608	6p_11q	6p_11q	6p_11q	432669.2	1.01	1.01
CIGENEomyV6.43053	CIGENEomyV6.46405	98.3	2241	37	1	1	2240	2240	1	2241	2241	0	4380	12	13	12-13	79035781	79050325	12q_13q	45599419	45614198	12q_13q	12q_13q	12q_13q	430554	1	1
CIGENEomyV6.2533	CIGENEomyV6.73050	91.57	2586	196	8	67	2631	2631	1	2585	2585	0	4699	1	23	1-23	63159279	63226403	1q_23	7668098	7707960	1q_23	1q_23	1q_23	430287.43	0.98	1
CIGENEomyV6.17058	CIGENEomyV6.40343	91.19	2805	221	15	1	2789	2789	1	2795	2795	0	4710	5	12	5-12	40011764	40067595	5p_12p	11658206	11709908	5p_12p	5p_12p	5p_12p	429504.9	1	1
CIGENEomyV6.42649	CIGENEomyV6.46069	96.48	2557	78	3	1	2548	2548	1	2554	2554	0	4439	12	13	12-13	71423765	71450570	12q_13q	40142219	40169314	12q_13q	12q_13q	12q_13q	428274.72	1	1
CIGENEomyV6.37722	CIGENEomyV6.52311	95.42	2251	89	2	1	2251	2258	1	2237	2258	0	4460	11	15	11-15	35007205	35077674	11p_15p	23260903	23312955	11p_15p	11p_15p	11p_15p	425573.2	1	1
CIGENEomyV6.14127	CIGENEomyV6.27369	94.79	2264	80	3	1	2227	2227	1	2263	2263	0	4458	4	8	4-8	62649687	62677205	4q_8p	20906262	20952051	4q_8p	4q_8p	4q_8p	422573.82	1.02	1
CIGENEomyV6.50155	CIGENEomyV6.77860	95.46	2245	102	0	31	2275	2276	55	2299	2309	0	4405	14	25	14-25	55968112	56004417	14q_25p	28745716	28803094	14q_25p	14q_25p	14q_25p	420501.3	0.99	0.97
CIGENEomyV6.34764	CIGENEomyV6.40867	96.03	2166	85	1	549	2714	2714	4	2168	2168	0	4350	10	12	10-12	33395601	33592155	10p_12p	23637709	23734913	10p_12p	10p_12p	10p_12p	417730.5	0.8	1
CIGENEomyV6.14026	CIGENEomyV6.27289	90.18	2514	229	9	1	2500	2500	1	2510	2510	0	4607	4	8	4-8	60558994	60603302	4q_8p	18831874	18866583	4q_8p	4q_8p	4q_8p	415459.26	1	1
CIGENEomyV6.23866	CIGENEomyV6.61905	89.22	2662	247	9	1	2641	2641	27	2669	2669	0	4597	7	18	7-18	16134004	16191417	7p_18p	18139583	18162791	7p_18p	7p_18p	7p_18p	410144.34	1	0.99
CIGENEomyV6.11183	CIGENEomyV6.71120	96.8	2091	67	0	12	2102	2147	82	2172	2190	0	4200	3	22	3-22	76366296	76409554	3q_22p	8954791	9036265	3q_22p	3q_22p	3q_22p	406560	0.97	0.95
CIGENEomyV6.17555	CIGENEomyV6.583	90.93	2524	199	7	1	2518	2519	1	2500	2502	0	4443	5	1	1-5	53587737	53629899	1p_5q	11986837	12031399	1p_5q	1p_5q	1p_5q	404001.99	1	1.01
CIGENEomyV6.32216	CIGENEomyV6.56104	80.17	3374	555	37	10	3328	3328	227	3541	3541	0	5020	9	16	9-16	45480483	45523463	9q_16q	48903397	48954321	9q_16q	9q_16q	9q_16q	402453.4	1	0.94
CIGENEomyV6.49057	CIGENEomyV6.62375	94.43	2246	84	3	2210	4452	4452	579	2786	2786	0	4201	14	18	14-18	30345130	30467000	14p_18q	31460649	31538489	14p_18q	14p_18q	14p_18q	396700.43	0.5	0.81
CIGENEomyV6.42847	CIGENEomyV6.46143	99.54	1962	9	0	1	1962	1962	1	1962	1962	0	3962	12	13	12-13	74447230	74506462	12q_13q	41371848	41425475	12q_13q	12q_13q	12q_13q	394377.48	1	1
CIGENEomyV6.75385	CIGENEomyV6.82743	97.69	2036	41	2	1	2036	2036	1	2030	2030	0	4036	24	27	24-27	20272131	20403880	24_27	23536147	23669197	24_27	24_27	24_27	394276.84	1	1
CIGENEomyV6.20195	CIGENEomyV6.38152	91.96	2350	112	4	66	2363	2363	199	2523	2523	0	4287	6	11	6-11	18117438	18168971	6p_11q	47171551	47228655	6p_11q	6p_11q	6p_11q	394232.52	0.99	0.93
CIGENEomyV6.31800	CIGENEomyV6.56203	88.72	2926	290	15	1	2903	3216	796	3704	4341	0	4435	9	16	9-16	34235723	34251911	9q_16q	50799202	50980645	9q_16q	9q_16q	9q_16q	393473.2	0.91	0.67
CIGENEomyV6.10045	CIGENEomyV6.71366	84.13	2835	354	21	1	2762	3482	1	2812	3458	0	4655	3	22	3-22	51782231	51804277	3q_22p	15546804	15579320	3q_22p	3q_22p	3q_22p	391625.15	0.81	0.81
CIGENEomyV6.4404	CIGENEomyV6.8955	99.54	1972	9	0	395	2366	2366	1	1972	1972	0	3929	2	3	2-3	13609875	13751280	2p_3p	23432081	23498825	2p_3p	2p_3p	2p_3p	391092.66	0.83	1
CIGENEomyV6.42888	CIGENEomyV6.46208	97.69	2031	47	0	1	2031	2031	1	2031	2031	0	4001	12	13	12-13	75436442	75449996	12q_13q	42362337	42376648	12q_13q	12q_13q	12q_13q	390857.69	1	1
CIGENEomyV6.32605	CIGENEomyV6.55730	88.66	2372	236	6	1	2343	2345	491	2858	3052	0	4331	9	16	9-16	54330230	54396505	9q_16q	40766209	40965722	9q_16q	9q_16q	9q_16q	383986.46	1.01	0.78
CIGENEomyV6.25806	CIGENEomyV6.58812	81.06	2825	507	11	1	2810	2812	1	2812	2819	0	4728	7	17	7-17	68282387	68392091	7q_17q	27911421	27962990	7q_17q	7q_17q	7q_17q	383251.68	1	1
CIGENEomyV6.74946	CIGENEomyV6.82322	97.48	2062	49	2	1	2062	2062	1	2059	2059	0	3927	24	27	24-27	10727723	10782393	24_27	13691352	13738949	24_27	24_27	24_27	382803.96	1	1
CIGENEomyV6.4114	CIGENEomyV6.8691	90.87	2378	177	11	1	2348	2348	1	2368	2368	0	4212	2	3	2-3	8069078	8089941	2p_3p	17756404	17807018	2p_3p	2p_3p	2p_3p	382744.44	1.01	1
CIGENEomyV6.23589	CIGENEomyV6.61668	90.97	2568	144	9	1655	4214	4216	1	2488	2490	0	4186	7	18	7-18	10419944	10456512	7p_18p	12543995	12563190	7p_18p	7p_18p	7p_18p	380800.42	0.61	1.03
CIGENEomyV6.50184	CIGENEomyV6.77885	95.09	2018	99	0	1	2018	2492	114	2131	2151	0	4004	14	25	14-25	56691030	56733298	14q_25p	29446497	29486842	14q_25p	14q_25p	14q_25p	380740.36	0.81	0.94
CIGENEomyV6.3862	CIGENEomyV6.8416	95.41	2156	83	5	782	2929	2929	16	2163	2163	0	3976	2	3	2-3	4882139	4905326	2p_3p	13836874	13847023	2p_3p	2p_3p	2p_3p	379350.16	0.73	0.99
CIGENEomyV6.10647	CIGENEomyV6.71848	83.35	2744	399	20	1	2699	3207	1	2731	3375	0	4510	3	22	3-22	66851838	66873784	3q_22q	28632760	28942114	3q_22q	3q_22q	3q_22q	375908.5	0.85	0.81
CIGENEomyV6.36679	CIGENEomyV6.52116	97.52	1938	48	0	1	1938	1938	1	1938	1938	0	3829	11	15	11-15	6405654	6470404	11p_15p	17562220	17696170	11p_15p	11p_15p	11p_15p	373404.08	1	1
CIGENEomyV6.65446	CIGENEomyV6.78973	89.98	2285	128	7	1	2199	2199	323	2592	2592	0	4101	19	25	19-25	37618499	37648347	19q_25q	60634154	60679523	19q_25q	19q_25q	19q_25q	369007.98	1.04	0.88
CIGENEomyV6.44705	CIGENEomyV6.57978	99.57	1878	8	0	1	1878	1981	11	1888	1888	0	3697	13	17	13-17	11987096	12028651	13p_17p	8675224	8713323	13p_17p	13p_17p	13p_17p	368110.29	0.95	0.99
CIGENEomyV6.75374	CIGENEomyV6.82732	93.82	2121	122	4	1	2119	2119	1	2114	2114	0	3915	24	27	24-27	20068950	20101264	24_27	23370579	23402096	24_27	24_27	24_27	367305.3	1	1
CIGENEomyV6.37141	CIGENEomyV6.51652	90.63	2487	206	14	131	2604	2604	2	2474	2474	0	3969	11	15	11-15	15747667	15797079	11p_15p	9445608	9458577	11p_15p	11p_15p	11p_15p	359710.47	0.95	1
CIGENEomyV6.24566	CIGENEomyV6.60092	98.15	1785	33	0	1	1785	1785	1	1785	2785	0	3662	7	17	7-17	38038310	38114204	7q_17q	59495152	59648263	7q_17q	7q_17q	7q_17q	359425.3	1	0.64
CIGENEomyV6.14078	CIGENEomyV6.27331	89.27	2377	230	7	1	2353	2353	1	2376	2376	0	4002	4	8	4-8	61725972	61805531	4q_8p	19977994	20077329	4q_8p	4q_8p	4q_8p	357258.54	1.01	1
CIGENEomyV6.45067	CIGENEomyV6.58307	94.7	1982	105	0	1	1982	1982	1	1982	1982	0	3731	13	17	13-17	19567225	19804753	13p_17p	15447045	15461220	13p_17p	13p_17p	13p_17p	353325.7	1	1
CIGENEomyV6.24770	CIGENEomyV6.59872	94.62	1878	94	2	1	1878	1909	1	1871	1895	0	3707	7	17	7-17	44803132	44859647	7q_17q	52631098	52697847	7q_17q	7q_17q	7q_17q	350756.34	0.98	0.99
CIGENEomyV6.31123	CIGENEomyV6.70286	97.07	1775	52	0	138	1912	1912	1	1775	1775	0	3607	9	21	9-21	14934938	15525133	9p_21q	38889018	39490898	9p_21q	9p_21q	9p_21q	350131.49	0.93	1
CIGENEomyV6.34573	CIGENEomyV6.41117	90.92	2049	174	6	1	2041	2565	1	2045	2068	0	3848	10	12	10-12	28954605	28974717	10p_12p	28273552	28315928	10p_12p	10p_12p	10p_12p	349860.16	0.8	0.99
CIGENEomyV6.13095	CIGENEomyV6.18505	84.1	2604	383	6	1	2583	2601	194	2787	2805	0	4143	4	5	4-5	32308981	32330754	4p_5q	77125296	77164662	4p_5q	4p_5q	4p_5q	348426.3	1	0.93
CIGENEomyV6.75122	CIGENEomyV6.82490	96.21	1847	68	1	53	1897	1897	1	1847	1847	0	3620	24	27	24-27	14306155	14382327	24_27	17340982	17389196	24_27	24_27	24_27	348280.2	0.97	1
CIGENEomyV6.25675	CIGENEomyV6.58935	94.56	1892	101	1	1	1892	1892	1	1890	1890	0	3680	7	17	7-17	65486453	65828843	7q_17q	31274786	31518104	7q_17q	7q_17q	7q_17q	347980.8	1	1
CIGENEomyV6.5071	CIGENEomyV6.9727	93.29	2353	123	11	1	2335	2335	1	2336	2336	0	3728	2	3	2-3	28272646	28325605	2p_3p	39779954	39822465	2p_3p	2p_3p	2p_3p	347785.12	1	1
CIGENEomyV6.20404	CIGENEomyV6.38328	89.64	2124	204	4	1294	3416	3419	44	2152	2862	0	3829	6	11	6-11	22212657	22260805	6p_11q	51253161	51280814	6p_11q	6p_11q	6p_11q	343231.56	0.62	0.74
CIGENEomyV6.75410	CIGENEomyV6.82763	99.17	1687	7	1	1	1680	1680	1	1687	1687	0	3457	24	27	24-27	20761722	20816252	24_27	23970975	23998364	24_27	24_27	24_27	342830.69	1	1
CIGENEomyV6.48456	CIGENEomyV6.63529	81.81	2765	391	26	13	2693	2693	19	2755	2755	0	4190	14	18	14-18	17334462	17422630	14p_18q	56569807	56621700	14p_18q	14p_18q	14p_18q	342783.9	1.02	0.99
CIGENEomyV6.29076	CIGENEomyV6.84431	81.73	2682	402	18	327	2977	2977	4	2628	2628	0	4194	8	28	8-28	67237465	67335212	8q_28	12732888	12778845	8q_28	8q_28	8q_28	342775.62	0.89	1.01
CIGENEomyV6.10082	CIGENEomyV6.71332	94.44	1854	95	4	1	1852	1852	2	1849	1849	0	3615	3	22	3-22	52222290	52267815	3q_22p	15003212	15048377	3q_22p	3q_22p	3q_22p	341400.6	1	1
CIGENEomyV6.67651	CIGENEomyV6.74300	90.49	2072	161	7	1	2048	2048	1	2060	2060	0	3769	20	23	20-23	25043593	25082447	20q_23	43782702	43809870	20q_23	20q_23	20q_23	341056.81	1.01	1
CIGENEomyV6.23041	CIGENEomyV6.61158	95.27	1967	76	6	536	2500	3274	4	1955	1968	0	3571	7	18	7-18	1307230	1339349	7p_18p	3708604	3756341	7p_18p	7p_18p	7p_18p	340209.17	0.6	1
CIGENEomyV6.66002	CIGENEomyV6.78401	84.02	2397	351	17	1	2373	2378	1	2389	2393	0	4048	19	25	19-25	50791406	50804213	19q_25q	47416807	47442315	19q_25q	19q_25q	19q_25q	340112.96	1	0.99
CIGENEomyV6.24811	CIGENEomyV6.59829	94.13	2061	103	4	1	2054	2054	1	2050	2050	0	3579	7	17	7-17	46349277	46387473	7q_17q	51172123	51227973	7q_17q	7q_17q	7q_17q	336891.27	1	1
CIGENEomyV6.20056	CIGENEomyV6.37993	89.27	2097	175	7	1	2054	2054	844	2933	3265	0	3739	6	11	6-11	15335714	15376919	6p_11q	44231621	44293157	6p_11q	6p_11q	6p_11q	333780.53	1.02	0.64
CIGENEomyV6.13832	CIGENEomyV6.27053	90.33	2090	192	3	1886	3967	3967	3	2090	2090	0	3688	4	8	4-8	54520694	54610853	4q_8p	12667152	12718510	4q_8p	4q_8p	4q_8p	333137.04	0.53	1
CIGENEomyV6.25140	CIGENEomyV6.59472	96.89	1734	54	0	407	2140	2140	1	1734	1734	0	3427	7	17	7-17	53759550	53879555	7q_17q	43961912	44038245	7q_17q	7q_17q	7q_17q	332042.03	0.81	1
CIGENEomyV6.10328	CIGENEomyV6.72134	91.81	1978	132	10	8	1983	1983	111	2060	2060	0	3601	3	22	3-22	59112489	59149280	3q_22q	37014656	37054191	3q_22q	3q_22q	3q_22q	330607.81	0.99	0.96
CIGENEomyV6.42987	CIGENEomyV6.46322	94.91	1866	58	10	1	1835	1835	1	1860	1860	0	3479	12	13	12-13	78070659	78091001	12q_13q	44549504	44578373	12q_13q	12q_13q	12q_13q	330191.89	1.01	1
CIGENEomyV6.20739	CIGENEomyV6.38685	97.19	1675	47	0	1	1675	1675	1	1675	1675	0	3386	6	11	6-11	30120185	30163882	6p_11q	59140381	59196576	6p_11q	6p_11q	6p_11q	329085.34	1	1
CIGENEomyV6.42883	CIGENEomyV6.46202	88.9	2234	105	11	1	2169	2169	1	2156	2281	0	3650	12	13	12-13	75316313	75334702	12q_13q	42259342	42278458	12q_13q	12q_13q	12q_13q	324485	1.02	0.97
CIGENEomyV6.42575	CIGENEomyV6.45874	97.91	1677	35	0	175	1851	1851	1	1677	1677	0	3305	12	13	12-13	69842522	69898070	12q_13q	37045217	37081433	12q_13q	12q_13q	12q_13q	323592.55	0.91	1
CIGENEomyV6.3116	CIGENEomyV6.73588	92.03	1971	140	6	1	1956	1959	1	1969	2074	0	3507	1	23	1-23	78940529	79023331	1q_23	24346620	24411001	1q_23	1q_23	1q_23	322749.21	1	0.95
CIGENEomyV6.34686	CIGENEomyV6.40967	94.08	1975	64	6	12	1976	1976	12	1943	1943	0	3390	10	12	10-12	31683104	31751515	10p_12p	25472686	25492477	10p_12p	10p_12p	10p_12p	318931.2	1	1.01
CIGENEomyV6.21535	CIGENEomyV6.80315	96.47	1700	47	4	1	1689	1689	1	1698	1698	0	3303	6	26	6-26	51929143	52022163	6q_26	6845699	6929634	6q_26	6q_26	6q_26	318640.41	1	1
CIGENEomyV6.34600	CIGENEomyV6.41072	93.73	1801	73	3	1	1761	1893	1	1801	2034	0	3398	10	12	10-12	29736045	29912893	10p_12p	27219209	27359954	10p_12p	10p_12p	10p_12p	318494.54	0.95	0.88
CIGENEomyV6.75398	CIGENEomyV6.82753	86.62	2264	229	24	1	2221	2221	1	2233	2233	0	3672	24	27	24-27	20575803	20590563	24_27	23802072	23820526	24_27	24_27	24_27	318068.64	1.01	1
CIGENEomyV6.24941	CIGENEomyV6.59686	94.44	1744	92	2	1	1742	1742	1	1741	3038	0	3347	7	17	7-17	49729922	49796081	7q_17q	48222714	48306329	7q_17q	7q_17q	7q_17q	316090.68	1	0.57
CIGENEomyV6.22301	CIGENEomyV6.81091	97.01	1739	33	4	1	1732	3084	1	1727	1728	0	3258	6	26	6-26	71597069	71730314	6q_26	26509538	26615685	6q_26	6q_26	6q_26	316058.58	0.56	1
CIGENEomyV6.31059	CIGENEomyV6.70224	91.67	2054	136	8	104	2135	2135	1	2041	2041	0	3445	9	21	9-21	13390407	13448982	9p_21q	37221131	37256042	9p_21q	9p_21q	9p_21q	315803.15	0.96	1
CIGENEomyV6.31199	CIGENEomyV6.70360	89.06	1992	163	14	1	1985	1985	1	1944	1944	0	3543	9	21	9-21	18010020	18086200	9p_21q	41874209	41933442	9p_21q	9p_21q	9p_21q	315539.58	1	1.02
CIGENEomyV6.34508	CIGENEomyV6.41209	83.33	2501	239	20	15	2431	2431	67	2473	2473	0	3766	10	12	10-12	26153558	26264758	10p_12p	30833156	30956133	10p_12p	10p_12p	10p_12p	313820.78	1.02	1
CIGENEomyV6.12713	CIGENEomyV6.18060	80.87	2609	418	33	1	2567	2567	430	2999	2999	0	3880	4	5	4-5	20216986	20265864	4p_5q	65662750	65700913	4p_5q	4p_5q	4p_5q	313775.6	1	0.86
CIGENEomyV6.52838	CIGENEomyV6.69642	94.75	1771	79	6	1	1767	1767	29	1789	1789	0	3306	15	21	15-21	41528235	41601099	15q_21p	26195668	26273433	15q_21p	15q_21p	15q_21p	313243.5	1	0.99
CIGENEomyV6.23812	CIGENEomyV6.61836	92.2	1769	124	2	4	1758	1758	1	1769	1769	0	3383	7	18	7-18	14925813	14959594	7p_18p	16797120	16845583	7p_18p	7p_18p	7p_18p	311912.6	1.01	1
CIGENEomyV6.16561	CIGENEomyV6.86554	87.66	2293	229	22	1	2273	2273	1	2259	2259	0	3552	5	29	5-29	29309779	29351154	5p_29	22429459	22486050	5p_29	5p_29	5p_29	311368.32	1	1.01
CIGENEomyV6.19620	CIGENEomyV6.39367	95.26	1729	74	4	1	1729	1729	218	1938	1938	0	3255	6	11	6-11	4409928	4425151	6p_11q	74478563	74503371	6p_11q	6p_11q	6p_11q	310071.3	1	0.89
CIGENEomyV6.1867	CIGENEomyV6.6659	90.73	1790	159	4	19	1808	1808	1	1783	1783	0	3395	1	2	1-2	43739165	43777507	1p_2q	72839371	72875862	1p_2q	1p_2q	1p_2q	308028.35	0.99	1
CIGENEomyV6.35706	CIGENEomyV6.64606	94.62	1673	90	0	1	1673	1673	224	1896	1932	0	3248	10	19	10-19	55929287	56004380	10q_19p	15498139	15529986	10q_19p	10q_19p	10q_19p	307325.76	1	0.87
CIGENEomyV6.16062	CIGENEomyV6.86073	90.47	1973	170	8	1	1965	1965	19	1981	1981	0	3395	5	29	5-29	16458370	16490740	5p_29	8250981	8340887	5p_29	5p_29	5p_29	307145.65	1	0.99
CIGENEomyV6.75245	CIGENEomyV6.82618	97.35	1698	38	5	34	1730	1730	48	1739	1739	0	3155	24	27	24-27	17233010	17264002	24_27	20475648	20510566	24_27	24_27	24_27	307139.25	0.98	0.97
CIGENEomyV6.23944	CIGENEomyV6.61984	97.22	1765	47	2	1	1764	1764	1	1764	1764	0	3122	7	18	7-18	18489351	18552533	7p_18p	20415335	20478540	7p_18p	7p_18p	7p_18p	303520.84	1	1
CIGENEomyV6.67908	CIGENEomyV6.73730	94.42	1630	91	0	165	1794	1794	1	1630	1630	0	3210	20	23	20-23	32098143	32175578	20q_23	28862731	28991210	20q_23	20q_23	20q_23	303088.2	0.91	1
CIGENEomyV6.13910	CIGENEomyV6.27152	89.5	1791	187	1	1	1790	1790	150	1940	1940	0	3369	4	8	4-8	57187586	57216025	4q_8p	15281432	15318220	4q_8p	4q_8p	4q_8p	301525.5	1	0.92
CIGENEomyV6.13779	CIGENEomyV6.26997	92.48	1768	110	6	1	1748	1748	1	1765	1765	0	3258	4	8	4-8	53189560	53234270	4q_8p	11390102	11439357	4q_8p	4q_8p	4q_8p	301299.84	1.01	1
CIGENEomyV6.25296	CIGENEomyV6.59297	95.33	1650	69	1	1	1650	1650	469	2110	2110	0	3137	7	17	7-17	57330721	57380532	7q_17q	40227018	40278706	7q_17q	7q_17q	7q_17q	299050.21	1	0.78
CIGENEomyV6.74647	CIGENEomyV6.81967	94.26	1760	95	3	1	1760	1763	1	1754	1754	0	3166	24	27	24-27	4180978	4278428	24_27	5930483	6024274	24_27	24_27	24_27	298427.16	1	1
CIGENEomyV6.54548	CIGENEomyV6.67084	82.98	2168	236	9	1	2109	2109	1	2094	2094	0	3588	16	20	16-20	11444352	11469425	16p_20p	12145599	12169022	16p_20p	16p_20p	16p_20p	297732.24	1.02	1.03
CIGENEomyV6.45122	CIGENEomyV6.58373	92.24	1843	116	10	1	1831	2907	1	1828	1841	0	3218	13	17	13-17	21119993	21177119	13p_17p	16883644	16921653	13p_17p	13p_17p	13p_17p	296828.32	0.63	1
CIGENEomyV6.42341	CIGENEomyV6.45641	98.56	1528	20	2	1	1527	1549	1	1527	1572	0	2998	12	13	12-13	65033164	65058790	12q_13q	32208241	32233403	12q_13q	12q_13q	12q_13q	295482.88	0.99	0.97
CIGENEomyV6.53017	CIGENEomyV6.69481	96.52	1525	30	2	85	1586	1933	1	1525	1525	0	3061	15	21	15-21	46406912	46552512	15q_21p	21834223	21920200	15q_21p	15q_21p	15q_21p	295447.72	0.79	1
CIGENEomyV6.53498	CIGENEomyV6.68975	95.74	1666	60	4	1	1665	1665	1	1656	1656	0	3080	15	21	15-21	56222816	56246702	15q_21p	11871331	11897513	15q_21p	15q_21p	15q_21p	294879.2	1	1
CIGENEomyV6.1212	CIGENEomyV6.6037	92.8	1819	111	6	2	1820	1820	1	1799	1799	0	3177	1	2	1-2	26967260	27001266	1p_2q	56457823	56496677	1p_2q	1p_2q	1p_2q	294825.6	1	1.01
CIGENEomyV6.42785	CIGENEomyV6.45940	97.51	1527	30	4	1	1520	1531	1	1526	1532	0	3003	12	13	12-13	73672012	73690257	12q_13q	37992853	38006674	12q_13q	12q_13q	12q_13q	292822.53	0.99	0.99
CIGENEomyV6.23064	CIGENEomyV6.61202	98.89	1439	16	0	1	1439	1439	1	1439	1439	0	2948	7	18	7-18	1655516	1719636	7p_18p	4717557	4772758	7p_18p	7p_18p	7p_18p	291527.72	1	1
CIGENEomyV6.34853	CIGENEomyV6.40764	94.36	1579	53	4	1	1573	1573	872	2420	2420	0	3074	10	12	10-12	36382387	36435918	10p_12p	20869646	20922197	10p_12p	10p_12p	10p_12p	290062.64	1	0.65
CIGENEomyV6.42943	CIGENEomyV6.46274	99.17	1440	10	1	1	1440	1440	1	1438	1438	0	2909	12	13	12-13	76484813	76543967	12q_13q	43437629	43523669	12q_13q	12q_13q	12q_13q	288485.53	1	1
CIGENEomyV6.20012	CIGENEomyV6.37943	94.35	1541	79	1	1	1533	1533	923	2463	2463	0	3052	6	11	6-11	14500559	14533027	6p_11q	43181152	43226092	6p_11q	6p_11q	6p_11q	287956.2	1	0.63
CIGENEomyV6.10041	CIGENEomyV6.71377	88.61	1896	144	9	15	1880	1902	133	1986	2001	0	3240	3	22	3-22	51603013	51720886	3q_22p	15759917	15794705	3q_22p	3q_22p	3q_22p	287096.4	0.99	0.94
CIGENEomyV6.20443	CIGENEomyV6.38365	95.16	1569	70	2	1	1569	1569	306	1868	1868	0	3001	6	11	6-11	23555801	23609500	6p_11q	52499376	52532452	6p_11q	6p_11q	6p_11q	285575.16	1	0.84
CIGENEomyV6.16481	CIGENEomyV6.86474	90.65	1828	132	12	83	1893	1893	31	1836	1836	0	3136	5	29	5-29	26279999	26303989	5p_29	19178217	19197868	5p_29	5p_29	5p_29	284278.4	0.96	0.99
CIGENEomyV6.28446	CIGENEomyV6.84942	93.57	1539	99	0	1	1539	1539	1	1539	1539	0	3036	8	28	8-28	51073981	51105960	8q_28	28305180	28340092	8q_28	8q_28	8q_28	284078.52	1	1
CIGENEomyV6.28731	CIGENEomyV6.84759	92.91	1594	112	1	1	1594	1596	1	1593	1701	0	3054	8	28	8-28	57561513	57674813	8q_28	22713212	22793745	8q_28	8q_28	8q_28	283747.14	1	0.94
CIGENEomyV6.71436	CIGENEomyV6.9989	87.58	1836	201	8	1	1813	1830	1	1832	1849	0	3221	22	3	3-22	17758348	17838620	3q_22p	49507841	49609066	3q_22p	3q_22p	3q_22p	282095.18	1	0.99
CIGENEomyV6.4464	CIGENEomyV6.9034	96.6	1502	46	2	1	1501	1501	1	1498	1498	0	2917	2	3	2-3	15031119	15077850	2p_3p	24749854	24786224	2p_3p	2p_3p	2p_3p	281782.2	1	1
CIGENEomyV6.67802	CIGENEomyV6.74412	89.1	1798	163	12	29	1811	1811	1	1780	1780	0	3161	20	23	20-23	29445151	29532283	20q_23	46827121	46903210	20q_23	20q_23	20q_23	281645.1	0.99	1
CIGENEomyV6.31507	CIGENEomyV6.56556	94.18	1616	75	5	498	2095	2095	1	1615	1615	0	2981	9	16	9-16	27421200	27518930	9q_16q	57992797	58018699	9q_16q	9q_16q	9q_16q	280750.58	0.77	1
CIGENEomyV6.34610	CIGENEomyV6.41055	90.76	1829	151	10	1	1811	1811	1	1829	1829	0	3077	10	12	10-12	30084094	30116867	10p_12p	26959070	26997638	10p_12p	10p_12p	10p_12p	279268.52	1	0.99
CIGENEomyV6.24922	CIGENEomyV6.59710	85.84	2055	215	6	1	2045	2045	1	1989	1989	0	3247	7	17	7-17	49437170	49461662	7q_17q	48581690	48642661	7q_17q	7q_17q	7q_17q	278722.48	1	1.03
CIGENEomyV6.52900	CIGENEomyV6.69594	94.59	1589	69	3	1	1572	1572	1	1589	1589	0	2941	15	21	15-21	43709074	43751552	15q_21p	24339652	24403342	15q_21p	15q_21p	15q_21p	278189.19	1.01	1
CIGENEomyV6.75667	CIGENEomyV6.83021	94.55	1559	85	0	1	1559	1559	237	1795	1806	0	2935	24	27	24-27	27842894	27858762	24_27	30380983	30404621	24_27	24_27	24_27	277504.25	1	0.86
CIGENEomyV6.17186	CIGENEomyV6.40165	90.28	1770	155	9	1	1758	2547	1	1765	1765	0	3071	5	12	5-12	43401626	43496787	5p_12p	8315704	8350390	5p_12p	5p_12p	5p_12p	277249.88	0.69	1
CIGENEomyV6.34863	CIGENEomyV6.40754	92.4	1578	111	4	1	1576	1576	1	1571	1571	0	2994	10	12	10-12	36759754	36786169	10p_12p	20392658	20423675	10p_12p	10p_12p	10p_12p	276645.6	1	1
CIGENEomyV6.20583	CIGENEomyV6.38527	93.02	1547	74	2	16	1528	1974	42	1588	1780	0	2962	6	11	6-11	27077948	27244043	6p_11q	56207349	56681470	6p_11q	6p_11q	6p_11q	275525.24	0.78	0.87
CIGENEomyV6.10827	CIGENEomyV6.71718	85.79	1949	233	15	2	1925	1925	388	2317	2317	0	3206	3	22	3-22	70293593	70396558	3q_22q	25371458	25463007	3q_22q	3q_22q	3q_22q	275042.74	1	0.83
CIGENEomyV6.4852	CIGENEomyV6.9451	92.74	1529	111	0	15	1543	1550	1	1529	1665	0	2959	2	3	2-3	22517917	22549828	2p_3p	32564841	32570840	2p_3p	2p_3p	2p_3p	274417.66	0.99	0.92
CIGENEomyV6.23808	CIGENEomyV6.61829	92.79	1887	112	9	1	1877	1885	30	1902	2427	0	2930	7	18	7-18	14837491	14899837	7p_18p	16691442	16726378	7p_18p	7p_18p	7p_18p	271874.7	1	0.77
CIGENEomyV6.65123	CIGENEomyV6.79288	95.21	1503	72	0	1	1503	1503	1	1503	1503	0	2848	19	25	19-25	29897492	29935978	19q_25q	68666369	68717431	19q_25q	19q_25q	19q_25q	271158.08	1	1
CIGENEomyV6.35023	CIGENEomyV6.86846	92.99	1554	89	4	37	1573	2184	1	1551	2342	0	2914	10	29	10-29	40474615	40569154	10p_29	29124974	29195189	10p_29	10p_29	10p_29	270972.86	0.71	0.66
CIGENEomyV6.23578	CIGENEomyV6.61655	92.94	1559	88	4	1	1543	1543	1	1553	1553	0	2913	7	18	7-18	10255815	10349696	7p_18p	12345310	12361027	7p_18p	7p_18p	7p_18p	270734.22	1.01	1
CIGENEomyV6.32463	CIGENEomyV6.55885	91.5	1611	118	8	2	1605	1605	1	1599	1599	0	2954	9	16	9-16	51228535	51254472	9q_16q	43602871	43626650	9q_16q	9q_16q	9q_16q	270291	1	1
CIGENEomyV6.42850	CIGENEomyV6.46166	98.61	1509	17	2	1	1505	1505	1	1509	1638	0	2722	12	13	12-13	74537945	74789037	12q_13q	41672047	41704804	12q_13q	12q_13q	12q_13q	268416.42	1	0.92
CIGENEomyV6.45359	CIGENEomyV6.58494	94.75	1523	77	1	1	1520	1680	28	1550	1551	0	2832	13	17	13-17	26089762	26204802	13p_17p	18805022	18947685	13p_17p	13p_17p	13p_17p	268332	0.91	0.98
CIGENEomyV6.5092	CIGENEomyV6.9699	87.12	1964	223	13	1	1950	1958	1	1948	1978	0	3075	2	3	2-3	28541998	28610486	2p_3p	39316479	39408386	2p_3p	2p_3p	2p_3p	267894	1	0.99
CIGENEomyV6.24777	CIGENEomyV6.59857	88.99	1807	171	11	1	1796	1796	1	1790	1790	0	3005	7	17	7-17	44997203	45098751	7q_17q	52428055	52503500	7q_17q	7q_17q	7q_17q	267414.95	1	1
CIGENEomyV6.1910	CIGENEomyV6.6706	82.66	2099	294	23	1	2064	2090	1	2064	2110	0	3235	1	2	1-2	44874208	44927208	1p_2q	73921549	73942196	1p_2q	1p_2q	1p_2q	267405.1	0.99	0.98
CIGENEomyV6.75192	CIGENEomyV6.82549	95.19	1456	56	6	1	1443	1443	1	1455	1455	0	2808	24	27	24-27	15886244	15912845	24_27	19034300	19061007	24_27	24_27	24_27	267293.52	1	1
CIGENEomyV6.10316	CIGENEomyV6.72143	99.62	1329	3	1	15	1341	1341	1	1329	1329	0	2680	3	22	3-22	58697632	59093842	3q_22q	37121627	37150773	3q_22q	3q_22q	3q_22q	266981.6	0.99	1
CIGENEomyV6.65293	CIGENEomyV6.79106	96.47	1390	37	2	1	1386	1387	1	1382	1401	0	2758	19	25	19-25	34974654	35018240	19q_25q	63345394	63401550	19q_25q	19q_25q	19q_25q	266064.26	1	0.99
CIGENEomyV6.12830	CIGENEomyV6.18174	97.53	1376	33	1	1	1376	1379	1	1375	1455	0	2727	4	5	4-5	23801863	23852310	4p_5q	69029667	69060636	4p_5q	4p_5q	4p_5q	265964.31	1	0.95
CIGENEomyV6.16751	CIGENEomyV6.40670	88.69	1892	179	10	1	1882	1882	1	1867	1867	0	2989	5	12	5-12	33780451	33821915	5p_12p	18158495	18190743	5p_12p	5p_12p	5p_12p	265094.41	1	1.01
CIGENEomyV6.13798	CIGENEomyV6.27019	81.39	2273	287	34	1	2251	2251	1	2159	2159	0	3249	4	8	4-8	53624364	53740350	4q_8p	11747253	11866816	4q_8p	4q_8p	4q_8p	264436.11	0.99	1.04
CIGENEomyV6.74487	CIGENEomyV6.81998	98.32	1311	22	0	2	1312	1542	1	1311	1349	0	2684	24	27	24-27	261821	606484	24_27	6654012	6727904	24_27	24_27	24_27	263890.88	0.85	0.97
CIGENEomyV6.75339	CIGENEomyV6.82701	87.79	1728	180	9	1	1706	1706	1	1719	1719	0	2994	24	27	24-27	19329915	19382366	24_27	22660300	22716417	24_27	24_27	24_27	262843.26	1.01	1
CIGENEomyV6.25360	CIGENEomyV6.59229	90.64	1645	130	9	3	1629	1629	1	1639	1639	0	2898	7	17	7-17	59297902	59335462	7q_17q	38191161	38231453	7q_17q	7q_17q	7q_17q	262674.72	1	1
CIGENEomyV6.74720	CIGENEomyV6.82089	96.02	1459	52	2	151	1607	1618	1	1455	1466	0	2728	24	27	24-27	6157581	6199044	24_27	8852469	8921726	24_27	24_27	24_27	261942.56	0.9	0.99
CIGENEomyV6.52891	CIGENEomyV6.69601	96.91	1393	39	2	1	1390	2371	1	1392	1392	0	2695	15	21	15-21	43375172	43479841	15q_21p	24610524	24666229	15q_21p	15q_21p	15q_21p	261172.45	0.59	1
CIGENEomyV6.42729	CIGENEomyV6.45988	97.7	1390	24	2	498	1880	1880	1	1389	1389	0	2673	12	13	12-13	72639070	72784730	12q_13q	38847775	38989799	12q_13q	12q_13q	12q_13q	261152.1	0.74	1
CIGENEomyV6.32514	CIGENEomyV6.55815	90.83	1549	132	6	1	1544	1544	1	1544	1544	0	2871	9	16	9-16	51976692	52014964	9q_16q	42875156	42912262	9q_16q	9q_16q	9q_16q	260772.93	1	1
CIGENEomyV6.28289	CIGENEomyV6.85132	89.98	1587	151	5	1	1584	1948	1	1582	1582	0	2885	8	28	8-28	47700963	47754897	8q_28	31369857	31405048	8q_28	8q_28	8q_28	259592.3	0.81	1
CIGENEomyV6.28984	CIGENEomyV6.84504	89	1763	172	10	1	1754	1755	1	1750	1756	0	2915	8	28	8-28	64893025	64970428	8q_28	15309236	15387178	8q_28	8q_28	8q_28	259435	1	1
CIGENEomyV6.1160	CIGENEomyV6.5990	95.34	1417	64	1	1	1417	1417	1	1415	1415	0	2721	1	2	1-2	25546838	25710145	1p_2q	55226555	55335354	1p_2q	1p_2q	1p_2q	259420.14	1	1
CIGENEomyV6.14177	CIGENEomyV6.27440	90.35	1575	113	10	18	1563	1563	1	1565	1565	0	2870	4	8	4-8	64015217	64062843	4q_8p	22408681	22484953	4q_8p	4q_8p	4q_8p	259304.5	1	1
CIGENEomyV6.23644	CIGENEomyV6.61695	97.28	1324	36	0	1	1324	1324	44	1367	1367	0	2664	7	18	7-18	11233654	11260039	7p_18p	13042303	13138230	7p_18p	7p_18p	7p_18p	259153.92	1	0.97
CIGENEomyV6.50187	CIGENEomyV6.77890	94.11	1427	80	3	1	1426	1426	1	1424	1424	0	2747	14	25	14-25	56831827	56873360	14q_25p	29607767	29646877	14q_25p	14q_25p	14q_25p	258520.17	1	1
CIGENEomyV6.29063	CIGENEomyV6.84444	89.28	1651	153	8	1	1643	1643	1	1635	1635	0	2895	8	28	8-28	66546725	66641936	8q_28	13373086	13434823	8q_28	8q_28	8q_28	258465.6	1	1
CIGENEomyV6.35692	CIGENEomyV6.64631	81.98	2175	294	30	1	2113	2113	1	2139	2139	0	3151	10	19	10-19	55296850	55335768	10q_19p	16157109	16194520	10q_19p	10q_19p	10q_19p	258318.98	1.02	1
CIGENEomyV6.37663	CIGENEomyV6.52378	94.44	1385	77	0	1	1385	1385	106	1490	1490	0	2722	11	15	11-15	33220704	33285152	11p_15p	24756951	24828402	11p_15p	11p_15p	11p_15p	257065.68	1	0.93
CIGENEomyV6.44978	CIGENEomyV6.58201	92.61	1557	107	3	1	1549	1549	1	1557	1557	0	2773	13	17	13-17	17813585	17860595	13p_17p	13434005	13486792	13p_17p	13p_17p	13p_17p	256807.53	1	1
CIGENEomyV6.25516	CIGENEomyV6.59096	87.35	1802	203	15	1560	3344	3344	41	1834	1834	0	2938	7	17	7-17	62616119	62644466	7q_17q	34835279	34851352	7q_17q	7q_17q	7q_17q	256634.3	0.53	0.97
CIGENEomyV6.75358	CIGENEomyV6.82711	82.76	1984	278	18	1	1963	1963	1	1941	1941	0	3098	24	27	24-27	19745333	19773476	24_27	23036022	23057028	24_27	24_27	24_27	256390.48	1	1.01
CIGENEomyV6.67917	CIGENEomyV6.73739	93.62	1442	81	3	1	1436	1436	1	1437	1437	0	2735	20	23	20-23	32389051	32408646	20q_23	29268012	29288183	20q_23	20q_23	20q_23	256050.7	1	1
CIGENEomyV6.31114	CIGENEomyV6.70277	91.95	1578	62	7	1	1570	1570	1	1521	1521	0	2784	9	21	9-21	14297984	14610021	9p_21q	38228567	38545148	9p_21q	9p_21q	9p_21q	255988.8	1	1.03
CIGENEomyV6.34305	CIGENEomyV6.41426	84.11	1900	268	14	47	1925	1925	1	1887	1887	0	3040	10	12	10-12	19864768	20081240	10p_12p	37558909	37677822	10p_12p	10p_12p	10p_12p	255694.4	0.98	1
CIGENEomyV6.43075	CIGENEomyV6.46423	96.07	1452	49	4	1	1445	1445	1	1451	1451	0	2647	12	13	12-13	79247836	79262805	12q_13q	45794714	45807002	12q_13q	12q_13q	12q_13q	254297.29	1	1
CIGENEomyV6.21958	CIGENEomyV6.80762	95.02	1465	60	5	1	1455	1455	1	1462	1462	0	2676	6	26	6-26	63587475	63631462	6q_26	18714677	18749542	6q_26	6q_26	6q_26	254273.52	1	1
CIGENEomyV6.28767	CIGENEomyV6.84728	94.93	1459	68	2	1	1453	1455	1	1459	1461	0	2675	8	28	8-28	58948792	58990345	8q_28	21407704	21442412	8q_28	8q_28	8q_28	253937.75	1	1
CIGENEomyV6.1966	CIGENEomyV6.6790	94.37	1474	70	4	1	1469	1479	1	1466	2035	0	2688	1	2	1-2	47267419	47297654	1p_2q	76271942	76309365	1p_2q	1p_2q	1p_2q	253666.56	0.99	0.72
CIGENEomyV6.35217	CIGENEomyV6.87078	90.24	1629	138	5	1	1627	2288	1	1610	1610	0	2808	10	29	10-29	43683805	43714006	10p_29	32897526	32911417	10p_29	10p_29	10p_29	253393.92	0.71	1.01
CIGENEomyV6.23038	CIGENEomyV6.61154	98.97	1267	13	0	1	1267	1267	553	1819	1819	0	2560	7	18	7-18	1286163	1301105	7p_18p	3672649	3689257	7p_18p	7p_18p	7p_18p	253363.2	1	0.7
CIGENEomyV6.29116	CIGENEomyV6.84402	94.71	1362	72	0	1	1362	1386	1	1362	1364	0	2664	8	28	8-28	68093874	68161238	8q_28	11716664	11791337	8q_28	8q_28	8q_28	252307.44	0.98	1
CIGENEomyV6.42690	CIGENEomyV6.46028	91.05	1932	133	14	14	1927	1927	14	1923	1923	0	2771	12	13	12-13	71925954	71955172	12q_13q	39652254	39675658	12q_13q	12q_13q	12q_13q	252299.55	1	1
CIGENEomyV6.22218	CIGENEomyV6.81007	97.07	1299	14	1	1	1299	1299	1	1275	1275	0	2597	6	26	6-26	69332021	69396620	6q_26	24244736	24294061	6q_26	6q_26	6q_26	252090.79	1	1.02
CIGENEomyV6.29259	CIGENEomyV6.84310	92.37	1573	90	7	1	1565	1566	1	1551	2571	0	2726	8	28	8-28	70165515	70202495	8q_28	9859863	9890280	8q_28	8q_28	8q_28	251800.62	1	0.61
CIGENEomyV6.1251	CIGENEomyV6.6073	98.57	1261	17	1	1	1261	1261	1	1260	1260	0	2552	1	2	1-2	28551722	28586166	1p_2q	58039038	58089277	1p_2q	1p_2q	1p_2q	251550.64	1	1
CIGENEomyV6.24178	CIGENEomyV6.58691	89.05	1589	146	11	1	1573	1573	628	2204	3093	0	2822	7	17	7-17	25864151	25892436	7q_17q	22626155	22826520	7q_17q	7q_17q	7q_17q	251299.1	1	0.51
CIGENEomyV6.42633	CIGENEomyV6.46083	98.48	1317	20	0	1	1317	1317	1	1317	1317	0	2543	12	13	12-13	71190582	71202917	12q_13q	40384361	40410731	12q_13q	12q_13q	12q_13q	250434.64	1	1
CIGENEomyV6.44736	CIGENEomyV6.57943	97.71	1354	23	2	1	1346	1369	1	1354	1377	0	2560	13	17	13-17	12837280	12851574	13p_17p	7850921	7878963	13p_17p	13p_17p	13p_17p	250137.6	0.99	0.98
CIGENEomyV6.22375	CIGENEomyV6.81176	95.53	1433	50	2	1	1426	1448	1	1426	1433	0	2614	6	26	6-26	73807878	73858176	6q_26	28897111	28938097	6q_26	6q_26	6q_26	249715.42	0.99	1
CIGENEomyV6.45135	CIGENEomyV6.58388	96.21	1400	40	7	1	1398	1426	50	1438	1632	0	2595	13	17	13-17	21335214	21355515	13p_17p	17058140	17092649	13p_17p	13p_17p	13p_17p	249664.95	0.98	0.85
CIGENEomyV6.44824	CIGENEomyV6.58049	97.37	1253	33	0	1	1253	1253	1	1253	1253	0	2558	13	17	13-17	14201147	14412676	13p_17p	10016868	10236015	13p_17p	13p_17p	13p_17p	249072.46	1	1
CIGENEomyV6.67539	CIGENEomyV6.74138	94.21	1400	81	0	965	2364	2527	1	1400	1404	0	2643	20	23	20-23	21554362	21591924	20q_23	39738502	39749621	20q_23	20q_23	20q_23	248997.03	0.55	1
CIGENEomyV6.28862	CIGENEomyV6.84623	96.35	1315	48	0	1	1315	1315	1	1315	1315	0	2582	8	28	8-28	61449303	61541478	8q_28	18834482	18907545	8q_28	8q_28	8q_28	248775.7	1	1
CIGENEomyV6.29027	CIGENEomyV6.84473	91.28	1502	92	10	26	1495	1495	14	1508	1508	0	2719	8	28	8-28	65785317	65920095	8q_28	14441425	14549657	8q_28	8q_28	8q_28	248190.32	1	0.99
CIGENEomyV6.29232	CIGENEomyV6.84330	98.37	1224	20	0	1	1224	1224	1	1224	1224	0	2519	8	28	8-28	69766174	69785023	8q_28	10183341	10208613	8q_28	8q_28	8q_28	247794.03	1	1
CIGENEomyV6.25380	CIGENEomyV6.59209	98.23	1243	21	1	1	1243	1253	1	1242	1336	0	2521	7	17	7-17	59912150	60087928	7q_17q	37365705	37532297	7q_17q	7q_17q	7q_17q	247637.83	0.99	0.93
CIGENEomyV6.28947	CIGENEomyV6.84544	94	1399	78	4	14	1407	1407	70	1467	1467	0	2629	8	28	8-28	63458584	63638750	8q_28	16683047	16832327	8q_28	8q_28	8q_28	247126	0.99	0.95
CIGENEomyV6.34717	CIGENEomyV6.40925	96.29	1321	49	0	3	1323	1531	1	1321	1345	0	2566	10	12	10-12	32332835	32360290	10p_12p	24760948	24773774	10p_12p	10p_12p	10p_12p	247080.14	0.86	0.98
CIGENEomyV6.4846	CIGENEomyV6.9435	94.59	1332	68	1	1	1332	1336	1	1328	1330	0	2607	2	3	2-3	22358546	22398507	2p_3p	32414059	32451126	2p_3p	2p_3p	2p_3p	246596.13	1	1
CIGENEomyV6.24579	CIGENEomyV6.60079	92.16	1403	74	4	13	1380	1403	1	1402	1405	0	2674	7	17	7-17	38631041	38652856	7q_17q	59023551	59041105	7q_17q	7q_17q	7q_17q	246435.84	1	1
CIGENEomyV6.75341	CIGENEomyV6.82702	94.89	1449	45	1	2	1450	1450	23	1442	1442	0	2596	24	27	24-27	19391778	19462316	24_27	22709564	22791758	24_27	24_27	24_27	246334.44	1	1
CIGENEomyV6.25241	CIGENEomyV6.59372	90.25	1497	138	4	1	1492	1492	1	1494	1494	0	2729	7	17	7-17	55967820	56000048	7q_17q	41641969	41685026	7q_17q	7q_17q	7q_17q	246292.25	1	1
CIGENEomyV6.24620	CIGENEomyV6.60033	81.01	2154	311	30	247	2349	2365	154	2260	2260	0	3038	7	17	7-17	39601784	39629067	7q_17q	58063096	58117447	7q_17q	7q_17q	7q_17q	246108.38	0.9	0.94
CIGENEomyV6.1243	CIGENEomyV6.6058	92.23	1481	105	6	1	1472	1472	1	1480	1480	0	2665	1	2	1-2	28184458	28280644	1p_2q	57603393	57731178	1p_2q	1p_2q	1p_2q	245792.95	1	1
CIGENEomyV6.50186	CIGENEomyV6.77888	92.42	1412	82	2	1	1391	1394	1	1408	1411	0	2655	14	25	14-25	56783599	56789308	14q_25p	29561920	29567611	14q_25p	14q_25p	14q_25p	245375.1	1.01	1
CIGENEomyV6.13937	CIGENEomyV6.27187	93.49	1367	89	0	1	1367	1367	1	1367	1367	0	2605	4	8	4-8	57735902	57803149	4q_8p	15939188	15996855	4q_8p	4q_8p	4q_8p	243541.45	1	1
CIGENEomyV6.31322	CIGENEomyV6.70501	80.78	1972	323	17	336	2287	2414	1	1936	2441	0	3004	9	21	9-21	21115905	21351637	9p_21q	45270750	45313303	9p_21q	9p_21q	9p_21q	242663.12	0.81	0.8
CIGENEomyV6.2665	CIGENEomyV6.73177	94.73	1518	61	6	1	1508	1976	1	1509	1509	0	2561	1	23	1-23	66287723	66322488	1q_23	10739394	11022281	1q_23	1q_23	1q_23	242603.53	0.77	1
CIGENEomyV6.34661	CIGENEomyV6.41014	97.78	1309	22	3	1	1307	1307	1	1304	1304	0	2480	10	12	10-12	31060598	31193540	10p_12p	26111807	26152283	10p_12p	10p_12p	10p_12p	242494.4	1	1
CIGENEomyV6.44756	CIGENEomyV6.57930	95.9	1317	54	0	1	1317	1319	1	1317	1811	0	2525	13	17	13-17	12997748	13018906	13p_17p	7706339	7741650	13p_17p	13p_17p	13p_17p	242147.5	1	0.73
CIGENEomyV6.48741	CIGENEomyV6.62709	96.85	1334	40	2	1	1334	1437	1	1332	1360	0	2496	14	18	14-18	23803837	23913166	14p_18q	38093880	38196254	14p_18q	14p_18q	14p_18q	241737.6	0.93	0.98
CIGENEomyV6.53132	CIGENEomyV6.69374	97.44	1289	30	2	1	1288	1288	1	1287	1287	0	2479	15	21	15-21	49369109	49446053	15q_21p	19086505	19162509	15q_21p	15q_21p	15q_21p	241553.76	1	1
CIGENEomyV6.31937	CIGENEomyV6.55354	87.03	1581	192	4	153	1727	2064	8	1581	1582	0	2773	9	16	9-16	37364764	37639110	9q_16q	32514444	32843031	9q_16q	9q_16q	9q_16q	241334.19	0.76	1
CIGENEomyV6.23926	CIGENEomyV6.61967	96.86	1275	40	0	1	1275	1275	1	1275	1275	0	2481	7	18	7-18	18125200	18151004	7p_18p	20072780	20091009	7p_18p	7p_18p	7p_18p	240309.66	1	1
CIGENEomyV6.42190	CIGENEomyV6.45503	94.62	1302	68	1	1	1302	1302	1	1300	1300	0	2534	12	13	12-13	61193341	61201543	12q_13q	29141996	29193568	12q_13q	12q_13q	12q_13q	239767.08	1	1
CIGENEomyV6.24591	CIGENEomyV6.60058	89.93	1659	124	14	2	1642	1644	12	1645	1647	0	2661	7	17	7-17	38884699	38898509	7q_17q	58760916	58774590	7q_17q	7q_17q	7q_17q	239303.73	1	1
CIGENEomyV6.49729	CIGENEomyV6.77373	88.26	1652	150	13	232	1875	1875	1	1616	1616	0	2711	14	25	14-25	47338465	47358571	14q_25p	19812374	19832619	14q_25p	14q_25p	14q_25p	239272.86	0.87	1.01
CIGENEomyV6.10626	CIGENEomyV6.71866	84.57	1841	237	20	1	1813	1813	1	1822	1822	0	2828	3	22	3-22	66359054	66392323	3q_22q	29147068	29170205	3q_22q	3q_22q	3q_22q	239163.96	1	1
CIGENEomyV6.64873	CIGENEomyV6.79596	80.52	1976	288	23	1	1905	1905	1	1950	1950	0	2965	19	25	19-25	23502868	23516517	19q_25q	75424774	75461957	19q_25q	19q_25q	19q_25q	238741.8	1.03	1
CIGENEomyV6.42766	CIGENEomyV6.45960	97.86	1306	21	3	742	2045	2045	1	1301	1301	0	2432	12	13	12-13	73218290	73248053	12q_13q	38464301	38476669	12q_13q	12q_13q	12q_13q	237995.52	0.64	1
CIGENEomyV6.74951	CIGENEomyV6.82334	91.13	1455	121	5	1	1448	1448	104	1557	1616	0	2608	24	27	24-27	11025037	11064741	24_27	14026785	14092503	24_27	24_27	24_27	237667.04	1	0.9
CIGENEomyV6.23937	CIGENEomyV6.61981	95.44	1558	54	6	1	1547	1547	1	1552	1552	0	2489	7	18	7-18	18351845	18395913	7p_18p	20272520	20384451	7p_18p	7p_18p	7p_18p	237550.16	1	1
CIGENEomyV6.20772	CIGENEomyV6.38747	96.45	1266	40	3	1	1263	1263	1	1264	1264	0	2457	6	11	6-11	30977001	31001497	6p_11q	60206965	60233923	6p_11q	6p_11q	6p_11q	236977.65	1	1
CIGENEomyV6.34871	CIGENEomyV6.40747	92.23	1480	104	5	1	1474	1484	182	1656	1666	0	2569	10	12	10-12	37070244	37119564	10p_12p	20068620	20263929	10p_12p	10p_12p	10p_12p	236938.87	0.99	0.89
CIGENEomyV6.22024	CIGENEomyV6.80829	93.97	1359	51	3	1	1331	1331	1	1356	1356	0	2520	6	26	6-26	64458213	64470341	6q_26	19647266	19661788	6q_26	6q_26	6q_26	236804.4	1.02	1
CIGENEomyV6.65308	CIGENEomyV6.79087	90.8	1392	119	6	1	1389	1389	1	1386	1386	0	2605	19	25	19-25	35144458	35189730	19q_25q	63158789	63199576	19q_25q	19q_25q	19q_25q	236534	1	1
CIGENEomyV6.14192	CIGENEomyV6.27452	87.84	1596	159	13	1	1579	1579	277	1854	1854	0	2692	4	8	4-8	64284102	64297319	4q_8p	22641438	22666324	4q_8p	4q_8p	4q_8p	236465.28	1	0.85
CIGENEomyV6.54540	CIGENEomyV6.67076	82.35	1751	239	16	343	2088	2272	112	1797	1853	0	2871	16	20	16-20	11285492	11367068	16p_20p	11933421	12016408	16p_20p	16p_20p	16p_20p	236426.85	0.76	0.94
CIGENEomyV6.28750	CIGENEomyV6.84736	91.61	1347	113	0	29	1375	1381	18	1364	1456	0	2580	8	28	8-28	58576027	58704359	8q_28	21685978	21881664	8q_28	8q_28	8q_28	236353.8	0.98	0.93
CIGENEomyV6.23083	CIGENEomyV6.61222	97.89	1232	26	0	1	1232	1232	1	1232	1232	0	2410	7	18	7-18	2035003	2118198	7p_18p	5330015	5431061	7p_18p	7p_18p	7p_18p	235914.9	1	1
CIGENEomyV6.20839	CIGENEomyV6.38800	85.84	1942	212	21	1	1892	1892	324	2252	2252	0	2747	6	11	6-11	32807659	32845762	6p_11q	62386896	62430848	6p_11q	6p_11q	6p_11q	235802.48	1.02	0.85
CIGENEomyV6.20808	CIGENEomyV6.38771	90.34	1552	138	6	1	1548	1550	1	1544	1546	0	2605	6	11	6-11	31951824	31970689	6p_11q	61317498	61350347	6p_11q	6p_11q	6p_11q	235335.7	1	1
CIGENEomyV6.34697	CIGENEomyV6.40958	96.55	1274	42	2	1	1272	1272	1	1274	1274	0	2432	10	12	10-12	32031566	32055570	10p_12p	25133661	25148051	10p_12p	10p_12p	10p_12p	234809.6	1	1
CIGENEomyV6.53072	CIGENEomyV6.69425	92.55	1477	60	8	1	1440	1440	80	1543	1543	0	2533	15	21	15-21	48094788	48270770	15q_21p	20298832	20340591	15q_21p	15q_21p	15q_21p	234429.15	1.02	0.95
CIGENEomyV6.22287	CIGENEomyV6.81075	95.06	1438	50	4	1	1420	1420	1	1435	1435	0	2466	6	26	6-26	70980345	70993738	6q_26	25858981	25874418	6q_26	6q_26	6q_26	234417.96	1.01	1
CIGENEomyV6.16956	CIGENEomyV6.40440	92.65	1415	75	7	1	1407	1409	2	1395	1404	0	2522	5	12	5-12	38074399	38105758	5p_12p	13617089	13650901	5p_12p	5p_12p	5p_12p	233663.3	1	1
CIGENEomyV6.54804	CIGENEomyV6.66765	85.16	1644	203	13	31	1649	1649	9	1636	1636	0	2743	16	20	16-20	17467982	17500971	16p_20p	4771202	4853756	16p_20p	16p_20p	16p_20p	233593.88	0.99	1
CIGENEomyV6.48642	CIGENEomyV6.62818	87.65	1684	175	15	1	1668	1668	1	1667	2104	0	2660	14	18	14-18	21509671	21548797	14p_18q	40775421	40797652	14p_18q	14p_18q	14p_18q	233149	1	0.79
CIGENEomyV6.45233	CIGENEomyV6.58482	95.43	1248	55	1	1	1248	1248	1	1246	1246	0	2442	13	17	13-17	23203062	23236370	13p_17p	18534984	18567203	13p_17p	13p_17p	13p_17p	233040.06	1	1
CIGENEomyV6.43921	CIGENEomyV6.57537	98.77	1216	15	0	1	1216	1216	418	1633	1633	0	2359	13	17	13-17	2086190	2423642	13p_17p	2526954	3173822	13p_17p	13p_17p	13p_17p	232998.43	1	0.74
CIGENEomyV6.1140	CIGENEomyV6.5969	90.44	1443	80	10	1	1409	1409	1	1419	1419	0	2572	1	2	1-2	24994091	25029833	1p_2q	54673669	54715904	1p_2q	1p_2q	1p_2q	232611.68	1.02	1.01
CIGENEomyV6.20102	CIGENEomyV6.38052	90.01	1431	76	4	1	1367	1367	297	1724	1750	0	2582	6	11	6-11	16445108	16592067	6p_11q	45453821	45672539	6p_11q	6p_11q	6p_11q	232405.82	1.04	0.82
CIGENEomyV6.4121	CIGENEomyV6.8692	93.8	1306	74	4	80	1381	1381	1	1303	1303	0	2476	2	3	2-3	8148748	8164803	2p_3p	17811836	17849461	2p_3p	2p_3p	2p_3p	232248.8	0.94	1
CIGENEomyV6.42555	CIGENEomyV6.45859	96.38	1300	45	2	1	1300	1300	1	1298	1298	0	2406	12	13	12-13	69576070	69598454	12q_13q	36764716	36786443	12q_13q	12q_13q	12q_13q	231890.28	1	1
CIGENEomyV6.67677	CIGENEomyV6.74334	88.46	1577	142	16	1	1564	1564	10	1559	1559	0	2619	20	23	20-23	25684719	25753492	20q_23	44375613	44469183	20q_23	20q_23	20q_23	231676.74	1	1
CIGENEomyV6.67725	CIGENEomyV6.74387	83.31	1767	289	3	438	2203	2203	1	1762	1762	0	2780	20	23	20-23	27132680	27191089	20q_23	46166000	46206526	20q_23	20q_23	20q_23	231601.8	0.8	1
CIGENEomyV6.34527	CIGENEomyV6.41191	96.52	1206	37	1	1	1206	1685	1	1201	1213	0	2399	10	12	10-12	27011281	27164886	10p_12p	30042522	30091007	10p_12p	10p_12p	10p_12p	231551.48	0.72	0.99
CIGENEomyV6.45169	CIGENEomyV6.58443	89.16	1458	150	4	1	1456	1456	435	1886	1886	0	2592	13	17	13-17	21932731	21963141	13p_17p	17726944	17759775	13p_17p	13p_17p	13p_17p	231102.72	1	0.77
CIGENEomyV6.24474	CIGENEomyV6.60208	85.22	1698	214	18	18	1704	1704	1	1672	1672	0	2704	7	17	7-17	35207612	35228856	7q_17q	62753693	62765854	7q_17q	7q_17q	7q_17q	230434.88	0.99	1
CIGENEomyV6.31386	CIGENEomyV6.70587	96.67	1260	36	4	1	1259	1259	1	1255	1255	0	2383	9	21	9-21	23572194	23797780	9p_21q	47514094	47684269	9p_21q	9p_21q	9p_21q	230364.61	1	1
CIGENEomyV6.5001	CIGENEomyV6.9587	92.58	1347	95	2	1	1344	1344	1	1345	1345	0	2483	2	3	2-3	26683142	26720376	2p_3p	36650743	36687818	2p_3p	2p_3p	2p_3p	229876.14	1	1
CIGENEomyV6.28908	CIGENEomyV6.84578	85.21	1711	202	21	1	1691	1691	179	1858	1858	0	2680	8	28	8-28	62538385	62571620	8q_28	17672273	17758258	8q_28	8q_28	8q_28	228362.8	1	0.91
CIGENEomyV6.25125	CIGENEomyV6.59480	98.9	1183	12	1	800	1982	1982	1	1182	1182	0	2309	7	17	7-17	53474865	53589432	7q_17q	44224498	44263704	7q_17q	7q_17q	7q_17q	228360.1	0.6	1
CIGENEomyV6.74988	CIGENEomyV6.82355	86.41	1472	188	4	1	1470	1470	1	1462	1462	0	2640	24	27	24-27	11542894	11610958	24_27	14535828	14574674	24_27	24_27	24_27	228122.4	1	1
CIGENEomyV6.21962	CIGENEomyV6.80764	93.07	1284	58	4	1	1284	1284	103	1355	1355	0	2445	6	26	6-26	63655520	63694861	6q_26	18757712	18798599	6q_26	6q_26	6q_26	227556.15	1	0.94
CIGENEomyV6.52855	CIGENEomyV6.69630	93.84	1282	62	9	1	1272	1272	1	1275	1275	0	2420	15	21	15-21	42071030	42085012	15q_21p	25870192	25882813	15q_21p	15q_21p	15q_21p	227092.8	1	1
CIGENEomyV6.50160	CIGENEomyV6.77864	92.38	1325	97	2	1	1323	1323	1	1323	1323	0	2458	14	25	14-25	56068080	56082721	14q_25p	28859048	28870546	14q_25p	14q_25p	14q_25p	227070.04	1	1
CIGENEomyV6.53033	CIGENEomyV6.69461	98.23	1128	20	0	1	1128	1128	1	1128	1128	0	2308	15	21	15-21	46854303	46875972	15q_21p	21521950	21543422	15q_21p	15q_21p	15q_21p	226714.84	1	1
CIGENEomyV6.28794	CIGENEomyV6.84686	98.18	1152	18	1	1	1152	1152	1	1149	1149	0	2309	8	28	8-28	59933907	60001095	8q_28	20434263	20480331	8q_28	8q_28	8q_28	226697.62	1	1
CIGENEomyV6.28741	CIGENEomyV6.84745	96.99	1197	35	1	1	1196	1314	5	1201	1201	0	2337	8	28	8-28	58122485	58398687	8q_28	22038516	22298065	8q_28	8q_28	8q_28	226665.63	0.91	1
CIGENEomyV6.4956	CIGENEomyV6.9550	94.05	1345	65	7	1	1331	1331	1	1344	1344	0	2409	2	3	2-3	25324204	25341700	2p_3p	35363145	35381142	2p_3p	2p_3p	2p_3p	226566.45	1.01	1
CIGENEomyV6.10206	CIGENEomyV6.72305	91.7	1325	97	3	1	1323	1323	1	1314	1314	0	2470	3	22	3-22	55122361	55242912	3q_22q	41114715	41235384	3q_22q	3q_22q	3q_22q	226499	1	1.01
CIGENEomyV6.65506	CIGENEomyV6.78900	96.75	1168	30	1	12	1171	1171	496	1663	1663	0	2340	19	25	19-25	39021388	39041028	19q_25q	59357384	59380894	19q_25q	19q_25q	19q_25q	226395	1	0.7
CIGENEomyV6.16862	CIGENEomyV6.40576	93.91	1247	75	1	1	1247	1694	149	1394	1402	0	2410	5	12	5-12	36016318	36105747	5p_12p	15859402	15925339	5p_12p	5p_12p	5p_12p	226323.1	0.74	0.89
CIGENEomyV6.42793	CIGENEomyV6.45934	96.1	1179	44	1	2	1180	1180	1	1177	1177	0	2347	12	13	12-13	73804351	73819439	12q_13q	37866855	37880498	12q_13q	12q_13q	12q_13q	225546.7	1	1
CIGENEomyV6.17477	CIGENEomyV6.482	86.41	1516	203	2	1	1515	1518	1	1514	1517	0	2599	5	1	1-5	51730488	51794344	1p_5q	9682502	9722140	1p_5q	1p_5q	1p_5q	224579.59	1	1
CIGENEomyV6.52926	CIGENEomyV6.69569	96.67	1293	26	2	1	1293	1318	32	1307	1308	0	2321	15	21	15-21	44173509	44195120	15q_21p	24011933	24037726	15q_21p	15q_21p	15q_21p	224371.07	0.98	0.99
CIGENEomyV6.20227	CIGENEomyV6.38177	86.37	1489	189	6	1	1482	1482	1	1482	1482	0	2593	6	11	6-11	18643143	18665059	6p_11q	47705395	47728062	6p_11q	6p_11q	6p_11q	223957.41	1	1
CIGENEomyV6.21763	CIGENEomyV6.80563	95.83	1176	27	1	1	1154	1154	1	1176	1176	0	2337	6	26	6-26	59048229	59107788	6q_26	13897534	13923271	6q_26	6q_26	6q_26	223954.71	1.02	1
CIGENEomyV6.22334	CIGENEomyV6.81135	99.18	1095	9	0	1	1095	1095	1	1095	1095	0	2256	6	26	6-26	72612875	72678216	6q_26	27969734	28015433	6q_26	6q_26	6q_26	223750.08	1	1
CIGENEomyV6.21867	CIGENEomyV6.80659	99.13	1145	9	1	11	1154	1154	229	1373	1373	0	2257	6	26	6-26	61584091	61599649	6q_26	16335909	16359440	6q_26	6q_26	6q_26	223736.41	0.99	0.83
CIGENEomyV6.10553	CIGENEomyV6.71938	99.09	1103	8	1	1	1103	1142	1	1101	1101	0	2256	3	22	3-22	64980371	65040811	3q_22q	30644241	30707700	3q_22q	3q_22q	3q_22q	223547.04	0.96	1
CIGENEomyV6.32500	CIGENEomyV6.55841	83.73	1555	220	7	1	1551	1551	5	1530	1530	0	2665	9	16	9-16	51826881	51849839	9q_16q	43020165	43051876	9q_16q	9q_16q	9q_16q	223140.45	1	1.01
CIGENEomyV6.28858	CIGENEomyV6.84629	96.55	1188	35	2	15	1200	1200	1	1184	1184	0	2311	8	28	8-28	61258006	61413521	8q_28	18946462	19050358	8q_28	8q_28	8q_28	223127.05	0.99	1
CIGENEomyV6.29142	CIGENEomyV6.84382	92.65	1279	92	1	1	1277	1277	1	1279	1279	0	2407	8	28	8-28	68510770	68618348	8q_28	11290774	11337500	8q_28	8q_28	8q_28	223008.55	1	1
CIGENEomyV6.65187	CIGENEomyV6.79214	91.11	1384	112	3	29	1412	1412	1	1373	1373	0	2447	19	25	19-25	31971710	32051972	19q_25q	66578306	66690339	19q_25q	19q_25q	19q_25q	222946.17	0.98	1.01
CIGENEomyV6.22271	CIGENEomyV6.81066	98.29	1113	19	0	1	1113	1113	1	1113	1113	0	2268	6	26	6-26	70543992	70625014	6q_26	25463652	25541938	6q_26	6q_26	6q_26	222921.72	1	1
CIGENEomyV6.17594	CIGENEomyV6.623	98.1	1108	21	0	1	1108	1108	1	1108	1108	0	2269	5	1	1-5	54515314	54598148	1p_5q	13048990	13068446	1p_5q	1p_5q	1p_5q	222588.9	1	1
CIGENEomyV6.17073	CIGENEomyV6.40328	90.9	1329	114	4	1	1327	1327	14	1337	1337	0	2441	5	12	5-12	40366482	40566804	5p_12p	11217192	11432129	5p_12p	5p_12p	5p_12p	221886.9	1	0.99
CIGENEomyV6.10720	CIGENEomyV6.71795	81	1853	234	22	1	1811	1811	1	1777	1777	0	2739	3	22	3-22	68250702	68273005	3q_22q	27316912	27390456	3q_22q	3q_22q	3q_22q	221859	1.01	1.03
CIGENEomyV6.54770	CIGENEomyV6.66737	90.72	1293	116	1	1	1293	1293	1	1289	1289	0	2441	16	20	16-20	16721882	16765445	16p_20p	3939447	3961606	16p_20p	16p_20p	16p_20p	221447.52	1	1
CIGENEomyV6.54818	CIGENEomyV6.66778	85.02	1542	215	9	1	1538	1538	1	1530	1530	0	2604	16	20	16-20	17800431	17813398	16p_20p	5065924	5081514	16p_20p	16p_20p	16p_20p	221392.08	1	1
CIGENEomyV6.17430	CIGENEomyV6.423	85.92	1541	194	6	1	1535	1535	1	1524	1524	0	2574	5	1	1-5	50716199	50930224	1p_5q	8652510	8678629	1p_5q	1p_5q	1p_5q	221158.08	1	1.01
CIGENEomyV6.12930	CIGENEomyV6.18281	84.79	1729	239	11	236	1949	1949	1	1720	1720	0	2605	4	5	4-5	25886852	25914999	4p_5q	71100467	71137890	4p_5q	4p_5q	4p_5q	220877.95	0.88	1
CIGENEomyV6.75167	CIGENEomyV6.82533	94.4	1214	61	2	1	1214	1215	20	1226	1399	0	2338	24	27	24-27	15541190	15571954	24_27	18577925	18611992	24_27	24_27	24_27	220707.2	1	0.87
CIGENEomyV6.65572	CIGENEomyV6.78817	96.42	1173	42	0	1	1173	1173	1	1173	1173	0	2282	19	25	19-25	40486626	40496152	19q_25q	57789941	57803198	19q_25q	19q_25q	19q_25q	220030.44	1	1
CIGENEomyV6.31145	CIGENEomyV6.70297	90.09	1392	128	4	1	1390	1390	1	1384	1384	0	2442	9	21	9-21	16390745	16443715	9p_21q	40213965	40269436	9p_21q	9p_21q	9p_21q	219999.78	1	1
CIGENEomyV6.3885	CIGENEomyV6.8439	98.43	1588	22	3	18	1604	1636	18	1603	1656	0	2234	2	3	2-3	5089307	5134306	2p_3p	14074116	14083141	2p_3p	2p_3p	2p_3p	219892.62	0.97	0.96
CIGENEomyV6.20554	CIGENEomyV6.38493	80.49	1886	287	7	416	2291	2291	1	1815	1815	0	2731	6	11	6-11	26460890	26510695	6p_11q	55553695	55613399	6p_11q	6p_11q	6p_11q	219818.19	0.82	1.04
CIGENEomyV6.42994	CIGENEomyV6.46325	96.55	1187	33	3	1	1186	1186	1	1180	1180	0	2274	12	13	12-13	78139858	78171457	12q_13q	44624068	44653024	12q_13q	12q_13q	12q_13q	219554.7	1	1
CIGENEomyV6.31764	CIGENEomyV6.56226	81.85	1769	272	14	25	1765	1767	25	1772	2846	0	2681	9	16	9-16	33784967	33790791	9q_16q	51302805	51340694	9q_16q	9q_16q	9q_16q	219439.85	0.99	0.62
CIGENEomyV6.30960	CIGENEomyV6.70153	82.36	1565	272	3	40	1603	1603	303	1864	1864	0	2664	9	21	9-21	11701154	11721218	9p_21q	35594584	35605924	9p_21q	9p_21q	9p_21q	219407.04	0.97	0.84
CIGENEomyV6.65150	CIGENEomyV6.79260	89.19	1388	127	8	1	1378	1378	1	1375	1375	0	2457	19	25	19-25	30510827	30544585	19q_25q	68040261	68088711	19q_25q	19q_25q	19q_25q	219139.83	1	1
CIGENEomyV6.21852	CIGENEomyV6.80644	97	1168	17	2	1	1151	1151	1	1167	1167	0	2259	6	26	6-26	61030611	61040790	6q_26	15859018	15869307	6q_26	6q_26	6q_26	219123	1.01	1
CIGENEomyV6.4143	CIGENEomyV6.8705	93.18	1291	72	7	25	1309	1309	7	1287	1287	0	2350	2	3	2-3	8411762	8422277	2p_3p	18098002	18111144	2p_3p	2p_3p	2p_3p	218973	0.98	1
CIGENEomyV6.12575	CIGENEomyV6.17934	93.88	1226	71	1	1	1226	2310	1	1222	1228	0	2332	4	5	4-5	16381607	16435109	4p_5q	61842951	61921493	4p_5q	4p_5q	4p_5q	218928.16	0.53	1
CIGENEomyV6.12725	CIGENEomyV6.18075	93.89	1194	68	3	1	1193	1193	1	1190	1190	0	2326	4	5	4-5	20525164	20598730	4p_5q	65945624	66059890	4p_5q	4p_5q	4p_5q	218388.14	1	1
CIGENEomyV6.28652	CIGENEomyV6.84775	95.3	1191	52	2	1	1187	1187	1	1191	1191	0	2291	8	28	8-28	56369389	56381532	8q_28	23026343	23033696	8q_28	8q_28	8q_28	218332.3	1	1
CIGENEomyV6.17782	CIGENEomyV6.869	92.03	1255	99	1	1	1255	1255	1	1254	1254	0	2372	5	1	1-5	58424982	58451765	1p_5q	18042779	18075078	1p_5q	1p_5q	1p_5q	218295.16	1	1
CIGENEomyV6.42421	CIGENEomyV6.45724	96.67	1412	42	2	1	1412	1412	1	1407	1407	0	2256	12	13	12-13	66594408	66611505	12q_13q	33706171	33724508	12q_13q	12q_13q	12q_13q	218087.52	1	1
CIGENEomyV6.16917	CIGENEomyV6.40499	97.23	1119	9	1	16	1112	1112	2	1120	1120	0	2243	5	12	5-12	37349667	37387210	5p_12p	14292021	14356078	5p_12p	5p_12p	5p_12p	218086.89	1.01	1
CIGENEomyV6.16900	CIGENEomyV6.40521	91.39	1277	60	5	24	1286	1286	25	1265	1265	0	2377	5	12	5-12	37026118	37140353	5p_12p	14550744	14694988	5p_12p	5p_12p	5p_12p	217234.03	0.99	1.01
CIGENEomyV6.17617	CIGENEomyV6.635	88.34	1467	128	13	1	1466	1469	1	1425	1431	0	2456	5	1	1-5	54917292	54984339	1p_5q	13336351	13386053	1p_5q	1p_5q	1p_5q	216963.04	0.99	1.02
CIGENEomyV6.20275	CIGENEomyV6.38216	91.63	1303	94	8	1	1301	1301	1	1290	1290	0	2365	6	11	6-11	19624300	19660905	6p_11q	48623510	48674285	6p_11q	6p_11q	6p_11q	216704.95	1	1
CIGENEomyV6.53513	CIGENEomyV6.68963	99.05	1056	10	0	96	1151	1153	1	1056	1058	0	2187	15	21	15-21	56390133	56436335	15q_21p	11663537	11715025	15q_21p	15q_21p	15q_21p	216622.35	0.92	1
CIGENEomyV6.21499	CIGENEomyV6.80286	90.03	1435	66	7	1	1400	1400	69	1461	1461	0	2402	6	26	6-26	51127848	51207557	6q_26	6068058	6099787	6q_26	6q_26	6q_26	216252.06	1.02	0.98
CIGENEomyV6.36885	CIGENEomyV6.51917	84.2	1658	211	20	194	1826	1826	1	1632	1632	0	2567	11	15	11-15	11729781	11801753	11p_15p	12827760	12906201	11p_15p	11p_15p	11p_15p	216141.4	0.9	1
CIGENEomyV6.20498	CIGENEomyV6.38426	90.42	1367	131	0	1	1367	1367	1	1367	1367	0	2388	6	11	6-11	24806382	24862294	6p_11q	53840329	53890781	6p_11q	6p_11q	6p_11q	215922.96	1	1
CIGENEomyV6.20478	CIGENEomyV6.38404	90.49	1357	123	3	1	1351	1351	1	1357	1357	0	2386	6	11	6-11	24360618	24378737	6p_11q	53353460	53371147	6p_11q	6p_11q	6p_11q	215909.14	1	1
CIGENEomyV6.42408	CIGENEomyV6.45708	95.49	1153	52	0	340	1492	1492	14	1166	1166	0	2253	12	13	12-13	66319076	66362580	12q_13q	33441039	33470260	12q_13q	12q_13q	12q_13q	215138.97	0.77	0.99
CIGENEomyV6.22222	CIGENEomyV6.81010	99.81	1041	2	0	1	1041	1041	1	1041	1041	0	2154	6	26	6-26	69407943	69440958	6q_26	24318436	24351663	6q_26	6q_26	6q_26	214990.74	1	1
CIGENEomyV6.53320	CIGENEomyV6.69158	97.33	1124	30	0	1	1124	1124	1	1124	1124	0	2206	15	21	15-21	52623132	52646933	15q_21p	15399670	15429514	15q_21p	15q_21p	15q_21p	214709.98	1	1
CIGENEomyV6.4674	CIGENEomyV6.9243	96.97	1090	33	0	1	1090	1110	1	1090	1090	0	2214	2	3	2-3	18722708	18780736	2p_3p	28618369	28690354	2p_3p	2p_3p	2p_3p	214691.58	0.98	1
CIGENEomyV6.53356	CIGENEomyV6.69141	98.97	1065	11	0	1	1065	1068	1	1065	1177	0	2169	15	21	15-21	53129491	53164026	15q_21p	14933189	14972237	15q_21p	15q_21p	15q_21p	214665.93	1	0.9
CIGENEomyV6.12719	CIGENEomyV6.18069	94.68	1221	58	2	9	1222	1222	1	1221	1221	0	2265	4	5	4-5	20455520	20490184	4p_5q	65891655	65906919	4p_5q	4p_5q	4p_5q	214450.2	1	1
CIGENEomyV6.17426	CIGENEomyV6.421	88.21	1340	143	1	938	2277	2561	1	1325	1325	0	2431	5	1	1-5	50642463	50670295	1p_5q	8623999	8649398	1p_5q	1p_5q	1p_5q	214438.51	0.52	1.01
CIGENEomyV6.42433	CIGENEomyV6.45740	98.59	1067	15	0	1	1067	1103	1	1067	1067	0	2175	12	13	12-13	66775585	66804522	12q_13q	33883999	33913185	12q_13q	12q_13q	12q_13q	214433.25	0.97	1
CIGENEomyV6.48905	CIGENEomyV6.62526	89.1	1376	131	6	1	1361	1377	1	1372	1389	0	2406	14	18	14-18	27567282	27753010	14p_18q	34040866	34077876	14p_18q	14p_18q	14p_18q	214374.6	0.99	0.99
CIGENEomyV6.50397	CIGENEomyV6.78099	96.94	1111	29	2	1	1106	1106	1	1111	1111	0	2210	14	25	14-25	62845007	62928104	14q_25p	36999637	37077835	14q_25p	14q_25p	14q_25p	214237.4	1	1
CIGENEomyV6.44980	CIGENEomyV6.58204	91.57	1293	102	3	1	1292	1544	348	1634	1651	0	2334	13	17	13-17	17865867	17881818	13p_17p	13503412	13524817	13p_17p	13p_17p	13p_17p	213724.38	0.84	0.78
CIGENEomyV6.44848	CIGENEomyV6.58081	92.72	1333	97	0	1	1333	1333	661	1993	1993	0	2303	13	17	13-17	15650375	15703690	13p_17p	11429531	11481934	13p_17p	13p_17p	13p_17p	213534.16	1	0.67
CIGENEomyV6.34279	CIGENEomyV6.41451	90.53	1320	107	2	1	1302	1303	122	1441	1443	0	2355	10	12	10-12	18966128	19073234	10p_12p	38348988	38634880	10p_12p	10p_12p	10p_12p	213198.15	1.01	0.91
CIGENEomyV6.21750	CIGENEomyV6.80553	95.92	1177	43	3	716	1889	1889	7	1181	1181	0	2220	6	26	6-26	58668981	58828967	6q_26	13655578	13693838	6q_26	6q_26	6q_26	212942.4	0.62	0.99
CIGENEomyV6.13119	CIGENEomyV6.18593	83.85	1585	220	13	1	1568	1568	1	1566	1566	0	2538	4	5	4-5	33238643	33261197	4p_5q	78623120	78644570	4p_5q	4p_5q	4p_5q	212811.3	1	1
CIGENEomyV6.23776	CIGENEomyV6.61801	91.19	1362	100	10	1	1352	1462	184	1535	1539	0	2330	7	18	7-18	14226644	14318682	7p_18p	15973734	16076302	7p_18p	7p_18p	7p_18p	212472.7	0.92	0.88
CIGENEomyV6.13852	CIGENEomyV6.27081	81.02	1649	270	16	1052	2681	2681	1	1625	1625	0	2621	4	8	4-8	55259479	55283497	4q_8p	13376219	13385062	4q_8p	4q_8p	4q_8p	212353.42	0.61	1
CIGENEomyV6.45372	CIGENEomyV6.58510	96.78	1087	34	1	1	1086	1086	1	1087	1087	0	2193	13	17	13-17	26535460	26575986	13p_17p	19369160	19406859	13p_17p	13p_17p	13p_17p	212238.54	1	1
CIGENEomyV6.20418	CIGENEomyV6.38346	93.54	1222	48	6	1	1210	1481	2	1204	1205	0	2268	6	11	6-11	22970709	23000243	6p_11q	51979865	52003901	6p_11q	6p_11q	6p_11q	212148.72	0.82	1.01
CIGENEomyV6.23353	CIGENEomyV6.61507	100	1026	0	0	1	1026	1026	1	1026	1026	0	2121	7	18	7-18	6392172	6597236	7p_18p	9862948	9915536	7p_18p	7p_18p	7p_18p	212100	1	1
CIGENEomyV6.49002	CIGENEomyV6.62426	85.34	1453	201	9	1	1451	1451	1	1443	1443	0	2482	14	18	14-18	29461716	29477427	14p_18q	32283292	32311470	14p_18q	14p_18q	14p_18q	211813.88	1	1
CIGENEomyV6.4575	CIGENEomyV6.9144	97.38	1107	29	0	1	1107	1107	1	1107	1107	0	2173	2	3	2-3	16948368	17074197	2p_3p	26581676	26661909	2p_3p	2p_3p	2p_3p	211606.74	1	1
CIGENEomyV6.34684	CIGENEomyV6.40975	88.2	1364	148	7	1	1357	1357	1	1358	1358	0	2398	10	12	10-12	31609127	31642595	10p_12p	25562743	25644623	10p_12p	10p_12p	10p_12p	211503.6	1	1
CIGENEomyV6.45091	CIGENEomyV6.58323	94.66	1179	62	1	1	1179	1181	1	1178	1180	0	2234	13	17	13-17	20071817	20087111	13p_17p	15725548	15740167	13p_17p	13p_17p	13p_17p	211470.44	1	1
CIGENEomyV6.17560	CIGENEomyV6.589	87.62	1405	170	4	2	1403	1403	1	1404	1404	0	2410	5	1	1-5	53866767	53942539	1p_5q	12245628	12314528	1p_5q	1p_5q	1p_5q	211164.2	1	1
CIGENEomyV6.31115	CIGENEomyV6.70280	87.96	1354	156	3	1	1351	1770	243	1592	1592	0	2400	9	21	9-21	14629296	14700225	9p_21q	38554164	38614069	9p_21q	9p_21q	9p_21q	211104	0.76	0.85
CIGENEomyV6.16927	CIGENEomyV6.40485	95.91	1125	46	0	1	1125	1292	1	1125	1125	0	2201	5	12	5-12	37517948	37557721	5p_12p	14102263	14118763	5p_12p	5p_12p	5p_12p	211097.91	0.87	1
CIGENEomyV6.31806	CIGENEomyV6.56200	85.87	1543	142	7	353	1851	1851	1	1511	1511	0	2456	9	16	9-16	34315550	34425462	9q_16q	50693831	50763796	9q_16q	9q_16q	9q_16q	210896.72	0.83	1.02
CIGENEomyV6.32425	CIGENEomyV6.55913	91.25	1452	113	6	241	1685	1691	1	1445	1450	0	2308	9	16	9-16	50596157	50714126	9q_16q	44077663	44117998	9q_16q	9q_16q	9q_16q	210605	0.86	1
CIGENEomyV6.21088	CIGENEomyV6.39090	85.87	1507	172	13	1	1498	1509	1	1475	1574	0	2447	6	11	6-11	39149369	39185829	6p_11q	69424556	69455139	6p_11q	6p_11q	6p_11q	210123.89	0.99	0.95
CIGENEomyV6.32670	CIGENEomyV6.55668	98.19	1047	19	0	1	1047	1047	29	1075	1075	0	2138	9	16	9-16	55982920	56025978	9q_16q	39441622	39482034	9q_16q	9q_16q	9q_16q	209930.22	1	0.97
CIGENEomyV6.28640	CIGENEomyV6.84779	87.5	1448	138	18	1	1418	1418	96	1530	1530	0	2392	8	28	8-28	56229289	56269533	8q_28	23095966	23187050	8q_28	8q_28	8q_28	209300	1.01	0.93
CIGENEomyV6.1082	CIGENEomyV6.5900	96.62	1125	38	0	1	1125	1246	129	1253	1253	0	2162	1	2	1-2	23496579	23566150	1p_2q	52890154	53034461	1p_2q	1p_2q	1p_2q	208892.44	0.9	0.9
CIGENEomyV6.65337	CIGENEomyV6.79050	94.33	1200	62	3	1	1197	1199	1	1197	1198	0	2212	19	25	19-25	35835857	35871075	19q_25q	62501213	62541352	19q_25q	19q_25q	19q_25q	208657.96	1	1
CIGENEomyV6.34762	CIGENEomyV6.40871	97.24	1085	25	2	31	1114	1114	1	1081	1081	0	2144	10	12	10-12	33285553	33369497	10p_12p	23788954	23860903	10p_12p	10p_12p	10p_12p	208482.56	0.97	1
CIGENEomyV6.10012	CIGENEomyV6.71406	92.18	1241	89	5	1	1238	1988	1	1236	1236	0	2261	3	22	3-22	50581385	50854999	3q_22p	16600149	16785341	3q_22p	3q_22p	3q_22p	208418.98	0.62	1
CIGENEomyV6.53438	CIGENEomyV6.69034	99.51	1026	5	0	1	1026	1031	198	1223	1242	0	2093	15	21	15-21	54659872	54727352	15q_21p	13147051	13369772	15q_21p	15q_21p	15q_21p	208274.43	1	0.83
CIGENEomyV6.74619	CIGENEomyV6.81940	97.86	1076	21	1	1	1074	1074	1	1076	1076	0	2125	24	27	24-27	3614348	3641350	24_27	5433606	5456476	24_27	24_27	24_27	207952.5	1	1
CIGENEomyV6.28387	CIGENEomyV6.85021	97.01	1104	30	2	1	1103	1103	1	1102	1102	0	2140	8	28	8-28	49693233	49701484	8q_28	29541354	29599251	8q_28	8q_28	8q_28	207601.4	1	1
CIGENEomyV6.50072	CIGENEomyV6.77784	91.04	1250	88	4	1	1233	1233	1	1243	1243	0	2279	14	25	14-25	54026336	54033360	14q_25p	26775947	26782775	14q_25p	14q_25p	14q_25p	207480.16	1.01	1
CIGENEomyV6.31247	CIGENEomyV6.70419	80.19	1787	259	25	1	1719	1723	148	1907	1910	0	2587	9	21	9-21	18904338	18929919	9p_21q	42775331	42804057	9p_21q	9p_21q	9p_21q	207451.53	1.02	0.92
CIGENEomyV6.34880	CIGENEomyV6.40738	94.46	1192	65	1	1	1191	1191	4	1195	1195	0	2196	10	12	10-12	37578835	37671841	10p_12p	19481508	19632098	10p_12p	10p_12p	10p_12p	207434.16	1	1
CIGENEomyV6.32713	CIGENEomyV6.55622	84.9	1497	194	14	1	1474	1474	4	1491	1491	0	2443	9	16	9-16	56698073	56729564	9q_16q	38729559	38780761	9q_16q	9q_16q	9q_16q	207410.7	1.01	0.99
CIGENEomyV6.2331	CIGENEomyV6.72870	94.58	1273	49	5	1	1262	1262	1	1264	1264	0	2191	1	23	1-23	58416269	58440850	1q_23	2928798	2945911	1q_23	1q_23	1q_23	207224.78	1	1
CIGENEomyV6.20018	CIGENEomyV6.37947	97.65	1066	25	0	1	1066	1066	1	1066	1066	0	2122	6	11	6-11	14584571	14599011	6p_11q	43316686	43341526	6p_11q	6p_11q	6p_11q	207213.3	1	1
CIGENEomyV6.34804	CIGENEomyV6.40815	94.55	1138	55	1	1	1138	1138	1	1131	1131	0	2190	10	12	10-12	34859840	34879470	10p_12p	22369884	22385587	10p_12p	10p_12p	10p_12p	207064.5	1	1.01
CIGENEomyV6.25587	CIGENEomyV6.59020	83	1629	179	11	1	1620	1620	1	1540	1540	0	2494	7	17	7-17	63679640	63714675	7q_17q	33363805	33400621	7q_17q	7q_17q	7q_17q	207002	1	1.05
CIGENEomyV6.51055	CIGENEomyV6.76582	98.65	1037	14	0	1	1037	1037	3	1039	1039	0	2097	14	25	14-25	77228032	77489195	14q_25p	3841728	3959335	14q_25p	14q_25p	14q_25p	206869.05	1	1
CIGENEomyV6.44703	CIGENEomyV6.57982	97.4	1115	29	0	709	1823	1823	136	1250	1250	0	2120	13	17	13-17	11960871	11983134	13p_17p	8728854	8750138	13p_17p	13p_17p	13p_17p	206488	0.61	0.89
CIGENEomyV6.42446	CIGENEomyV6.45755	98.42	1013	16	0	1	1013	1014	1	1013	1207	0	2098	12	13	12-13	67167939	67256268	12q_13q	34278117	34380340	12q_13q	12q_13q	12q_13q	206485.16	1	0.84
CIGENEomyV6.4407	CIGENEomyV6.8961	86.55	1554	115	13	16	1484	1484	6	1550	1550	0	2378	2	3	2-3	13783845	13842995	2p_3p	23536768	23605921	2p_3p	2p_3p	2p_3p	205815.9	1.04	0.99
CIGENEomyV6.75031	CIGENEomyV6.82409	89.18	1395	78	7	1	1332	1332	213	1597	1597	0	2306	24	27	24-27	12392458	12456664	24_27	15368698	15473233	24_27	24_27	24_27	205649.08	1.04	0.87
CIGENEomyV6.10436	CIGENEomyV6.72020	92.44	1164	57	2	1	1162	1164	1	1135	1138	0	2224	3	22	3-22	61974277	62125587	3q_22q	33881900	34018870	3q_22q	3q_22q	3q_22q	205586.56	1	1.02
CIGENEomyV6.75258	CIGENEomyV6.82634	88.2	1491	92	10	9	1493	1493	1	1413	1413	0	2329	24	27	24-27	17521828	17596101	24_27	20771074	20856497	24_27	24_27	24_27	205417.8	0.99	1.05
CIGENEomyV6.74944	CIGENEomyV6.82320	87.5	1328	132	5	7	1314	1314	1	1314	1314	0	2345	24	27	24-27	10710554	10723898	24_27	13674307	13688072	24_27	24_27	24_27	205187.5	1.01	1.01
CIGENEomyV6.48994	CIGENEomyV6.62429	98.11	1061	12	1	417	1477	1477	1	1053	1566	0	2087	14	18	14-18	29399886	29421671	14p_18q	32318504	32341111	14p_18q	14p_18q	14p_18q	204755.57	0.72	0.68
CIGENEomyV6.48875	CIGENEomyV6.62590	95.63	1075	47	0	1	1075	1076	1	1075	1077	0	2138	14	18	14-18	26558147	26674251	14p_18q	35166197	35296311	14p_18q	14p_18q	14p_18q	204456.94	1	1
CIGENEomyV6.16258	CIGENEomyV6.86296	81.89	1673	270	12	1	1644	1652	914	2582	2584	0	2493	5	29	5-29	21068570	21147375	5p_29	13507443	13691412	5p_29	5p_29	5p_29	204151.77	1.01	0.64
CIGENEomyV6.75030	CIGENEomyV6.82408	87.29	1314	153	6	204	1505	1505	1	1312	1312	0	2337	24	27	24-27	12308927	12396046	24_27	15326744	15376000	24_27	24_27	24_27	203996.73	0.87	1
CIGENEomyV6.34958	CIGENEomyV6.86758	90.2	1245	117	4	1	1243	1243	1	1242	1242	0	2260	10	29	10-29	39427671	39444633	10p_29	27937889	27961662	10p_29	10p_29	10p_29	203852	1	1
CIGENEomyV6.37563	CIGENEomyV6.52456	95.97	1093	41	1	1	1093	1093	1	1090	1090	0	2123	11	15	11-15	30404507	30444955	11p_15p	27320028	27369233	11p_15p	11p_15p	11p_15p	203744.31	1	1
CIGENEomyV6.16456	CIGENEomyV6.86443	95.75	1059	45	0	1	1059	1059	1	1059	1059	0	2126	5	29	5-29	25778777	25832111	5p_29	18624230	18675024	5p_29	5p_29	5p_29	203564.5	1	1
CIGENEomyV6.20531	CIGENEomyV6.38455	94.32	1267	65	3	1	1266	1266	1	1261	1261	0	2153	6	11	6-11	25732916	25754384	6p_11q	54809920	54830255	6p_11q	6p_11q	6p_11q	203070.96	1	1
CIGENEomyV6.2781	CIGENEomyV6.73297	88.56	1250	138	3	1	1248	1248	1	1247	1247	0	2292	1	23	1-23	69934452	69997152	1q_23	14283996	14355792	1q_23	1q_23	1q_23	202979.52	1	1
CIGENEomyV6.45380	CIGENEomyV6.58523	90.84	1288	105	6	1	1282	1282	1	1281	1281	0	2231	13	17	13-17	26811768	26877367	13p_17p	19712443	19764124	13p_17p	13p_17p	13p_17p	202664.04	1	1
CIGENEomyV6.50264	CIGENEomyV6.77945	91.07	1232	73	4	1	1195	1195	1	1232	1232	0	2225	14	25	14-25	58188428	58236758	14q_25p	31232908	31257970	14q_25p	14q_25p	14q_25p	202630.75	1.03	1
CIGENEomyV6.20537	CIGENEomyV6.38461	98.52	1015	15	0	1	1015	1048	111	1125	1731	0	2055	6	11	6-11	25820478	25968578	6p_11q	54896720	55005576	6p_11q	6p_11q	6p_11q	202458.6	0.97	0.59
CIGENEomyV6.21634	CIGENEomyV6.80464	95.98	1145	42	1	1	1141	1141	1	1145	1145	0	2107	6	26	6-26	54843899	54878731	6q_26	11242438	11290506	6q_26	6q_26	6q_26	202229.86	1	1
CIGENEomyV6.4934	CIGENEomyV6.9527	95.47	1171	47	3	1	1169	1169	1	1167	1167	0	2115	2	3	2-3	24495602	24536467	2p_3p	34537378	34581005	2p_3p	2p_3p	2p_3p	201919.05	1	1
CIGENEomyV6.74768	CIGENEomyV6.82141	97.95	1074	20	2	12	1084	1084	12	1084	1084	0	2061	24	27	24-27	6861549	6923356	24_27	9637646	9663151	24_27	24_27	24_27	201874.95	0.99	0.99
CIGENEomyV6.16745	CIGENEomyV6.40675	88.37	1350	119	7	1	1328	1328	1	1334	1405	0	2284	5	12	5-12	33688960	33741503	5p_12p	18238281	18282383	5p_12p	5p_12p	5p_12p	201837.08	1.01	0.96
CIGENEomyV6.37708	CIGENEomyV6.52332	91.85	1227	95	3	1	1226	1226	1	1223	1223	0	2196	11	15	11-15	34388057	34498242	11p_15p	23707989	23815649	11p_15p	11p_15p	11p_15p	201702.6	1	1
CIGENEomyV6.31532	CIGENEomyV6.56517	97.06	1054	17	2	1	1045	1046	1	1049	1124	0	2078	9	16	9-16	27916602	28008386	9q_16q	57308643	57405910	9q_16q	9q_16q	9q_16q	201690.68	1.01	0.94
CIGENEomyV6.1740	CIGENEomyV6.6563	82.72	1597	224	15	1	1566	1566	1	1576	1576	0	2434	1	2	1-2	40793217	40863222	1p_2q	70063627	70118766	1p_2q	1p_2q	1p_2q	201340.48	1.01	1
CIGENEomyV6.32950	CIGENEomyV6.55432	94.02	1121	65	1	2	1120	1120	1118	2238	2238	0	2141	9	16	9-16	60826256	60858338	9q_16q	34852473	34905532	9q_16q	9q_16q	9q_16q	201296.82	1	0.5
CIGENEomyV6.28883	CIGENEomyV6.84600	94.77	1089	54	1	1	1089	1089	1	1086	1086	0	2124	8	28	8-28	61937705	61987051	8q_28	18268986	18353985	8q_28	8q_28	8q_28	201291.48	1	1
CIGENEomyV6.13934	CIGENEomyV6.27183	92.53	1138	77	3	1	1138	1138	1	1130	1130	0	2175	4	8	4-8	57708708	57720675	4q_8p	15904726	15913058	4q_8p	4q_8p	4q_8p	201252.75	1	1
CIGENEomyV6.12540	CIGENEomyV6.17902	91.16	1255	90	4	1	1239	1239	1	1250	1250	0	2205	4	5	4-5	15654331	15691738	4p_5q	61178613	61219758	4p_5q	4p_5q	4p_5q	201007.8	1.01	1
CIGENEomyV6.4869	CIGENEomyV6.9462	98.68	986	13	0	1	986	986	1	986	986	0	2033	2	3	2-3	23092946	23209772	2p_3p	33143631	33269602	2p_3p	2p_3p	2p_3p	200616.44	1	1
CIGENEomyV6.28602	CIGENEomyV6.84810	86.72	1408	110	12	1	1380	1380	1	1359	1359	0	2312	8	28	8-28	54675653	54932228	8q_28	24470871	24687176	8q_28	8q_28	8q_28	200496.64	1.01	1.03
CIGENEomyV6.32466	CIGENEomyV6.55884	94.49	1324	61	3	1	1323	1352	1	1313	1431	0	2120	9	16	9-16	51258857	51317490	9q_16q	43549705	43596760	9q_16q	9q_16q	9q_16q	200318.8	0.98	0.92
CIGENEomyV6.12927	CIGENEomyV6.18278	83.67	1513	198	17	26	1514	1528	1	1488	1538	0	2393	4	5	4-5	25798272	25852063	4p_5q	71039295	71077555	4p_5q	4p_5q	4p_5q	200222.31	0.98	0.97
CIGENEomyV6.12346	CIGENEomyV6.5666	92.3	1143	86	2	1	1142	1142	1	1142	1142	0	2165	4	2	2-4	10822352	10875471	2q_4p	46056137	46120165	2q_4p	2q_4p	2q_4p	199829.5	1	1
CIGENEomyV6.44732	CIGENEomyV6.57962	98.43	1020	15	1	1	1020	1020	1	1019	1019	0	2029	13	17	13-17	12579273	12607143	13p_17p	8232860	8265445	13p_17p	13p_17p	13p_17p	199714.47	1	1
CIGENEomyV6.22181	CIGENEomyV6.80964	95.74	1102	23	3	1	1078	1078	1	1102	1102	0	2084	6	26	6-26	67911170	67955954	6q_26	22723735	22765152	6q_26	6q_26	6q_26	199522.16	1.02	1
CIGENEomyV6.36027	CIGENEomyV6.64272	98.56	1044	13	1	1	1042	1042	1	1044	1044	0	2023	10	19	10-19	63318497	63410231	10q_19p	8782791	8873887	10q_19p	10q_19p	10q_19p	199386.88	1	1
CIGENEomyV6.32340	CIGENEomyV6.55981	86.45	1373	163	10	1	1359	1359	1	1364	1364	0	2305	9	16	9-16	48694832	48755511	9q_16q	45806178	45857652	9q_16q	9q_16q	9q_16q	199267.25	1	1
CIGENEomyV6.16801	CIGENEomyV6.40624	84.69	1378	188	10	1	1368	1368	1	1365	1365	0	2352	5	12	5-12	34679061	34710478	5p_12p	17235565	17255842	5p_12p	5p_12p	5p_12p	199190.88	1	1
CIGENEomyV6.25502	CIGENEomyV6.59108	95.72	1052	45	0	1	1052	1052	1	1052	1052	0	2078	7	17	7-17	62438737	62459555	7q_17q	34995634	35020993	7q_17q	7q_17q	7q_17q	198906.16	1	1
CIGENEomyV6.17651	CIGENEomyV6.669	88.02	1260	117	3	1	1228	1228	28	1285	1285	0	2254	5	1	1-5	55514019	55547311	1p_5q	13955661	14222477	1p_5q	1p_5q	1p_5q	198397.08	1.02	0.98
CIGENEomyV6.34450	CIGENEomyV6.41285	82.21	1518	192	7	456	1942	1963	5	1475	1488	0	2409	10	12	10-12	24224023	24281412	10p_12p	33109424	33142402	10p_12p	10p_12p	10p_12p	198043.89	0.77	1.02
CIGENEomyV6.75125	CIGENEomyV6.82493	88.74	1243	136	3	1	1243	1720	1	1239	1250	0	2231	24	27	24-27	14404174	14538512	24_27	17442003	17478228	24_27	24_27	24_27	197978.94	0.72	0.99
CIGENEomyV6.20162	CIGENEomyV6.38107	96.61	1031	34	1	1	1030	1030	1	1031	1031	0	2049	6	11	6-11	17583882	17600687	6p_11q	46644497	46668044	6p_11q	6p_11q	6p_11q	197953.89	1	1
CIGENEomyV6.16585	CIGENEomyV6.86579	99.89	950	1	0	1	950	950	1	950	950	0	1981	5	29	5-29	29845094	29895002	5p_29	23131084	23161934	5p_29	5p_29	5p_29	197882.09	1	1
CIGENEomyV6.12647	CIGENEomyV6.17992	96.73	1008	33	0	1	1008	1008	1	1008	1008	0	2044	4	5	4-5	17802966	17992425	4p_5q	63238236	63444922	4p_5q	4p_5q	4p_5q	197716.12	1	1
CIGENEomyV6.74602	CIGENEomyV6.81917	92.61	1164	71	5	1	1154	1154	311	1469	1469	0	2134	24	27	24-27	2828812	2900362	24_27	4614086	4682321	24_27	24_27	24_27	197629.74	1	0.79
CIGENEomyV6.28802	CIGENEomyV6.84678	93.53	1082	66	1	1	1078	1078	1	1082	1082	0	2113	8	28	8-28	60137989	60147956	8q_28	20254066	20265661	8q_28	8q_28	8q_28	197628.89	1	1
CIGENEomyV6.23695	CIGENEomyV6.61744	98.31	1003	14	1	1	1003	1015	1	1000	1105	0	2010	7	18	7-18	12042867	12076572	7p_18p	13942140	13993412	7p_18p	7p_18p	7p_18p	197603.1	0.99	0.91
CIGENEomyV6.54671	CIGENEomyV6.67316	89.27	1211	104	6	15	1223	1223	1	1187	1187	0	2213	16	20	16-20	14867533	14879434	16p_20p	17436577	17474778	16p_20p	16p_20p	16p_20p	197554.51	0.99	1.02
CIGENEomyV6.42667	CIGENEomyV6.46050	94.47	1194	36	2	1	1164	1164	1	1194	1194	0	2091	12	13	12-13	71694845	71709896	12q_13q	39872323	39888185	12q_13q	12q_13q	12q_13q	197536.77	1.02	1
CIGENEomyV6.75547	CIGENEomyV6.82906	93.34	1081	72	0	3	1083	1084	2	1082	1143	0	2112	24	27	24-27	24545509	24568242	24_27	27660283	27692879	24_27	24_27	24_27	197134.08	1	0.95
CIGENEomyV6.34803	CIGENEomyV6.40816	82.3	1514	162	12	1	1425	1425	1	1497	1497	0	2393	10	12	10-12	34833191	34853771	10p_12p	22386443	22413293	10p_12p	10p_12p	10p_12p	196943.9	1.05	1
CIGENEomyV6.2302	CIGENEomyV6.72836	93.98	1130	56	5	1	1128	1128	1	1120	1120	0	2092	1	23	1-23	57775560	57798016	1q_23	2184675	2229982	1q_23	1q_23	1q_23	196606.16	1	1
CIGENEomyV6.42534	CIGENEomyV6.45839	96.46	1018	25	2	1	1018	1018	1	1007	1007	0	2038	12	13	12-13	69054254	69068154	12q_13q	36244960	36255135	12q_13q	12q_13q	12q_13q	196585.48	1	1.01
CIGENEomyV6.20479	CIGENEomyV6.38406	97.75	977	22	0	1	977	977	1	977	977	0	2010	6	11	6-11	24408412	24464899	6p_11q	53372600	53425736	6p_11q	6p_11q	6p_11q	196477.5	1	1
CIGENEomyV6.19943	CIGENEomyV6.37891	94.74	1083	52	3	1	1080	1081	1	1081	1097	0	2070	6	11	6-11	12742957	12787449	6p_11q	41120937	41182679	6p_11q	6p_11q	6p_11q	196111.8	1	0.98
CIGENEomyV6.28732	CIGENEomyV6.84755	94.22	1124	48	7	2	1115	1115	200	1316	1316	0	2078	8	28	8-28	57675035	57766399	8q_28	22597457	22684014	8q_28	8q_28	8q_28	195789.16	1	0.85
CIGENEomyV6.23894	CIGENEomyV6.61927	93.52	1111	63	3	1	1102	1102	1	1111	1111	0	2092	7	18	7-18	16723681	16815406	7p_18p	18651209	18723035	7p_18p	7p_18p	7p_18p	195643.84	1.01	1
CIGENEomyV6.34940	CIGENEomyV6.86735	84.12	1499	178	21	1	1450	1453	1	1488	1495	0	2322	10	29	10-29	38821608	38830607	10p_29	27257346	27280348	10p_29	10p_29	10p_29	195326.64	1.02	0.99
CIGENEomyV6.4450	CIGENEomyV6.9014	92.45	1139	58	3	1	1139	1139	61	1171	1171	0	2110	2	3	2-3	14730734	14742799	2p_3p	24482002	24493906	2p_3p	2p_3p	2p_3p	195069.5	1	0.97
CIGENEomyV6.4484	CIGENEomyV6.9048	96.26	1122	37	3	38	1157	1157	1	1119	1119	0	2025	2	3	2-3	15291763	15342681	2p_3p	25004799	25051250	2p_3p	2p_3p	2p_3p	194926.5	0.97	1
CIGENEomyV6.36067	CIGENEomyV6.64231	97.62	1051	21	3	1	1047	1047	1	1051	1051	0	1993	10	19	10-19	64279964	64290495	10q_19p	7814634	7881221	10q_19p	10q_19p	10q_19p	194556.66	1	1
CIGENEomyV6.11344	CIGENEomyV6.71228	92.96	1108	78	0	1	1108	1108	3	1110	1110	0	2092	3	22	3-22	79649389	79679316	3q_22p	12216174	12236797	3q_22p	3q_22p	3q_22p	194472.32	1	1
CIGENEomyV6.74932	CIGENEomyV6.82309	93.24	1183	55	9	1	1166	1177	1	1175	1594	0	2084	24	27	24-27	10496244	10527725	24_27	13419386	13445368	24_27	24_27	24_27	194312.16	1	0.74
CIGENEomyV6.11181	CIGENEomyV6.71119	91.57	1162	49	3	275	1388	1388	1	1161	1161	0	2122	3	22	3-22	76305354	76349135	3q_22p	8901444	9024924	3q_22p	3q_22p	3q_22p	194311.54	0.84	1
CIGENEomyV6.24522	CIGENEomyV6.60153	95.63	1030	44	1	1	1030	1030	1	1029	1029	0	2026	7	17	7-17	36159697	36331351	7q_17q	61511182	61735761	7q_17q	7q_17q	7q_17q	193746.38	1	1
CIGENEomyV6.22206	CIGENEomyV6.80987	99.27	954	7	0	1	954	954	1	954	954	0	1951	6	26	6-26	68789721	68802751	6q_26	23650322	23666747	6q_26	6q_26	6q_26	193675.77	1	1
CIGENEomyV6.2631	CIGENEomyV6.73137	91.36	1181	96	4	1	1181	1181	1	1175	1175	0	2116	1	23	1-23	65387580	65467526	1q_23	9934133	10005968	1q_23	1q_23	1q_23	193317.76	1	1
CIGENEomyV6.30615	CIGENEomyV6.69862	85.6	1319	173	5	9	1325	1344	56	1359	1360	0	2256	9	21	9-21	6618943	6636338	9p_21q	31183230	31209566	9p_21q	9p_21q	9p_21q	193113.6	0.98	0.97
CIGENEomyV6.50830	CIGENEomyV6.76770	90.07	1269	117	3	187	1455	1455	1	1260	1260	0	2144	14	25	14-25	72954932	72967618	14q_25p	7614353	7638385	14q_25p	14q_25p	14q_25p	193110.08	0.87	1
CIGENEomyV6.67911	CIGENEomyV6.73735	93.36	1069	71	0	1	1069	1080	1	1069	1429	0	2068	20	23	20-23	32273742	32311824	20q_23	29169618	29197551	20q_23	20q_23	20q_23	193068.48	0.99	0.75
CIGENEomyV6.42734	CIGENEomyV6.45983	94.24	1094	59	1	1	1094	1094	1	1090	1090	0	2048	12	13	12-13	72909740	72955408	12q_13q	38707790	38744295	12q_13q	12q_13q	12q_13q	193003.52	1	1
CIGENEomyV6.10410	CIGENEomyV6.72052	88.2	1237	129	8	289	1522	1522	27	1249	1249	0	2185	3	22	3-22	60823859	60927282	3q_22q	35281384	35302771	3q_22q	3q_22q	3q_22q	192717	0.81	0.98
CIGENEomyV6.34414	CIGENEomyV6.41322	99.16	953	8	0	1	953	953	1	953	953	0	1942	10	12	10-12	23216246	23308803	10p_12p	34029963	34097885	10p_12p	10p_12p	10p_12p	192568.72	1	1
CIGENEomyV6.22123	CIGENEomyV6.80926	97.74	972	22	0	1	972	972	1	972	972	0	1967	6	26	6-26	66866410	66885436	6q_26	21924397	21942674	6q_26	6q_26	6q_26	192254.58	1	1
CIGENEomyV6.20284	CIGENEomyV6.38230	89.58	1296	108	8	207	1481	1481	1	1290	1290	0	2146	6	11	6-11	19855266	19921395	6p_11q	48823659	48948869	6p_11q	6p_11q	6p_11q	192238.68	0.87	1
CIGENEomyV6.12490	CIGENEomyV6.17844	86.29	1415	130	15	1	1369	1376	1	1397	1563	0	2225	4	5	4-5	14331949	14501502	4p_5q	60083169	60113479	4p_5q	4p_5q	4p_5q	191995.25	1.02	0.9
CIGENEomyV6.1982	CIGENEomyV6.6804	89.85	1261	109	5	208	1465	1465	17	1261	1261	0	2132	1	2	1-2	47703880	47808348	1p_2q	76691356	76754172	1p_2q	1p_2q	1p_2q	191560.2	0.86	1
CIGENEomyV6.10917	CIGENEomyV6.71645	88.18	1455	168	2	1	1455	1455	234	1684	1684	0	2172	3	22	3-22	72195108	72235942	3q_22q	23719959	23844309	3q_22q	3q_22q	3q_22q	191526.96	1	0.86
CIGENEomyV6.21952	CIGENEomyV6.80754	94.95	1187	48	2	1	1177	1191	1	1185	1334	0	2017	6	26	6-26	63414042	63446091	6q_26	18543464	18639851	6q_26	6q_26	6q_26	191514.15	0.99	0.89
CIGENEomyV6.10733	CIGENEomyV6.71787	91.06	1130	80	7	1	1118	1136	1	1121	1142	0	2103	3	22	3-22	68476914	68501335	3q_22q	27136340	27156281	3q_22q	3q_22q	3q_22q	191499.18	0.99	0.98
CIGENEomyV6.42399	CIGENEomyV6.45697	99.15	939	8	0	1	939	946	1	939	971	0	1931	12	13	12-13	66063587	66090088	12q_13q	33203948	33219156	12q_13q	12q_13q	12q_13q	191458.65	0.99	0.97
CIGENEomyV6.37701	CIGENEomyV6.52340	94.88	1094	50	3	1	1094	1095	1	1088	1110	0	2015	11	15	11-15	34139742	34229859	11p_15p	23970850	24037617	11p_15p	11p_15p	11p_15p	191183.2	1	0.98
CIGENEomyV6.34767	CIGENEomyV6.40863	97.36	1022	20	1	1	1022	1022	1	1015	1015	0	1963	10	12	10-12	33728961	33755381	10p_12p	23374110	23389531	10p_12p	10p_12p	10p_12p	191117.68	1	1.01
CIGENEomyV6.36686	CIGENEomyV6.52109	80.99	1620	236	20	11	1594	1607	34	1617	1630	0	2357	11	15	11-15	6533732	6546635	11p_15p	17435926	17448984	11p_15p	11p_15p	11p_15p	190893.43	1	0.98
CIGENEomyV6.15966	CIGENEomyV6.85797	82.76	1485	207	14	1	1467	1467	1	1454	1454	0	2306	5	29	5-29	14097528	14128238	5p_29	1921432	1965518	5p_29	5p_29	5p_29	190844.56	1	1.01
CIGENEomyV6.11262	CIGENEomyV6.71185	92.92	1497	105	1	1	1497	1497	74	1569	1569	0	2053	3	22	3-22	77970017	78033412	3q_22p	10490945	10551685	3q_22p	3q_22p	3q_22p	190764.76	1	0.95
CIGENEomyV6.1396	CIGENEomyV6.6203	93.59	1092	61	4	1	1090	1090	1	1085	1085	0	2035	1	2	1-2	31167733	31222044	1p_2q	60451622	60508445	1p_2q	1p_2q	1p_2q	190455.65	1	1
CIGENEomyV6.24617	CIGENEomyV6.60034	89.96	1245	103	13	1	1240	1240	1	1228	1228	0	2117	7	17	7-17	39515714	39543946	7q_17q	58118730	58137575	7q_17q	7q_17q	7q_17q	190445.32	0.99	1
CIGENEomyV6.31612	CIGENEomyV6.56369	94.78	1111	42	6	134	1242	1242	48	1144	1144	0	2008	9	16	9-16	30080296	30272536	9q_16q	54880394	54992880	9q_16q	9q_16q	9q_16q	190318.24	0.89	0.97
CIGENEomyV6.16445	CIGENEomyV6.86433	89.69	1213	108	5	20	1226	1226	98	1299	1299	0	2120	5	29	5-29	25575998	25619572	5p_29	18445988	18481423	5p_29	5p_29	5p_29	190142.8	0.99	0.93
CIGENEomyV6.34838	CIGENEomyV6.40780	93.64	1100	69	1	648	1747	1747	9	1107	1302	0	2029	10	12	10-12	35867402	35978997	10p_12p	21370626	21432490	10p_12p	10p_12p	10p_12p	189995.56	0.63	0.84
CIGENEomyV6.1470	CIGENEomyV6.6292	95.7	1115	43	1	1	1115	1115	1	1110	1110	0	1982	1	2	1-2	32955518	32989486	1p_2q	62529049	62562434	1p_2q	1p_2q	1p_2q	189677.4	1	1
CIGENEomyV6.42475	CIGENEomyV6.45782	98.19	941	2	1	249	1174	1174	1	941	941	0	1927	12	13	12-13	67838121	67858767	12q_13q	34979868	35002811	12q_13q	12q_13q	12q_13q	189212.13	0.8	1
CIGENEomyV6.42494	CIGENEomyV6.45803	93.69	1553	67	9	1	1540	1540	13	1547	1547	0	2018	12	13	12-13	68227101	68261165	12q_13q	35374834	35414649	12q_13q	12q_13q	12q_13q	189066.42	1	1
CIGENEomyV6.25114	CIGENEomyV6.59491	97.74	972	22	0	1	972	972	1	972	972	0	1934	7	17	7-17	53273831	53288195	7q_17q	44580619	44597377	7q_17q	7q_17q	7q_17q	189029.16	1	1
CIGENEomyV6.4655	CIGENEomyV6.9219	92.49	1105	68	7	1	1098	1105	1	1097	1110	0	2043	2	3	2-3	18326842	18341409	2p_3p	28275793	28290031	2p_3p	2p_3p	2p_3p	188957.07	0.99	0.99
CIGENEomyV6.25194	CIGENEomyV6.59419	89.5	1209	118	4	1	1202	1237	1	1207	1227	0	2108	7	17	7-17	55113671	55143775	7q_17q	42580204	42633133	7q_17q	7q_17q	7q_17q	188666	0.97	0.98
CIGENEomyV6.2369	CIGENEomyV6.72910	96.02	981	37	1	1	979	979	38	1018	1018	0	1964	1	23	1-23	59080527	59135098	1q_23	3587495	3631899	1q_23	1q_23	1q_23	188583.28	1	0.96
CIGENEomyV6.28614	CIGENEomyV6.84794	94.26	1028	59	0	1	1028	1028	2	1029	1029	0	1998	8	28	8-28	55379020	55397839	8q_28	23834379	24041626	8q_28	8q_28	8q_28	188331.48	1	1
CIGENEomyV6.4899	CIGENEomyV6.9492	98.65	961	11	1	1	959	959	1	961	961	0	1907	2	3	2-3	23954986	23996446	2p_3p	34018848	34058426	2p_3p	2p_3p	2p_3p	188125.55	1	1
CIGENEomyV6.24724	CIGENEomyV6.59917	91.99	1123	72	3	315	1420	1420	10	1131	1131	0	2045	7	17	7-17	42794369	43067575	7q_17q	54469946	54516941	7q_17q	7q_17q	7q_17q	188119.55	0.79	0.99
CIGENEomyV6.17749	CIGENEomyV6.833	81.64	1449	135	13	103	1524	1524	19	1363	1363	0	2302	5	1	1-5	57627103	57732063	1p_5q	17193970	17299073	1p_5q	1p_5q	1p_5q	187935.28	0.94	1.05
CIGENEomyV6.53179	CIGENEomyV6.69319	89.62	1146	114	1	5	1150	1163	1	1141	1510	0	2097	15	21	15-21	50417458	50433071	15q_21p	18023597	18055844	15q_21p	15q_21p	15q_21p	187933.14	0.98	0.76
CIGENEomyV6.44743	CIGENEomyV6.57939	93.23	1108	68	3	1	1101	1459	318	1425	1859	0	2014	13	17	13-17	12894540	12914272	13p_17p	7798580	7831152	13p_17p	13p_17p	13p_17p	187765.22	0.76	0.59
CIGENEomyV6.10726	CIGENEomyV6.71794	84.65	1381	154	18	1	1362	1372	1	1342	1354	0	2218	3	22	3-22	68315517	68364874	3q_22q	27283138	27316360	3q_22q	3q_22q	3q_22q	187753.7	0.99	1.01
CIGENEomyV6.42218	CIGENEomyV6.45534	83.71	1363	205	4	509	1855	1855	543	1904	1904	0	2242	12	13	12-13	62245992	62283646	12q_13q	29938235	30004346	12q_13q	12q_13q	12q_13q	187677.82	0.73	0.71
CIGENEomyV6.16555	CIGENEomyV6.86543	84.03	1559	206	18	1	1544	2019	1	1531	1531	0	2233	5	29	5-29	29162883	29240496	5p_29	22288927	22328867	5p_29	5p_29	5p_29	187638.99	0.76	1.01
CIGENEomyV6.49949	CIGENEomyV6.77662	80.96	1560	224	18	1	1540	1540	1	1507	1507	0	2316	14	25	14-25	51253359	51295113	14q_25p	23993662	24019085	14q_25p	14q_25p	14q_25p	187503.36	1	1.02
CIGENEomyV6.37459	CIGENEomyV6.52543	97.39	957	25	0	1	957	957	1	957	957	0	1923	11	15	11-15	25342904	25372000	11p_15p	32425486	32474015	11p_15p	11p_15p	11p_15p	187280.97	1	1
CIGENEomyV6.21937	CIGENEomyV6.80739	98.59	924	13	0	1	924	924	201	1124	1124	0	1899	6	26	6-26	63035493	63060351	6q_26	18094131	18163618	6q_26	6q_26	6q_26	187222.41	1	0.82
CIGENEomyV6.36822	CIGENEomyV6.51981	87.47	1213	125	6	1	1203	1203	1	1196	1196	0	2137	11	15	11-15	9837922	9885530	11p_15p	14811968	14865757	11p_15p	11p_15p	11p_15p	186923.39	1	1.01
CIGENEomyV6.28379	CIGENEomyV6.85038	90.35	1233	94	10	2	1221	1221	160	1380	1380	0	2065	8	28	8-28	49483027	49517736	8q_28	29798579	29864346	8q_28	8q_28	8q_28	186572.75	1	0.89
CIGENEomyV6.16500	CIGENEomyV6.86484	92.86	1106	67	4	1	1103	1103	1	1097	1097	0	2008	5	29	5-29	26722141	26825737	5p_29	19647340	19707725	5p_29	5p_29	5p_29	186462.88	1	1
CIGENEomyV6.44968	CIGENEomyV6.58190	99.24	919	7	0	1	919	920	1	919	924	0	1878	13	17	13-17	17660947	17675221	13p_17p	13280978	13299807	13p_17p	13p_17p	13p_17p	186372.72	1	0.99
CIGENEomyV6.15990	CIGENEomyV6.86005	95.37	1058	48	1	1	1058	1058	32	1088	1088	0	1954	5	29	5-29	14754573	14850173	5p_29	6083753	6158582	5p_29	5p_29	5p_29	186352.98	1	0.97
CIGENEomyV6.12091	CIGENEomyV6.5470	81.16	1624	233	16	1	1588	2087	1	1587	1595	0	2296	4	2	2-4	5458660	5540478	2q_4p	40778439	40829731	2q_4p	2q_4p	2q_4p	186343.36	0.77	1.01
CIGENEomyV6.28624	CIGENEomyV6.84789	98.5	931	14	0	71	1001	1001	1	931	931	0	1891	8	28	8-28	55771703	55809156	8q_28	23578736	23620516	8q_28	8q_28	8q_28	186263.5	0.93	1
CIGENEomyV6.53532	CIGENEomyV6.68949	98.59	921	13	0	1	921	921	1	921	921	0	1888	15	21	15-21	56691155	56713174	15q_21p	11396116	11421399	15q_21p	15q_21p	15q_21p	186137.92	1	1
CIGENEomyV6.75484	CIGENEomyV6.82833	95.66	1037	37	1	1	1037	1037	1	1029	1029	0	1945	24	27	24-27	22875942	22933465	24_27	25913843	25963685	24_27	24_27	24_27	186058.7	1	1.01
CIGENEomyV6.50012	CIGENEomyV6.77739	89.34	1135	119	2	1	1134	1134	53	1186	1307	0	2082	14	25	14-25	52943094	52992481	14q_25p	25633693	25722307	14q_25p	14q_25p	14q_25p	186005.88	1	0.87
CIGENEomyV6.1692	CIGENEomyV6.6523	81.01	1532	236	13	1	1517	1821	40	1531	1543	0	2296	1	2	1-2	39239143	39333844	1p_2q	68542924	68651258	1p_2q	1p_2q	1p_2q	185998.96	0.83	0.98
CIGENEomyV6.42691	CIGENEomyV6.46027	96.47	1020	36	0	1	1020	1020	1	1020	1020	0	1927	12	13	12-13	71956418	71970356	12q_13q	39637448	39650809	12q_13q	12q_13q	12q_13q	185897.69	1	1
CIGENEomyV6.4123	CIGENEomyV6.8693	95.42	1027	44	1	1	1027	1027	1	1024	1024	0	1946	2	3	2-3	8168889	8234324	2p_3p	17818782	17867211	2p_3p	2p_3p	2p_3p	185687.32	1	1
CIGENEomyV6.14160	CIGENEomyV6.27409	98.37	921	15	0	1	921	921	1	921	921	0	1886	4	8	4-8	63555093	63595924	4q_8p	21934661	21985514	4q_8p	4q_8p	4q_8p	185525.82	1	1
CIGENEomyV6.65210	CIGENEomyV6.79191	93.98	1030	60	1	1	1028	1028	69	1098	1098	0	1974	19	25	19-25	32512766	32647657	19q_25q	65955745	66123465	19q_25q	19q_25q	19q_25q	185516.52	1	0.94
CIGENEomyV6.53359	CIGENEomyV6.69139	97.1	965	26	1	322	1286	1286	1	963	963	0	1910	15	21	15-21	53184158	53208243	15q_21p	14900724	14921149	15q_21p	15q_21p	15q_21p	185461	0.75	1
CIGENEomyV6.12594	CIGENEomyV6.17950	89.32	1198	91	7	10	1205	1205	1	1163	1163	0	2076	4	5	4-5	16755882	16800192	4p_5q	62252725	62276473	4p_5q	4p_5q	4p_5q	185428.32	0.99	1.02
CIGENEomyV6.5048	CIGENEomyV6.9634	99.22	898	7	0	226	1123	1123	6	903	903	0	1867	2	3	2-3	27768272	27797312	2p_3p	37730275	37760106	2p_3p	2p_3p	2p_3p	185243.74	0.8	0.99
CIGENEomyV6.50094	CIGENEomyV6.77819	86.87	1348	144	13	1	1339	1339	1	1324	1324	0	2132	14	25	14-25	55049864	55061603	14q_25p	27942588	27972152	14q_25p	14q_25p	14q_25p	185206.84	1	1.01
CIGENEomyV6.3696	CIGENEomyV6.8173	96.82	1164	31	2	1	1160	1160	2	1163	1163	0	1912	2	3	2-3	2984661	3000151	2p_3p	10984015	11014676	2p_3p	2p_3p	2p_3p	185119.84	1	1
CIGENEomyV6.31246	CIGENEomyV6.70417	99.89	898	1	0	596	1493	1583	181	1078	1115	0	1852	9	21	9-21	18891947	18903958	9p_21q	42751917	42770543	9p_21q	9p_21q	9p_21q	184996.28	0.57	0.81
CIGENEomyV6.16421	CIGENEomyV6.86406	92.5	1094	67	4	671	1752	1752	1	1091	1091	0	1999	5	29	5-29	25150222	25183591	5p_29	17928045	17957053	5p_29	5p_29	5p_29	184907.5	0.62	1
CIGENEomyV6.74646	CIGENEomyV6.81966	96.19	1101	37	1	38	1133	1133	12	1112	1112	0	1920	24	27	24-27	4132255	4176331	24_27	5887118	5922956	24_27	24_27	24_27	184684.8	0.97	0.99
CIGENEomyV6.37554	CIGENEomyV6.52460	89.31	1141	115	4	1	1137	1140	1	1138	1141	0	2065	11	15	11-15	29998208	30013982	11p_15p	27724350	27750651	11p_15p	11p_15p	11p_15p	184425.15	1	1
CIGENEomyV6.44821	CIGENEomyV6.58038	95.31	1067	41	2	71	1128	1128	33	1099	1099	0	1934	13	17	13-17	13924627	14006904	13p_17p	9738115	9790535	13p_17p	13p_17p	13p_17p	184329.54	0.94	0.97
CIGENEomyV6.35946	CIGENEomyV6.64325	98.06	927	11	1	368	1287	1287	1	927	927	0	1879	10	19	10-19	60954134	60989402	10q_19p	10891970	10907963	10q_19p	10q_19p	10q_19p	184254.74	0.72	1
CIGENEomyV6.23587	CIGENEomyV6.61666	86.2	1268	105	8	1	1201	1201	1	1265	1265	0	2136	7	18	7-18	10404993	10410883	7p_18p	12529540	12535584	7p_18p	7p_18p	7p_18p	184123.2	1.05	1
CIGENEomyV6.42726	CIGENEomyV6.45991	97.83	1060	10	2	18	1074	1074	20	1069	1069	0	1880	12	13	12-13	72521863	72610953	12q_13q	39021382	39110461	12q_13q	12q_13q	12q_13q	183920.4	0.99	0.99
CIGENEomyV6.49098	CIGENEomyV6.62338	99.55	889	4	0	1	889	889	1	889	889	0	1847	14	18	14-18	31085393	31122283	14p_18q	30822168	30861655	14p_18q	14p_18q	14p_18q	183868.85	1	1
CIGENEomyV6.53571	CIGENEomyV6.68893	94.58	1070	33	4	1	1064	1064	1	1051	1051	0	1944	15	21	15-21	57170101	57195304	15q_21p	10861206	10881806	15q_21p	15q_21p	15q_21p	183863.52	1	1.01
CIGENEomyV6.20419	CIGENEomyV6.38347	90.03	1093	98	3	56	1144	1144	1	1086	1086	0	2042	6	11	6-11	23006400	23018072	6p_11q	52005607	52013748	6p_11q	6p_11q	6p_11q	183841.26	0.95	1
CIGENEomyV6.50077	CIGENEomyV6.77794	97.45	942	24	0	33	974	1044	1	942	960	0	1886	14	25	14-25	54469177	54487435	14q_25p	27294327	27306628	14q_25p	14q_25p	14q_25p	183790.7	0.9	0.98
CIGENEomyV6.48878	CIGENEomyV6.62583	84.75	1482	190	12	184	1648	1648	1	1463	1463	0	2166	14	18	14-18	26708900	26730075	14p_18q	35079284	35098199	14p_18q	14p_18q	14p_18q	183568.5	0.89	1
CIGENEomyV6.10829	CIGENEomyV6.71710	90.1	1526	116	14	1	1515	1515	1	1502	1502	0	2035	3	22	3-22	70441266	70466150	3q_22q	25271742	25303559	3q_22q	3q_22q	3q_22q	183353.5	1	1.01
CIGENEomyV6.42752	CIGENEomyV6.45971	96.22	980	30	3	1	978	978	1	975	975	0	1905	12	13	12-13	73106245	73134955	12q_13q	38545269	38568969	12q_13q	12q_13q	12q_13q	183299.1	1	1
CIGENEomyV6.42724	CIGENEomyV6.45994	94.87	1248	47	4	1	1234	1234	1	1245	1245	0	1932	12	13	12-13	72460608	72505922	12q_13q	39125505	39176361	12q_13q	12q_13q	12q_13q	183288.84	1.01	1
CIGENEomyV6.24708	CIGENEomyV6.59938	88.66	1129	75	2	393	1468	1946	9	1137	1270	0	2065	7	17	7-17	42234888	42308714	7q_17q	55160576	55196870	7q_17q	7q_17q	7q_17q	183082.9	0.58	0.89
CIGENEomyV6.19979	CIGENEomyV6.37923	92.11	1090	63	6	1	1077	1077	107	1186	1186	0	1984	6	11	6-11	13894573	13946913	6p_11q	42521254	42630729	6p_11q	6p_11q	6p_11q	182746.24	1.01	0.91
CIGENEomyV6.49033	CIGENEomyV6.62402	92.52	1350	83	8	1	1340	1340	1	1342	1342	0	1974	14	18	14-18	29934124	29978795	14p_18q	31805469	31826282	14p_18q	14p_18q	14p_18q	182634.48	1	1
CIGENEomyV6.31051	CIGENEomyV6.70208	91.06	1108	76	6	1	1104	1609	12	1100	1100	0	2005	9	21	9-21	13250723	13288483	9p_21q	36988497	37008421	9p_21q	9p_21q	9p_21q	182575.3	0.68	1
CIGENEomyV6.32229	CIGENEomyV6.56089	96.16	964	34	1	81	1041	1051	1	964	965	0	1896	9	16	9-16	45837817	45930120	9q_16q	48516738	48597056	9q_16q	9q_16q	9q_16q	182319.36	0.92	1
CIGENEomyV6.50972	CIGENEomyV6.76627	90.08	1199	94	10	1	1186	1186	1	1187	1187	0	2023	14	25	14-25	75579968	75708008	14q_25p	5372892	5391021	14q_25p	14q_25p	14q_25p	182231.84	1	1
CIGENEomyV6.74824	CIGENEomyV6.82208	86.66	1259	113	12	81	1314	1314	18	1246	1246	0	2101	24	27	24-27	7676364	7717902	24_27	10503706	10515050	24_27	24_27	24_27	182072.66	0.95	1
CIGENEomyV6.49804	CIGENEomyV6.77453	90.34	1097	104	1	1	1097	1097	1	1095	1095	0	2013	14	25	14-25	48776426	48843517	14q_25p	21177062	21218063	14q_25p	14q_25p	14q_25p	181854.42	1	1
CIGENEomyV6.42403	CIGENEomyV6.45703	90.59	1137	92	6	1	1129	1129	1	1130	1130	0	2006	12	13	12-13	66128669	66343105	12q_13q	33270418	33282171	12q_13q	12q_13q	12q_13q	181723.54	1	1
CIGENEomyV6.75603	CIGENEomyV6.82943	98.89	899	10	0	39	937	937	1	899	899	0	1835	24	27	24-27	25913082	25923503	24_27	28498144	28570150	24_27	24_27	24_27	181463.15	0.96	1
CIGENEomyV6.74783	CIGENEomyV6.82160	91.74	1089	81	5	10	1090	1090	2	1089	1089	0	1977	24	27	24-27	7164520	7174838	24_27	9950964	9962564	24_27	24_27	24_27	181369.98	0.99	1
CIGENEomyV6.54560	CIGENEomyV6.67106	88.57	1199	113	9	1	1183	1189	1	1191	1213	0	2047	16	20	16-20	12244366	12293339	16p_20p	13023759	13113834	16p_20p	16p_20p	16p_20p	181302.79	1	0.98
CIGENEomyV6.22136	CIGENEomyV6.80935	97.92	914	19	0	1	914	914	1	914	914	0	1851	6	26	6-26	67046497	67137025	6q_26	22090549	22120708	6q_26	6q_26	6q_26	181249.92	1	1
CIGENEomyV6.25354	CIGENEomyV6.59236	92.18	1112	75	4	1	1105	1105	1	1107	1107	0	1966	7	17	7-17	59083138	59176615	7q_17q	38363661	38432790	7q_17q	7q_17q	7q_17q	181225.88	1	1
CIGENEomyV6.42703	CIGENEomyV6.46010	93.93	1005	54	3	1	1000	1000	1	1003	1003	0	1929	12	13	12-13	72133930	72149239	12q_13q	39450221	39464967	12q_13q	12q_13q	12q_13q	181190.97	1	1
CIGENEomyV6.2894	CIGENEomyV6.73408	95.09	998	38	4	1	994	994	1	991	991	0	1904	1	23	1-23	72918929	72991288	1q_23	17853963	17931681	1q_23	1q_23	1q_23	181051.36	1	1
CIGENEomyV6.50174	CIGENEomyV6.77879	88.83	1191	109	7	17	1192	1192	1	1182	1182	0	2036	14	25	14-25	56398079	56431063	14q_25p	29220076	29237115	14q_25p	14q_25p	14q_25p	180857.88	0.99	1
CIGENEomyV6.4438	CIGENEomyV6.9000	97.07	956	28	0	1	956	956	1	956	956	0	1862	2	3	2-3	14542058	14559865	2p_3p	24326236	24341687	2p_3p	2p_3p	2p_3p	180744.34	1	1
CIGENEomyV6.33997	CIGENEomyV6.41649	93.73	1005	61	2	1	1004	1029	213	1216	1664	0	1928	10	12	10-12	9695397	9730979	10p_12p	47199820	47331431	10p_12p	10p_12p	10p_12p	180711.44	0.97	0.6
CIGENEomyV6.50304	CIGENEomyV6.77996	98.55	898	13	0	1	898	898	17	914	914	0	1833	14	25	14-25	59922973	59980409	14q_25p	33469719	33544095	14q_25p	14q_25p	14q_25p	180642.15	1	0.98
CIGENEomyV6.22282	CIGENEomyV6.81067	98.03	963	16	2	1	960	960	1	963	963	0	1842	6	26	6-26	70823030	70862767	6q_26	25500522	25767155	6q_26	6q_26	6q_26	180571.26	1	1
CIGENEomyV6.22261	CIGENEomyV6.81059	95.15	1093	36	6	1	1086	1086	1	1083	1083	0	1894	6	26	6-26	70383966	70437955	6q_26	25289821	25334637	6q_26	6q_26	6q_26	180214.1	1	1
CIGENEomyV6.75354	CIGENEomyV6.82706	84.96	1277	148	9	136	1409	1413	22	1257	1267	0	2117	24	27	24-27	19632563	19692360	24_27	22935499	23005064	24_27	24_27	24_27	179860.32	0.9	1
CIGENEomyV6.16369	CIGENEomyV6.86366	97.28	956	26	0	1	956	972	1	956	1044	0	1848	5	29	5-29	23571869	23616494	5p_29	16202476	16252121	5p_29	5p_29	5p_29	179773.44	0.98	0.92
CIGENEomyV6.10568	CIGENEomyV6.71921	89.65	1150	104	5	1	1141	1141	1	1144	1144	0	2000	3	22	3-22	65327281	65352427	3q_22q	30328566	30348477	3q_22q	3q_22q	3q_22q	179300	1	1
CIGENEomyV6.42370	CIGENEomyV6.45663	90.36	1110	82	2	39	1135	1137	116	1213	1217	0	1980	12	13	12-13	65595334	65659443	12q_13q	32749648	32782197	12q_13q	12q_13q	12q_13q	178912.8	0.97	0.91
CIGENEomyV6.53590	CIGENEomyV6.68870	97.81	914	20	0	1	914	966	1	914	925	0	1828	15	21	15-21	57533828	57558399	15q_21p	10425701	10478319	15q_21p	15q_21p	15q_21p	178796.68	0.95	0.99
CIGENEomyV6.24616	CIGENEomyV6.60035	80.42	1568	223	22	1	1538	1538	1	1514	1514	0	2223	7	17	7-17	39449630	39493233	7q_17q	58153334	58187275	7q_17q	7q_17q	7q_17q	178773.66	1.01	1.02
CIGENEomyV6.10110	CIGENEomyV6.71303	91.19	1056	70	2	62	1095	1095	37	1091	1091	0	1958	3	22	3-22	52660565	52688003	3q_22p	14597170	14628576	3q_22p	3q_22p	3q_22p	178550.02	0.96	0.97
CIGENEomyV6.48663	CIGENEomyV6.62793	92.43	1176	66	10	10	1180	1180	1122	2279	2279	0	1930	14	18	14-18	21981589	21989480	14p_18q	40234828	40301063	14p_18q	14p_18q	14p_18q	178389.9	0.99	0.51
CIGENEomyV6.24005	CIGENEomyV6.62024	95.35	947	44	0	1	947	947	1	947	947	0	1870	7	18	7-18	19800380	19808134	7p_18p	21783443	21790028	7p_18p	7p_18p	7p_18p	178304.5	1	1
CIGENEomyV6.48715	CIGENEomyV6.62744	85.15	1246	177	4	1	1242	1244	1	1242	1244	0	2094	14	18	14-18	23120716	23150644	14p_18q	38984299	39002540	14p_18q	14p_18q	14p_18q	178304.1	1	1
CIGENEomyV6.24916	CIGENEomyV6.59716	92.77	1009	45	2	33	1041	1041	2	982	982	0	1922	7	17	7-17	49171570	49295212	7q_17q	48780781	48841226	7q_17q	7q_17q	7q_17q	178303.94	0.97	1.03
CIGENEomyV6.28728	CIGENEomyV6.84762	88.42	1200	106	14	1	1185	1185	1	1182	1182	0	2016	8	28	8-28	57497968	57527981	8q_28	22827146	22859284	8q_28	8q_28	8q_28	178254.72	1	1
CIGENEomyV6.16868	CIGENEomyV6.40565	92.2	1013	79	0	17	1029	1029	10	1022	1022	0	1932	5	12	5-12	36188761	36216982	5p_12p	15692897	15742867	5p_12p	5p_12p	5p_12p	178130.4	0.98	0.99
CIGENEomyV6.65850	CIGENEomyV6.78583	91.13	1094	88	3	276	1364	1364	1	1090	1090	0	1954	19	25	19-25	46400754	46428089	19q_25q	51986165	52019964	19q_25q	19q_25q	19q_25q	178068.02	0.8	1
CIGENEomyV6.43132	CIGENEomyV6.46478	97.82	919	14	1	1	913	913	1	919	919	0	1820	12	13	12-13	80095489	80128828	12q_13q	46544454	46593951	12q_13q	12q_13q	12q_13q	178032.4	1.01	1
CIGENEomyV6.10807	CIGENEomyV6.71738	92.66	1063	67	3	1	1059	1059	1	1056	1056	0	1920	3	22	3-22	69887296	70025552	3q_22q	25721943	25818404	3q_22q	3q_22q	3q_22q	177907.2	1	1
CIGENEomyV6.23579	CIGENEomyV6.61656	92.39	1012	76	1	1	1012	1012	1	1011	1011	0	1925	7	18	7-18	10267557	10285696	7p_18p	12361386	12382165	7p_18p	7p_18p	7p_18p	177850.75	1	1
CIGENEomyV6.75133	CIGENEomyV6.82501	94.14	1024	60	0	1	1024	1024	1005	2028	2028	0	1883	24	27	24-27	14574975	14581510	24_27	17607680	17648065	24_27	24_27	24_27	177265.62	1	0.5
CIGENEomyV6.23656	CIGENEomyV6.61706	92.78	1219	82	3	1	1216	1216	3	1218	1218	0	1910	7	18	7-18	11401300	11432318	7p_18p	13249963	13289611	7p_18p	7p_18p	7p_18p	177209.8	1	1
CIGENEomyV6.20274	CIGENEomyV6.38215	91.76	1129	84	4	8	1129	1129	1	1127	1127	0	1931	6	11	6-11	19587457	19622173	6p_11q	48591104	48623329	6p_11q	6p_11q	6p_11q	177188.56	1	1
CIGENEomyV6.22145	CIGENEomyV6.80942	99.08	869	8	0	1	869	869	1	869	869	0	1786	6	26	6-26	67193640	67235310	6q_26	22222913	22289915	6q_26	6q_26	6q_26	176956.88	1	1
CIGENEomyV6.24355	CIGENEomyV6.60372	96.64	922	31	0	1	922	922	1	922	922	0	1831	7	17	7-17	30883455	31212649	7q_17q	66707908	66988073	7q_17q	7q_17q	7q_17q	176947.84	1	1
CIGENEomyV6.44855	CIGENEomyV6.58088	99.21	1014	8	0	13	1026	1026	774	1787	1787	0	1783	13	17	13-17	15754359	15777041	13p_17p	11529230	11580042	13p_17p	13p_17p	13p_17p	176891.43	0.99	0.57
CIGENEomyV6.48725	CIGENEomyV6.62724	89.17	1154	89	8	1	1140	1140	174	1305	1305	0	1981	14	18	14-18	23547956	23633636	14p_18q	38400786	38488935	14p_18q	14p_18q	14p_18q	176645.77	1.01	0.88
CIGENEomyV6.65441	CIGENEomyV6.78975	90.83	1112	98	3	1	1110	1110	1	1110	1110	0	1943	19	25	19-25	37559688	37591622	19q_25q	60703756	60754743	19q_25q	19q_25q	19q_25q	176482.69	1	1
CIGENEomyV6.36704	CIGENEomyV6.52095	94.26	1011	56	1	1	1009	1009	78	1088	1088	0	1872	11	15	11-15	6786964	6806917	11p_15p	17300435	17312102	11p_15p	11p_15p	11p_15p	176454.72	1	0.93
CIGENEomyV6.24413	CIGENEomyV6.60256	81.78	1427	205	14	1	1407	1407	2	1393	1393	0	2157	7	17	7-17	33379068	33989757	7q_17q	64089012	64138545	7q_17q	7q_17q	7q_17q	176399.46	1	1.01
CIGENEomyV6.23731	CIGENEomyV6.61771	99.31	868	6	0	1	868	868	1	868	868	0	1775	7	18	7-18	12956167	12974753	7p_18p	14842046	14850823	7p_18p	7p_18p	7p_18p	176275.25	1	1
CIGENEomyV6.49897	CIGENEomyV6.77583	95.2	980	46	1	1	980	1008	1	979	1007	0	1851	14	25	14-25	50060930	50501981	14q_25p	22713419	22898274	14q_25p	14q_25p	14q_25p	176215.2	0.97	0.97
CIGENEomyV6.12464	CIGENEomyV6.17816	99.42	859	5	0	1	859	859	1	859	859	0	1772	4	5	4-5	13928911	13945013	4p_5q	59587398	59595675	4p_5q	4p_5q	4p_5q	176172.24	1	1
CIGENEomyV6.12289	CIGENEomyV6.5595	96.19	918	35	0	1	918	918	1	918	918	0	1829	4	2	2-4	9224103	9416304	2q_4p	44278261	44502447	2q_4p	2q_4p	2q_4p	175931.51	1	1
CIGENEomyV6.22147	CIGENEomyV6.80943	96.57	961	33	0	1	961	961	1	961	961	0	1821	6	26	6-26	67223402	67260040	6q_26	22286104	22314616	6q_26	6q_26	6q_26	175853.97	1	1
CIGENEomyV6.10166	CIGENEomyV6.72386	93.18	968	38	2	7	970	1206	97	1040	1072	0	1887	3	22	3-22	53802573	53933101	3q_22q	43352823	43392695	3q_22q	3q_22q	3q_22q	175830.66	0.8	0.9
CIGENEomyV6.65787	CIGENEomyV6.78642	84.73	1251	117	7	318	1554	1554	226	1416	1416	0	2075	19	25	19-25	44964746	45047327	19q_25q	53341638	53436181	19q_25q	19q_25q	19q_25q	175814.75	0.8	0.88
CIGENEomyV6.24526	CIGENEomyV6.60151	92.08	1010	80	0	14	1023	1023	12	1021	1021	0	1908	7	17	7-17	36430679	36509861	7q_17q	61296052	61412399	7q_17q	7q_17q	7q_17q	175688.64	0.99	0.99
CIGENEomyV6.48242	CIGENEomyV6.63279	98.41	882	5	3	1	874	874	1	881	881	0	1785	14	18	14-18	11993008	12024646	14p_18q	50995956	51011575	14p_18q	14p_18q	14p_18q	175661.85	1.01	1
CIGENEomyV6.14321	CIGENEomyV6.27924	89.3	1215	115	5	170	1373	1373	17	1227	1227	0	1967	4	8	4-8	66828113	67111503	4q_8p	36209312	36539372	4q_8p	4q_8p	4q_8p	175653.1	0.88	0.99
CIGENEomyV6.20558	CIGENEomyV6.38501	91.42	1072	85	3	1	1068	1068	1	1069	1069	0	1921	6	11	6-11	26567202	26623063	6p_11q	55699510	55741747	6p_11q	6p_11q	6p_11q	175617.82	1	1
CIGENEomyV6.49900	CIGENEomyV6.77592	92.47	1023	68	1	9	1022	1022	1	1023	1023	0	1897	14	25	14-25	50369839	50377958	14q_25p	22947503	22956632	14q_25p	14q_25p	14q_25p	175415.59	1	1
CIGENEomyV6.20132	CIGENEomyV6.38079	82.18	1330	219	11	14	1334	1341	169	1489	1508	0	2130	6	11	6-11	17187061	17197183	6p_11q	46325820	46334604	6p_11q	6p_11q	6p_11q	175043.4	0.98	0.87
CIGENEomyV6.34772	CIGENEomyV6.40852	94.76	974	46	2	1	972	972	1	971	971	0	1847	10	12	10-12	33867153	33884731	10p_12p	23279257	23288624	10p_12p	10p_12p	10p_12p	175021.72	1	1
CIGENEomyV6.1422	CIGENEomyV6.6229	85.49	1323	137	10	1	1274	1274	1	1317	1317	0	2046	1	2	1-2	31604960	31649883	1p_2q	61007989	61154358	1p_2q	1p_2q	1p_2q	174912.54	1.03	1
CIGENEomyV6.42849	CIGENEomyV6.46146	93.67	1121	44	3	1	1121	1121	1	1094	1094	0	1867	12	13	12-13	74532867	74549937	12q_13q	41446161	41466951	12q_13q	12q_13q	12q_13q	174881.89	1	1.02
CIGENEomyV6.50248	CIGENEomyV6.77934	89.28	1110	115	2	1	1110	1190	1	1106	1106	0	1958	14	25	14-25	57894996	57919892	14q_25p	30884076	30902566	14q_25p	14q_25p	14q_25p	174810.24	0.93	1
CIGENEomyV6.24528	CIGENEomyV6.60148	89.98	1038	104	0	8	1045	1184	1	1038	1176	0	1942	7	17	7-17	36582306	36657597	7q_17q	61122041	61222890	7q_17q	7q_17q	7q_17q	174741.16	0.88	0.88
CIGENEomyV6.13418	CIGENEomyV6.41976	89.42	1172	99	12	64	1220	1307	1	1162	1173	0	1954	4	12	4-12	42047368	42096199	4p_12q	56620552	56680464	4p_12q	4p_12q	4p_12q	174726.68	0.89	0.99
CIGENEomyV6.53499	CIGENEomyV6.68974	92.1	1203	79	7	1	1194	1194	1	1196	1196	0	1897	15	21	15-21	56246955	56274853	15q_21p	11843391	11871215	15q_21p	15q_21p	15q_21p	174713.7	1	1
CIGENEomyV6.10209	CIGENEomyV6.72297	93.55	976	61	2	1	974	974	1	976	976	0	1867	3	22	3-22	55690735	55750791	3q_22q	40547987	40621986	3q_22q	3q_22q	3q_22q	174657.85	1	1
CIGENEomyV6.35172	CIGENEomyV6.87015	82.07	1372	175	11	1	1356	1356	1	1317	1317	0	2127	10	29	10-29	42576296	42594092	10p_29	31467122	31479442	10p_29	10p_29	10p_29	174562.89	1	1.03
CIGENEomyV6.16536	CIGENEomyV6.86518	94.63	987	51	2	21	1006	1100	21	1006	1015	0	1842	5	29	5-29	27699833	28046944	5p_29	20696754	21177058	5p_29	5p_29	5p_29	174308.46	0.9	0.97
CIGENEomyV6.24464	CIGENEomyV6.60217	85.68	1236	112	11	30	1225	1225	13	1223	1223	0	2033	7	17	7-17	34929242	34959110	7q_17q	63112680	63131234	7q_17q	7q_17q	7q_17q	174187.44	1	1
CIGENEomyV6.4693	CIGENEomyV6.9262	97.72	879	18	1	1	877	877	1	879	879	0	1782	2	3	2-3	19269876	19310976	2p_3p	29224521	29234801	2p_3p	2p_3p	2p_3p	174137.04	1	1
CIGENEomyV6.45368	CIGENEomyV6.58500	97.87	940	18	1	1	938	938	1	940	940	0	1779	13	17	13-17	26359459	26462977	13p_17p	19216783	19299763	13p_17p	13p_17p	13p_17p	174110.73	1	1
CIGENEomyV6.4369	CIGENEomyV6.8767	99.18	851	7	0	32	882	882	1	851	851	0	1754	2	3	2-3	12735558	12758323	2p_3p	19194195	19220371	2p_3p	2p_3p	2p_3p	173961.72	0.96	1
CIGENEomyV6.32218	CIGENEomyV6.56103	91.51	1013	83	2	9	1018	1018	19	1031	1031	0	1901	9	16	9-16	45543104	45585062	9q_16q	48827549	48888742	9q_16q	9q_16q	9q_16q	173960.51	0.99	0.98
CIGENEomyV6.29430	CIGENEomyV6.84165	98.72	859	11	0	1	859	859	1	859	859	0	1762	8	28	8-28	73313530	73326072	8q_28	7276752	7302535	8q_28	8q_28	8q_28	173944.64	1	1
CIGENEomyV6.49237	CIGENEomyV6.62198	82.09	1904	241	27	1	1833	1878	98	1972	2011	0	2118	14	18	14-18	35045915	35300410	14p_18q	26819783	26868719	14p_18q	14p_18q	14p_18q	173866.62	1	0.93
CIGENEomyV6.33921	CIGENEomyV6.41700	94.12	1140	54	5	1	1128	1128	8	1146	1146	0	1847	10	12	10-12	7877342	7906498	10p_12p	49173689	49210099	10p_12p	10p_12p	10p_12p	173839.64	1.01	0.99
CIGENEomyV6.1430	CIGENEomyV6.6253	91.24	1313	89	6	276	1581	1581	77	1370	1370	0	1905	1	2	1-2	32026161	32123718	1p_2q	61547176	61585365	1p_2q	1p_2q	1p_2q	173812.2	0.83	0.95
CIGENEomyV6.54399	CIGENEomyV6.66925	91.37	1043	48	7	8	1029	1029	139	1160	1338	0	1902	16	20	16-20	7829324	7883135	16p_20p	8330972	8369541	16p_20p	16p_20p	16p_20p	173785.74	1.01	0.77
CIGENEomyV6.2907	CIGENEomyV6.73425	86.43	1179	113	7	1	1177	1177	1	1134	1134	0	2010	1	23	1-23	73351898	73422661	1q_23	18338940	18446271	1q_23	1q_23	1q_23	173724.3	1	1.03
CIGENEomyV6.48697	CIGENEomyV6.62765	93.62	1145	73	0	1	1145	1145	1	1145	1625	0	1853	14	18	14-18	22549470	22600556	14p_18q	39565576	39639652	14p_18q	14p_18q	14p_18q	173477.86	1	0.7
CIGENEomyV6.75495	CIGENEomyV6.82845	91.77	1033	81	2	1	1030	1030	1	1032	1032	0	1889	24	27	24-27	23462865	23578287	24_27	26456030	26589553	24_27	24_27	24_27	173353.53	1	1
CIGENEomyV6.16573	CIGENEomyV6.86571	87.29	1125	92	7	1	1101	1101	1	1098	1098	0	1984	5	29	5-29	29658200	29726064	5p_29	22910984	22969918	5p_29	5p_29	5p_29	173183.36	1.02	1.02
CIGENEomyV6.28730	CIGENEomyV6.84760	85.66	1151	157	3	1	1143	1143	1	1151	1151	0	2019	8	28	8-28	57539151	57558153	8q_28	22795239	22815516	8q_28	8q_28	8q_28	172947.54	1	1
CIGENEomyV6.13993	CIGENEomyV6.27259	90.81	1121	46	3	1	1121	1149	1	1064	1066	0	1902	4	8	4-8	59767571	59931587	4q_8p	18017010	18126258	4q_8p	4q_8p	4q_8p	172720.62	0.97	1.05
CIGENEomyV6.42455	CIGENEomyV6.45762	99.17	844	7	0	1	844	844	1	844	844	0	1741	12	13	12-13	67430663	67455041	12q_13q	34544604	34565743	12q_13q	12q_13q	12q_13q	172654.97	1	1
CIGENEomyV6.4311	CIGENEomyV6.8815	94.35	955	54	0	1	955	955	1	955	955	0	1828	2	3	2-3	11685659	11693703	2p_3p	20255282	20280371	2p_3p	2p_3p	2p_3p	172471.8	1	1
CIGENEomyV6.75381	CIGENEomyV6.82740	82.56	1399	180	13	1	1398	1398	1	1336	1336	0	2089	24	27	24-27	20176376	20189427	24_27	23484230	23497406	24_27	24_27	24_27	172467.84	0.99	1.04
CIGENEomyV6.12609	CIGENEomyV6.17966	83.1	1331	155	10	1	1278	1278	1	1314	1314	0	2074	4	5	4-5	17085069	17135926	4p_5q	62575621	62587928	4p_5q	4p_5q	4p_5q	172349.4	1.03	1.01
CIGENEomyV6.4577	CIGENEomyV6.9150	98.93	844	9	0	1	844	844	1	844	844	0	1742	2	3	2-3	17189726	17208494	2p_3p	26855542	26875021	2p_3p	2p_3p	2p_3p	172336.06	1	1
CIGENEomyV6.42214	CIGENEomyV6.45531	91.1	1135	83	7	1	1123	1123	1	1129	1129	0	1890	12	13	12-13	62064848	62158903	12q_13q	29817127	29867209	12q_13q	12q_13q	12q_13q	172179	1	1
CIGENEomyV6.34029	CIGENEomyV6.41825	81.83	1464	206	17	40	1466	1615	949	2389	2613	0	2103	10	12	10-12	10867182	10885875	10p_12p	52221421	52278412	10p_12p	10p_12p	10p_12p	172088.49	0.9	0.55
CIGENEomyV6.17747	CIGENEomyV6.829	84.39	1294	176	11	21	1311	1311	1	1271	1271	0	2038	5	1	1-5	57592113	57619594	1p_5q	17135659	17184541	1p_5q	1p_5q	1p_5q	171986.82	0.98	1.01
CIGENEomyV6.34328	CIGENEomyV6.41410	86	1193	139	8	41	1221	1221	7	1183	1183	0	1999	10	12	10-12	21703137	21735578	10p_12p	35908746	35936451	10p_12p	10p_12p	10p_12p	171914	0.97	1
CIGENEomyV6.20637	CIGENEomyV6.38576	91.4	1070	82	2	1	1066	1066	1	1064	1064	0	1880	6	11	6-11	28394401	28430469	6p_11q	57555693	57621002	6p_11q	6p_11q	6p_11q	171832	1	1
CIGENEomyV6.22213	CIGENEomyV6.81000	92.55	1074	52	7	1	1052	1282	1	1068	1068	0	1855	6	26	6-26	69194877	69218508	6q_26	24095796	24124763	6q_26	6q_26	6q_26	171680.25	0.83	1
CIGENEomyV6.17173	CIGENEomyV6.40173	83.25	1385	184	21	1	1365	1365	1	1357	1357	0	2061	5	12	5-12	43161508	43202132	5p_12p	8596934	8645876	5p_12p	5p_12p	5p_12p	171578.25	1	1.01
CIGENEomyV6.13895	CIGENEomyV6.27129	94.17	961	54	2	1	960	960	1	960	960	0	1821	4	8	4-8	56579689	56675119	4q_8p	14728903	14760427	4q_8p	4q_8p	4q_8p	171483.57	1	1
CIGENEomyV6.48702	CIGENEomyV6.62758	86.85	1209	134	8	1	1191	1191	62	1263	1263	0	1972	14	18	14-18	22655431	22707404	14p_18q	39488890	39504478	14p_18q	14p_18q	14p_18q	171268.2	1.01	0.95
CIGENEomyV6.74870	CIGENEomyV6.82252	94.75	915	47	1	1	915	917	1	914	916	0	1807	24	27	24-27	9308876	9770145	24_27	12271085	12281320	24_27	24_27	24_27	171213.25	1	1
CIGENEomyV6.64898	CIGENEomyV6.79559	87.78	1154	110	6	1	1130	1130	1	1147	1147	0	1950	19	25	19-25	23808778	23852628	19q_25q	74969378	75022989	19q_25q	19q_25q	19q_25q	171171	1.02	1
CIGENEomyV6.75582	CIGENEomyV6.82930	94.76	955	44	3	1	954	954	1	950	950	0	1806	24	27	24-27	25200304	25249843	24_27	28266522	28328211	24_27	24_27	24_27	171136.56	1	1
CIGENEomyV6.74526	CIGENEomyV6.81979	83.76	1355	130	13	1	1327	1327	1	1293	1293	0	2042	24	27	24-27	1068744	1126957	24_27	6189488	6241825	24_27	24_27	24_27	171037.92	1.01	1.04
CIGENEomyV6.35924	CIGENEomyV6.64374	99.64	833	3	0	1	833	833	157	989	989	0	1716	10	19	10-19	60039829	60051730	10q_19p	11883365	11896097	10q_19p	10q_19p	10q_19p	170982.24	1	0.84
CIGENEomyV6.12669	CIGENEomyV6.18012	85.79	1260	55	10	286	1459	1462	1	1222	1282	0	1992	4	5	4-5	18513252	18653967	4p_5q	63982783	64013299	4p_5q	4p_5q	4p_5q	170893.68	0.85	0.98
CIGENEomyV6.23862	CIGENEomyV6.61900	98.34	844	14	0	1	844	844	1	844	844	0	1737	7	18	7-18	15926802	16002335	7p_18p	17867580	17945516	7p_18p	7p_18p	7p_18p	170816.58	1	1
CIGENEomyV6.65583	CIGENEomyV6.78810	94.47	994	53	2	56	1047	1390	8	1001	1001	0	1805	19	25	19-25	40707932	40728058	19q_25q	57569431	57580367	19q_25q	19q_25q	19q_25q	170518.35	0.71	0.99
CIGENEomyV6.28403	CIGENEomyV6.84992	93.79	950	50	3	1	949	949	1	942	942	0	1816	8	28	8-28	50332867	50350755	8q_28	28967320	28994240	8q_28	8q_28	8q_28	170322.64	1	1.01
CIGENEomyV6.16312	CIGENEomyV6.86322	84.17	1295	169	12	1	1267	1271	58	1344	1347	0	2023	5	29	5-29	22345823	22375660	5p_29	14946002	14975650	5p_29	5p_29	5p_29	170275.91	1.01	0.95
CIGENEomyV6.16271	CIGENEomyV6.86301	86.47	1212	99	7	1	1152	1152	228	1434	1434	0	1969	5	29	5-29	21307550	21343558	5p_29	13728156	13864308	5p_29	5p_29	5p_29	170259.43	1.05	0.84
CIGENEomyV6.4447	CIGENEomyV6.9009	94.5	946	48	1	1	942	942	1	946	946	0	1800	2	3	2-3	14649530	14685976	2p_3p	24413324	24444760	2p_3p	2p_3p	2p_3p	170100	1	1
CIGENEomyV6.23806	CIGENEomyV6.61826	94.35	991	41	4	544	1530	1530	1	980	980	0	1802	7	18	7-18	14801342	14828096	7p_18p	16662843	16680026	7p_18p	7p_18p	7p_18p	170018.7	0.65	1.01
CIGENEomyV6.22152	CIGENEomyV6.80946	94.58	923	43	4	1	916	916	1	923	923	0	1796	6	26	6-26	67470212	67495473	6q_26	22474696	22498511	6q_26	6q_26	6q_26	169865.68	1	1
CIGENEomyV6.31861	CIGENEomyV6.56162	82.41	1592	182	21	4	1528	1528	44	1604	1604	0	2061	9	16	9-16	35395856	35414345	9q_16q	49794844	49813763	9q_16q	9q_16q	9q_16q	169847.01	1.03	0.98
CIGENEomyV6.48821	CIGENEomyV6.62645	87.81	1173	107	7	1	1162	1162	1	1148	1148	0	1934	14	18	14-18	25649801	25685586	14p_18q	36254753	36286960	14p_18q	14p_18q	14p_18q	169824.54	1	1.02
CIGENEomyV6.45397	CIGENEomyV6.58543	96.42	951	26	1	1	951	1057	289	1231	1281	0	1758	13	17	13-17	27151085	27200925	13p_17p	20070017	20150329	13p_17p	13p_17p	13p_17p	169506.36	0.9	0.74
CIGENEomyV6.42605	CIGENEomyV6.46127	98.58	845	12	0	1	845	845	1	845	845	0	1718	12	13	12-13	70564596	70584767	12q_13q	41069861	41090345	12q_13q	12q_13q	12q_13q	169360.44	1	1
CIGENEomyV6.31365	CIGENEomyV6.70552	82.55	1324	193	15	1	1305	1326	1	1305	1339	0	2051	9	21	9-21	22335697	22368197	9p_21q	46422634	46434064	9p_21q	9p_21q	9p_21q	169310.05	0.99	0.98
CIGENEomyV6.75116	CIGENEomyV6.82482	86.61	1374	138	18	1	1359	1359	1	1343	1343	0	1954	24	27	24-27	14093670	14113904	24_27	17176517	17194445	24_27	24_27	24_27	169235.94	1	1.01
CIGENEomyV6.75878	CIGENEomyV6.83229	96.8	906	23	2	1	904	904	1	902	902	0	1748	24	27	24-27	32566633	32574743	24_27	35461516	35469837	24_27	24_27	24_27	169206.4	1	1
CIGENEomyV6.23545	CIGENEomyV6.61617	97.54	852	15	1	230	1075	1075	1	852	852	0	1734	7	18	7-18	9758062	9772885	7p_18p	11825770	11838104	7p_18p	7p_18p	7p_18p	169134.36	0.79	1
CIGENEomyV6.34124	CIGENEomyV6.41589	90.44	1057	90	3	1	1057	1057	1	1046	1046	0	1870	10	12	10-12	13726140	13832617	10p_12p	44132830	44207046	10p_12p	10p_12p	10p_12p	169122.8	1	1.01
CIGENEomyV6.4542	CIGENEomyV6.9099	98.91	823	9	0	1	823	823	1	823	823	0	1709	2	3	2-3	16140404	16161891	2p_3p	25744869	25762994	2p_3p	2p_3p	2p_3p	169037.19	1	1
CIGENEomyV6.22204	CIGENEomyV6.80986	96.86	924	15	1	1	924	935	1	910	910	0	1744	6	26	6-26	68700685	68785062	6q_26	23571873	23651972	6q_26	6q_26	6q_26	168923.84	0.99	1.01
CIGENEomyV6.16858	CIGENEomyV6.40578	88.39	1128	68	5	1	1123	1123	611	1680	1680	0	1911	5	12	5-12	35963310	35978668	5p_12p	15942610	15957545	5p_12p	5p_12p	5p_12p	168913.29	1	0.67
CIGENEomyV6.45417	CIGENEomyV6.58567	92.39	1078	72	4	1	1071	1071	7	1081	1081	0	1828	13	17	13-17	27629827	27679516	13p_17p	20513890	20556312	13p_17p	13p_17p	13p_17p	168888.92	1	0.99
CIGENEomyV6.65457	CIGENEomyV6.78948	85.94	1266	108	6	219	1415	1476	65	1329	1448	0	1965	19	25	19-25	38078861	38106627	19q_25q	60097991	60193073	19q_25q	19q_25q	19q_25q	168872.1	0.85	0.87
CIGENEomyV6.42973	CIGENEomyV6.46306	98.06	876	12	1	1	876	876	1	871	871	0	1721	12	13	12-13	77921321	77930342	12q_13q	44396862	44406264	12q_13q	12q_13q	12q_13q	168761.26	1	1
CIGENEomyV6.23850	CIGENEomyV6.61885	95.32	919	39	2	1	917	981	1	917	920	0	1769	7	18	7-18	15568381	15602540	7p_18p	17488973	17531682	7p_18p	7p_18p	7p_18p	168621.08	0.93	1
CIGENEomyV6.34648	CIGENEomyV6.41026	86.95	1234	138	7	1	1221	1221	1	1224	1224	0	1939	10	12	10-12	30937483	30953693	10p_12p	26287652	26304534	10p_12p	10p_12p	10p_12p	168596.05	1	1
CIGENEomyV6.4696	CIGENEomyV6.9266	96.55	898	31	0	1	898	898	99	996	996	0	1745	2	3	2-3	19339669	19369627	2p_3p	29285176	29322009	2p_3p	2p_3p	2p_3p	168479.75	1	0.9
CIGENEomyV6.44801	CIGENEomyV6.58016	91.31	990	84	1	1	988	988	3	992	992	0	1842	13	17	13-17	13635147	13648312	13p_17p	9381253	9397204	13p_17p	13p_17p	13p_17p	168193.02	1	1
CIGENEomyV6.54739	CIGENEomyV6.67379	96.28	887	30	2	1	887	887	1	884	884	0	1746	16	20	16-20	16088144	16103286	16p_20p	18912130	18929956	16p_20p	16p_20p	16p_20p	168104.88	1	1
CIGENEomyV6.42452	CIGENEomyV6.45760	99.88	808	1	0	1	808	808	1	808	808	0	1683	12	13	12-13	67373213	67399559	12q_13q	34483908	34512322	12q_13q	12q_13q	12q_13q	168098.04	1	1
CIGENEomyV6.20622	CIGENEomyV6.38557	93.02	960	64	2	1	959	959	1	958	958	0	1803	6	11	6-11	28145418	28165490	6p_11q	57242599	57267986	6p_11q	6p_11q	6p_11q	167715.06	1	1
CIGENEomyV6.53304	CIGENEomyV6.69179	95.55	922	29	4	1	921	921	1	911	911	0	1755	15	21	15-21	52318201	52340292	15q_21p	15734615	15753763	15q_21p	15q_21p	15q_21p	167690.25	1	1.01
CIGENEomyV6.13394	CIGENEomyV6.41999	92.01	1540	98	11	1	1519	2027	1	1536	1895	0	1821	4	12	4-12	41608882	41660284	4p_12q	57258082	57305490	4p_12q	4p_12q	4p_12q	167550.21	0.75	0.81
CIGENEomyV6.43096	CIGENEomyV6.46447	98.82	931	10	1	1	931	931	1	930	930	0	1695	12	13	12-13	79471027	79483587	12q_13q	46045695	46053272	12q_13q	12q_13q	12q_13q	167499.9	1	1
CIGENEomyV6.42213	CIGENEomyV6.45524	98.2	835	15	0	1	835	835	1	835	835	0	1705	12	13	12-13	62046155	62063783	12q_13q	29756160	29779612	12q_13q	12q_13q	12q_13q	167431	1	1
CIGENEomyV6.50066	CIGENEomyV6.77773	97.93	870	17	1	1	869	869	1	870	870	0	1709	14	25	14-25	53659377	53674671	14q_25p	26385269	26401713	14q_25p	14q_25p	14q_25p	167362.37	1	1
CIGENEomyV6.4906	CIGENEomyV6.9500	98.78	823	10	0	1	823	854	1	823	824	0	1694	2	3	2-3	24064089	24077175	2p_3p	34120228	34135431	2p_3p	2p_3p	2p_3p	167333.32	0.96	1
CIGENEomyV6.4876	CIGENEomyV6.9470	96.29	862	32	0	1	862	862	1	862	862	0	1737	2	3	2-3	23473303	23540812	2p_3p	33550421	33598194	2p_3p	2p_3p	2p_3p	167255.73	1	1
CIGENEomyV6.3922	CIGENEomyV6.8501	97.11	1037	26	2	1	1033	1033	455	1491	1491	0	1721	2	3	2-3	5570975	5581528	2p_3p	14831309	14842414	2p_3p	2p_3p	2p_3p	167126.31	1	0.69
CIGENEomyV6.29319	CIGENEomyV6.84244	91.44	993	85	0	1	993	1007	1	993	994	0	1827	8	28	8-28	71131932	71136300	8q_28	8930014	8946442	8q_28	8q_28	8q_28	167060.88	0.99	1
CIGENEomyV6.70986	CIGENEomyV6.9861	85.71	1491	201	4	1	1488	1488	1	1482	1482	0	1947	22	3	3-22	5193735	5380915	3q_22p	45171759	45345435	3q_22p	3q_22p	3q_22p	166877.37	1	1
CIGENEomyV6.48903	CIGENEomyV6.62533	91.57	1008	67	6	1	1004	1044	1	994	994	0	1821	14	18	14-18	27415871	27553431	14p_18q	34216166	34313960	14p_18q	14p_18q	14p_18q	166748.97	0.96	1.01
CIGENEomyV6.17732	CIGENEomyV6.773	96.95	886	27	0	239	1124	1233	14	899	908	0	1719	5	1	1-5	57313481	57334197	1p_5q	16193542	16219072	1p_5q	1p_5q	1p_5q	166657.05	0.72	0.98
CIGENEomyV6.53302	CIGENEomyV6.69181	98.44	831	13	0	1	831	1487	478	1308	1308	0	1691	15	21	15-21	52294431	52326906	15q_21p	15764228	15829199	15q_21p	15q_21p	15q_21p	166462.04	0.56	0.64
CIGENEomyV6.48762	CIGENEomyV6.62680	93.1	956	66	0	1	956	956	1	956	956	0	1786	14	18	14-18	24448140	24485486	14p_18q	37426390	37460050	14p_18q	14p_18q	14p_18q	166276.6	1	1
CIGENEomyV6.2255	CIGENEomyV6.72798	93.38	921	58	1	15	932	932	1	921	921	0	1779	1	23	1-23	56317993	56351690	1q_23	1268918	1300430	1q_23	1q_23	1q_23	166123.02	0.99	1
CIGENEomyV6.34716	CIGENEomyV6.40926	87.89	1049	109	3	1	1035	1037	1	1045	1046	0	1889	10	12	10-12	32286356	32324733	10p_12p	24774563	24811331	10p_12p	10p_12p	10p_12p	166024.21	1.01	1
CIGENEomyV6.4052	CIGENEomyV6.8642	96.04	859	28	1	1	853	857	1	859	860	0	1726	2	3	2-3	7190708	7225768	2p_3p	16923060	16941662	2p_3p	2p_3p	2p_3p	165765.04	1	1
CIGENEomyV6.36751	CIGENEomyV6.52051	87.32	1104	71	6	1	1070	1070	824	1892	1892	0	1897	11	15	11-15	8040517	8055756	11p_15p	16306780	16351180	11p_15p	11p_15p	11p_15p	165646.04	1.03	0.58
CIGENEomyV6.24943	CIGENEomyV6.59685	94.17	926	51	1	1	926	926	1	923	923	0	1758	7	17	7-17	49811291	49844114	7q_17q	48185402	48227956	7q_17q	7q_17q	7q_17q	165550.86	1	1
CIGENEomyV6.42509	CIGENEomyV6.45818	99.13	803	7	0	1	803	803	1	803	803	0	1670	12	13	12-13	68573737	68657037	12q_13q	35742770	35840782	12q_13q	12q_13q	12q_13q	165547.1	1	1
CIGENEomyV6.28972	CIGENEomyV6.84517	82.64	1296	147	16	1	1284	1284	158	1387	1387	0	2003	8	28	8-28	64599995	64660114	8q_28	15623194	15705898	8q_28	8q_28	8q_28	165527.92	1	0.92
CIGENEomyV6.21929	CIGENEomyV6.80734	99.02	818	8	0	1	818	818	1	818	818	0	1671	6	26	6-26	62894946	62927064	6q_26	17989922	18017879	6q_26	6q_26	6q_26	165462.42	1	1
CIGENEomyV6.31297	CIGENEomyV6.70463	90.23	1003	91	5	1	1002	1002	1	997	997	0	1833	9	21	9-21	20581951	20649197	9p_21q	44606528	44656317	9p_21q	9p_21q	9p_21q	165391.59	1	1
CIGENEomyV6.34129	CIGENEomyV6.41575	95.02	944	43	2	1	944	944	139	1078	1078	0	1740	10	12	10-12	14135570	14491410	10p_12p	43347041	43714867	10p_12p	10p_12p	10p_12p	165334.8	1	0.87
CIGENEomyV6.2838	CIGENEomyV6.73372	84.13	1248	128	11	1	1240	1240	1	1186	1186	0	1963	1	23	1-23	71673276	71700630	1q_23	16376856	16416373	1q_23	1q_23	1q_23	165147.19	1	1.04
CIGENEomyV6.44818	CIGENEomyV6.58034	88.24	1131	55	6	1	1131	1131	1	1053	1053	0	1866	13	17	13-17	13851651	13887437	13p_17p	9645055	9683859	13p_17p	13p_17p	13p_17p	164655.84	0.99	1.07
CIGENEomyV6.29341	CIGENEomyV6.84231	90.93	959	79	2	1	959	1036	14	964	1017	0	1810	8	28	8-28	71428666	71497714	8q_28	8686331	8725713	8q_28	8q_28	8q_28	164583.3	0.92	0.94
CIGENEomyV6.32194	CIGENEomyV6.56116	95.86	870	27	2	1	870	870	1	861	861	0	1713	9	16	9-16	45225712	45251051	9q_16q	49176504	49217399	9q_16q	9q_16q	9q_16q	164208.18	1	1.01
CIGENEomyV6.29399	CIGENEomyV6.84182	93.14	918	56	3	1	918	948	205	1115	1393	0	1763	8	28	8-28	72783454	72905639	8q_28	7631461	7724821	8q_28	8q_28	8q_28	164205.82	0.97	0.66
CIGENEomyV6.32662	CIGENEomyV6.55676	88.9	1036	106	4	1	1028	1028	1	1035	1035	0	1846	9	16	9-16	55696963	55774226	9q_16q	39632407	39678935	9q_16q	9q_16q	9q_16q	164109.4	1	1
CIGENEomyV6.2052	CIGENEomyV6.6893	91.94	930	72	1	1	927	927	1	930	930	0	1784	1	2	1-2	49635728	49661113	1p_2q	78720177	78753334	1p_2q	1p_2q	1p_2q	164020.96	1	1
CIGENEomyV6.25087	CIGENEomyV6.59514	94.65	897	46	1	1	895	895	1	897	897	0	1731	7	17	7-17	52532466	52617541	7q_17q	45212277	45279341	7q_17q	7q_17q	7q_17q	163839.15	1	1
CIGENEomyV6.34842	CIGENEomyV6.40776	88.54	1038	98	3	1	1038	1042	1	1017	1022	0	1850	10	12	10-12	36040959	36249913	10p_12p	21085733	21319798	10p_12p	10p_12p	10p_12p	163799	0.99	1.01
CIGENEomyV6.2304	CIGENEomyV6.72837	91.17	985	75	4	1	983	983	1	975	975	0	1796	1	23	1-23	57820689	57835923	1q_23	2236064	2250535	1q_23	1q_23	1q_23	163741.32	1	1.01
CIGENEomyV6.45101	CIGENEomyV6.58343	91.42	1107	79	8	1	1099	1099	1	1099	1099	0	1791	13	17	13-17	20280229	20348433	13p_17p	15936668	15994841	13p_17p	13p_17p	13p_17p	163733.22	1	1
CIGENEomyV6.21555	CIGENEomyV6.80334	94.25	922	19	1	448	1335	1335	3	924	924	0	1737	6	26	6-26	52847579	52969224	6q_26	7664471	7738183	6q_26	6q_26	6q_26	163712.25	0.69	1
CIGENEomyV6.14686	CIGENEomyV6.27670	85.02	1108	162	1	81	1184	1184	1	1108	1108	0	1925	4	8	4-8	75296302	75333071	4q_8p	29042427	29088329	4q_8p	4q_8p	4q_8p	163663.5	0.93	1
CIGENEomyV6.42816	CIGENEomyV6.45899	99	803	8	0	1	803	803	48	850	850	0	1652	12	13	12-13	74216294	74233262	12q_13q	37458278	37475064	12q_13q	12q_13q	12q_13q	163548	1	0.94
CIGENEomyV6.21493	CIGENEomyV6.80279	94.3	913	48	1	1	913	929	142	1050	1055	0	1734	6	26	6-26	50933752	51013570	6q_26	5895579	5968335	6q_26	6q_26	6q_26	163516.2	0.98	0.86
CIGENEomyV6.21661	CIGENEomyV6.80424	99.5	799	4	0	1	799	799	1	799	799	0	1643	6	26	6-26	55902675	55920553	6q_26	10123566	10147877	6q_26	6q_26	6q_26	163478.5	1	1
CIGENEomyV6.52929	CIGENEomyV6.69566	93.38	922	61	0	1	922	922	1	922	922	0	1750	15	21	15-21	44223053	44244410	15q_21p	23959319	23990260	15q_21p	15q_21p	15q_21p	163415	1	1
CIGENEomyV6.34832	CIGENEomyV6.40786	92.86	980	67	1	1	977	981	1	980	982	0	1759	10	12	10-12	35728262	35778854	10p_12p	21538400	21579934	10p_12p	10p_12p	10p_12p	163340.74	1	1
CIGENEomyV6.2315	CIGENEomyV6.72853	87.27	1100	113	7	26	1104	1104	1	1094	1094	0	1868	1	23	1-23	58004630	58087138	1q_23	2446637	2552598	1q_23	1q_23	1q_23	163020.36	0.99	1
CIGENEomyV6.13834	CIGENEomyV6.27059	87.97	1072	120	4	161	1232	1232	1	1063	1063	0	1853	4	8	4-8	54616138	54672229	4q_8p	12787742	12812530	4q_8p	4q_8p	4q_8p	163008.41	0.87	1
CIGENEomyV6.30929	CIGENEomyV6.70096	83.13	1286	154	15	975	2238	2238	2	1246	1246	0	1960	9	21	9-21	10896406	10927453	9p_21q	34844976	34921088	9p_21q	9p_21q	9p_21q	162934.8	0.57	1.02
CIGENEomyV6.54817	CIGENEomyV6.66782	95.68	973	38	1	1	973	973	2	970	970	0	1702	16	20	16-20	17791866	17835024	16p_20p	5107354	5129626	16p_20p	16p_20p	16p_20p	162847.36	1	1
CIGENEomyV6.20219	CIGENEomyV6.38169	84.79	1203	158	7	49	1242	1242	1	1187	1187	0	1919	6	11	6-11	18554943	18569352	6p_11q	47555393	47573760	6p_11q	6p_11q	6p_11q	162712.01	0.96	1.01
CIGENEomyV6.29131	CIGENEomyV6.84395	99.25	796	6	0	1	796	799	1	796	1017	0	1638	8	28	8-28	68310074	68387970	8q_28	11482532	11569745	8q_28	8q_28	8q_28	162571.5	1	0.78
CIGENEomyV6.34059	CIGENEomyV6.41626	87.59	1120	113	10	1	1110	1110	1	1104	1104	0	1855	10	12	10-12	11588099	11613639	10p_12p	46217303	46238920	10p_12p	10p_12p	10p_12p	162479.45	1	1.01
CIGENEomyV6.43014	CIGENEomyV6.46356	95.89	900	24	1	1	887	887	1	900	900	0	1694	12	13	12-13	78469497	78487829	12q_13q	45078613	45090576	12q_13q	12q_13q	12q_13q	162437.66	1.01	1
CIGENEomyV6.28423	CIGENEomyV6.84969	87.28	1124	113	9	1	1107	1107	1	1111	1111	0	1859	8	28	8-28	50548553	50588937	8q_28	28691220	28717401	8q_28	8q_28	8q_28	162253.52	1.01	1
CIGENEomyV6.4678	CIGENEomyV6.9245	96.8	905	24	3	1	900	900	1	905	905	0	1676	2	3	2-3	18914493	18970700	2p_3p	28826865	28883166	2p_3p	2p_3p	2p_3p	162236.8	1	1
CIGENEomyV6.32857	CIGENEomyV6.55506	92.26	1034	61	7	1	1027	1027	1	1022	1022	0	1757	9	16	9-16	59198870	59231153	9q_16q	36624189	36644272	9q_16q	9q_16q	9q_16q	162100.82	1	1
CIGENEomyV6.31707	CIGENEomyV6.56288	80.03	1542	257	14	1	1521	1538	22	1533	1550	0	2024	9	16	9-16	32693382	32706859	9q_16q	52404532	52416733	9q_16q	9q_16q	9q_16q	161980.72	0.99	0.99
CIGENEomyV6.23351	CIGENEomyV6.61496	97.87	1173	25	0	1	1173	1173	1	1173	1173	0	1654	7	18	7-18	6362471	6385780	7p_18p	9693364	9707736	7p_18p	7p_18p	7p_18p	161876.98	1	1
CIGENEomyV6.32644	CIGENEomyV6.55692	83.83	1212	153	10	1	1189	1189	1	1192	1192	0	1929	9	16	9-16	55214034	55328367	9q_16q	40012992	40085418	9q_16q	9q_16q	9q_16q	161708.07	1.01	1.01
CIGENEomyV6.54582	CIGENEomyV6.67129	92.56	914	67	1	1	913	1215	1	914	948	0	1745	16	20	16-20	12609397	12618058	16p_20p	13503765	13507767	16p_20p	16p_20p	16p_20p	161517.2	0.75	0.96
CIGENEomyV6.42148	CIGENEomyV6.45459	96.64	863	19	1	524	1386	1386	1	853	853	0	1670	12	13	12-13	60288482	60343213	12q_13q	28553537	28600610	12q_13q	12q_13q	12q_13q	161388.8	0.62	1.01
CIGENEomyV6.10905	CIGENEomyV6.71657	86.53	1121	134	7	1	1111	1111	1	1114	1114	0	1865	3	22	3-22	71912373	71928435	3q_22q	23994511	24012048	3q_22q	3q_22q	3q_22q	161378.45	1	1
CIGENEomyV6.20600	CIGENEomyV6.38536	89.95	1114	106	5	1	1110	1110	1	1112	1112	0	1794	6	11	6-11	27491291	27535495	6p_11q	56594338	56642345	6p_11q	6p_11q	6p_11q	161370.3	1	1
CIGENEomyV6.31703	CIGENEomyV6.56296	93	971	68	0	1	971	971	1	971	971	0	1735	9	16	9-16	32585901	32604587	9q_16q	52483139	52496171	9q_16q	9q_16q	9q_16q	161355	1	1
CIGENEomyV6.50313	CIGENEomyV6.78017	97.31	817	18	1	77	889	1436	2	818	828	0	1658	14	25	14-25	60412779	60475097	14q_25p	34147367	34160053	14q_25p	14q_25p	14q_25p	161339.98	0.57	0.99
CIGENEomyV6.13368	CIGENEomyV6.42070	95.18	996	38	4	1	989	989	1	993	993	0	1694	4	12	4-12	41010836	41075684	4p_12q	58491049	58514102	4p_12q	4p_12q	4p_12q	161234.92	1	1
CIGENEomyV6.67860	CIGENEomyV6.73678	90.01	991	92	2	1	987	998	2	989	1176	0	1791	20	23	20-23	30574994	30604447	20q_23	27126872	27164645	20q_23	20q_23	20q_23	161207.91	0.99	0.84
CIGENEomyV6.2724	CIGENEomyV6.73258	86.98	1152	122	3	1	1151	1151	1	1125	1125	0	1852	1	23	1-23	68139351	68191614	1q_23	12991790	13047677	1q_23	1q_23	1q_23	161086.96	1	1.02
CIGENEomyV6.2911	CIGENEomyV6.73433	86.9	1061	134	3	1	1058	1059	1	1059	1061	0	1853	1	23	1-23	73464857	73474563	1q_23	18513053	18532682	1q_23	1q_23	1q_23	161025.7	1	1
CIGENEomyV6.16698	CIGENEomyV6.86683	96.12	850	33	0	1	850	850	1	850	850	0	1675	5	29	5-29	32993834	33004378	5p_29	26071647	26084771	5p_29	5p_29	5p_29	161001	1	1
CIGENEomyV6.65154	CIGENEomyV6.79255	84.72	1158	159	7	368	1520	1523	1	1145	1148	0	1900	19	25	19-25	30579428	30604111	19q_25q	67986391	68007780	19q_25q	19q_25q	19q_25q	160968	0.76	1
CIGENEomyV6.31648	CIGENEomyV6.56330	92.75	938	57	2	1	929	929	1	936	936	0	1735	9	16	9-16	30954102	31318414	9q_16q	53754376	54260337	9q_16q	9q_16q	9q_16q	160921.25	1.01	1
CIGENEomyV6.50172	CIGENEomyV6.77878	98.24	797	14	0	1	797	797	1	797	797	0	1637	14	25	14-25	56376154	56394020	14q_25p	29195257	29212481	14q_25p	14q_25p	14q_25p	160818.88	1	1
CIGENEomyV6.42732	CIGENEomyV6.45985	92.82	1101	65	2	236	1336	1336	1	1087	1087	0	1732	12	13	12-13	72804053	72909292	12q_13q	38745213	38823231	12q_13q	12q_13q	12q_13q	160764.24	0.82	1.01
CIGENEomyV6.21685	CIGENEomyV6.80398	98.62	797	11	0	1	797	797	1	797	797	0	1630	6	26	6-26	57003408	57074001	6q_26	9011593	9095051	6q_26	6q_26	6q_26	160750.6	1	1
CIGENEomyV6.21683	CIGENEomyV6.80403	98.87	797	9	0	1	797	797	1	797	797	0	1624	6	26	6-26	56706658	56784532	6q_26	9303105	9393708	6q_26	6q_26	6q_26	160564.88	1	1
CIGENEomyV6.42858	CIGENEomyV6.46168	95.81	884	34	1	1	884	884	1	881	881	0	1674	12	13	12-13	74795943	74811254	12q_13q	41710189	41724565	12q_13q	12q_13q	12q_13q	160385.94	1	1
CIGENEomyV6.37684	CIGENEomyV6.52359	95.91	855	34	1	1	854	854	1	855	855	0	1672	11	15	11-15	33596161	33629008	11p_15p	24451452	24469310	11p_15p	11p_15p	11p_15p	160361.52	1	1
CIGENEomyV6.75227	CIGENEomyV6.82602	91.09	943	82	2	1	941	941	1	943	943	0	1760	24	27	24-27	16924598	16943094	24_27	20150855	20163385	24_27	24_27	24_27	160318.4	1	1
CIGENEomyV6.34700	CIGENEomyV6.40949	83.7	1135	164	5	1	1126	1126	10	1132	1132	0	1914	10	12	10-12	32098242	32110859	10p_12p	25067217	25086294	10p_12p	10p_12p	10p_12p	160201.8	1	1
CIGENEomyV6.12572	CIGENEomyV6.17930	93.01	916	49	6	1	908	908	1	909	909	0	1722	4	5	4-5	16281862	16309262	4p_5q	61789654	61810115	4p_5q	4p_5q	4p_5q	160163.22	1	1
CIGENEomyV6.1132	CIGENEomyV6.5963	85.18	1154	113	3	12	1108	1108	14	1166	1166	0	1880	1	2	1-2	24749531	24874753	1p_2q	54391951	54473097	1p_2q	1p_2q	1p_2q	160138.4	1.04	0.99
CIGENEomyV6.22241	CIGENEomyV6.81029	96.97	824	22	2	1	821	821	8	831	831	0	1651	6	26	6-26	69685816	69708448	6q_26	24592677	24605950	6q_26	6q_26	6q_26	160097.47	1	0.99
CIGENEomyV6.35026	CIGENEomyV6.86848	92.7	932	56	3	347	1278	1278	1	920	920	0	1727	10	29	10-29	40594232	40630094	10p_29	29244049	29262708	10p_29	10p_29	10p_29	160092.9	0.73	1.01
CIGENEomyV6.28864	CIGENEomyV6.84622	99.49	778	4	0	1	778	778	1	778	778	0	1609	8	28	8-28	61542223	61559522	8q_28	18798704	18812331	8q_28	8q_28	8q_28	160079.41	1	1
CIGENEomyV6.28315	CIGENEomyV6.85101	82.42	1200	170	12	55	1236	1236	1	1177	1177	0	1942	8	28	8-28	48245354	48264439	8q_28	30975958	30984502	8q_28	8q_28	8q_28	160059.64	0.96	1.01
CIGENEomyV6.28188	CIGENEomyV6.85240	83.08	1123	178	4	7	1127	1165	1	1113	1115	0	1925	8	28	8-28	45895321	45918516	8q_28	33015642	33045397	8q_28	8q_28	8q_28	159929	0.96	1
CIGENEomyV6.4944	CIGENEomyV6.9531	92.82	1058	60	8	1	1053	1064	1	1047	1196	0	1723	2	3	2-3	24691244	24756139	2p_3p	34726853	34788736	2p_3p	2p_3p	2p_3p	159928.86	0.99	0.88
CIGENEomyV6.75103	CIGENEomyV6.82461	99.49	781	4	0	1	781	781	13	793	793	0	1607	24	27	24-27	13958809	13978386	24_27	16970246	16986416	24_27	24_27	24_27	159880.43	1	0.98
CIGENEomyV6.42886	CIGENEomyV6.46205	99.48	773	4	0	1	773	773	1	773	773	0	1607	12	13	12-13	75347286	75410554	12q_13q	42290565	42344461	12q_13q	12q_13q	12q_13q	159864.36	1	1
CIGENEomyV6.45138	CIGENEomyV6.58389	99.48	765	4	0	1	765	770	162	926	1043	0	1607	13	17	13-17	21361577	21378785	13p_17p	17093583	17103081	13p_17p	13p_17p	13p_17p	159864.36	0.99	0.73
CIGENEomyV6.36066	CIGENEomyV6.64232	99.18	852	7	0	1	852	1033	1	852	921	0	1610	10	19	10-19	64264666	64280412	10q_19p	7880663	7889762	10q_19p	10q_19p	10q_19p	159679.8	0.82	0.93
CIGENEomyV6.37555	CIGENEomyV6.52459	84.97	1098	142	8	1	1086	1086	1	1087	1087	0	1879	11	15	11-15	30014364	30302962	11p_15p	27452687	27723147	11p_15p	11p_15p	11p_15p	159658.63	1	1
CIGENEomyV6.11342	CIGENEomyV6.71225	90.53	972	91	1	1	972	972	1	971	971	0	1763	3	22	3-22	79615771	79620516	3q_22p	12179051	12183255	3q_22p	3q_22p	3q_22p	159604.39	1	1
CIGENEomyV6.65099	CIGENEomyV6.79319	81.96	1447	160	19	1	1372	1372	52	1472	1472	0	1947	19	25	19-25	28988154	29012470	19q_25q	69709871	69758646	19q_25q	19q_25q	19q_25q	159576.12	1.04	0.97
CIGENEomyV6.53451	CIGENEomyV6.69017	96.74	858	24	2	1	854	854	12	869	869	0	1649	15	21	15-21	55079257	55101134	15q_21p	12922930	12951550	15q_21p	15q_21p	15q_21p	159524.26	1	0.99
CIGENEomyV6.21849	CIGENEomyV6.80640	99.22	772	6	0	1	772	772	1	772	772	0	1605	6	26	6-26	60967398	60990082	6q_26	15805004	15818893	6q_26	6q_26	6q_26	159248.1	1	1
CIGENEomyV6.65317	CIGENEomyV6.79070	89.93	963	95	1	1	963	963	1	961	961	0	1770	19	25	19-25	35417367	35433803	19q_25q	62869473	62898022	19q_25q	19q_25q	19q_25q	159176.1	1	1
CIGENEomyV6.31140	CIGENEomyV6.70295	87.69	1056	96	4	1	1044	1044	1	1034	1034	0	1813	9	21	9-21	16037404	16107436	9p_21q	39910533	39942694	9p_21q	9p_21q	9p_21q	158981.97	1.01	1.02
CIGENEomyV6.34657	CIGENEomyV6.41017	94.18	911	51	1	1	909	909	1	911	911	0	1688	10	12	10-12	31024921	31035092	10p_12p	26180457	26200657	10p_12p	10p_12p	10p_12p	158975.84	1	1
CIGENEomyV6.48269	CIGENEomyV6.63307	97.14	1188	34	0	166	1353	1353	1	1188	1188	0	1636	14	18	14-18	12497837	12528345	14p_18q	51506069	51529809	14p_18q	14p_18q	14p_18q	158921.04	0.88	1
CIGENEomyV6.14017	CIGENEomyV6.27279	93.37	1071	57	7	1	1060	1061	869	1936	1938	0	1702	4	8	4-8	60349536	60469354	4q_8p	18547839	18695836	4q_8p	4q_8p	4q_8p	158915.74	1	0.55
CIGENEomyV6.31255	CIGENEomyV6.70430	88.05	1096	80	11	1	1083	1083	1	1058	1058	0	1804	9	21	9-21	19087821	19123728	9p_21q	42964682	43037385	9p_21q	9p_21q	9p_21q	158842.2	1	1.03
CIGENEomyV6.50348	CIGENEomyV6.78053	91.71	977	74	3	1	971	971	1	976	976	0	1731	14	25	14-25	61611092	61723649	14q_25p	35386279	35512790	14q_25p	14q_25p	14q_25p	158750.01	1	1
CIGENEomyV6.49986	CIGENEomyV6.77724	89.26	1024	88	4	1	1018	1036	106	1113	1137	0	1778	14	25	14-25	52408129	52512491	14q_25p	25090488	25168414	14q_25p	14q_25p	14q_25p	158704.28	0.98	0.9
CIGENEomyV6.48719	CIGENEomyV6.62731	89.29	971	85	8	1	967	967	1	956	956	0	1777	14	18	14-18	23241229	23395419	14p_18q	38698822	38705907	14p_18q	14p_18q	14p_18q	158668.33	1	1.01
CIGENEomyV6.23905	CIGENEomyV6.61936	94.95	851	41	2	2	850	850	402	1252	1252	0	1670	7	18	7-18	17174340	17219815	7p_18p	19055245	19101006	7p_18p	7p_18p	7p_18p	158566.5	1	0.68
CIGENEomyV6.42284	CIGENEomyV6.45588	95.09	855	37	2	1	855	855	95	944	944	0	1667	12	13	12-13	63829620	63855356	12q_13q	31001329	31029202	12q_13q	12q_13q	12q_13q	158515.03	1	0.9
CIGENEomyV6.14030	CIGENEomyV6.27282	95.89	827	33	1	1	826	826	3	829	829	0	1653	4	8	4-8	60612350	60631334	4q_8p	18880920	18913143	4q_8p	4q_8p	4q_8p	158506.17	1	1
CIGENEomyV6.54578	CIGENEomyV6.67123	89.29	1027	107	2	1	1027	1027	2	1025	1025	0	1775	16	20	16-20	12517182	12542282	16p_20p	13407514	13437425	16p_20p	16p_20p	16p_20p	158489.75	1	1
CIGENEomyV6.12977	CIGENEomyV6.18344	96.22	847	29	1	1	844	844	2	848	848	0	1646	4	5	4-5	27714559	27731294	4p_5q	72627433	72644231	4p_5q	4p_5q	4p_5q	158378.12	1	1
CIGENEomyV6.11341	CIGENEomyV6.71224	90.42	981	89	2	1	981	981	1	976	976	0	1751	3	22	3-22	79564992	79568890	3q_22p	12128342	12159039	3q_22p	3q_22p	3q_22p	158325.42	1	1
CIGENEomyV6.49803	CIGENEomyV6.77452	89.24	985	102	4	1	983	986	110	1092	1107	0	1773	14	25	14-25	48754331	48775990	14q_25p	21145567	21176015	14q_25p	14q_25p	14q_25p	158222.52	0.99	0.89
CIGENEomyV6.34470	CIGENEomyV6.41256	86.54	1144	133	10	1	1137	1137	1	1130	1130	0	1828	10	12	10-12	24698197	24750210	10p_12p	32543420	32590793	10p_12p	10p_12p	10p_12p	158195.12	1	1
CIGENEomyV6.49995	CIGENEomyV6.77731	91.32	933	77	2	56	986	986	326	1256	1256	0	1731	14	25	14-25	52635069	52652386	14q_25p	25322230	25360462	14q_25p	14q_25p	14q_25p	158074.92	0.94	0.74
CIGENEomyV6.4064	CIGENEomyV6.8649	94.97	875	33	4	1	866	866	1	873	873	0	1664	2	3	2-3	7394014	7429870	2p_3p	17103074	17147100	2p_3p	2p_3p	2p_3p	158030.08	1.01	1
CIGENEomyV6.54545	CIGENEomyV6.67080	94.24	850	47	1	1	848	848	1	850	850	0	1676	16	20	16-20	11412637	11426785	16p_20p	12080927	12102830	16p_20p	16p_20p	16p_20p	157946.24	1	1
CIGENEomyV6.36031	CIGENEomyV6.64270	95.75	870	11	3	1	870	872	42	885	904	0	1649	10	19	10-19	63484870	63499559	10q_19p	8685505	8706378	10q_19p	10q_19p	10q_19p	157891.75	0.99	0.96
CIGENEomyV6.65562	CIGENEomyV6.78840	90.88	976	81	5	736	1707	1707	26	997	997	0	1736	19	25	19-25	40298993	40369136	19q_25q	58097914	58120408	19q_25q	19q_25q	19q_25q	157767.68	0.57	0.97
CIGENEomyV6.75335	CIGENEomyV6.82693	96.47	821	24	1	1	821	861	1	816	1320	0	1633	24	27	24-27	18971539	19115392	24_27	22327229	22444342	24_27	24_27	24_27	157535.51	0.95	0.62
CIGENEomyV6.32626	CIGENEomyV6.55703	85.98	1163	104	9	1	1112	1112	1	1155	1155	0	1831	9	16	9-16	54896129	54912874	9q_16q	40333194	40351842	9q_16q	9q_16q	9q_16q	157429.38	1.04	1
CIGENEomyV6.34278	CIGENEomyV6.41457	82.71	1168	174	9	1	1147	1153	1	1161	1179	0	1903	10	12	10-12	18896200	18962792	10p_12p	38651528	38680135	10p_12p	10p_12p	10p_12p	157397.13	1.01	0.98
CIGENEomyV6.34560	CIGENEomyV6.41130	88.12	1035	109	7	38	1068	1068	1	1025	1025	0	1785	10	12	10-12	28514549	28523844	10p_12p	28716615	28723489	10p_12p	10p_12p	10p_12p	157294.2	0.96	1
CIGENEomyV6.34209	CIGENEomyV6.41519	97.37	798	21	0	8	805	805	6	803	803	0	1615	10	12	10-12	16451796	16483763	10p_12p	41464213	41508299	10p_12p	10p_12p	10p_12p	157252.55	0.99	0.99
CIGENEomyV6.23547	CIGENEomyV6.61619	96.04	985	33	3	1	979	979	1	985	985	0	1636	7	18	7-18	9774958	9835372	7p_18p	11854646	11871059	7p_18p	7p_18p	7p_18p	157121.44	1	1
CIGENEomyV6.21629	CIGENEomyV6.80480	89.37	1025	83	8	30	1042	1042	1	1011	1011	0	1758	6	26	6-26	54560820	54572650	6q_26	11583407	11646399	6q_26	6q_26	6q_26	157112.46	0.98	1.01
CIGENEomyV6.13401	CIGENEomyV6.41996	98.72	782	10	0	202	983	983	1	782	782	0	1591	4	12	4-12	41713797	41773526	4p_12q	57192455	57229596	4p_12q	4p_12q	4p_12q	157063.52	0.8	1
CIGENEomyV6.48894	CIGENEomyV6.62567	85.54	1079	134	8	13	1072	1075	236	1311	1343	0	1835	14	18	14-18	26980741	26995179	14p_18q	34870809	34891172	14p_18q	14p_18q	14p_18q	156965.9	1	0.8
CIGENEomyV6.44730	CIGENEomyV6.57958	99.09	767	7	0	1	767	767	1	767	767	0	1584	13	17	13-17	12542842	12559245	13p_17p	8204312	8219559	13p_17p	13p_17p	13p_17p	156958.56	1	1
CIGENEomyV6.17012	CIGENEomyV6.40378	95.63	824	36	0	1	824	824	1	824	824	0	1641	5	12	5-12	39051038	39087860	5p_12p	12593675	12637615	5p_12p	5p_12p	5p_12p	156928.83	1	1
CIGENEomyV6.21847	CIGENEomyV6.80636	98.99	794	7	1	1	794	1348	1	793	793	0	1585	6	26	6-26	60811369	60957618	6q_26	15672820	15787961	6q_26	6q_26	6q_26	156899.15	0.59	1
CIGENEomyV6.44930	CIGENEomyV6.58169	97.18	851	14	2	1	851	851	1	841	841	0	1613	13	17	13-17	17114748	17174234	13p_17p	12997364	13045421	13p_17p	13p_17p	13p_17p	156751.34	1	1.01
CIGENEomyV6.31198	CIGENEomyV6.70322	96.88	800	25	0	1	800	800	1	800	800	0	1617	9	21	9-21	17980742	18005452	9p_21q	41085998	41106654	9p_21q	9p_21q	9p_21q	156654.96	1	1
CIGENEomyV6.24034	CIGENEomyV6.62051	85.65	1073	123	5	1	1068	1078	1	1047	1047	0	1828	7	18	7-18	21491252	21516599	7p_18p	23514748	23519722	7p_18p	7p_18p	7p_18p	156568.2	0.99	1.02
CIGENEomyV6.65467	CIGENEomyV6.78942	86.87	1196	139	9	1	1193	1193	1	1181	1181	0	1801	19	25	19-25	38427984	38474862	19q_25q	59977183	60011115	19q_25q	19q_25q	19q_25q	156452.87	0.99	1.01
CIGENEomyV6.23981	CIGENEomyV6.62004	96.72	854	28	0	1	854	854	1	854	854	0	1617	7	18	7-18	19106021	19136661	7p_18p	21035056	21120397	7p_18p	7p_18p	7p_18p	156396.24	1	1
CIGENEomyV6.12277	CIGENEomyV6.5593	87.2	1039	106	3	1	1038	1093	2	1014	1161	0	1793	4	2	2-4	9059433	9074339	2q_4p	44232240	44244566	2q_4p	2q_4p	2q_4p	156349.6	0.95	0.89
CIGENEomyV6.74856	CIGENEomyV6.82236	95.5	867	14	2	1	846	846	1	863	863	0	1637	24	27	24-27	9128727	9158876	24_27	12087726	12110930	24_27	24_27	24_27	156333.5	1.02	1
CIGENEomyV6.23896	CIGENEomyV6.61933	88.71	992	72	5	1	957	998	183	1169	1194	0	1761	7	18	7-18	16844340	16900583	7p_18p	18780166	18810032	7p_18p	7p_18p	7p_18p	156218.31	0.99	0.83
CIGENEomyV6.12730	CIGENEomyV6.18086	95.18	851	17	2	1	831	831	1	847	847	0	1640	4	5	4-5	20750471	21086286	4p_5q	66226165	66552537	4p_5q	4p_5q	4p_5q	156095.2	1.02	1
CIGENEomyV6.53092	CIGENEomyV6.69409	85.95	1103	127	6	1	1075	1453	1	1103	1138	0	1815	15	21	15-21	48549820	48574693	15q_21p	19913532	19945018	15q_21p	15q_21p	15q_21p	155999.25	0.75	0.96
CIGENEomyV6.42651	CIGENEomyV6.46065	97.8	909	15	1	42	945	945	1	909	909	0	1595	12	13	12-13	71463391	71488106	12q_13q	40114596	40131371	12q_13q	12q_13q	12q_13q	155991	0.96	1
CIGENEomyV6.1116	CIGENEomyV6.5925	96.47	821	29	0	1	821	821	95	915	915	0	1616	1	2	1-2	24208612	24257763	1p_2q	53755137	53792748	1p_2q	1p_2q	1p_2q	155895.52	1	0.9
CIGENEomyV6.12931	CIGENEomyV6.18286	94.56	846	41	2	28	873	873	18	858	858	0	1648	4	5	4-5	25953356	26003252	4p_5q	71165670	71184895	4p_5q	4p_5q	4p_5q	155834.88	0.97	0.98
CIGENEomyV6.16364	CIGENEomyV6.86362	85.33	1159	126	9	1	1145	1145	1	1129	1129	0	1825	5	29	5-29	23368272	23447174	5p_29	16029804	16065306	5p_29	5p_29	5p_29	155727.25	1	1.02
CIGENEomyV6.32334	CIGENEomyV6.55987	95.52	826	37	0	138	963	963	1	826	826	0	1630	9	16	9-16	48479231	48564857	9q_16q	46005842	46043411	9q_16q	9q_16q	9q_16q	155697.6	0.86	1
CIGENEomyV6.42410	CIGENEomyV6.45712	97.72	788	18	0	1	788	788	1	788	788	0	1593	12	13	12-13	66398824	66418126	12q_13q	33509972	33528900	12q_13q	12q_13q	12q_13q	155667.96	1	1
CIGENEomyV6.20454	CIGENEomyV6.38380	96.49	826	29	0	23	848	848	1	826	826	0	1612	6	11	6-11	23803778	23852979	6p_11q	52791305	52835736	6p_11q	6p_11q	6p_11q	155541.88	0.97	1
CIGENEomyV6.67652	CIGENEomyV6.74302	87.23	1057	71	10	1	1047	1051	82	1084	1085	0	1783	20	23	20-23	25073443	25094327	20q_23	43814693	43869605	20q_23	20q_23	20q_23	155531.09	1	0.96
CIGENEomyV6.74942	CIGENEomyV6.82317	96.72	822	26	1	1	821	821	1	822	822	0	1608	24	27	24-27	10661711	10707070	24_27	13622775	13670548	24_27	24_27	24_27	155525.76	1	1
CIGENEomyV6.2206	CIGENEomyV6.55211	95.04	847	41	1	1	847	847	1	846	846	0	1635	1	16	1-16	54271648	54385316	1q_16q	28082580	28177705	1q_16q	1q_16q	1q_16q	155390.4	1	1
CIGENEomyV6.20605	CIGENEomyV6.38540	94.95	852	42	1	1	852	852	1	851	851	0	1635	6	11	6-11	27697216	27729017	6p_11q	56823015	56844188	6p_11q	6p_11q	6p_11q	155243.25	1	1
CIGENEomyV6.33854	CIGENEomyV6.41760	93.4	1031	61	4	5	1034	1034	1	1025	1025	0	1662	10	12	10-12	6252361	6270403	10p_12p	50878016	50900182	10p_12p	10p_12p	10p_12p	155230.8	0.99	1
CIGENEomyV6.42597	CIGENEomyV6.46129	90.16	1098	54	6	1	1055	1194	1	1087	1087	0	1721	12	13	12-13	70433974	70447187	12q_13q	41168289	41181386	12q_13q	12q_13q	12q_13q	155165.36	0.91	1
CIGENEomyV6.1261	CIGENEomyV6.6081	94.64	839	45	0	1	839	839	12	850	850	0	1639	1	2	1-2	28838762	28944797	1p_2q	58337339	58445836	1p_2q	1p_2q	1p_2q	155114.96	1	0.99
CIGENEomyV6.42673	CIGENEomyV6.46045	97.45	822	21	0	35	856	1059	42	863	893	0	1590	12	13	12-13	71765567	71776159	12q_13q	39812972	39822923	12q_13q	12q_13q	12q_13q	154945.5	0.78	0.92
CIGENEomyV6.20972	CIGENEomyV6.38930	89.51	944	90	3	12	954	1768	139	1074	1074	0	1731	6	11	6-11	36022935	36075173	6p_11q	65765052	65813866	6p_11q	6p_11q	6p_11q	154941.81	0.53	0.88
CIGENEomyV6.16544	CIGENEomyV6.86529	98.43	762	12	0	1	762	762	1	762	762	0	1573	5	29	5-29	28524332	28684893	5p_29	21661176	21780261	5p_29	5p_29	5p_29	154830.39	1	1
CIGENEomyV6.31575	CIGENEomyV6.56415	90.07	947	86	3	958	1899	1899	1	944	944	0	1718	9	16	9-16	29101801	29208406	9q_16q	55839899	55890563	9q_16q	9q_16q	9q_16q	154740.26	0.5	1
CIGENEomyV6.34703	CIGENEomyV6.40948	93.68	855	46	2	1	849	850	66	918	946	0	1651	10	12	10-12	32148754	32163413	10p_12p	25028114	25064500	10p_12p	10p_12p	10p_12p	154665.68	1	0.9
CIGENEomyV6.65108	CIGENEomyV6.79309	98.17	766	14	0	1	766	766	1	766	766	0	1575	19	25	19-25	29199740	29226712	19q_25q	69487402	69528174	19q_25q	19q_25q	19q_25q	154617.75	1	1
CIGENEomyV6.21515	CIGENEomyV6.80309	99.34	758	5	0	1	758	773	1	758	1140	0	1556	6	26	6-26	51693187	51720892	6q_26	6586914	6617916	6q_26	6q_26	6q_26	154573.04	0.98	0.66
CIGENEomyV6.53268	CIGENEomyV6.69220	98.93	749	8	0	1	749	749	13	761	761	0	1562	15	21	15-21	51911699	51956209	15q_21p	16118050	16151929	15q_21p	15q_21p	15q_21p	154528.66	1	0.98
CIGENEomyV6.4179	CIGENEomyV6.8740	98.82	765	9	0	1	765	765	1	765	765	0	1562	2	3	2-3	8854668	8900131	2p_3p	18593137	18639761	2p_3p	2p_3p	2p_3p	154356.84	1	1
CIGENEomyV6.32904	CIGENEomyV6.55464	93.63	864	43	2	2	857	1220	344	1203	1350	0	1648	9	16	9-16	60126886	60166813	9q_16q	35584667	35654378	9q_16q	9q_16q	9q_16q	154302.24	0.71	0.64
CIGENEomyV6.20663	CIGENEomyV6.38605	99.74	759	2	0	1	759	759	1	759	807	0	1547	6	11	6-11	28721263	28731074	6p_11q	57891327	57918120	6p_11q	6p_11q	6p_11q	154297.78	1	0.94
CIGENEomyV6.28633	CIGENEomyV6.84782	85.89	1056	126	7	1	1046	1046	1	1043	1043	0	1796	8	28	8-28	56007400	56155885	8q_28	23237860	23384086	8q_28	8q_28	8q_28	154258.44	1	1.01
CIGENEomyV6.74742	CIGENEomyV6.82113	96.7	819	27	0	1	819	819	1	819	819	0	1595	24	27	24-27	6503682	6541191	24_27	9210901	9234415	24_27	24_27	24_27	154236.5	1	1
CIGENEomyV6.16346	CIGENEomyV6.86348	93.74	862	47	4	1	855	878	1	862	863	0	1644	5	29	5-29	23049233	23077315	5p_29	15674026	15696684	5p_29	5p_29	5p_29	154108.56	0.98	0.99
CIGENEomyV6.13818	CIGENEomyV6.27045	89.66	977	69	5	1	956	956	1	966	966	0	1718	4	8	4-8	54133358	54167114	4q_8p	12272613	12322885	4q_8p	4q_8p	4q_8p	154035.88	1.02	1.01
CIGENEomyV6.54832	CIGENEomyV6.66787	96.68	783	24	1	1	781	786	1	783	784	0	1593	16	20	16-20	18000078	18012872	16p_20p	5255883	5291578	16p_20p	16p_20p	16p_20p	154011.24	0.99	1
CIGENEomyV6.16590	CIGENEomyV6.86583	81.36	1282	166	14	1	1219	1219	1	1272	1272	0	1890	5	29	5-29	29978014	30014236	5p_29	23260151	23283079	5p_29	5p_29	5p_29	153770.4	1.04	1
CIGENEomyV6.21933	CIGENEomyV6.80738	98.05	771	15	0	1	771	771	1	771	771	0	1568	6	26	6-26	62959986	62994959	6q_26	18051473	18080264	6q_26	6q_26	6q_26	153742.4	1	1
CIGENEomyV6.34843	CIGENEomyV6.40774	88.7	1000	103	6	1	997	997	1	993	993	0	1731	10	12	10-12	36253512	36268029	10p_12p	21071472	21080805	10p_12p	10p_12p	10p_12p	153539.7	1	1
CIGENEomyV6.34453	CIGENEomyV6.41282	93.7	857	54	0	1	857	890	1	857	946	0	1637	10	12	10-12	24353255	24371824	10p_12p	33001265	33021029	10p_12p	10p_12p	10p_12p	153386.9	0.96	0.91
CIGENEomyV6.53419	CIGENEomyV6.69061	92.88	1137	35	7	1	1097	1097	44	1174	1174	0	1651	15	21	15-21	53864360	53941838	15q_21p	14076140	14137851	15q_21p	15q_21p	15q_21p	153344.88	1.03	0.96
CIGENEomyV6.48953	CIGENEomyV6.62476	91.94	1440	102	6	553	1985	1992	174	1606	1731	0	1667	14	18	14-18	28437019	28465696	14p_18q	33318161	33411866	14p_18q	14p_18q	14p_18q	153263.98	0.72	0.83
CIGENEomyV6.13714	CIGENEomyV6.26933	90.42	887	83	2	1	885	885	1	887	887	0	1693	4	8	4-8	51486965	51555013	4q_8p	10101273	10162277	4q_8p	4q_8p	4q_8p	153081.06	1	1
CIGENEomyV6.75602	CIGENEomyV6.82945	90.87	986	71	5	1	974	975	87	1065	1067	0	1683	24	27	24-27	25844780	25912770	24_27	28571589	28594801	24_27	24_27	24_27	152934.21	1.01	0.92
CIGENEomyV6.4113	CIGENEomyV6.8690	89.82	1022	65	7	1	988	988	1	1017	1234	0	1701	2	3	2-3	8057811	8068763	2p_3p	17737266	17753336	2p_3p	2p_3p	2p_3p	152783.82	1.03	0.82
CIGENEomyV6.53112	CIGENEomyV6.69384	97.93	774	8	1	120	893	924	1	766	791	0	1560	15	21	15-21	48981366	49101604	15q_21p	19367969	19443365	15q_21p	15q_21p	15q_21p	152770.8	0.84	0.98
CIGENEomyV6.1617	CIGENEomyV6.6466	87.39	1031	91	7	1	1006	1006	1	1017	1017	0	1748	1	2	1-2	37722495	37802356	1p_2q	67154860	67251923	1p_2q	1p_2q	1p_2q	152757.72	1.02	1.01
CIGENEomyV6.34355	CIGENEomyV6.41367	91.44	935	69	3	1	927	927	7	938	938	0	1670	10	12	10-12	22111257	22120440	10p_12p	35290877	35303658	10p_12p	10p_12p	10p_12p	152704.8	1.01	0.99
CIGENEomyV6.13849	CIGENEomyV6.27072	89.26	931	89	5	1	927	931	1	924	937	0	1710	4	8	4-8	55101443	55153327	4q_8p	13232172	13271586	4q_8p	4q_8p	4q_8p	152634.6	0.99	0.99
CIGENEomyV6.17690	CIGENEomyV6.721	90.1	990	61	5	8	985	985	1	965	965	0	1693	5	1	1-5	56430818	56468385	1p_5q	15244241	15276477	1p_5q	1p_5q	1p_5q	152539.3	1	1.02
CIGENEomyV6.2998	CIGENEomyV6.73516	93.11	900	25	4	1	878	878	1	885	885	0	1638	1	23	1-23	76207784	76280678	1q_23	21765985	21834317	1q_23	1q_23	1q_23	152514.18	1.02	1.01
CIGENEomyV6.28314	CIGENEomyV6.85103	93.19	852	55	1	1	852	852	1	849	849	0	1635	8	28	8-28	48229441	48235936	8q_28	30990048	30997414	8q_28	8q_28	8q_28	152365.65	1	1
CIGENEomyV6.21486	CIGENEomyV6.80262	98.4	750	12	0	3	752	752	1	750	750	0	1548	6	26	6-26	50313631	50527009	6q_26	5500007	5531495	6q_26	6q_26	6q_26	152323.2	1	1
CIGENEomyV6.24628	CIGENEomyV6.60026	94.01	851	43	1	1	843	919	1	851	851	0	1618	7	17	7-17	39848534	40086101	7q_17q	57471080	57804113	7q_17q	7q_17q	7q_17q	152108.18	0.92	1
CIGENEomyV6.49800	CIGENEomyV6.77446	95.13	801	39	0	4	804	804	92	892	892	0	1598	14	25	14-25	48636324	48732892	14q_25p	21032726	21115952	14q_25p	14q_25p	14q_25p	152017.74	1	0.9
CIGENEomyV6.24982	CIGENEomyV6.59646	96.27	859	30	1	4	860	879	7	865	1075	0	1579	7	17	7-17	50517178	50530116	7q_17q	47396442	47411725	7q_17q	7q_17q	7q_17q	152010.33	0.98	0.8
CIGENEomyV6.64919	CIGENEomyV6.79524	93.93	840	35	3	172	1003	1003	1	832	832	0	1618	19	25	19-25	24346987	24414353	19q_25q	74417249	74461758	19q_25q	19q_25q	19q_25q	151978.74	0.83	1.01
CIGENEomyV6.21105	CIGENEomyV6.39106	96.98	796	24	0	1	796	796	1	796	796	0	1567	6	11	6-11	39550893	39564082	6p_11q	69773938	69792663	6p_11q	6p_11q	6p_11q	151967.66	1	1
CIGENEomyV6.21725	CIGENEomyV6.80537	95.94	813	30	1	10	819	819	1	813	813	0	1582	6	26	6-26	58169910	58181169	6q_26	13090229	13098654	6q_26	6q_26	6q_26	151777.08	0.99	1
CIGENEomyV6.74560	CIGENEomyV6.81859	96.34	792	5	1	1	792	792	1	768	768	0	1575	24	27	24-27	1501246	1529641	24_27	3330666	3366670	24_27	24_27	24_27	151735.5	1	1.03
CIGENEomyV6.74903	CIGENEomyV6.82284	93.83	875	54	0	16	890	890	1	875	875	0	1617	24	27	24-27	10047920	10078346	24_27	12971454	12997488	24_27	24_27	24_27	151723.11	0.98	1
CIGENEomyV6.4367	CIGENEomyV6.8768	95.1	857	40	1	1	857	857	1	855	855	0	1594	2	3	2-3	12513143	12717520	2p_3p	19240539	19424330	2p_3p	2p_3p	2p_3p	151589.4	1	1
CIGENEomyV6.28615	CIGENEomyV6.84798	96.43	784	28	0	1	784	784	1	784	784	0	1571	8	28	8-28	55390173	55431053	8q_28	23983218	24022912	8q_28	8q_28	8q_28	151491.53	1	1
CIGENEomyV6.49600	CIGENEomyV6.77241	93.62	862	49	1	18	873	873	4	865	865	0	1617	14	25	14-25	43990298	43996918	14q_25p	16212880	16220391	14q_25p	14q_25p	14q_25p	151383.54	0.99	1
CIGENEomyV6.23964	CIGENEomyV6.61990	98.38	742	12	0	1	742	742	1	742	742	0	1538	7	18	7-18	18721611	18857576	7p_18p	20660915	20794776	7p_18p	7p_18p	7p_18p	151308.44	1	1
CIGENEomyV6.23914	CIGENEomyV6.61951	96.12	824	26	1	112	929	929	1	824	1155	0	1573	7	18	7-18	17635617	17705700	7p_18p	19511250	19526827	7p_18p	7p_18p	7p_18p	151196.76	0.89	0.71
CIGENEomyV6.15861	CIGENEomyV6.85750	96.09	793	31	0	1	793	804	1	793	796	0	1573	5	29	5-29	12253700	12287314	5p_29	755497	818587	5p_29	5p_29	5p_29	151149.57	0.99	1
CIGENEomyV6.1163	CIGENEomyV6.5992	85.83	1030	135	4	1	1027	1028	1	1022	1025	0	1761	1	2	1-2	25710303	25732622	1p_2q	55341913	55357597	1p_2q	1p_2q	1p_2q	151146.63	1	1
CIGENEomyV6.35253	CIGENEomyV6.87120	97.16	810	17	1	1	804	804	44	853	853	0	1554	10	29	10-29	44215010	44234714	10p_29	33497942	33514353	10p_29	10p_29	10p_29	150986.64	1.01	0.95
CIGENEomyV6.13437	CIGENEomyV6.42121	98.55	758	5	1	1	758	758	1	752	752	0	1531	4	12	4-12	42605969	42651562	4p_12q	59732632	59762219	4p_12q	4p_12q	4p_12q	150880.05	1	1.01
CIGENEomyV6.23739	CIGENEomyV6.61772	95.5	845	31	3	10	847	847	31	875	875	0	1577	7	18	7-18	13087726	13099338	7p_18p	14968142	14980825	7p_18p	7p_18p	7p_18p	150603.5	0.99	0.96
CIGENEomyV6.1887	CIGENEomyV6.6689	83.03	1114	152	10	1	1109	1109	1	1082	1082	0	1812	1	2	1-2	44357688	44391059	1p_2q	73535910	73564626	1p_2q	1p_2q	1p_2q	150450.36	1	1.02
CIGENEomyV6.10594	CIGENEomyV6.71893	96.87	798	20	2	47	841	860	47	842	861	0	1553	3	22	3-22	65818988	65842790	3q_22q	29667654	29710396	3q_22q	3q_22q	3q_22q	150439.11	0.93	0.92
CIGENEomyV6.42276	CIGENEomyV6.45584	96.98	796	24	0	1	796	797	1	796	846	0	1551	12	13	12-13	63541620	63593790	12q_13q	30696020	30766520	12q_13q	12q_13q	12q_13q	150415.98	1	0.94
CIGENEomyV6.24953	CIGENEomyV6.59674	96.48	824	27	2	25	848	848	11	832	832	0	1558	7	17	7-17	50024921	50037072	7q_17q	47995714	48015507	7q_17q	7q_17q	7q_17q	150315.84	0.97	0.99
CIGENEomyV6.12740	CIGENEomyV6.18101	96.65	775	26	0	2	776	776	1	775	1152	0	1554	4	5	4-5	21730509	22065601	4p_5q	67263205	67305325	4p_5q	4p_5q	4p_5q	150194.1	1	0.67
CIGENEomyV6.32669	CIGENEomyV6.55669	83.32	1121	172	6	1	1116	1116	52	1162	1162	0	1802	9	16	9-16	55974277	55982627	9q_16q	39482329	39493251	9q_16q	9q_16q	9q_16q	150142.64	1	0.96
CIGENEomyV6.49097	CIGENEomyV6.62339	81.63	1328	199	20	1	1294	1294	10	1326	1326	0	1837	14	18	14-18	31060614	31084446	14p_18q	30859650	30878110	14p_18q	14p_18q	14p_18q	149954.31	1.01	0.99
CIGENEomyV6.32186	CIGENEomyV6.56132	92.85	895	47	1	1	895	1280	1	878	929	0	1614	9	16	9-16	45032423	45071456	9q_16q	49322464	49365290	9q_16q	9q_16q	9q_16q	149859.9	0.7	0.96
CIGENEomyV6.21673	CIGENEomyV6.80413	98.13	749	14	0	1	749	749	353	1101	1101	0	1527	6	26	6-26	56181138	56226500	6q_26	9849546	9912340	6q_26	6q_26	6q_26	149844.51	1	0.68
CIGENEomyV6.21741	CIGENEomyV6.80546	94.64	802	43	0	1	802	802	24	825	825	0	1582	6	26	6-26	58502038	58507941	6q_26	13375331	13381954	6q_26	6q_26	6q_26	149720.48	1	0.97
CIGENEomyV6.1812	CIGENEomyV6.6632	87.06	997	102	9	227	1211	1211	1	982	982	0	1719	1	2	1-2	42720775	42772391	1p_2q	72019223	72065825	1p_2q	1p_2q	1p_2q	149656.14	0.82	1.01
CIGENEomyV6.22008	CIGENEomyV6.80810	97.6	791	14	2	1	789	789	1	788	817	0	1533	6	26	6-26	64180798	64294425	6q_26	19396446	19503149	6q_26	6q_26	6q_26	149620.8	1	0.97
CIGENEomyV6.43186	CIGENEomyV6.46549	96.46	819	27	1	1	819	819	1	817	817	0	1551	12	13	12-13	81074597	81095231	12q_13q	47767180	47796120	12q_13q	12q_13q	12q_13q	149609.46	1	1
CIGENEomyV6.23420	CIGENEomyV6.61556	91.5	1000	69	6	1	988	988	1	996	996	0	1635	7	18	7-18	7519638	7527471	7p_18p	10783583	10797722	7p_18p	7p_18p	7p_18p	149602.5	1.01	1
CIGENEomyV6.74650	CIGENEomyV6.81970	90.76	963	62	9	1	952	952	1	947	947	0	1648	24	27	24-27	4283913	4293094	24_27	6044332	6055115	24_27	24_27	24_27	149572.48	1	1.01
CIGENEomyV6.24819	CIGENEomyV6.59822	96.18	785	29	1	6	789	789	1	785	785	0	1555	7	17	7-17	46490329	46515048	7q_17q	51055296	51075952	7q_17q	7q_17q	7q_17q	149559.9	0.99	1
CIGENEomyV6.20596	CIGENEomyV6.38534	90.68	955	42	7	48	957	957	1	953	953	0	1649	6	11	6-11	27431905	27485268	6p_11q	56549593	56594050	6p_11q	6p_11q	6p_11q	149531.32	0.99	0.99
CIGENEomyV6.24611	CIGENEomyV6.60041	84.45	1074	115	11	9	1064	1064	10	1049	1049	0	1770	7	17	7-17	39242263	39259276	7q_17q	58368095	58415008	7q_17q	7q_17q	7q_17q	149476.5	1	1.01
CIGENEomyV6.65332	CIGENEomyV6.79055	97.03	807	24	0	1	807	807	1	807	807	0	1540	19	25	19-25	35744970	35765782	19q_25q	62578518	62588574	19q_25q	19q_25q	19q_25q	149426.2	1	1
CIGENEomyV6.43040	CIGENEomyV6.46391	99.59	734	3	0	1	734	734	1	734	734	0	1500	12	13	12-13	78796079	78852815	12q_13q	45390063	45422829	12q_13q	12q_13q	12q_13q	149385	1	1
CIGENEomyV6.42869	CIGENEomyV6.46182	99.32	737	5	0	1	737	737	1	737	737	0	1504	12	13	12-13	74979502	74988098	12q_13q	41856293	41869269	12q_13q	12q_13q	12q_13q	149377.28	1	1
CIGENEomyV6.42902	CIGENEomyV6.46218	98.31	771	12	1	24	793	793	40	810	810	0	1517	12	13	12-13	75600857	75680713	12q_13q	42542954	42612481	12q_13q	12q_13q	12q_13q	149136.27	0.97	0.95
CIGENEomyV6.2958	CIGENEomyV6.73479	96.39	776	28	0	29	804	804	5	780	780	0	1547	1	23	1-23	75058287	75078246	1q_23	20552310	20591342	1q_23	1q_23	1q_23	149115.33	0.97	0.99
CIGENEomyV6.53168	CIGENEomyV6.69338	97.3	779	14	1	725	1496	1496	1	779	779	0	1532	15	21	15-21	50191495	50220515	15q_21p	18289837	18300227	15q_21p	15q_21p	15q_21p	149063.6	0.52	1
CIGENEomyV6.32564	CIGENEomyV6.55770	91.07	862	63	2	29	886	886	36	887	887	0	1636	9	16	9-16	52850808	52999137	9q_16q	42031160	42079068	9q_16q	9q_16q	9q_16q	148990.52	0.97	0.97
CIGENEomyV6.1610	CIGENEomyV6.6459	86.64	1078	141	1	337	1414	1445	23	1097	1134	0	1718	1	2	1-2	37495192	37546201	1p_2q	66969578	67012336	1p_2q	1p_2q	1p_2q	148847.52	0.75	0.95
CIGENEomyV6.42495	CIGENEomyV6.45804	92.95	879	50	4	1	874	874	1	872	872	0	1601	12	13	12-13	68266454	68289689	12q_13q	35419653	35465901	12q_13q	12q_13q	12q_13q	148812.95	1	1
CIGENEomyV6.35685	CIGENEomyV6.64636	98.11	742	14	0	1	742	771	1	742	789	0	1516	10	19	10-19	55223454	55235878	10q_19p	16214748	16232075	10q_19p	10q_19p	10q_19p	148734.76	0.96	0.94
CIGENEomyV6.24417	CIGENEomyV6.60268	86.31	964	127	3	417	1375	1375	5	968	968	0	1723	7	17	7-17	33806779	33834303	7q_17q	64379077	64409877	7q_17q	7q_17q	7q_17q	148712.13	0.7	0.99
CIGENEomyV6.42141	CIGENEomyV6.45453	95.86	943	35	2	1	943	1624	1	939	944	0	1550	12	13	12-13	60110417	60184240	12q_13q	28393544	28452060	12q_13q	12q_13q	12q_13q	148583	0.58	1
CIGENEomyV6.10011	CIGENEomyV6.71408	93.12	814	55	1	10	823	823	404	1216	1216	0	1594	3	22	3-22	50457485	50578855	3q_22p	16799983	16912158	3q_22p	3q_22p	3q_22p	148433.28	0.99	0.67
CIGENEomyV6.20707	CIGENEomyV6.38664	94.18	807	46	1	497	1302	1319	1	807	821	0	1576	6	11	6-11	29664244	29751491	6p_11q	58879336	58911323	6p_11q	6p_11q	6p_11q	148427.68	0.61	0.98
CIGENEomyV6.35006	CIGENEomyV6.86804	94.29	841	46	1	1	839	839	1	841	841	0	1573	10	29	10-29	40103115	40117726	10p_29	28592725	28616782	10p_29	10p_29	10p_29	148318.17	1	1
CIGENEomyV6.13837	CIGENEomyV6.27061	80.96	1150	171	15	1	1139	1139	1	1113	1113	0	1830	4	8	4-8	54676222	54695395	4q_8p	12829126	12873335	4q_8p	4q_8p	4q_8p	148156.8	1	1.02
CIGENEomyV6.36029	CIGENEomyV6.64271	98.02	758	14	1	1	758	758	1	757	757	0	1511	10	19	10-19	63421777	63484466	10q_19p	8703292	8782751	10q_19p	10q_19p	10q_19p	148108.22	1	1
CIGENEomyV6.10397	CIGENEomyV6.72058	86.14	1046	62	4	482	1483	1595	1	1007	1007	0	1719	3	22	3-22	60640055	60743268	3q_22q	35346720	35384194	3q_22q	3q_22q	3q_22q	148074.66	0.65	1.03
CIGENEomyV6.20909	CIGENEomyV6.38866	95.59	771	34	0	1	771	771	1	771	771	0	1549	6	11	6-11	34514375	34584640	6p_11q	64198409	64253836	6p_11q	6p_11q	6p_11q	148068.91	1	1
CIGENEomyV6.21944	CIGENEomyV6.80742	89.09	1155	30	7	1	1154	1154	1	1060	1060	0	1660	6	26	6-26	63112874	63132113	6q_26	18213134	18245998	6q_26	6q_26	6q_26	147889.4	0.99	1.08
CIGENEomyV6.65157	CIGENEomyV6.79250	86.93	1048	101	9	1	1029	1029	59	1089	1089	0	1700	19	25	19-25	30632788	30679176	19q_25q	67917306	67961749	19q_25q	19q_25q	19q_25q	147781	1.01	0.95
CIGENEomyV6.48728	CIGENEomyV6.62721	98.37	734	12	0	1	734	734	1	734	734	0	1502	14	18	14-18	23658427	23680381	14p_18q	38337423	38375991	14p_18q	14p_18q	14p_18q	147751.74	1	1
CIGENEomyV6.53647	CIGENEomyV6.68808	100	711	0	0	1	711	758	3	713	713	0	1477	15	21	15-21	58603527	58848284	15q_21p	8868095	9058768	15q_21p	15q_21p	15q_21p	147700	0.94	1
CIGENEomyV6.34400	CIGENEomyV6.41334	93.11	856	59	0	1	856	856	54	909	909	0	1585	10	12	10-12	22898959	22924320	10p_12p	34351898	34384457	10p_12p	10p_12p	10p_12p	147579.35	1	0.94
CIGENEomyV6.13355	CIGENEomyV6.42080	96.04	808	32	0	70	877	877	1	808	808	0	1534	4	12	4-12	40808122	40891640	4p_12q	58717860	58731704	4p_12q	4p_12q	4p_12q	147325.36	0.92	1
CIGENEomyV6.1715	CIGENEomyV6.6540	94.67	844	45	0	1	844	846	1	844	847	0	1556	1	2	1-2	40109417	40279196	1p_2q	69456653	69617984	1p_2q	1p_2q	1p_2q	147306.52	1	1
CIGENEomyV6.21503	CIGENEomyV6.80297	89.46	939	82	8	16	943	943	1	933	933	0	1646	6	26	6-26	51462884	51474691	6q_26	6381756	6395359	6q_26	6q_26	6q_26	147251.16	0.99	1
CIGENEomyV6.24006	CIGENEomyV6.62025	88.45	961	85	6	430	1368	1368	1	957	957	0	1664	7	18	7-18	19812918	19885609	7p_18p	21793671	21827756	7p_18p	7p_18p	7p_18p	147180.8	0.7	1
CIGENEomyV6.44665	CIGENEomyV6.57901	95.8	999	19	4	75	1066	1066	1	983	983	0	1536	13	17	13-17	11481995	11542952	13p_17p	7270235	7327416	13p_17p	13p_17p	13p_17p	147148.8	0.93	1.01
CIGENEomyV6.34691	CIGENEomyV6.40963	93.25	844	30	4	1	817	817	1	844	844	0	1578	10	12	10-12	31788026	31828086	10p_12p	25375951	25404169	10p_12p	10p_12p	10p_12p	147148.5	1.03	1
CIGENEomyV6.44733	CIGENEomyV6.57963	97.72	745	17	0	1	745	745	1	745	745	0	1505	13	17	13-17	12607733	12639018	13p_17p	8254703	8294191	13p_17p	13p_17p	13p_17p	147068.6	1	1
CIGENEomyV6.49610	CIGENEomyV6.77245	92.66	845	60	1	12	856	856	12	854	854	0	1587	14	25	14-25	44427508	44435945	14q_25p	16505448	16648737	14q_25p	14q_25p	14q_25p	147051.42	0.99	0.99
CIGENEomyV6.43175	CIGENEomyV6.46531	99.58	716	3	0	68	783	783	5	720	720	0	1476	12	13	12-13	80845247	80872160	12q_13q	47477203	47499822	12q_13q	12q_13q	12q_13q	146980.08	0.91	0.99
CIGENEomyV6.74615	CIGENEomyV6.81933	92.55	939	40	8	1	929	929	1	919	919	0	1588	24	27	24-27	3410328	3454060	24_27	5219159	5277876	24_27	24_27	24_27	146969.4	1	1.01
CIGENEomyV6.28844	CIGENEomyV6.84644	80.44	1135	186	6	9	1131	1131	1	1111	1111	0	1826	8	28	8-28	61044297	61069612	8q_28	19259850	19270934	8q_28	8q_28	8q_28	146883.44	1	1.02
CIGENEomyV6.48206	CIGENEomyV6.63232	96.23	795	30	0	1	795	795	1	795	795	0	1526	14	18	14-18	11344723	11363699	14p_18q	50342669	50360569	14p_18q	14p_18q	14p_18q	146846.98	1	1
CIGENEomyV6.75677	CIGENEomyV6.83023	84.35	1035	128	6	48	1081	1083	1	1002	1212	0	1738	24	27	24-27	27976858	27980337	24_27	30448155	30622017	24_27	24_27	24_27	146600.3	0.95	0.85
CIGENEomyV6.35465	CIGENEomyV6.64718	98.16	762	12	1	1	762	762	1	760	760	0	1493	10	19	10-19	49319377	49333127	10q_19p	17916872	17934319	10q_19p	10q_19p	10q_19p	146552.88	1	1
CIGENEomyV6.21724	CIGENEomyV6.80536	95.94	812	33	0	1	812	812	1	812	812	0	1527	6	26	6-26	58152629	58172143	6q_26	13070646	13093091	6q_26	6q_26	6q_26	146500.38	1	1
CIGENEomyV6.33917	CIGENEomyV6.41702	93.59	842	52	2	1	842	842	1	840	840	0	1565	10	12	10-12	7850459	7861067	10p_12p	49231199	49249083	10p_12p	10p_12p	10p_12p	146468.35	1	1
CIGENEomyV6.24570	CIGENEomyV6.60086	94.12	799	38	2	1	799	799	1	790	790	0	1556	7	17	7-17	38305781	38399537	7q_17q	59243132	59333532	7q_17q	7q_17q	7q_17q	146450.72	1	1.01
CIGENEomyV6.28531	CIGENEomyV6.84893	81.48	1296	172	19	731	2006	2023	10	1257	1270	0	1795	8	28	8-28	52558161	52588152	8q_28	27054018	27088246	8q_28	8q_28	8q_28	146256.6	0.63	1.01
CIGENEomyV6.34674	CIGENEomyV6.40994	91.76	898	49	6	77	966	966	2	882	882	0	1593	10	12	10-12	31406702	31462907	10p_12p	25864958	25901076	10p_12p	10p_12p	10p_12p	146173.68	0.92	1.01
CIGENEomyV6.24174	CIGENEomyV6.58696	93.63	801	28	4	1	780	780	700	1498	1498	0	1560	7	17	7-17	25005759	25525120	7q_17q	23102056	23523831	7q_17q	7q_17q	7q_17q	146062.8	1.02	0.53
CIGENEomyV6.2577	CIGENEomyV6.73086	84.65	1179	156	5	1	1177	1177	173	1328	1328	0	1723	1	23	1-23	64209949	64227476	1q_23	8599805	8613796	1q_23	1q_23	1q_23	145851.95	1	0.88
CIGENEomyV6.21639	CIGENEomyV6.80453	97.86	795	15	1	1	795	795	1	793	1388	0	1489	6	26	6-26	55059783	55107968	6q_26	10910893	11111984	6q_26	6q_26	6q_26	145713.54	1	0.57
CIGENEomyV6.28856	CIGENEomyV6.84631	92.73	921	61	4	1	918	918	1	918	918	0	1571	8	28	8-28	61223188	61241451	8q_28	19072135	19093558	8q_28	8q_28	8q_28	145678.83	1	1
CIGENEomyV6.42432	CIGENEomyV6.45738	98.87	710	8	0	12	721	721	15	724	724	0	1473	12	13	12-13	66769949	66775362	12q_13q	33877370	33881879	12q_13q	12q_13q	12q_13q	145635.51	0.98	0.98
CIGENEomyV6.42576	CIGENEomyV6.45875	98.28	813	10	1	1	813	813	1	809	809	0	1481	12	13	12-13	69908928	69926899	12q_13q	37083981	37110843	12q_13q	12q_13q	12q_13q	145552.68	1	1
CIGENEomyV6.28740	CIGENEomyV6.84749	95.12	779	38	0	1	779	779	1	779	779	0	1530	8	28	8-28	57999905	58101594	8q_28	22318900	22436587	8q_28	8q_28	8q_28	145533.6	1	1
CIGENEomyV6.17731	CIGENEomyV6.772	93.44	884	44	5	101	976	1205	1	878	878	0	1557	5	1	1-5	57242629	57312419	1p_5q	16126913	16191861	1p_5q	1p_5q	1p_5q	145486.08	0.73	1
CIGENEomyV6.35466	CIGENEomyV6.64715	90.85	951	59	7	62	1004	1004	23	953	953	0	1601	10	19	10-19	49372674	49429730	10q_19p	17830019	17875886	10q_19p	10q_19p	10q_19p	145450.85	0.94	0.99
CIGENEomyV6.34982	CIGENEomyV6.86778	94.75	800	40	2	3	802	802	7	804	804	0	1535	10	29	10-29	39784588	39818439	10p_29	28292338	28319176	10p_29	10p_29	10p_29	145441.25	1	0.99
CIGENEomyV6.65079	CIGENEomyV6.79346	90.19	877	82	3	1	875	875	1	875	875	0	1612	19	25	19-25	28465680	28614646	19q_25q	70217351	70255909	19q_25q	19q_25q	19q_25q	145386.28	1	1
CIGENEomyV6.42364	CIGENEomyV6.45660	94.96	813	37	2	1	810	810	1	812	812	0	1531	12	13	12-13	65349655	65362406	12q_13q	32508462	32523594	12q_13q	12q_13q	12q_13q	145383.76	1	1
CIGENEomyV6.4712	CIGENEomyV6.9278	98.06	723	14	0	67	789	789	1	723	723	0	1482	2	3	2-3	19612257	19664418	2p_3p	29548589	29606757	2p_3p	2p_3p	2p_3p	145324.92	0.92	1
CIGENEomyV6.37477	CIGENEomyV6.52530	94.15	786	46	0	1	786	786	1	786	786	0	1543	11	15	11-15	26968320	27031199	11p_15p	30830087	30877712	11p_15p	11p_15p	11p_15p	145273.45	1	1
CIGENEomyV6.5018	CIGENEomyV6.9608	94.99	799	39	1	1	798	798	1	799	799	0	1529	2	3	2-3	27230365	27275576	2p_3p	37195032	37244109	2p_3p	2p_3p	2p_3p	145239.71	1	1
CIGENEomyV6.1880	CIGENEomyV6.6679	85.09	1073	129	10	1	1055	1055	1	1060	1060	0	1706	1	2	1-2	44025788	44106546	1p_2q	73226795	73270273	1p_2q	1p_2q	1p_2q	145163.54	1.01	1
CIGENEomyV6.12976	CIGENEomyV6.18342	94.99	799	35	2	1	795	795	1	798	798	0	1528	4	5	4-5	27670552	27706089	4p_5q	72598443	72623184	4p_5q	4p_5q	4p_5q	145144.72	1	1
CIGENEomyV6.54743	CIGENEomyV6.67386	95.54	763	33	1	1	763	763	1	762	762	0	1519	16	20	16-20	16117394	16130814	16p_20p	18965779	19003467	16p_20p	16p_20p	16p_20p	145125.26	1	1
CIGENEomyV6.32223	CIGENEomyV6.56098	84.57	1063	125	15	1	1040	1040	1	1047	1047	0	1716	9	16	9-16	45653902	45713364	9q_16q	48759170	48792610	9q_16q	9q_16q	9q_16q	145122.12	1.01	1
CIGENEomyV6.65762	CIGENEomyV6.78660	87.47	1117	102	10	1	1093	1249	1	1103	1507	0	1659	19	25	19-25	44256903	44372604	19q_25q	53908824	54065840	19q_25q	19q_25q	19q_25q	145112.73	0.89	0.73
CIGENEomyV6.25013	CIGENEomyV6.59606	85.41	1042	130	8	416	1443	1443	68	1101	1101	0	1699	7	17	7-17	50951951	50997351	7q_17q	46809471	46821287	7q_17q	7q_17q	7q_17q	145111.59	0.72	0.94
CIGENEomyV6.33112	CIGENEomyV6.57077	93.8	871	49	3	1	870	870	1	867	867	0	1547	9	16	9-16	63453593	63459970	9q_16q	67286858	67303264	9q_16q	9q_16q	9q_16q	145108.6	1	1
CIGENEomyV6.28155	CIGENEomyV6.85327	86.93	987	115	6	327	1309	1309	1	977	977	0	1669	8	28	8-28	44795580	44888314	8q_28	34343458	34414473	8q_28	8q_28	8q_28	145086.17	0.75	1
CIGENEomyV6.43195	CIGENEomyV6.46556	95.88	801	26	2	1	798	798	1	797	797	0	1513	12	13	12-13	81173071	81188667	12q_13q	47866570	47887164	12q_13q	12q_13q	12q_13q	145066.44	1	1
CIGENEomyV6.42442	CIGENEomyV6.45752	99.29	709	4	1	1	709	712	1	708	800	0	1461	12	13	12-13	67105434	67128735	12q_13q	34211574	34228232	12q_13q	12q_13q	12q_13q	145062.69	0.99	0.88
CIGENEomyV6.42607	CIGENEomyV6.46124	98.48	726	11	0	1	726	726	1	726	726	0	1472	12	13	12-13	70592784	70682817	12q_13q	41011464	41035062	12q_13q	12q_13q	12q_13q	144962.56	1	1
CIGENEomyV6.22135	CIGENEomyV6.80933	94.79	787	41	0	1	787	787	1	787	787	0	1526	6	26	6-26	67023661	67043954	6q_26	22071388	22086277	6q_26	6q_26	6q_26	144649.54	1	1
CIGENEomyV6.3803	CIGENEomyV6.8400	99.58	712	3	0	1	712	712	1	712	712	0	1452	2	3	2-3	4136356	4159554	2p_3p	13460274	13483528	2p_3p	2p_3p	2p_3p	144590.16	1	1
CIGENEomyV6.53307	CIGENEomyV6.69174	96.82	755	24	0	1	755	755	1	755	755	0	1493	15	21	15-21	52365289	52375658	15q_21p	15705096	15716431	15q_21p	15q_21p	15q_21p	144552.26	1	1
CIGENEomyV6.48928	CIGENEomyV6.62511	92.15	841	61	2	1	836	879	1	841	906	0	1568	14	18	14-18	28027753	28032393	14p_18q	33747428	33761782	14p_18q	14p_18q	14p_18q	144491.2	0.95	0.93
CIGENEomyV6.21454	CIGENEomyV6.80231	92.95	809	57	0	29	837	837	1	809	809	0	1554	6	26	6-26	48942785	49348057	6q_26	4041370	4449859	6q_26	6q_26	6q_26	144444.3	0.97	1
CIGENEomyV6.52697	CIGENEomyV6.81812	99.02	712	7	0	6	717	717	1	712	712	0	1458	15	27	15-27	37818171	37846088	15q_27	2357612	2383062	15q_27	15q_27	15q_27	144371.16	0.99	1
CIGENEomyV6.65494	CIGENEomyV6.78917	93.71	842	46	3	1	836	836	1	841	841	0	1540	19	25	19-25	38872405	38906320	19q_25q	59523767	59581841	19q_25q	19q_25q	19q_25q	144313.4	1	1
CIGENEomyV6.34576	CIGENEomyV6.41115	99.29	706	5	0	1	706	706	1	706	706	0	1451	10	12	10-12	28995309	29016966	10p_12p	28235784	28256787	10p_12p	10p_12p	10p_12p	144069.79	1	1
CIGENEomyV6.23650	CIGENEomyV6.61701	93.06	865	46	4	1	853	853	54	916	916	0	1548	7	18	7-18	11310299	11325166	7p_18p	13176364	13192945	7p_18p	7p_18p	7p_18p	144056.88	1.01	0.94
CIGENEomyV6.44641	CIGENEomyV6.57884	92.53	1057	43	10	1	1043	1043	1	1035	1035	0	1556	13	17	13-17	11173161	11198374	13p_17p	6963524	6980625	13p_17p	13p_17p	13p_17p	143976.68	1	1.01
CIGENEomyV6.32679	CIGENEomyV6.55661	80.29	1172	206	11	135	1298	1298	1	1155	1155	0	1793	9	16	9-16	56222304	56283478	9q_16q	39213743	39233486	9q_16q	9q_16q	9q_16q	143959.97	0.89	1.01
CIGENEomyV6.21946	CIGENEomyV6.80744	97.91	764	15	1	1	763	763	1	764	764	0	1470	6	26	6-26	63159864	63264600	6q_26	18265798	18347052	6q_26	6q_26	6q_26	143927.7	1	1
CIGENEomyV6.10598	CIGENEomyV6.71891	81.11	1117	170	8	585	1664	1664	448	1560	1560	0	1774	3	22	3-22	65905341	65913380	3q_22q	29617545	29628352	3q_22q	3q_22q	3q_22q	143889.14	0.67	0.71
CIGENEomyV6.2593	CIGENEomyV6.73105	91.71	856	63	2	1	855	858	1	849	850	0	1568	1	23	1-23	64574631	64584370	1q_23	9001656	9020517	1q_23	1q_23	1q_23	143801.28	1	1
CIGENEomyV6.42202	CIGENEomyV6.45507	94.29	911	46	3	1	907	907	1	909	909	0	1523	12	13	12-13	61439920	61505998	12q_13q	29213622	29292041	12q_13q	12q_13q	12q_13q	143603.67	1	1
CIGENEomyV6.35038	CIGENEomyV6.86859	92.08	909	63	4	1	904	906	1	905	917	0	1556	10	29	10-29	40809237	40823841	10p_29	29423182	29441435	10p_29	10p_29	10p_29	143276.48	1	0.99
CIGENEomyV6.66048	CIGENEomyV6.78359	84.26	1093	146	10	1	1072	1072	1	1088	1088	0	1700	19	25	19-25	51641459	51704392	19q_25q	46646053	46722812	19q_25q	19q_25q	19q_25q	143242	1.01	1
CIGENEomyV6.75317	CIGENEomyV6.82680	98.73	706	9	0	1	706	802	1	706	1028	0	1450	24	27	24-27	18636745	18668263	24_27	21965068	21995407	24_27	24_27	24_27	143158.5	0.88	0.69
CIGENEomyV6.53296	CIGENEomyV6.69187	96.99	730	21	1	1	729	729	1	730	730	0	1476	15	21	15-21	52166073	52176555	15q_21p	15885526	15894541	15q_21p	15q_21p	15q_21p	143157.24	1	1
CIGENEomyV6.37415	CIGENEomyV6.52587	93.84	795	48	1	13	806	810	1	795	803	0	1525	11	15	11-15	23789612	23892239	11p_15p	34484698	34530278	11p_15p	11p_15p	11p_15p	143106	0.98	0.99
CIGENEomyV6.44964	CIGENEomyV6.58187	97.28	734	18	1	1	734	734	1	732	732	0	1471	13	17	13-17	17643897	17649858	13p_17p	13265762	13271525	13p_17p	13p_17p	13p_17p	143098.88	1	1
CIGENEomyV6.42700	CIGENEomyV6.46015	99.71	699	2	0	1	699	722	1	699	782	0	1435	12	13	12-13	72070223	72105534	12q_13q	39499845	39511624	12q_13q	12q_13q	12q_13q	143083.85	0.97	0.89
CIGENEomyV6.25357	CIGENEomyV6.59233	91.1	876	70	3	1	868	868	1	876	876	0	1570	7	17	7-17	59211832	59292138	7q_17q	38267985	38342637	7q_17q	7q_17q	7q_17q	143027	1.01	1
CIGENEomyV6.17644	CIGENEomyV6.668	86.95	1027	124	3	1	1017	1017	1	1027	1027	0	1643	5	1	1-5	55377786	55402317	1p_5q	13901678	13942347	1p_5q	1p_5q	1p_5q	142858.85	1.01	1
CIGENEomyV6.23883	CIGENEomyV6.61911	94.94	771	36	1	1	768	768	1	771	771	0	1504	7	18	7-18	16462437	16491843	7p_18p	18292508	18445768	7p_18p	7p_18p	7p_18p	142789.76	1	1
CIGENEomyV6.21924	CIGENEomyV6.80727	94.18	894	37	6	1	888	888	1	885	885	0	1516	6	26	6-26	62790242	62830600	6q_26	17897743	17925491	6q_26	6q_26	6q_26	142776.88	1	1
CIGENEomyV6.28297	CIGENEomyV6.85116	93.8	806	33	3	1	796	796	800	1598	1598	0	1522	8	28	8-28	47836500	47911823	8q_28	31167566	31217711	8q_28	8q_28	8q_28	142763.6	1.01	0.5
CIGENEomyV6.10161	CIGENEomyV6.72389	86.4	1015	101	8	1	996	996	1	997	997	0	1652	3	22	3-22	53738110	53761025	3q_22q	43423116	43438646	3q_22q	3q_22q	3q_22q	142732.8	1.01	1.01
CIGENEomyV6.21472	CIGENEomyV6.80245	89.24	1125	109	4	2	1126	1126	296	1408	1408	0	1599	6	26	6-26	49717283	49744870	6q_26	4773368	4863438	6q_26	6q_26	6q_26	142694.76	1	0.8
CIGENEomyV6.32671	CIGENEomyV6.55667	89.23	919	87	4	1	909	909	1	917	917	0	1599	9	16	9-16	56033987	56087260	9q_16q	39375814	39432160	9q_16q	9q_16q	9q_16q	142678.77	1.01	1
CIGENEomyV6.37707	CIGENEomyV6.52333	89.83	934	82	4	1	921	921	1	934	934	0	1587	11	15	11-15	34357241	34381993	11p_15p	23844546	23865421	11p_15p	11p_15p	11p_15p	142560.21	1.01	1
CIGENEomyV6.29073	CIGENEomyV6.84434	94.83	813	42	0	1	813	815	1	813	815	0	1503	8	28	8-28	67167665	67337836	8q_28	12854333	12876500	8q_28	8q_28	8q_28	142529.49	1	1
CIGENEomyV6.13892	CIGENEomyV6.27126	94.47	795	44	0	1	795	795	1	795	795	0	1508	4	8	4-8	56543159	56559287	4q_8p	14682245	14704648	4q_8p	4q_8p	4q_8p	142460.76	1	1
CIGENEomyV6.37734	CIGENEomyV6.52304	81.88	1247	182	19	1	1224	1224	432	1657	1657	0	1739	11	15	11-15	35295042	35311182	11p_15p	23072362	23199100	11p_15p	11p_15p	11p_15p	142389.32	1	0.74
CIGENEomyV6.2854	CIGENEomyV6.73374	95.48	775	30	2	69	841	841	26	797	797	0	1491	1	23	1-23	72050494	72153232	1q_23	16508786	16977775	1q_23	1q_23	1q_23	142360.68	0.92	0.97
CIGENEomyV6.65082	CIGENEomyV6.79342	91.54	875	62	5	1	871	887	218	1084	1676	0	1555	19	25	19-25	28554934	28637049	19q_25q	70118791	70184240	19q_25q	19q_25q	19q_25q	142344.7	0.98	0.52
CIGENEomyV6.71495	CIGENEomyV6.9931	89.18	924	91	4	1	917	917	1	922	952	0	1596	22	3	3-22	19327177	19356980	3q_22p	48149348	48174601	3q_22p	3q_22p	3q_22p	142331.28	1	0.97
CIGENEomyV6.3145	CIGENEomyV6.73608	83.18	1070	158	6	1	1055	1056	72	1134	1185	0	1711	1	23	1-23	79516962	79558634	1q_23	24822591	24922652	1q_23	1q_23	1q_23	142320.98	1.01	0.9
CIGENEomyV6.28597	CIGENEomyV6.84814	93.4	803	51	1	1	801	801	1	803	803	0	1523	8	28	8-28	54504140	54535124	8q_28	24817440	24898723	8q_28	8q_28	8q_28	142248.2	1	1
CIGENEomyV6.20914	CIGENEomyV6.38871	84.29	974	98	3	1	919	919	1	974	974	0	1687	6	11	6-11	34610873	34823858	6p_11q	64298569	64509591	6p_11q	6p_11q	6p_11q	142197.23	1.06	1
CIGENEomyV6.12957	CIGENEomyV6.18323	95.37	756	31	2	11	764	764	13	766	766	0	1491	4	5	4-5	27205257	27271885	4p_5q	72229123	72272785	4p_5q	4p_5q	4p_5q	142196.67	0.99	0.98
CIGENEomyV6.75365	CIGENEomyV6.82719	95.48	753	34	0	1	753	753	1	753	753	0	1489	24	27	24-27	19955254	19959203	24_27	23234633	23239082	24_27	24_27	24_27	142169.72	1	1
CIGENEomyV6.25688	CIGENEomyV6.58929	81.17	1115	185	11	1	1102	1102	1	1103	1103	0	1751	7	17	7-17	66030423	66054255	7q_17q	31061881	31106584	7q_17q	7q_17q	7q_17q	142128.67	1	1
CIGENEomyV6.21865	CIGENEomyV6.80657	95.74	751	25	2	1	751	1212	1	744	948	0	1484	6	26	6-26	61530330	61579003	6q_26	16285380	16331229	6q_26	6q_26	6q_26	142078.16	0.62	0.79
CIGENEomyV6.44721	CIGENEomyV6.57947	95.59	817	33	2	1	815	815	1	816	816	0	1486	13	17	13-17	12410561	12461200	13p_17p	8014403	8070218	13p_17p	13p_17p	13p_17p	142046.74	1	1
CIGENEomyV6.28910	CIGENEomyV6.84576	93.08	780	52	1	5	784	797	56	833	846	0	1526	8	28	8-28	62572164	62643239	8q_28	17566395	17682444	8q_28	8q_28	8q_28	142040.08	0.98	0.92
CIGENEomyV6.20343	CIGENEomyV6.38279	92.33	821	59	2	16	834	834	1	819	819	0	1538	6	11	6-11	20791342	20831375	6p_11q	49748528	49811805	6p_11q	6p_11q	6p_11q	142003.54	0.98	1
CIGENEomyV6.42149	CIGENEomyV6.45462	94.4	786	43	1	124	909	1186	19	803	806	0	1503	12	13	12-13	60344256	60431009	12q_13q	28634169	28671147	12q_13q	12q_13q	12q_13q	141883.2	0.66	0.97
CIGENEomyV6.1506	CIGENEomyV6.6323	80.18	1095	140	8	1	1029	1029	21	1104	1104	0	1769	1	2	1-2	33856572	33867111	1p_2q	63433319	63478206	1p_2q	1p_2q	1p_2q	141838.42	1.06	0.98
CIGENEomyV6.49939	CIGENEomyV6.77641	87.39	896	104	4	1	889	916	1	894	931	0	1623	14	25	14-25	51086610	51145342	14q_25p	23732043	23761056	14q_25p	14q_25p	14q_25p	141833.97	0.97	0.96
CIGENEomyV6.31599	CIGENEomyV6.56392	93.87	815	50	0	1	815	845	1	815	857	0	1510	9	16	9-16	29724628	29826403	9q_16q	55341259	55416648	9q_16q	9q_16q	9q_16q	141743.7	0.96	0.95
CIGENEomyV6.52948	CIGENEomyV6.69549	94.03	904	45	2	1	895	895	660	1563	1563	0	1507	15	21	15-21	44546906	44567429	15q_21p	23703651	23721743	15q_21p	15q_21p	15q_21p	141703.21	1.01	0.58
CIGENEomyV6.48896	CIGENEomyV6.62561	88.89	954	72	5	1	922	922	1	952	952	0	1593	14	18	14-18	27003652	27047369	14p_18q	34805668	34838575	14p_18q	14p_18q	14p_18q	141601.77	1.03	1
CIGENEomyV6.36864	CIGENEomyV6.51941	95.39	737	34	0	15	751	774	64	800	849	0	1483	11	15	11-15	10952331	11316611	11p_15p	13316287	13654949	11p_15p	11p_15p	11p_15p	141463.37	0.95	0.87
CIGENEomyV6.37468	CIGENEomyV6.52536	92.38	800	60	1	1	800	810	1	799	809	0	1531	11	15	11-15	25875222	26265966	11p_15p	31550523	31956337	11p_15p	11p_15p	11p_15p	141433.78	0.99	0.99
CIGENEomyV6.22083	CIGENEomyV6.80875	95.95	766	23	4	1	766	766	1	758	779	0	1474	6	26	6-26	65623385	65633586	6q_26	20468553	20483723	6q_26	6q_26	6q_26	141430.3	0.99	0.98
CIGENEomyV6.42796	CIGENEomyV6.45932	96.41	808	19	2	1	798	798	1	808	808	0	1466	12	13	12-13	73845546	73900935	12q_13q	37764296	37846219	12q_13q	12q_13q	12q_13q	141337.06	1.01	1
CIGENEomyV6.2572	CIGENEomyV6.73084	96	800	30	1	1	798	848	1	800	800	0	1472	1	23	1-23	64067556	64185948	1q_23	8468986	8565414	1q_23	1q_23	1q_23	141312	0.94	1
CIGENEomyV6.23742	CIGENEomyV6.61775	99	700	7	0	1	700	700	1	700	700	0	1426	7	18	7-18	13320038	13326164	7p_18p	15163949	15385253	7p_18p	7p_18p	7p_18p	141174	1	1
CIGENEomyV6.45080	CIGENEomyV6.58311	92.44	807	5	2	1	761	761	1	797	797	0	1527	13	17	13-17	19861000	19935040	13p_17p	15532874	15606963	13p_17p	13p_17p	13p_17p	141155.88	1.06	1.01
CIGENEomyV6.1322	CIGENEomyV6.6120	92.3	805	57	1	1	805	805	1	800	800	0	1529	1	2	1-2	29978473	30008115	1p_2q	59278674	59343918	1p_2q	1p_2q	1p_2q	141126.7	1	1
CIGENEomyV6.25835	CIGENEomyV6.58792	90.38	873	66	4	1	857	857	1	871	871	0	1559	7	17	7-17	69110313	69146292	7q_17q	27061726	27120417	7q_17q	7q_17q	7q_17q	140902.42	1.01	1
CIGENEomyV6.52994	CIGENEomyV6.69497	94.31	826	37	4	1	820	820	1	822	822	0	1494	15	21	15-21	45932821	45950493	15q_21p	22408323	22418158	15q_21p	15q_21p	15q_21p	140899.14	1	1
CIGENEomyV6.24976	CIGENEomyV6.59651	92.74	785	53	1	1	785	785	1	781	781	0	1519	7	17	7-17	50339702	50377967	7q_17q	47548612	47569196	7q_17q	7q_17q	7q_17q	140872.06	1	1
CIGENEomyV6.5753	CIGENEomyV6.902	92.74	813	59	0	1	813	813	1	813	813	0	1519	2	1	1-2	48467045	48569944	1p_2q	18734750	18815335	1p_2q	1p_2q	1p_2q	140872.06	1	1
CIGENEomyV6.32378	CIGENEomyV6.55951	92.8	806	56	2	162	965	965	2	807	807	0	1518	9	16	9-16	49718926	49747484	9q_16q	44845976	44868962	9q_16q	9q_16q	9q_16q	140870.4	0.83	1
CIGENEomyV6.42755	CIGENEomyV6.45969	96.13	723	28	0	31	753	764	60	782	783	0	1465	12	13	12-13	73156520	73160171	12q_13q	38527199	38532434	12q_13q	12q_13q	12q_13q	140830.45	0.95	0.92
CIGENEomyV6.52946	CIGENEomyV6.69551	92.33	834	51	4	229	1053	1091	1	830	1587	0	1525	15	21	15-21	44512865	44546483	15q_21p	23737333	23762910	15q_21p	15q_21p	15q_21p	140803.25	0.76	0.52
CIGENEomyV6.37500	CIGENEomyV6.52518	92.92	805	54	1	1	802	802	1	805	805	0	1515	11	15	11-15	28055760	28268032	11p_15p	29799069	29891079	11p_15p	11p_15p	11p_15p	140773.8	1	1
CIGENEomyV6.34542	CIGENEomyV6.41145	86.61	1135	89	12	1	1113	1113	4	1097	1097	0	1625	10	12	10-12	28101312	28254877	10p_12p	28964209	29094608	10p_12p	10p_12p	10p_12p	140741.25	1.01	1.02
CIGENEomyV6.34579	CIGENEomyV6.41111	93.14	802	55	0	1	802	802	134	935	1608	0	1511	10	12	10-12	29031619	29081021	10p_12p	28182954	28214655	10p_12p	10p_12p	10p_12p	140734.54	1	0.5
CIGENEomyV6.48268	CIGENEomyV6.63306	90.83	829	75	1	4	831	832	27	855	862	0	1549	14	18	14-18	12471034	12493455	14p_18q	51470841	51492522	14p_18q	14p_18q	14p_18q	140695.67	1	0.96
CIGENEomyV6.2339	CIGENEomyV6.72875	88.93	849	93	1	1	848	850	1	849	850	0	1582	1	23	1-23	58519354	58527410	1q_23	3012429	3061417	1q_23	1q_23	1q_23	140687.26	1	1
CIGENEomyV6.14948	CIGENEomyV6.26592	96.02	728	29	0	28	755	756	82	809	987	0	1465	4	8	4-8	81204025	81245460	4q_8p	3588828	3620424	4q_8p	4q_8p	4q_8p	140669.3	0.96	0.74
CIGENEomyV6.1921	CIGENEomyV6.6736	88.33	891	96	4	1	888	935	1	886	894	0	1592	1	2	1-2	45387411	45442870	1p_2q	74471231	74536327	1p_2q	1p_2q	1p_2q	140621.36	0.95	0.99
CIGENEomyV6.23876	CIGENEomyV6.61912	97.96	735	15	0	1	735	735	1	735	735	0	1435	7	18	7-18	16310189	16380432	7p_18p	18296247	18358824	7p_18p	7p_18p	7p_18p	140572.6	1	1
CIGENEomyV6.20285	CIGENEomyV6.38232	84.39	1025	117	9	266	1284	1284	2	989	989	0	1665	6	11	6-11	19921878	19952029	6p_11q	48958472	48970757	6p_11q	6p_11q	6p_11q	140509.35	0.79	1.03
CIGENEomyV6.32308	CIGENEomyV6.56013	89.21	890	86	5	1	885	885	1	885	885	0	1575	9	16	9-16	47975449	47990587	9q_16q	46548179	46576455	9q_16q	9q_16q	9q_16q	140505.75	1	1
CIGENEomyV6.52943	CIGENEomyV6.69555	93.6	828	51	1	1	826	828	1	828	829	0	1501	15	21	15-21	44489295	44503905	15q_21p	23781444	23797889	15q_21p	15q_21p	15q_21p	140493.6	1	1
CIGENEomyV6.44805	CIGENEomyV6.58018	88.19	889	104	1	1	889	952	15	902	902	0	1593	13	17	13-17	13662832	13667931	13p_17p	9399741	9415864	13p_17p	13p_17p	13p_17p	140486.67	0.93	0.98
CIGENEomyV6.24967	CIGENEomyV6.59661	97.62	715	17	0	94	808	808	8	722	722	0	1439	7	17	7-17	50186394	50246489	7q_17q	47700201	47796353	7q_17q	7q_17q	7q_17q	140475.18	0.88	0.99
CIGENEomyV6.16377	CIGENEomyV6.86371	85.16	1051	99	8	1	1028	1028	1	1017	1017	0	1649	5	29	5-29	23670763	23704641	5p_29	16298666	16346105	5p_29	5p_29	5p_29	140428.84	1.01	1.03
CIGENEomyV6.45079	CIGENEomyV6.58310	92.98	826	54	4	1	825	825	61	883	883	0	1509	13	17	13-17	19843891	19859679	13p_17p	15500687	15532232	13p_17p	13p_17p	13p_17p	140306.82	1	0.93
CIGENEomyV6.21850	CIGENEomyV6.80641	94.29	823	38	2	243	1057	1057	24	845	845	0	1488	6	26	6-26	60990128	61017350	6q_26	15817301	15837213	6q_26	6q_26	6q_26	140303.52	0.78	0.97
CIGENEomyV6.65537	CIGENEomyV6.78868	95.72	747	31	1	1	746	751	1	747	1024	0	1464	19	25	19-25	39701027	39731971	19q_25q	58704232	58733692	19q_25q	19q_25q	19q_25q	140134.08	0.99	0.73
CIGENEomyV6.16907	CIGENEomyV6.40510	89.19	879	57	3	1	879	879	1	841	841	0	1569	5	12	5-12	37189110	37205036	5p_12p	14456022	14516439	5p_12p	5p_12p	5p_12p	139939.11	1	1.04
CIGENEomyV6.25429	CIGENEomyV6.59182	85.38	1012	122	7	1	994	994	107	1110	1110	0	1639	7	17	7-17	60944952	61263867	7q_17q	36246067	36324004	7q_17q	7q_17q	7q_17q	139937.82	1.01	0.91
CIGENEomyV6.21585	CIGENEomyV6.80508	95.57	767	29	2	1	762	762	1	767	767	0	1464	6	26	6-26	53648648	53671636	6q_26	12458916	12486432	6q_26	6q_26	6q_26	139914.48	1	1
CIGENEomyV6.48772	CIGENEomyV6.62671	94.89	743	38	0	1	743	743	1	743	743	0	1474	14	18	14-18	24673540	24684879	14p_18q	37184164	37197630	14p_18q	14p_18q	14p_18q	139867.86	1	1
CIGENEomyV6.12699	CIGENEomyV6.18039	83.07	1093	139	5	7	1074	1074	1	1072	1072	0	1683	4	5	4-5	19875282	19914525	4p_5q	65196252	65254187	4p_5q	4p_5q	4p_5q	139806.81	1.01	1.01
CIGENEomyV6.15742	CIGENEomyV6.85942	93.86	814	41	3	1	808	841	1	811	1151	0	1489	5	29	5-29	9711679	9790883	5p_29	4824183	4953435	5p_29	5p_29	5p_29	139757.54	0.96	0.7
CIGENEomyV6.42332	CIGENEomyV6.45629	99.56	684	3	0	1	684	691	1	684	730	0	1403	12	13	12-13	64685956	64743149	12q_13q	31876432	31954575	12q_13q	12q_13q	12q_13q	139682.68	0.99	0.94
CIGENEomyV6.74800	CIGENEomyV6.82178	89.14	948	95	3	1	943	943	1	945	945	0	1567	24	27	24-27	7384578	7427128	24_27	10170586	10191931	24_27	24_27	24_27	139682.38	1	1
CIGENEomyV6.16604	CIGENEomyV6.86580	95.14	741	27	1	1	732	732	1	741	741	0	1468	5	29	5-29	30206273	30227876	5p_29	23192084	23462865	5p_29	5p_29	5p_29	139665.52	1.01	1
CIGENEomyV6.42852	CIGENEomyV6.46149	98.31	710	12	0	1	710	710	1	710	710	0	1420	12	13	12-13	74572715	74587293	12q_13q	41480666	41504644	12q_13q	12q_13q	12q_13q	139600.2	1	1
CIGENEomyV6.65438	CIGENEomyV6.78983	88.13	927	98	6	1	917	917	1	925	925	0	1583	19	25	19-25	37480329	37503720	19q_25q	60831385	60857189	19q_25q	19q_25q	19q_25q	139509.79	1	1
CIGENEomyV6.23372	CIGENEomyV6.61516	98.73	708	6	1	1	708	708	1	705	705	0	1412	7	18	7-18	6868206	6881076	7p_18p	10183845	10192083	7p_18p	7p_18p	7p_18p	139406.76	1	1
CIGENEomyV6.15938	CIGENEomyV6.85967	92.39	788	60	0	122	909	909	1	788	788	0	1508	5	29	5-29	13762991	13808962	5p_29	5267665	5323623	5p_29	5p_29	5p_29	139324.12	0.87	1
CIGENEomyV6.12997	CIGENEomyV6.18374	92.93	835	48	4	1	833	833	8	833	833	0	1499	4	5	4-5	28558252	28655355	4p_5q	73457587	73526861	4p_5q	4p_5q	4p_5q	139302.07	1	1
CIGENEomyV6.52901	CIGENEomyV6.69593	97.32	709	17	1	1	709	719	1	707	919	0	1431	15	21	15-21	43730982	43772483	15q_21p	24313523	24514173	15q_21p	15q_21p	15q_21p	139264.92	0.98	0.77
CIGENEomyV6.30806	CIGENEomyV6.70006	98.28	697	12	0	30	726	852	56	752	759	0	1417	9	21	9-21	9305044	9362919	9p_21q	33484368	33549958	9p_21q	9p_21q	9p_21q	139262.76	0.82	0.92
CIGENEomyV6.13377	CIGENEomyV6.42003	83.93	1481	188	16	1	1438	1438	1	1474	1474	0	1659	4	12	4-12	41233071	41552505	4p_12q	57342697	57362292	4p_12q	4p_12q	4p_12q	139239.87	1.02	0.99
CIGENEomyV6.23725	CIGENEomyV6.61762	98.54	686	10	0	1	686	686	1	686	686	0	1413	7	18	7-18	12421066	12474837	7p_18p	14331036	14380354	7p_18p	7p_18p	7p_18p	139237.02	1	1
CIGENEomyV6.23102	CIGENEomyV6.61243	94.77	822	24	2	1	804	909	563	1383	1383	0	1467	7	18	7-18	2456864	2472841	7p_18p	5756784	5777875	7p_18p	7p_18p	7p_18p	139027.59	0.9	0.59
CIGENEomyV6.45360	CIGENEomyV6.58496	83.45	1027	104	8	595	1572	1572	1	1010	1010	0	1664	13	17	13-17	26205046	26239378	13p_17p	18948133	18964827	13p_17p	13p_17p	13p_17p	138860.8	0.65	1.01
CIGENEomyV6.43688	CIGENEomyV6.57455	98.74	715	9	0	1	715	715	21	735	735	0	1406	13	17	13-17	52420	55160	13p_17p	1579425	1588639	13p_17p	13p_17p	13p_17p	138828.44	1	0.97
CIGENEomyV6.1838	CIGENEomyV6.6656	92.85	769	47	1	6	774	774	18	778	778	0	1495	1	2	1-2	43502793	43524625	1p_2q	72779610	72811288	1p_2q	1p_2q	1p_2q	138810.75	0.99	0.99
CIGENEomyV6.53534	CIGENEomyV6.68943	94.22	778	23	2	1	756	756	1	778	778	0	1473	15	21	15-21	56743454	56773164	15q_21p	11334884	11356741	15q_21p	15q_21p	15q_21p	138786.06	1.03	1
CIGENEomyV6.14746	CIGENEomyV6.27628	92.22	797	62	0	1	797	797	1	797	797	0	1504	4	8	4-8	76618361	76631802	4q_8p	27842000	27868801	4q_8p	4q_8p	4q_8p	138698.88	1	1
CIGENEomyV6.21967	CIGENEomyV6.80775	91.35	867	59	3	12	875	875	12	865	865	0	1518	6	26	6-26	63758867	63772977	6q_26	18987316	19002925	6q_26	6q_26	6q_26	138669.3	0.99	1
CIGENEomyV6.35926	CIGENEomyV6.64372	98.28	696	5	1	87	775	776	1	696	696	0	1410	10	19	10-19	60060264	60107719	10q_19p	11841471	11881269	10q_19p	10q_19p	10q_19p	138574.8	0.9	1
CIGENEomyV6.2560	CIGENEomyV6.73068	88.82	921	86	6	1	910	910	1	915	915	0	1560	1	23	1-23	63672403	63687069	1q_23	8074968	8106512	1q_23	1q_23	1q_23	138559.2	1.01	1
CIGENEomyV6.44955	CIGENEomyV6.58180	98.97	677	7	0	1	677	677	1	677	677	0	1400	13	17	13-17	17585694	17601736	13p_17p	13200284	13213906	13p_17p	13p_17p	13p_17p	138558	1	1
CIGENEomyV6.48924	CIGENEomyV6.62512	85.56	949	111	4	1	930	930	1	942	942	0	1618	14	18	14-18	27983222	28016753	14p_18q	33766850	33791550	14p_18q	14p_18q	14p_18q	138436.08	1.02	1
CIGENEomyV6.65290	CIGENEomyV6.79109	90.04	833	78	2	1	833	834	1	828	1266	0	1535	19	25	19-25	34863542	34869922	19q_25q	63469228	63490992	19q_25q	19q_25q	19q_25q	138211.4	1	0.66
CIGENEomyV6.29263	CIGENEomyV6.84298	83.14	1269	160	9	1	1230	1230	136	1389	1389	0	1662	8	28	8-28	70243602	70248684	8q_28	9788157	9805810	8q_28	8q_28	8q_28	138178.68	1.02	0.91
CIGENEomyV6.4554	CIGENEomyV6.9111	93.65	819	39	3	1	818	818	17	823	823	0	1475	2	3	2-3	16473052	16489790	2p_3p	26086895	26098393	2p_3p	2p_3p	2p_3p	138133.75	1	0.99
CIGENEomyV6.65075	CIGENEomyV6.79348	90.57	827	74	1	1	823	823	1	827	827	0	1525	19	25	19-25	28437790	28450914	19q_25q	70258419	70281598	19q_25q	19q_25q	19q_25q	138119.25	1	1
CIGENEomyV6.28815	CIGENEomyV6.84667	91.99	799	59	1	1	799	799	1	794	794	0	1501	8	28	8-28	60276452	60312792	8q_28	20068814	20098616	8q_28	8q_28	8q_28	138076.99	1	1.01
CIGENEomyV6.34784	CIGENEomyV6.40835	92.48	811	57	3	1	810	810	1	808	808	0	1492	10	12	10-12	34136706	34178358	10p_12p	23059737	23115305	10p_12p	10p_12p	10p_12p	137980.16	1	1
CIGENEomyV6.2005	CIGENEomyV6.6858	96.79	717	23	0	1	717	717	1	717	717	0	1425	1	2	1-2	49015754	49037720	1p_2q	78130904	78164869	1p_2q	1p_2q	1p_2q	137925.75	1	1
CIGENEomyV6.36659	CIGENEomyV6.52148	93.82	744	45	1	2	745	745	3	745	745	0	1470	11	15	11-15	5853376	5859295	11p_15p	18231907	18237532	11p_15p	11p_15p	11p_15p	137915.4	1	1
CIGENEomyV6.32446	CIGENEomyV6.55898	89.4	906	73	6	2	903	903	4	890	890	0	1542	9	16	9-16	50989809	51025503	9q_16q	43782035	43808144	9q_16q	9q_16q	9q_16q	137854.8	1	1.01
CIGENEomyV6.4919	CIGENEomyV6.9510	98.38	677	11	0	1	677	677	1	677	677	0	1400	2	3	2-3	24201917	24219507	2p_3p	34271346	34284203	2p_3p	2p_3p	2p_3p	137732	1	1
CIGENEomyV6.31789	CIGENEomyV6.56204	85.71	924	117	5	2	921	984	463	1375	1386	0	1605	9	16	9-16	33991853	34008986	9q_16q	50992393	51075968	9q_16q	9q_16q	9q_16q	137564.55	0.93	0.66
CIGENEomyV6.12703	CIGENEomyV6.18044	95.66	738	31	1	25	761	761	1	738	738	0	1438	4	5	4-5	19934466	19970379	4p_5q	65284231	65333624	4p_5q	4p_5q	4p_5q	137559.08	0.97	1
CIGENEomyV6.17391	CIGENEomyV6.386	93.05	791	49	3	1	791	791	1	785	785	0	1478	5	1	1-5	49884658	49928267	1p_5q	7804917	7818529	1p_5q	1p_5q	1p_5q	137527.9	1	1
CIGENEomyV6.45149	CIGENEomyV6.58409	96.53	721	22	2	15	735	990	16	733	741	0	1424	13	17	13-17	21581910	21602210	13p_17p	17334618	17347077	13p_17p	13p_17p	13p_17p	137458.72	0.73	0.97
CIGENEomyV6.20488	CIGENEomyV6.38414	98.25	685	12	0	1	685	685	1	685	685	0	1399	6	11	6-11	24559688	24580224	6p_11q	53560967	53585814	6p_11q	6p_11q	6p_11q	137451.75	1	1
CIGENEomyV6.35187	CIGENEomyV6.87031	88.34	926	90	10	1	912	912	1	922	922	0	1555	10	29	10-29	42854152	42864354	10p_29	31741068	31749873	10p_29	10p_29	10p_29	137368.7	1	0.99
CIGENEomyV6.20483	CIGENEomyV6.38409	92.3	831	64	0	6	836	844	8	838	873	0	1488	6	11	6-11	24474077	24484217	6p_11q	53438937	53457917	6p_11q	6p_11q	6p_11q	137342.4	0.98	0.95
CIGENEomyV6.33978	CIGENEomyV6.41651	95.44	724	33	0	1	724	724	1	724	724	0	1438	10	12	10-12	9480986	9532952	10p_12p	47391067	47433040	10p_12p	10p_12p	10p_12p	137242.72	1	1
CIGENEomyV6.42833	CIGENEomyV6.45890	90.66	921	44	5	67	951	972	56	970	970	0	1511	12	13	12-13	74315992	74340154	12q_13q	37347038	37370364	12q_13q	12q_13q	12q_13q	136987.26	0.94	0.94
CIGENEomyV6.1660	CIGENEomyV6.6503	80.29	1182	156	13	1	1174	1174	1	1113	1113	0	1706	1	2	1-2	38672857	38697306	1p_2q	67950468	67972922	1p_2q	1p_2q	1p_2q	136974.74	1	1.05
CIGENEomyV6.21746	CIGENEomyV6.80549	94	884	42	4	1	878	878	1	879	879	0	1457	6	26	6-26	58549919	58635199	6q_26	13403924	13500947	6q_26	6q_26	6q_26	136958	1	1
CIGENEomyV6.12951	CIGENEomyV6.18310	91.95	783	58	2	1	783	783	1	778	778	0	1488	4	5	4-5	26639944	26742978	4p_5q	71817119	71898676	4p_5q	4p_5q	4p_5q	136821.6	1	1
CIGENEomyV6.44970	CIGENEomyV6.58192	87.09	875	87	3	495	1344	1506	355	1228	1272	0	1571	13	17	13-17	17697049	17732814	13p_17p	13310301	13338876	13p_17p	13p_17p	13p_17p	136818.39	0.58	0.69
CIGENEomyV6.31727	CIGENEomyV6.56263	89.29	831	73	5	1	821	821	1	825	825	0	1532	9	16	9-16	32956734	32967474	9q_16q	52099407	52117309	9q_16q	9q_16q	9q_16q	136792.28	1.01	1
CIGENEomyV6.28401	CIGENEomyV6.85007	90.53	813	72	2	132	942	942	1	810	810	0	1510	8	28	8-28	50012823	50298109	8q_28	29235822	29301502	8q_28	8q_28	8q_28	136700.3	0.86	1
CIGENEomyV6.26029	CIGENEomyV6.60661	90.44	900	65	6	1	880	880	1	899	899	0	1511	7	17	7-17	74060075	74187938	7q_17q	71464253	71495869	7q_17q	7q_17q	7q_17q	136654.84	1.02	0.99
CIGENEomyV6.1668	CIGENEomyV6.6512	97.25	690	19	0	1	690	700	1	690	690	0	1405	1	2	1-2	38852199	38964334	1p_2q	68102503	68232361	1p_2q	1p_2q	1p_2q	136636.25	0.99	1
CIGENEomyV6.15813	CIGENEomyV6.85822	93.56	776	44	1	1	776	776	1	770	770	0	1460	5	29	5-29	11452621	11475650	5p_29	2576230	2637244	5p_29	5p_29	5p_29	136597.6	1	1.01
CIGENEomyV6.34407	CIGENEomyV6.41328	91.12	878	63	6	1	865	865	1	876	876	0	1498	10	12	10-12	23096001	23119786	10p_12p	34183229	34209718	10p_12p	10p_12p	10p_12p	136497.76	1.01	1
CIGENEomyV6.14567	CIGENEomyV6.27755	97.39	727	18	1	1	726	726	1	727	727	0	1401	4	8	4-8	73112116	73126105	4q_8p	31138294	31146977	4q_8p	4q_8p	4q_8p	136443.39	1	1
CIGENEomyV6.45151	CIGENEomyV6.58413	88.24	927	100	4	1	924	924	1	921	921	0	1546	13	17	13-17	21662554	21676488	13p_17p	17415510	17434777	13p_17p	13p_17p	13p_17p	136419.04	1	1
CIGENEomyV6.65920	CIGENEomyV6.78505	82.9	1117	158	9	18	1103	1103	599	1713	1835	0	1644	19	25	19-25	48330821	48364975	19q_25q	49989512	50035616	19q_25q	19q_25q	19q_25q	136287.6	1	0.6
CIGENEomyV6.32550	CIGENEomyV6.55788	94.83	735	38	0	1	735	735	1	735	735	0	1437	9	16	9-16	52523594	52590799	9q_16q	42363932	42425154	9q_16q	9q_16q	9q_16q	136270.71	1	1
CIGENEomyV6.34973	CIGENEomyV6.86770	86.31	935	108	7	1	930	930	1	920	920	0	1578	10	29	10-29	39631023	39638733	10p_29	28113413	28131731	10p_29	10p_29	10p_29	136197.18	1	1.01
CIGENEomyV6.71450	CIGENEomyV6.9967	92.44	767	55	1	1	767	767	1	764	764	0	1473	22	3	3-22	18341451	18404150	3q_22p	49007927	49027778	3q_22p	3q_22p	3q_22p	136164.12	1	1
CIGENEomyV6.23827	CIGENEomyV6.61854	92.98	812	51	3	12	821	992	1	808	808	0	1464	7	18	7-18	15189864	15203137	7p_18p	17090943	17099187	7p_18p	7p_18p	7p_18p	136122.72	0.82	1
CIGENEomyV6.31091	CIGENEomyV6.70259	94.27	768	42	1	1	766	766	1	768	768	0	1443	9	21	9-21	13793066	13816054	9p_21q	37660938	37684352	9p_21q	9p_21q	9p_21q	136031.61	1	1
CIGENEomyV6.29656	CIGENEomyV6.83942	90.02	822	41	3	1	784	784	28	846	846	0	1511	8	28	8-28	76568570	76599034	8q_28	1696258	1728714	8q_28	8q_28	8q_28	136020.22	1.04	0.97
CIGENEomyV6.23633	CIGENEomyV6.61684	93.32	779	43	3	1	773	784	2	777	778	0	1456	7	18	7-18	11038735	11041278	7p_18p	12874964	12877498	7p_18p	7p_18p	7p_18p	135873.92	0.99	1
CIGENEomyV6.13263	CIGENEomyV6.18869	93.48	751	46	2	1	750	750	1	749	749	0	1453	4	5	4-5	38073131	38123686	4p_5q	84112497	84218127	4p_5q	4p_5q	4p_5q	135826.44	1	1
CIGENEomyV6.24435	CIGENEomyV6.60245	90.08	796	79	0	1	796	796	1	796	796	0	1507	7	17	7-17	34372996	34386998	7q_17q	63700801	63711040	7q_17q	7q_17q	7q_17q	135750.56	1	1
CIGENEomyV6.53009	CIGENEomyV6.69485	97.31	707	19	0	1	707	707	1	707	707	0	1395	15	21	15-21	46212639	46228727	15q_21p	22039199	22139730	15q_21p	15q_21p	15q_21p	135747.45	1	1
CIGENEomyV6.24847	CIGENEomyV6.59790	87.57	877	99	3	1	875	888	9	877	879	0	1550	7	17	7-17	47128678	47133470	7q_17q	50483766	50496908	7q_17q	7q_17q	7q_17q	135733.5	0.98	0.99
CIGENEomyV6.32224	CIGENEomyV6.56093	86.11	972	121	4	16	986	986	1	959	959	0	1576	9	16	9-16	45720401	45787306	9q_16q	48682631	48734965	9q_16q	9q_16q	9q_16q	135709.36	0.98	1.01
CIGENEomyV6.34584	CIGENEomyV6.41097	91.2	807	43	4	133	917	1224	15	815	1185	0	1488	10	12	10-12	29273085	29411868	10p_12p	27823141	27870040	10p_12p	10p_12p	10p_12p	135705.6	0.66	0.68
CIGENEomyV6.35582	CIGENEomyV6.64771	96.3	703	26	0	142	844	844	2	704	704	0	1409	10	19	10-19	52842964	52853043	10q_19p	20238429	20290329	10q_19p	10q_19p	10q_19p	135686.7	0.83	1
CIGENEomyV6.22326	CIGENEomyV6.81128	100	655	0	0	6	660	660	2	656	656	0	1356	6	26	6-26	72464352	72515333	6q_26	27803402	27831584	6q_26	6q_26	6q_26	135600	0.99	1
CIGENEomyV6.10219	CIGENEomyV6.72284	89.74	858	79	2	390	1240	1246	1	856	858	0	1511	3	22	3-22	56010656	56059277	3q_22q	40252423	40260343	3q_22q	3q_22q	3q_22q	135597.14	0.69	1
CIGENEomyV6.37511	CIGENEomyV6.52511	90.32	816	68	2	1	814	814	1	807	807	0	1501	11	15	11-15	28726795	28756637	11p_15p	29070493	29203905	11p_15p	11p_15p	11p_15p	135570.32	1	1.01
CIGENEomyV6.74567	CIGENEomyV6.81861	94.21	760	43	1	53	812	814	35	793	1078	0	1438	24	27	24-27	1675179	1785359	24_27	3433942	3549489	24_27	24_27	24_27	135473.98	0.93	0.7
CIGENEomyV6.1157	CIGENEomyV6.5987	83.11	971	151	5	1	966	973	1	963	968	0	1630	1	2	1-2	25485779	25505537	1p_2q	55181122	55198085	1p_2q	1p_2q	1p_2q	135469.3	0.99	1
CIGENEomyV6.4239	CIGENEomyV6.8873	96.91	712	20	1	1	712	712	2	711	711	0	1397	2	3	2-3	9908096	9923891	2p_3p	22253947	22270991	2p_3p	2p_3p	2p_3p	135383.27	1	1
CIGENEomyV6.48975	CIGENEomyV6.62452	99.1	663	6	0	1	663	664	1	663	1029	0	1366	14	18	14-18	28869705	28902306	14p_18q	32886565	32921322	14p_18q	14p_18q	14p_18q	135370.6	1	0.64
CIGENEomyV6.34320	CIGENEomyV6.41415	91.01	801	54	2	43	825	1054	1	801	844	0	1487	10	12	10-12	21126759	21444698	10p_12p	36121231	36423963	10p_12p	10p_12p	10p_12p	135331.87	0.76	0.95
CIGENEomyV6.24434	CIGENEomyV6.60246	91.69	806	66	1	1	806	984	1	805	805	0	1475	7	17	7-17	34337455	34361088	7q_17q	63718777	63735617	7q_17q	7q_17q	7q_17q	135242.75	0.82	1
CIGENEomyV6.12595	CIGENEomyV6.17951	96.67	720	22	1	14	733	733	14	731	731	0	1399	4	5	4-5	16796014	16877456	4p_5q	62272151	62346284	4p_5q	4p_5q	4p_5q	135241.33	0.98	0.98
CIGENEomyV6.48852	CIGENEomyV6.62618	88.95	842	77	5	1	828	828	1	840	840	0	1520	14	18	14-18	26172993	26233684	14p_18q	35671939	35719566	14p_18q	14p_18q	14p_18q	135204	1.01	1
CIGENEomyV6.4602	CIGENEomyV6.9182	85.42	967	78	7	1	916	955	1	955	955	0	1582	2	3	2-3	17470083	17495353	2p_3p	27140886	27163920	2p_3p	2p_3p	2p_3p	135134.44	1.01	1.01
CIGENEomyV6.28823	CIGENEomyV6.84662	92.11	811	58	1	1	811	814	1	805	808	0	1467	8	28	8-28	60540625	60614176	8q_28	19732166	19817280	8q_28	8q_28	8q_28	135125.37	1	1
CIGENEomyV6.21955	CIGENEomyV6.80758	93.6	766	29	4	15	774	989	15	766	768	0	1443	6	26	6-26	63517091	63584371	6q_26	18686544	18697367	6q_26	6q_26	6q_26	135064.8	0.77	0.99
CIGENEomyV6.28822	CIGENEomyV6.84663	89.74	809	78	2	1	809	810	1	804	809	0	1505	8	28	8-28	60502897	60526386	8q_28	19824206	19855480	8q_28	8q_28	8q_28	135058.7	1	1
CIGENEomyV6.4666	CIGENEomyV6.9235	95.02	803	38	2	1	803	803	1	801	801	0	1421	2	3	2-3	18560431	18571035	2p_3p	28469845	28476542	2p_3p	2p_3p	2p_3p	135023.42	1	1
CIGENEomyV6.42409	CIGENEomyV6.45711	98.69	687	8	1	1	686	699	1	687	700	0	1368	12	13	12-13	66372712	66396463	12q_13q	33488712	33507740	12q_13q	12q_13q	12q_13q	135007.92	0.98	0.98
CIGENEomyV6.49892	CIGENEomyV6.77567	88.83	815	91	0	1	815	818	1	815	815	0	1519	14	25	14-25	49971442	50001402	14q_25p	22593620	22596292	14q_25p	14q_25p	14q_25p	134932.77	1	1
CIGENEomyV6.74769	CIGENEomyV6.82144	82.32	1103	174	6	343	1432	2035	72	1166	1166	0	1638	24	27	24-27	6932696	6992614	24_27	9702547	9758497	24_27	24_27	24_27	134840.16	0.54	0.94
CIGENEomyV6.16254	CIGENEomyV6.86293	96.71	729	24	0	1	729	729	1	729	729	0	1394	5	29	5-29	20913340	20964638	5p_29	13377048	13412733	5p_29	5p_29	5p_29	134813.74	1	1
CIGENEomyV6.25564	CIGENEomyV6.59046	91.33	830	68	2	1	830	854	1	826	827	0	1476	7	17	7-17	63135830	63176212	7q_17q	34054722	34176846	7q_17q	7q_17q	7q_17q	134803.08	0.97	1
CIGENEomyV6.29530	CIGENEomyV6.84012	83.54	1033	137	9	28	1044	1097	21	1036	1255	0	1612	8	28	8-28	74849234	74886496	8q_28	3559997	3627428	8q_28	8q_28	8q_28	134666.48	0.93	0.82
CIGENEomyV6.48876	CIGENEomyV6.62587	97.09	687	18	1	1	685	687	1	687	1034	0	1387	14	18	14-18	26683666	26707851	14p_18q	35132639	35161057	14p_18q	14p_18q	14p_18q	134663.83	1	0.66
CIGENEomyV6.20817	CIGENEomyV6.38783	96.39	692	25	0	1	692	696	19	710	1062	0	1397	6	11	6-11	32174273	32409224	6p_11q	61661061	61828962	6p_11q	6p_11q	6p_11q	134656.83	0.99	0.65
CIGENEomyV6.48916	CIGENEomyV6.62519	92.29	765	40	1	1	765	766	1	746	854	0	1459	14	18	14-18	27817696	27856848	14p_18q	33913609	33946425	14p_18q	14p_18q	14p_18q	134651.11	1	0.89
CIGENEomyV6.20705	CIGENEomyV6.38661	96.59	704	24	0	35	738	738	1	704	704	0	1394	6	11	6-11	29629163	29657629	6p_11q	58774197	58823324	6p_11q	6p_11q	6p_11q	134646.46	0.95	1
CIGENEomyV6.23711	CIGENEomyV6.61752	93.69	856	50	1	31	886	888	1	852	1606	0	1436	7	18	7-18	12225215	12233771	7p_18p	14132519	14138984	7p_18p	7p_18p	7p_18p	134538.84	0.96	0.53
CIGENEomyV6.20048	CIGENEomyV6.37988	88.34	892	81	5	322	1193	1193	1	889	889	0	1522	6	11	6-11	15178614	15217495	6p_11q	44100651	44138869	6p_11q	6p_11q	6p_11q	134453.48	0.74	1
CIGENEomyV6.17299	CIGENEomyV6.247	80.02	1166	196	13	309	1465	1467	1	1138	1140	0	1680	5	1	1-5	47494580	47573038	1p_5q	4564915	4581438	1p_5q	1p_5q	1p_5q	134433.6	0.79	1.01
CIGENEomyV6.35226	CIGENEomyV6.87089	94.63	726	38	1	38	762	764	1	726	728	0	1419	10	29	10-29	43857014	43867726	10p_29	33026029	33042754	10p_29	10p_29	10p_29	134279.97	0.95	1
CIGENEomyV6.10513	CIGENEomyV6.71953	93.64	755	36	2	1	743	747	1	755	758	0	1434	3	22	3-22	64174925	64205564	3q_22q	31609971	31668241	3q_22q	3q_22q	3q_22q	134279.76	1.01	0.99
CIGENEomyV6.2815	CIGENEomyV6.73340	93.74	735	40	2	1	730	730	21	754	754	0	1432	1	23	1-23	70957890	70963998	1q_23	15489400	15553030	1q_23	1q_23	1q_23	134235.68	1	0.97
CIGENEomyV6.34556	CIGENEomyV6.41136	89.58	825	58	4	2	799	818	24	847	853	0	1498	10	12	10-12	28460259	28474651	10p_12p	28772901	28786186	10p_12p	10p_12p	10p_12p	134190.84	1	0.96
CIGENEomyV6.45191	CIGENEomyV6.58472	93.26	786	15	2	1	748	748	1	786	786	0	1438	13	17	13-17	22469184	22565635	13p_17p	18271619	18361697	13p_17p	13p_17p	13p_17p	134107.88	1.05	1
CIGENEomyV6.24596	CIGENEomyV6.60055	89.89	821	60	3	1	819	819	25	824	824	0	1491	7	17	7-17	38922766	38940814	7q_17q	58675960	58705384	7q_17q	7q_17q	7q_17q	134025.99	1	0.99
CIGENEomyV6.20467	CIGENEomyV6.38389	96.6	706	24	0	1	706	724	1	706	724	0	1387	6	11	6-11	24091018	24114084	6p_11q	53112714	53128816	6p_11q	6p_11q	6p_11q	133984.2	0.98	0.98
CIGENEomyV6.49879	CIGENEomyV6.77551	88.86	826	92	0	1	826	837	1	826	853	0	1507	14	25	14-25	49857433	49863712	14q_25p	22493967	22497703	14q_25p	14q_25p	14q_25p	133912.02	0.99	0.97
CIGENEomyV6.4905	CIGENEomyV6.9499	95.04	746	37	0	1	746	746	1	746	746	0	1409	2	3	2-3	24048711	24065739	2p_3p	34105271	34119676	2p_3p	2p_3p	2p_3p	133911.36	1	1
CIGENEomyV6.35967	CIGENEomyV6.64306	98.93	653	7	0	1	653	653	1	653	653	0	1353	10	19	10-19	61495169	61527221	10q_19p	10293878	10330777	10q_19p	10q_19p	10q_19p	133852.29	1	1
CIGENEomyV6.36818	CIGENEomyV6.51986	98.08	678	11	1	1	678	678	9	684	684	0	1364	11	15	11-15	9719172	9734072	11p_15p	14958613	14969587	11p_15p	11p_15p	11p_15p	133781.12	1	0.99
CIGENEomyV6.48585	CIGENEomyV6.62865	92.28	881	48	5	792	1655	1655	7	884	884	0	1449	14	18	14-18	19902945	19966335	14p_18q	42502869	42517816	14p_18q	14p_18q	14p_18q	133713.72	0.53	0.99
CIGENEomyV6.48929	CIGENEomyV6.62510	93.92	756	39	1	315	1063	1109	1	756	853	0	1423	14	18	14-18	28033054	28049392	14p_18q	33734736	33744473	14p_18q	14p_18q	14p_18q	133648.16	0.68	0.89
CIGENEomyV6.50159	CIGENEomyV6.77863	82.85	1009	148	9	1	986	986	19	1025	1025	0	1613	14	25	14-25	56038789	56069502	14q_25p	28828466	28859923	14q_25p	14q_25p	14q_25p	133637.05	1.01	0.98
CIGENEomyV6.42461	CIGENEomyV6.45766	95.76	707	30	0	1	707	707	180	886	886	0	1395	12	13	12-13	67549239	67564953	12q_13q	34675827	34693763	12q_13q	12q_13q	12q_13q	133585.2	1	0.8
CIGENEomyV6.12773	CIGENEomyV6.18128	93.98	748	37	1	8	755	755	1	740	740	0	1420	4	5	4-5	22495545	22524798	4p_5q	67744337	67760775	4p_5q	4p_5q	4p_5q	133451.6	0.99	1.01
CIGENEomyV6.43038	CIGENEomyV6.46389	99.1	663	6	0	1	663	663	1	663	663	0	1346	12	13	12-13	78762960	78775771	12q_13q	45358069	45370746	12q_13q	12q_13q	12q_13q	133388.6	1	1
CIGENEomyV6.45029	CIGENEomyV6.58261	96.77	711	23	0	1	711	711	1	711	711	0	1378	13	17	13-17	18701599	18714658	13p_17p	14371716	14385425	13p_17p	13p_17p	13p_17p	133349.06	1	1
CIGENEomyV6.16402	CIGENEomyV6.86395	90.19	826	64	3	1	809	816	1	826	838	0	1478	5	29	5-29	24777987	24809101	5p_29	17650363	17668203	5p_29	5p_29	5p_29	133300.82	1.01	0.98
CIGENEomyV6.14034	CIGENEomyV6.27293	96.52	690	24	0	1	690	690	1	690	690	0	1381	4	8	4-8	60655426	60663216	4q_8p	18920700	18923924	4q_8p	4q_8p	4q_8p	133294.12	1	1
CIGENEomyV6.65370	CIGENEomyV6.79026	90.43	794	75	1	1	794	1252	1	793	794	0	1474	19	25	19-25	36332920	36359853	19q_25q	61915554	61950593	19q_25q	19q_25q	19q_25q	133293.82	0.63	1
CIGENEomyV6.23608	CIGENEomyV6.61671	90.76	833	40	6	1	797	987	1	832	861	0	1468	7	18	7-18	10777215	10797008	7p_18p	12582975	12618144	7p_18p	7p_18p	7p_18p	133235.68	0.84	0.96
CIGENEomyV6.44223	CIGENEomyV6.57683	96.68	783	17	3	6	786	1029	1	776	776	0	1378	13	17	13-17	5349702	5359728	13p_17p	4558552	4563553	13p_17p	13p_17p	13p_17p	133225.04	0.76	1.01
CIGENEomyV6.4569	CIGENEomyV6.9138	95.48	775	26	2	18	792	819	339	1104	1255	0	1395	2	3	2-3	16862461	16875501	2p_3p	26488275	26521094	2p_3p	2p_3p	2p_3p	133194.6	0.94	0.62
CIGENEomyV6.10248	CIGENEomyV6.72241	82.1	1106	129	19	11	1092	1114	65	1125	1132	0	1622	3	22	3-22	56854874	56935411	3q_22q	39327456	39389361	3q_22q	3q_22q	3q_22q	133166.2	0.98	0.96
CIGENEomyV6.67868	CIGENEomyV6.73686	85.43	899	114	5	1	883	883	37	934	934	0	1558	20	23	20-23	30981367	30994276	20q_23	27515750	27529108	20q_23	20q_23	20q_23	133099.94	1.01	0.96
CIGENEomyV6.12708	CIGENEomyV6.18053	95.89	730	20	1	41	770	811	5	724	1032	0	1388	4	5	4-5	20048418	20074628	4p_5q	65421970	65456979	4p_5q	4p_5q	4p_5q	133095.32	0.9	0.71
CIGENEomyV6.35779	CIGENEomyV6.64550	95.47	772	31	2	1	768	1301	1	772	1225	0	1394	10	19	10-19	57366620	57388244	10q_19p	14493968	14514757	10q_19p	10q_19p	10q_19p	133085.18	0.59	0.63
CIGENEomyV6.42950	CIGENEomyV6.46918	94.85	719	30	3	215	928	1128	16	732	735	0	1403	12	13	12-13	77050239	77160194	12q_13q	54978690	54996670	12q_13q	12q_13q	12q_13q	133074.55	0.63	0.97
CIGENEomyV6.12675	CIGENEomyV6.18018	89.05	886	81	6	1	872	872	1	884	884	0	1494	4	5	4-5	18858067	18918598	4p_5q	64229809	64295752	4p_5q	4p_5q	4p_5q	133040.7	1.01	1
CIGENEomyV6.10114	CIGENEomyV6.71300	93.94	742	43	1	119	860	860	1	740	740	0	1416	3	22	3-22	52763436	52811924	3q_22p	14483900	14531703	3q_22p	3q_22p	3q_22p	133019.04	0.86	1
CIGENEomyV6.75184	CIGENEomyV6.82544	97.75	668	15	0	5	672	672	165	832	832	0	1360	24	27	24-27	15787439	15814297	24_27	18909243	18946878	24_27	24_27	24_27	132940	0.99	0.8
CIGENEomyV6.34930	CIGENEomyV6.86722	86.45	1063	95	15	1	1038	1038	1	1039	1039	0	1537	10	29	10-29	38641485	38660833	10p_29	26996118	27032060	10p_29	10p_29	10p_29	132873.65	1.01	1.01
CIGENEomyV6.16888	CIGENEomyV6.40548	84.83	1015	123	5	1	986	987	1	1013	1017	0	1565	5	12	5-12	36530672	36572587	5p_12p	15245051	15316444	5p_12p	5p_12p	5p_12p	132758.95	1.02	0.99
CIGENEomyV6.12744	CIGENEomyV6.18100	95.83	695	29	0	1	695	709	1	695	708	0	1385	4	5	4-5	21985132	22015857	4p_5q	67255720	67275820	4p_5q	4p_5q	4p_5q	132724.55	0.98	0.98
CIGENEomyV6.75364	CIGENEomyV6.82718	98.24	738	9	1	1	738	738	1	734	734	0	1351	24	27	24-27	19941490	19963097	24_27	23221190	23233705	24_27	24_27	24_27	132722.24	1	1
CIGENEomyV6.54905	CIGENEomyV6.66610	95.48	753	33	1	1	753	753	1	752	752	0	1390	16	20	16-20	19779463	19795240	16p_20p	535457	556722	16p_20p	16p_20p	16p_20p	132717.2	1	1
CIGENEomyV6.75491	CIGENEomyV6.82844	86.11	914	108	8	1	901	1041	1	908	910	0	1541	24	27	24-27	23431671	23457805	24_27	26441510	26454185	24_27	24_27	24_27	132695.51	0.87	1
CIGENEomyV6.13692	CIGENEomyV6.26892	87.16	989	99	9	1	968	968	1	982	982	0	1522	4	8	4-8	50891735	50932012	4q_8p	9473992	9489077	4q_8p	4q_8p	4q_8p	132657.52	1.01	1
CIGENEomyV6.5783	CIGENEomyV6.921	97.39	689	18	0	1	689	689	1	689	689	0	1362	2	1	1-2	49105767	49145273	1p_2q	19356278	19400364	1p_2q	1p_2q	1p_2q	132645.18	1	1
CIGENEomyV6.17683	CIGENEomyV6.717	93.28	923	51	6	1	923	933	1	912	922	0	1422	5	1	1-5	56390248	56406968	1p_5q	15205731	15220009	1p_5q	1p_5q	1p_5q	132644.16	0.98	0.99
CIGENEomyV6.34687	CIGENEomyV6.40970	92.66	763	43	5	1	753	753	1	760	760	0	1431	10	12	10-12	31678442	31688312	10p_12p	25508928	25515660	10p_12p	10p_12p	10p_12p	132596.46	1.01	1
CIGENEomyV6.14704	CIGENEomyV6.27662	91.29	804	66	2	1	800	800	1	804	804	0	1452	4	8	4-8	75558700	75712247	4q_8p	28767138	28914296	4q_8p	4q_8p	4q_8p	132553.08	1	1
CIGENEomyV6.35133	CIGENEomyV6.86986	95.14	700	34	0	66	765	765	36	735	735	0	1393	10	29	10-29	42164544	42214182	10p_29	31077067	31103389	10p_29	10p_29	10p_29	132530.02	0.92	0.95
CIGENEomyV6.20337	CIGENEomyV6.38276	95.7	791	31	2	1	788	788	1	791	791	0	1384	6	11	6-11	20727184	20750698	6p_11q	49709447	49728292	6p_11q	6p_11q	6p_11q	132448.8	1	1
CIGENEomyV6.20954	CIGENEomyV6.38901	95.01	701	35	0	520	1220	1220	1	701	847	0	1394	6	11	6-11	35609936	35624343	6p_11q	65275662	65331775	6p_11q	6p_11q	6p_11q	132443.94	0.57	0.83
CIGENEomyV6.13825	CIGENEomyV6.27049	92.38	800	44	4	1	798	798	1	785	785	0	1433	4	8	4-8	54314101	54344333	4q_8p	12457351	12473722	4q_8p	4q_8p	4q_8p	132380.54	1	1.01
CIGENEomyV6.54554	CIGENEomyV6.67100	96.33	736	27	0	1	736	736	172	907	907	0	1373	16	20	16-20	11777228	11839449	16p_20p	12524341	12939310	16p_20p	16p_20p	16p_20p	132261.09	1	0.81
CIGENEomyV6.35800	CIGENEomyV6.64514	98.78	655	8	0	1	655	655	547	1201	1201	0	1337	10	19	10-19	57722509	57732672	10q_19p	14083731	14097808	10q_19p	10q_19p	10q_19p	132068.86	1	0.55
CIGENEomyV6.23834	CIGENEomyV6.61867	89.82	943	67	9	13	929	929	719	1658	1658	0	1470	7	18	7-18	15297315	15309775	7p_18p	17194290	17209649	7p_18p	7p_18p	7p_18p	132035.4	1.01	0.56
CIGENEomyV6.35279	CIGENEomyV6.87163	84.58	908	127	6	124	1021	1021	272	1176	1176	0	1560	10	29	10-29	44747004	44758769	10p_29	34202211	34225858	10p_29	10p_29	10p_29	131944.8	0.88	0.77
CIGENEomyV6.75014	CIGENEomyV6.82389	86.15	888	73	5	1	840	850	1	886	952	0	1530	24	27	24-27	12105694	12114329	24_27	15113554	15126771	24_27	24_27	24_27	131809.5	1.04	0.93
CIGENEomyV6.75128	CIGENEomyV6.82495	88.69	902	86	6	6	897	897	24	919	919	0	1486	24	27	24-27	14473181	14486813	24_27	17518140	17526614	24_27	24_27	24_27	131793.34	1	0.97
CIGENEomyV6.65168	CIGENEomyV6.79241	92.21	796	57	2	1	796	796	1	791	791	0	1429	19	25	19-25	31389278	31445850	19q_25q	67261631	67305340	19q_25q	19q_25q	19q_25q	131768.09	1	1
CIGENEomyV6.1950	CIGENEomyV6.6775	94.09	744	37	2	1	744	744	1	737	737	0	1400	1	2	1-2	46892250	46943590	1p_2q	75891961	75917940	1p_2q	1p_2q	1p_2q	131726	1	1.01
CIGENEomyV6.28882	CIGENEomyV6.84604	81.54	1262	162	15	65	1300	1303	109	1325	1327	0	1615	8	28	8-28	61886524	61931188	8q_28	18367759	18423600	8q_28	8q_28	8q_28	131687.1	0.96	0.94
CIGENEomyV6.53108	CIGENEomyV6.69389	98.62	654	9	0	1	654	654	271	924	924	0	1335	15	21	15-21	48948133	48963043	15q_21p	19528899	19550447	15q_21p	15q_21p	15q_21p	131657.7	1	0.71
CIGENEomyV6.14497	CIGENEomyV6.27816	93.97	779	42	2	1	775	775	1	778	778	0	1400	4	8	4-8	71248566	71369688	4q_8p	32622514	32738798	4q_8p	4q_8p	4q_8p	131558	1	1
CIGENEomyV6.3929	CIGENEomyV6.8515	95.79	713	30	0	1	713	726	1	713	728	0	1373	2	3	2-3	5736674	5749173	2p_3p	15018465	15042279	2p_3p	2p_3p	2p_3p	131519.67	0.98	0.98
CIGENEomyV6.48541	CIGENEomyV6.62906	93.13	728	49	1	1	727	727	1	728	728	0	1412	14	18	14-18	18771105	18790952	14p_18q	43560116	43597757	14p_18q	14p_18q	14p_18q	131499.56	1	1
CIGENEomyV6.13050	CIGENEomyV6.18436	90.92	804	64	3	1	803	926	69	864	867	0	1446	4	5	4-5	30584146	30665867	4p_5q	75179722	75233373	4p_5q	4p_5q	4p_5q	131470.32	0.87	0.92
CIGENEomyV6.28748	CIGENEomyV6.84737	96.09	716	25	2	1	716	716	1	713	713	0	1368	8	28	8-28	58486606	58519994	8q_28	21953335	21963610	8q_28	8q_28	8q_28	131451.12	1	1
CIGENEomyV6.14326	CIGENEomyV6.27919	97.58	702	15	1	113	814	814	35	734	734	0	1347	4	8	4-8	67336263	67364025	4q_8p	35955679	35982930	4q_8p	4q_8p	4q_8p	131440.26	0.86	0.96
CIGENEomyV6.42904	CIGENEomyV6.46219	96.04	707	3	1	1	707	708	1	682	706	0	1368	12	13	12-13	75714754	75736520	12q_13q	42642296	42661606	12q_13q	12q_13q	12q_13q	131382.72	1	1
CIGENEomyV6.23890	CIGENEomyV6.61920	90.81	838	56	7	1	829	831	1	826	885	0	1446	7	18	7-18	16617167	16626622	7p_18p	18526411	18548385	7p_18p	7p_18p	7p_18p	131311.26	1	0.94
CIGENEomyV6.74674	CIGENEomyV6.82047	96.48	710	25	0	1	710	710	1	710	710	0	1361	24	27	24-27	4758628	4870134	24_27	7602856	7712911	24_27	24_27	24_27	131309.28	1	1
CIGENEomyV6.43034	CIGENEomyV6.46382	99.38	643	4	0	1	643	643	1	643	643	0	1321	12	13	12-13	78674037	78685206	12q_13q	45266996	45276731	12q_13q	12q_13q	12q_13q	131280.98	1	1
CIGENEomyV6.30781	CIGENEomyV6.69946	91.79	913	54	3	1	904	904	1	901	901	0	1430	9	21	9-21	9016339	9030014	9p_21q	32518041	32535723	9p_21q	9p_21q	9p_21q	131259.7	1.01	1.01
CIGENEomyV6.4661	CIGENEomyV6.9231	95.39	738	33	1	1	738	741	1	737	738	0	1376	2	3	2-3	18499662	18529627	2p_3p	28430761	28456755	2p_3p	2p_3p	2p_3p	131256.64	0.99	1
CIGENEomyV6.34091	CIGENEomyV6.41608	92.76	746	49	2	4	748	748	3	744	744	0	1415	10	12	10-12	12279455	12410738	10p_12p	45351999	45498067	10p_12p	10p_12p	10p_12p	131255.4	0.99	1
CIGENEomyV6.44668	CIGENEomyV6.57907	99.28	690	4	1	579	1268	1332	25	713	854	0	1322	13	17	13-17	11573862	11669557	13p_17p	7424742	7447127	13p_17p	13p_17p	13p_17p	131248.16	0.52	0.81
CIGENEomyV6.24609	CIGENEomyV6.60044	91.68	769	62	1	27	793	800	1	769	774	0	1430	7	17	7-17	39153022	39169924	7q_17q	58476291	58749762	7q_17q	7q_17q	7q_17q	131102.4	0.96	0.99
CIGENEomyV6.23821	CIGENEomyV6.61847	99.53	639	3	0	1	639	639	1	639	639	0	1317	7	18	7-18	15102899	15120402	7p_18p	16991199	17007358	7p_18p	7p_18p	7p_18p	131081.01	1	1
CIGENEomyV6.37703	CIGENEomyV6.52335	92.82	766	53	1	1	764	764	1	766	766	0	1412	11	15	11-15	34318794	34348686	11p_15p	23872160	23882693	11p_15p	11p_15p	11p_15p	131061.84	1	1
CIGENEomyV6.54740	CIGENEomyV6.67380	88.83	824	89	2	1	824	920	1	821	845	0	1475	16	20	16-20	16104883	16113717	16p_20p	18930043	18944371	16p_20p	16p_20p	16p_20p	131024.25	0.89	0.97
CIGENEomyV6.17681	CIGENEomyV6.711	89.79	823	65	5	215	1025	1025	2	817	817	0	1459	5	1	1-5	56308806	56344470	1p_5q	15104485	15130537	1p_5q	1p_5q	1p_5q	131003.61	0.8	1
CIGENEomyV6.34983	CIGENEomyV6.86779	88.77	917	94	4	1	910	910	1	915	915	0	1475	10	29	10-29	39825719	39849958	10p_29	28322135	28348985	10p_29	10p_29	10p_29	130935.75	1	1
CIGENEomyV6.4855	CIGENEomyV6.9452	89.99	939	77	9	48	977	977	58	988	988	0	1455	2	3	2-3	22588138	22615552	2p_3p	32625806	32658038	2p_3p	2p_3p	2p_3p	130935.45	0.95	0.94
CIGENEomyV6.25620	CIGENEomyV6.58985	93.05	748	49	2	32	779	780	4	748	1062	0	1406	7	17	7-17	64266446	64290339	7q_17q	32651593	32698753	7q_17q	7q_17q	7q_17q	130828.3	0.96	0.7
CIGENEomyV6.12603	CIGENEomyV6.17957	95.55	697	26	3	195	888	972	16	710	711	0	1368	4	5	4-5	16966027	16982544	4p_5q	62426534	62506242	4p_5q	4p_5q	4p_5q	130712.4	0.71	0.98
CIGENEomyV6.4546	CIGENEomyV6.9101	96.81	689	22	0	1	689	689	1	689	689	0	1348	2	3	2-3	16205744	16232002	2p_3p	25793389	25827467	2p_3p	2p_3p	2p_3p	130499.88	1	1
CIGENEomyV6.19791	CIGENEomyV6.37807	81.11	1059	146	10	1	1044	1044	1	1020	1020	0	1608	6	11	6-11	7720453	7745100	6p_11q	37938877	37966626	6p_11q	6p_11q	6p_11q	130424.88	1	1.03
CIGENEomyV6.17097	CIGENEomyV6.40301	89.44	786	83	0	1	786	1020	170	955	956	0	1457	5	12	5-12	41286757	41391488	5p_12p	10624665	10682499	5p_12p	5p_12p	5p_12p	130314.08	0.77	0.82
CIGENEomyV6.28241	CIGENEomyV6.85173	99.52	629	3	0	441	1069	1069	1	629	629	0	1309	8	28	8-28	47057721	47079963	8q_28	31922191	31936919	8q_28	8q_28	8q_28	130271.68	0.59	1
CIGENEomyV6.29292	CIGENEomyV6.84266	82.7	994	137	13	263	1230	1231	2	986	988	0	1575	8	28	8-28	70768335	70796784	8q_28	9272568	9320502	8q_28	8q_28	8q_28	130252.5	0.8	0.99
CIGENEomyV6.51076	CIGENEomyV6.76542	87.19	1015	80	10	158	1146	1146	2	992	992	0	1492	14	25	14-25	77929968	77959408	14q_25p	3166212	3179934	14q_25p	14q_25p	14q_25p	130087.48	0.88	1.01
CIGENEomyV6.53138	CIGENEomyV6.69369	98.31	652	11	0	1	652	1019	1	652	658	0	1323	15	21	15-21	49485481	49497104	15q_21p	19026001	19038522	15q_21p	15q_21p	15q_21p	130064.13	0.64	0.99
CIGENEomyV6.21688	CIGENEomyV6.80387	92.83	767	54	1	1	767	767	84	849	849	0	1401	6	26	6-26	57398679	57413943	6q_26	8632316	8647330	6q_26	6q_26	6q_26	130054.83	1	0.9
CIGENEomyV6.65481	CIGENEomyV6.78928	98.15	647	12	0	1	647	666	1	647	709	0	1325	19	25	19-25	38676478	38688395	19q_25q	59729319	59748809	19q_25q	19q_25q	19q_25q	130048.75	0.97	0.91
CIGENEomyV6.14744	CIGENEomyV6.27630	95.1	715	35	0	1	715	918	1	715	722	0	1367	4	8	4-8	76548602	76598516	4q_8p	27871994	27906648	4q_8p	4q_8p	4q_8p	130001.7	0.78	0.99
CIGENEomyV6.48558	CIGENEomyV6.62891	86.88	953	80	6	1	916	916	1	945	945	0	1496	14	18	14-18	19280638	19397306	14p_18q	42978796	43066184	14p_18q	14p_18q	14p_18q	129972.48	1.03	1
CIGENEomyV6.74962	CIGENEomyV6.82346	91.39	778	63	1	1	778	780	221	994	1028	0	1422	24	27	24-27	11245820	11257860	24_27	14275767	14303210	24_27	24_27	24_27	129956.58	1	0.76
CIGENEomyV6.34427	CIGENEomyV6.41308	82.72	1007	99	6	114	1072	1072	1	980	980	0	1571	10	12	10-12	23541748	23602169	10p_12p	33798702	33827750	10p_12p	10p_12p	10p_12p	129953.12	0.93	1.02
CIGENEomyV6.49636	CIGENEomyV6.77273	95.94	689	28	0	1	689	689	1	689	689	0	1354	14	25	14-25	45300935	45630028	14q_25p	17369213	17793085	14q_25p	14q_25p	14q_25p	129902.76	1	1
CIGENEomyV6.49652	CIGENEomyV6.77299	97.23	685	18	1	1	685	685	1	684	684	0	1336	14	25	14-25	45830275	45844011	14q_25p	18023082	18033580	14q_25p	14q_25p	14q_25p	129899.28	1	1
CIGENEomyV6.49898	CIGENEomyV6.77589	87.94	804	96	1	1	803	816	1	804	817	0	1477	14	25	14-25	50295106	50337403	14q_25p	22918241	22941606	14q_25p	14q_25p	14q_25p	129887.38	0.98	0.98
CIGENEomyV6.35470	CIGENEomyV6.64709	94.27	698	40	0	1	698	698	1	698	698	0	1377	10	19	10-19	49457092	49524542	10q_19p	17718180	17783738	10q_19p	10q_19p	10q_19p	129809.79	1	1
CIGENEomyV6.24565	CIGENEomyV6.60101	93.2	721	49	0	1	721	721	1	721	721	0	1392	7	17	7-17	37953599	37968017	7q_17q	59699744	59712806	7q_17q	7q_17q	7q_17q	129734.4	1	1
CIGENEomyV6.44874	CIGENEomyV6.58113	95.23	733	24	4	10	742	742	1	722	722	0	1362	13	17	13-17	16313402	16328602	13p_17p	12173628	12198878	13p_17p	13p_17p	13p_17p	129703.26	0.98	1.01
CIGENEomyV6.16511	CIGENEomyV6.86497	83.96	960	110	6	154	1110	1110	2	920	920	0	1544	5	29	5-29	26974477	27000360	5p_29	19912499	19945415	5p_29	5p_29	5p_29	129634.24	0.86	1.04
CIGENEomyV6.31500	CIGENEomyV6.56560	89.7	893	84	5	1	885	885	1	893	893	0	1444	9	16	9-16	27225425	27280899	9q_16q	58130636	58148211	9q_16q	9q_16q	9q_16q	129526.8	1	0.99
CIGENEomyV6.25290	CIGENEomyV6.59303	92.12	749	59	0	1	749	749	1	749	749	0	1406	7	17	7-17	57158623	57223819	7q_17q	40378886	40426338	7q_17q	7q_17q	7q_17q	129520.72	1	1
CIGENEomyV6.50381	CIGENEomyV6.78078	92.96	753	20	1	117	869	869	13	732	732	0	1393	14	25	14-25	62307235	62359515	14q_25p	36205815	36254534	14q_25p	14q_25p	14q_25p	129493.28	0.87	1.03
CIGENEomyV6.28595	CIGENEomyV6.84816	91.94	744	32	1	1	716	716	1	744	744	0	1408	8	28	8-28	54410500	54487347	8q_28	24934503	25011032	8q_28	8q_28	8q_28	129451.52	1.04	1
CIGENEomyV6.21980	CIGENEomyV6.80785	97.28	771	19	1	1	769	769	1	771	771	0	1330	6	26	6-26	63879003	63892666	6q_26	19104283	19115625	6q_26	6q_26	6q_26	129382.4	1	1
CIGENEomyV6.13756	CIGENEomyV6.26962	97.11	727	19	1	2	726	726	1	727	727	0	1331	4	8	4-8	52351144	52360006	4q_8p	10666611	10677154	4q_8p	4q_8p	4q_8p	129253.41	1	1
CIGENEomyV6.24015	CIGENEomyV6.62035	89.14	801	48	1	8	769	769	40	840	840	0	1449	7	18	7-18	20484332	20881325	7p_18p	22462593	22900270	7p_18p	7p_18p	7p_18p	129163.86	1.04	0.95
CIGENEomyV6.5817	CIGENEomyV6.949	92.19	807	48	4	1	803	803	1	796	796	0	1401	2	1	1-2	50058507	50108154	1p_2q	20587156	20649072	1p_2q	1p_2q	1p_2q	129158.19	1	1.01
CIGENEomyV6.42872	CIGENEomyV6.46185	92.54	737	40	2	1	737	737	1	722	722	0	1395	12	13	12-13	75019730	75040821	12q_13q	41902851	41917056	12q_13q	12q_13q	12q_13q	129093.3	1	1.02
CIGENEomyV6.25034	CIGENEomyV6.59590	94.78	690	34	1	1	690	690	1	688	688	0	1361	7	17	7-17	51202987	51224816	7q_17q	46571889	46601490	7q_17q	7q_17q	7q_17q	128995.58	1	1
CIGENEomyV6.20697	CIGENEomyV6.38647	94.36	745	31	2	1	744	744	1	735	735	0	1367	6	11	6-11	29375153	29413157	6p_11q	58511248	58584046	6p_11q	6p_11q	6p_11q	128990.12	1	1.01
CIGENEomyV6.34472	CIGENEomyV6.41255	96.67	661	22	0	1	661	661	1	661	661	0	1334	10	12	10-12	24750730	24782927	10p_12p	32526680	32543247	10p_12p	10p_12p	10p_12p	128957.78	1	1
CIGENEomyV6.1222	CIGENEomyV6.6042	95.36	711	22	1	1	700	700	1	711	711	0	1352	1	2	1-2	27083920	27141864	1p_2q	56551176	56617284	1p_2q	1p_2q	1p_2q	128926.72	1.01	1
CIGENEomyV6.16865	CIGENEomyV6.40569	94.8	711	30	3	1	706	706	1	709	709	0	1359	5	12	5-12	36131820	36155612	5p_12p	15802531	15827369	5p_12p	5p_12p	5p_12p	128833.2	1	1
CIGENEomyV6.35532	CIGENEomyV6.64729	92.28	790	55	2	1	790	1566	1	784	784	0	1395	10	19	10-19	50581790	50679815	10q_19p	18208574	18320595	10q_19p	10q_19p	10q_19p	128730.6	0.5	1.01
CIGENEomyV6.53635	CIGENEomyV6.68831	97.67	687	16	0	384	1070	1070	5	691	691	0	1318	15	21	15-21	58112006	58226733	15q_21p	9491964	9496597	15q_21p	15q_21p	15q_21p	128729.06	0.64	0.99
CIGENEomyV6.12793	CIGENEomyV6.18146	82.09	1217	167	17	1121	2320	2389	27	1209	1781	0	1568	4	5	4-5	22973283	23127568	4p_5q	68358301	68375314	4p_5q	4p_5q	4p_5q	128717.12	0.5	0.67
CIGENEomyV6.20755	CIGENEomyV6.38711	95.38	714	31	2	1	712	712	10	723	723	0	1349	6	11	6-11	30451443	30539254	6p_11q	59580702	59666035	6p_11q	6p_11q	6p_11q	128667.62	1	0.98
CIGENEomyV6.14724	CIGENEomyV6.27645	89.59	826	82	2	1	822	1139	1	826	888	0	1436	4	8	4-8	76210028	76234366	4q_8p	28195372	28218711	4q_8p	4q_8p	4q_8p	128651.24	0.72	0.93
CIGENEomyV6.17551	CIGENEomyV6.579	95.05	687	33	1	1	687	687	1	686	686	0	1353	5	1	1-5	53527401	53551135	1p_5q	11933876	11946304	1p_5q	1p_5q	1p_5q	128602.65	1	1
CIGENEomyV6.20816	CIGENEomyV6.38776	90.49	810	54	6	1	802	802	1	795	795	0	1420	6	11	6-11	32097114	32170403	6p_11q	61485302	61499402	6p_11q	6p_11q	6p_11q	128495.8	1	1.01
CIGENEomyV6.20342	CIGENEomyV6.38278	96.75	676	18	2	1	676	676	1	672	672	0	1328	6	11	6-11	20771165	20783041	6p_11q	49730470	49748361	6p_11q	6p_11q	6p_11q	128484	1	1
CIGENEomyV6.35707	CIGENEomyV6.64605	94.17	721	29	2	479	1186	1186	502	1222	1304	0	1364	10	19	10-19	56005729	56023928	10q_19p	15479844	15497591	10q_19p	10q_19p	10q_19p	128447.88	0.61	0.55
CIGENEomyV6.20153	CIGENEomyV6.38097	89.3	776	82	1	1	776	776	1	775	775	0	1438	6	11	6-11	17444748	17463782	6p_11q	46529322	46560772	6p_11q	6p_11q	6p_11q	128413.4	1	1
CIGENEomyV6.42663	CIGENEomyV6.46053	97.1	725	18	1	1	722	722	1	725	725	0	1322	12	13	12-13	71646899	71657532	12q_13q	39929140	39941699	12q_13q	12q_13q	12q_13q	128366.2	1	1
CIGENEomyV6.43161	CIGENEomyV6.46510	98.74	637	8	0	1	637	643	210	846	864	0	1300	12	13	12-13	80669972	80708045	12q_13q	47295544	47344171	12q_13q	12q_13q	12q_13q	128362	0.99	0.74
CIGENEomyV6.32135	CIGENEomyV6.56800	86.86	913	86	2	1	881	884	1	911	914	0	1476	9	16	9-16	42927546	42974294	9q_16q	63122167	63211134	9q_16q	9q_16q	9q_16q	128205.36	1.03	1
CIGENEomyV6.16592	CIGENEomyV6.86584	90.34	776	66	3	1	767	767	1	776	776	0	1418	5	29	5-29	30061497	30067950	5p_29	23337677	23346137	5p_29	5p_29	5p_29	128102.12	1.01	1
CIGENEomyV6.48678	CIGENEomyV6.62777	95.78	664	28	0	1	664	921	1	664	679	0	1337	14	18	14-18	22205561	22398553	14p_18q	39942224	40002567	14p_18q	14p_18q	14p_18q	128057.86	0.72	0.98
CIGENEomyV6.45183	CIGENEomyV6.58456	96.21	660	25	0	645	1304	1305	1	660	665	0	1331	13	17	13-17	22091587	22171523	13p_17p	17960634	17989432	13p_17p	13p_17p	13p_17p	128055.51	0.51	0.99
CIGENEomyV6.14055	CIGENEomyV6.27310	92.11	798	36	4	1	797	797	1	772	772	0	1390	4	8	4-8	61184114	61208676	4q_8p	19472637	19495202	4q_8p	4q_8p	4q_8p	128032.9	1	1.03
CIGENEomyV6.10731	CIGENEomyV6.71788	97.58	661	16	0	1	661	668	1	661	1155	0	1312	3	22	3-22	68439100	68474580	3q_22q	27161271	27217864	3q_22q	3q_22q	3q_22q	128024.96	0.99	0.57
CIGENEomyV6.29375	CIGENEomyV6.84197	93	771	34	7	1	767	767	1	755	755	0	1376	8	28	8-28	72423731	72447150	8q_28	8013325	8029706	8q_28	8q_28	8q_28	127968	1	1.01
CIGENEomyV6.42436	CIGENEomyV6.45744	97.98	645	13	0	1	645	645	1	645	645	0	1306	12	13	12-13	66815802	66837312	12q_13q	33931472	33968059	12q_13q	12q_13q	12q_13q	127961.88	1	1
CIGENEomyV6.75519	CIGENEomyV6.82895	85.89	907	115	4	1	907	907	1	894	894	0	1489	24	27	24-27	24164744	24177625	24_27	27276513	27303859	24_27	24_27	24_27	127890.21	1	1.01
CIGENEomyV6.11346	CIGENEomyV6.71229	85.34	873	109	4	33	891	891	20	887	887	0	1498	3	22	3-22	79728782	79733972	3q_22p	12254982	12262904	3q_22p	3q_22p	3q_22p	127839.32	0.98	0.98
CIGENEomyV6.3902	CIGENEomyV6.8491	92.43	766	44	4	1	754	754	235	998	998	0	1382	2	3	2-3	5328223	5361132	2p_3p	14746751	14765780	2p_3p	2p_3p	2p_3p	127738.26	1.01	0.76
CIGENEomyV6.1797	CIGENEomyV6.6614	91.37	730	62	1	1	730	1192	1	729	1430	0	1397	1	2	1-2	41988473	42070214	1p_2q	71407055	71493893	1p_2q	1p_2q	1p_2q	127643.89	0.61	0.51
CIGENEomyV6.13003	CIGENEomyV6.18381	91.69	722	59	1	1	721	721	1	722	722	0	1392	4	5	4-5	28770364	28791719	4p_5q	73605233	73621129	4p_5q	4p_5q	4p_5q	127632.48	1	1
CIGENEomyV6.22266	CIGENEomyV6.81061	96.94	718	22	0	1	718	718	1	718	718	0	1316	6	26	6-26	70465233	70496681	6q_26	25366563	25407463	6q_26	6q_26	6q_26	127573.04	1	1
CIGENEomyV6.74874	CIGENEomyV6.82256	96.35	657	22	1	54	708	708	1	657	657	0	1324	24	27	24-27	9442367	9465241	24_27	12382836	12395080	24_27	24_27	24_27	127567.4	0.93	1
CIGENEomyV6.24787	CIGENEomyV6.59847	97.9	668	10	1	2	669	669	326	989	989	0	1303	7	17	7-17	45371259	45409706	7q_17q	52025046	52175239	7q_17q	7q_17q	7q_17q	127563.7	1	0.67
CIGENEomyV6.25148	CIGENEomyV6.59465	93.28	714	45	1	1	714	716	1	711	713	0	1367	7	17	7-17	53950835	53999694	7q_17q	43806745	43846117	7q_17q	7q_17q	7q_17q	127513.76	1	1
CIGENEomyV6.31512	CIGENEomyV6.56543	87.25	855	82	6	6	836	836	232	1083	1083	0	1461	9	16	9-16	27548802	27625421	9q_16q	57708333	57762483	9q_16q	9q_16q	9q_16q	127472.25	1.02	0.78
CIGENEomyV6.13047	CIGENEomyV6.18434	90.57	795	68	3	1	788	788	1	795	795	0	1407	4	5	4-5	30430870	30494190	4p_5q	75038021	75056217	4p_5q	4p_5q	4p_5q	127431.99	1.01	1
CIGENEomyV6.3924	CIGENEomyV6.8505	97.23	721	20	0	241	961	1004	1	721	721	0	1310	2	3	2-3	5625028	5636798	2p_3p	14876556	14889662	2p_3p	2p_3p	2p_3p	127371.3	0.72	1
CIGENEomyV6.14468	CIGENEomyV6.27848	92.56	766	49	2	5	767	813	1	761	763	0	1376	4	8	4-8	70076246	70106228	4q_8p	33929432	33956227	4q_8p	4q_8p	4q_8p	127362.56	0.94	1
CIGENEomyV6.20473	CIGENEomyV6.38398	93.87	718	44	0	1	718	718	1	718	718	0	1356	6	11	6-11	24282397	24302209	6p_11q	53258646	53283481	6p_11q	6p_11q	6p_11q	127287.72	1	1
CIGENEomyV6.16802	CIGENEomyV6.40623	90.79	749	65	2	1	749	749	1	745	745	0	1402	5	12	5-12	34709018	34735762	5p_12p	17204616	17232810	5p_12p	5p_12p	5p_12p	127287.58	1	1
CIGENEomyV6.75686	CIGENEomyV6.83033	91.55	793	65	2	1	793	794	1	791	795	0	1390	24	27	24-27	28449703	28470429	24_27	31008365	31029475	24_27	24_27	24_27	127254.5	1	0.99
CIGENEomyV6.37022	CIGENEomyV6.51765	93.73	702	20	2	1	678	678	1	702	702	0	1357	11	15	11-15	13744238	13756819	11p_15p	10949262	10969656	11p_15p	11p_15p	11p_15p	127191.61	1.03	1
CIGENEomyV6.1992	CIGENEomyV6.6819	87.11	900	102	8	1	894	894	1	892	892	0	1460	1	2	1-2	48282934	48337123	1p_2q	77320467	77398411	1p_2q	1p_2q	1p_2q	127180.6	1	1
CIGENEomyV6.24553	CIGENEomyV6.60110	84.32	931	118	9	1	921	966	85	997	1021	0	1508	7	17	7-17	37776022	37819818	7q_17q	59878318	59956529	7q_17q	7q_17q	7q_17q	127154.56	0.95	0.9
CIGENEomyV6.67641	CIGENEomyV6.74288	93.31	732	49	0	1	732	732	1	732	732	0	1362	20	23	20-23	24733856	24752464	20q_23	43484985	43515097	20q_23	20q_23	20q_23	127088.22	1	1
CIGENEomyV6.50158	CIGENEomyV6.77862	93.48	705	40	1	20	724	724	1	699	699	0	1359	14	25	14-25	56021007	56041436	14q_25p	28808011	28834896	14q_25p	14q_25p	14q_25p	127039.32	0.97	1.01
CIGENEomyV6.24469	CIGENEomyV6.60211	90.75	789	60	4	1	782	782	84	866	866	0	1399	7	17	7-17	35053188	35136648	7q_17q	62781575	63014771	7q_17q	7q_17q	7q_17q	126959.25	1	0.91
CIGENEomyV6.71473	CIGENEomyV6.9953	86.95	835	99	5	1	829	829	1	831	831	0	1460	22	3	3-22	18984398	19012302	3q_22p	48466839	48492683	3q_22p	3q_22p	3q_22p	126947	1	1
CIGENEomyV6.22327	CIGENEomyV6.81130	99.52	627	3	0	1	627	627	1	627	627	0	1275	6	26	6-26	72546671	72594219	6q_26	27879481	27935636	6q_26	6q_26	6q_26	126888	1	1
CIGENEomyV6.48525	CIGENEomyV6.62926	80.44	1135	137	16	1	1135	1253	1	1050	1083	0	1577	14	18	14-18	18471221	18498113	14p_18q	43870763	43888749	14p_18q	14p_18q	14p_18q	126853.88	0.89	1.03
CIGENEomyV6.12596	CIGENEomyV6.17953	89.69	766	76	2	1	763	763	1	766	766	0	1414	4	5	4-5	16878450	16933849	4p_5q	62355141	62384338	4p_5q	4p_5q	4p_5q	126821.66	1	1
CIGENEomyV6.17093	CIGENEomyV6.40307	95.7	674	29	0	364	1037	1037	1	674	674	0	1325	5	12	5-12	41140598	41195349	5p_12p	10814746	10877473	5p_12p	5p_12p	5p_12p	126802.5	0.65	1
CIGENEomyV6.21853	CIGENEomyV6.80645	96.79	685	15	2	1	685	699	1	678	692	0	1310	6	26	6-26	61041741	61049177	6q_26	15868499	15876283	6q_26	6q_26	6q_26	126794.9	0.98	0.99
CIGENEomyV6.24919	CIGENEomyV6.59714	93.48	690	44	1	1	689	950	1	690	690	0	1356	7	17	7-17	49414863	49424512	7q_17q	48662968	48670054	7q_17q	7q_17q	7q_17q	126758.88	0.73	1
CIGENEomyV6.17342	CIGENEomyV6.336	91.16	747	63	1	1	747	749	1	744	746	0	1390	5	1	1-5	48624943	48653093	1p_5q	6563618	6591650	1p_5q	1p_5q	1p_5q	126712.4	1	1
CIGENEomyV6.52835	CIGENEomyV6.69647	96.21	712	17	6	1	708	1169	1	706	1140	0	1317	15	21	15-21	41451982	41464787	15q_21p	26302810	26328072	15q_21p	15q_21p	15q_21p	126708.57	0.6	0.62
CIGENEomyV6.17532	CIGENEomyV6.556	88.36	859	78	5	133	989	1075	1	839	840	0	1434	5	1	1-5	53167441	53204119	1p_5q	11490426	11522381	1p_5q	1p_5q	1p_5q	126708.24	0.79	1.02
CIGENEomyV6.34985	CIGENEomyV6.86780	91.42	793	48	8	1	786	786	1	780	780	0	1386	10	29	10-29	39864708	39881023	10p_29	28349497	28356505	10p_29	10p_29	10p_29	126708.12	1	1.01
CIGENEomyV6.2171	CIGENEomyV6.55187	89.3	785	62	2	17	782	1001	1	782	880	0	1418	1	16	1-16	53013323	53108880	1q_16q	27145608	27164665	1q_16q	1q_16q	1q_16q	126627.4	0.78	0.89
CIGENEomyV6.24745	CIGENEomyV6.59895	89.15	839	82	4	31	864	864	71	905	905	0	1420	7	17	7-17	44173580	44224252	7q_17q	53319476	53364881	7q_17q	7q_17q	7q_17q	126593	0.97	0.92
CIGENEomyV6.3006	CIGENEomyV6.73523	97.06	646	19	0	1	646	646	1	646	947	0	1304	1	23	1-23	76335723	76545772	1q_23	21924065	22098993	1q_23	1q_23	1q_23	126566.24	1	0.68
CIGENEomyV6.49977	CIGENEomyV6.77701	95.81	668	27	1	1	668	668	1	667	667	0	1321	14	25	14-25	51860843	51881191	14q_25p	24546393	24573028	14q_25p	14q_25p	14q_25p	126565.01	1	1
CIGENEomyV6.67624	CIGENEomyV6.74263	93.48	736	46	2	1	736	736	1	734	734	0	1353	20	23	20-23	24336137	24342065	20q_23	43065639	43071669	20q_23	20q_23	20q_23	126478.44	1	1
CIGENEomyV6.35151	CIGENEomyV6.86995	99.51	618	3	0	1	618	618	1	618	618	0	1271	10	29	10-29	42335137	42343234	10p_29	31220764	31226565	10p_29	10p_29	10p_29	126477.21	1	1
CIGENEomyV6.3136	CIGENEomyV6.73602	81.25	976	120	8	858	1796	1797	1	950	1578	0	1555	1	23	1-23	79351516	79401528	1q_23	24711229	24760498	1q_23	1q_23	1q_23	126343.75	0.54	0.61
CIGENEomyV6.25231	CIGENEomyV6.59388	92.62	705	52	0	112	816	816	25	729	729	0	1363	7	17	7-17	55772984	55793989	7q_17q	41852735	41888231	7q_17q	7q_17q	7q_17q	126241.06	0.86	0.97
CIGENEomyV6.65422	CIGENEomyV6.78991	84.61	877	95	7	49	922	922	1	840	1134	0	1492	19	25	19-25	37278071	37317174	19q_25q	61075465	61097622	19q_25q	19q_25q	19q_25q	126238.12	0.94	0.77
CIGENEomyV6.74881	CIGENEomyV6.82260	98.15	648	10	1	3	650	650	1	646	646	0	1286	24	27	24-27	9593894	9600778	24_27	12517135	12522530	24_27	24_27	24_27	126220.9	1	1
CIGENEomyV6.49017	CIGENEomyV6.62411	89.64	907	88	3	1	905	905	1	903	903	0	1407	14	18	14-18	29659190	29704180	14p_18q	31953988	32120693	14p_18q	14p_18q	14p_18q	126123.48	1	1
CIGENEomyV6.45092	CIGENEomyV6.58324	94.97	676	30	3	1	676	676	1	672	672	0	1328	13	17	13-17	20097133	20117559	13p_17p	15748004	15759883	13p_17p	13p_17p	13p_17p	126120.16	1	1
CIGENEomyV6.75359	CIGENEomyV6.82712	96.77	651	21	0	1	651	684	1	651	716	0	1303	24	27	24-27	19774082	19797036	24_27	23059292	23081917	24_27	24_27	24_27	126091.31	0.95	0.91
CIGENEomyV6.28734	CIGENEomyV6.84753	99.03	621	6	0	4	624	624	13	633	633	0	1273	8	28	8-28	57780849	57793480	8q_28	22584970	22595657	8q_28	8q_28	8q_28	126065.19	1	0.98
CIGENEomyV6.4646	CIGENEomyV6.9213	93.92	740	31	2	1	740	740	89	814	814	0	1342	2	3	2-3	18157743	18174663	2p_3p	28097811	28134040	2p_3p	2p_3p	2p_3p	126040.64	1	0.91
CIGENEomyV6.22109	CIGENEomyV6.80908	89.25	828	46	4	616	1442	1559	1	786	787	0	1412	6	26	6-26	66676419	66812361	6q_26	21688059	21821547	6q_26	6q_26	6q_26	126021	0.53	1.05
CIGENEomyV6.32310	CIGENEomyV6.56012	89.43	795	80	2	1	794	803	3	794	811	0	1409	9	16	9-16	47992365	48000364	9q_16q	46542058	46552075	9q_16q	9q_16q	9q_16q	126006.87	0.99	0.98
CIGENEomyV6.28596	CIGENEomyV6.84815	91.34	820	53	5	1	805	805	1	817	817	0	1379	8	28	8-28	54470186	54504059	8q_28	24901774	24955885	8q_28	8q_28	8q_28	125957.86	1.01	1
CIGENEomyV6.75246	CIGENEomyV6.82619	84.54	912	134	4	1	911	916	1	906	907	0	1489	24	27	24-27	17264460	17269039	24_27	20512278	20517034	24_27	24_27	24_27	125880.06	0.99	1
CIGENEomyV6.28361	CIGENEomyV6.85046	93.17	688	47	0	1	688	688	198	885	885	0	1351	8	28	8-28	49267713	49282980	8q_28	29973166	30001975	8q_28	8q_28	8q_28	125872.67	1	0.78
CIGENEomyV6.75424	CIGENEomyV6.82774	96.76	680	21	1	56	735	806	4	682	682	0	1300	24	27	24-27	20922377	21016474	24_27	24112310	24181907	24_27	24_27	24_27	125788	0.84	1
CIGENEomyV6.14782	CIGENEomyV6.27595	86.34	820	84	3	1	794	794	1	818	818	0	1456	4	8	4-8	77694478	77744395	4q_8p	26779595	26811497	4q_8p	4q_8p	4q_8p	125711.04	1.03	1
CIGENEomyV6.2818	CIGENEomyV6.73346	92.4	737	53	1	1	734	744	1	737	745	0	1360	1	23	1-23	71095280	71118805	1q_23	15708147	15770128	1q_23	1q_23	1q_23	125664	0.99	0.99
CIGENEomyV6.42733	CIGENEomyV6.45986	97.79	634	13	1	1	633	649	1	634	634	0	1285	12	13	12-13	72806886	72810193	12q_13q	38821457	38835365	12q_13q	12q_13q	12q_13q	125660.15	0.98	1
CIGENEomyV6.20395	CIGENEomyV6.38311	92.59	729	50	2	331	1058	1058	3	728	728	0	1357	6	11	6-11	21874310	22049979	6p_11q	50816182	50897618	6p_11q	6p_11q	6p_11q	125644.63	0.69	1
CIGENEomyV6.36870	CIGENEomyV6.51933	86.28	882	92	11	1	861	861	1	874	874	0	1456	11	15	11-15	11375895	11384864	11p_15p	13266670	13276411	11p_15p	11p_15p	11p_15p	125623.68	1.01	1
CIGENEomyV6.25328	CIGENEomyV6.59256	82.16	1026	117	15	1	1009	1020	7	983	984	0	1529	7	17	7-17	58510778	58540632	7q_17q	38979382	38994449	7q_17q	7q_17q	7q_17q	125622.64	0.99	1.03
CIGENEomyV6.34262	CIGENEomyV6.41476	99.84	613	1	0	1	613	648	1	613	654	0	1258	10	12	10-12	17691122	17724794	10p_12p	40133833	40214818	10p_12p	10p_12p	10p_12p	125598.72	0.95	0.94
CIGENEomyV6.42682	CIGENEomyV6.46035	96.53	692	22	2	1	691	691	1	691	691	0	1301	12	13	12-13	71854972	71867066	12q_13q	39729269	39741239	12q_13q	12q_13q	12q_13q	125585.53	1	1
CIGENEomyV6.29275	CIGENEomyV6.84283	89.51	791	47	2	1	755	755	1	791	791	0	1403	8	28	8-28	70421114	70437501	8q_28	9591934	9604079	8q_28	8q_28	8q_28	125582.53	1.05	1
CIGENEomyV6.65550	CIGENEomyV6.78853	94.68	677	36	0	1	677	683	140	816	822	0	1326	19	25	19-25	40053044	40074205	19q_25q	58365043	58394324	19q_25q	19q_25q	19q_25q	125545.68	0.99	0.82
CIGENEomyV6.4593	CIGENEomyV6.9177	97.61	628	15	0	1	628	641	1	628	641	0	1285	2	3	2-3	17410600	17428957	2p_3p	27079646	27100390	2p_3p	2p_3p	2p_3p	125428.85	0.98	0.98
CIGENEomyV6.34866	CIGENEomyV6.40752	92.16	740	53	2	1	740	744	68	802	810	0	1360	10	12	10-12	36798067	36939401	10p_12p	20358999	20378737	10p_12p	10p_12p	10p_12p	125337.6	0.99	0.91
CIGENEomyV6.31084	CIGENEomyV6.70256	84.11	1133	149	8	1	1120	1120	160	1274	1274	0	1490	9	21	9-21	13713864	13749561	9p_21q	37557089	37642943	9p_21q	9p_21q	9p_21q	125323.9	1	0.88
CIGENEomyV6.35495	CIGENEomyV6.64697	99.35	614	4	0	1	614	614	1	614	614	0	1261	10	19	10-19	49825281	49860892	10q_19p	17467338	17523049	10q_19p	10q_19p	10q_19p	125280.35	1	1
CIGENEomyV6.34808	CIGENEomyV6.40812	86.37	895	83	4	1	869	869	1	882	882	0	1450	10	12	10-12	34929550	35003773	10p_12p	22235644	22311142	10p_12p	10p_12p	10p_12p	125236.5	1.03	1.01
CIGENEomyV6.49493	CIGENEomyV6.62280	93.45	702	46	0	18	719	719	27	728	728	0	1340	14	18	14-18	41974771	41996112	14p_18q	29200194	29244514	14p_18q	14p_18q	14p_18q	125223	0.98	0.96
CIGENEomyV6.49880	CIGENEomyV6.77553	85.63	821	118	0	1	821	821	1	821	828	0	1461	14	25	14-25	49864644	49891321	14q_25p	22498715	22502091	14q_25p	14q_25p	14q_25p	125105.43	1	0.99
CIGENEomyV6.65350	CIGENEomyV6.79038	90.65	759	54	4	28	786	786	2	743	743	0	1380	19	25	19-25	36033699	36090550	19q_25q	62295118	62342480	19q_25q	19q_25q	19q_25q	125097	0.96	1.02
CIGENEomyV6.34693	CIGENEomyV6.40960	97.59	622	15	0	1	622	652	1	622	891	0	1281	10	12	10-12	31860332	31944851	10p_12p	25213913	25338221	10p_12p	10p_12p	10p_12p	125012.79	0.95	0.7
CIGENEomyV6.53447	CIGENEomyV6.69020	95.21	773	30	3	1	773	801	505	1270	1448	0	1313	15	21	15-21	55034817	55041992	15q_21p	12972100	12983541	15q_21p	15q_21p	15q_21p	125010.73	0.96	0.53
CIGENEomyV6.53392	CIGENEomyV6.69104	94.52	748	35	1	1	748	748	1	742	742	0	1322	15	21	15-21	53555405	53573128	15q_21p	14572836	14584902	15q_21p	15q_21p	15q_21p	124955.44	1	1.01
CIGENEomyV6.42794	CIGENEomyV6.45933	95.29	722	33	1	5	725	725	11	732	732	0	1310	12	13	12-13	73819552	73834085	12q_13q	37854505	37866634	12q_13q	12q_13q	12q_13q	124829.9	0.99	0.98
CIGENEomyV6.22214	CIGENEomyV6.81002	98.27	636	11	0	11	646	646	509	1144	1144	0	1270	6	26	6-26	69220714	69303867	6q_26	24125906	24216487	6q_26	6q_26	6q_26	124802.9	0.98	0.56
CIGENEomyV6.4730	CIGENEomyV6.9307	92.79	777	54	1	1	777	777	49	823	823	0	1345	2	3	2-3	19971780	19988488	2p_3p	29935569	29958716	2p_3p	2p_3p	2p_3p	124802.55	1	0.94
CIGENEomyV6.25709	CIGENEomyV6.58922	93.68	680	43	0	1	680	680	1	680	680	0	1332	7	17	7-17	66453194	66476896	7q_17q	30613693	30636724	7q_17q	7q_17q	7q_17q	124781.76	1	1
CIGENEomyV6.42329	CIGENEomyV6.45625	98.56	623	9	0	1	623	623	1	623	623	0	1265	12	13	12-13	64637875	64668729	12q_13q	31818958	31853235	12q_13q	12q_13q	12q_13q	124678.4	1	1
CIGENEomyV6.75143	CIGENEomyV6.82510	95.14	699	30	2	1	697	697	1	697	697	0	1310	24	27	24-27	14951731	14962740	24_27	18003130	18014995	24_27	24_27	24_27	124633.4	1	1
CIGENEomyV6.32232	CIGENEomyV6.56086	91.81	843	44	7	1	826	826	1	835	835	0	1357	9	16	9-16	45953212	45983471	9q_16q	48481379	48499277	9q_16q	9q_16q	9q_16q	124586.17	1.01	1
CIGENEomyV6.28980	CIGENEomyV6.84514	97.75	623	14	0	1	623	629	1	623	1150	0	1274	8	28	8-28	64722830	64796204	8q_28	15519848	15589719	8q_28	8q_28	8q_28	124533.5	0.99	0.54
CIGENEomyV6.10572	CIGENEomyV6.71918	98.56	627	7	1	1	627	627	1	625	625	0	1263	3	22	3-22	65379025	65386902	3q_22q	30290917	30328044	3q_22q	3q_22q	3q_22q	124481.28	1	1
CIGENEomyV6.35288	CIGENEomyV6.87184	81.81	929	157	6	1	926	931	1	920	971	0	1521	10	29	10-29	44975913	45000367	10p_29	34548199	34560597	10p_29	10p_29	10p_29	124433.01	0.99	0.95
CIGENEomyV6.65781	CIGENEomyV6.78648	85.75	870	101	4	10	877	877	234	1082	1082	0	1451	19	25	19-25	44843109	44867493	19q_25q	53578462	53648262	19q_25q	19q_25q	19q_25q	124423.25	0.99	0.8
CIGENEomyV6.17014	CIGENEomyV6.40375	91.27	710	56	3	1	705	1140	1	709	710	0	1363	5	12	5-12	39103852	39178816	5p_12p	12523991	12575771	5p_12p	5p_12p	5p_12p	124401.01	0.62	1
CIGENEomyV6.53395	CIGENEomyV6.69100	91.05	860	64	3	1	847	1080	1	860	860	0	1366	15	21	15-21	53594171	53623860	15q_21p	14531439	14545366	15q_21p	15q_21p	15q_21p	124374.3	0.79	1
CIGENEomyV6.2017	CIGENEomyV6.6868	89.11	863	76	9	1	849	849	1	859	859	0	1395	1	2	1-2	49187368	49202886	1p_2q	78276089	78292938	1p_2q	1p_2q	1p_2q	124308.45	1.01	0.99
CIGENEomyV6.34698	CIGENEomyV6.40956	96.84	632	20	0	1	632	669	1	632	711	0	1283	10	12	10-12	32056009	32076007	10p_12p	25102467	25124657	10p_12p	10p_12p	10p_12p	124245.72	0.94	0.89
CIGENEomyV6.13878	CIGENEomyV6.27112	87.62	840	96	3	1	834	834	27	864	864	0	1418	4	8	4-8	55794493	55896058	4q_8p	13936792	14093012	4q_8p	4q_8p	4q_8p	124245.16	1	0.97
CIGENEomyV6.17777	CIGENEomyV6.860	99.67	604	2	0	1	604	604	30	633	633	0	1245	5	1	1-5	58279399	58288078	1p_5q	17907172	17915443	1p_5q	1p_5q	1p_5q	124089.15	1	0.95
CIGENEomyV6.54534	CIGENEomyV6.67060	88.82	769	61	5	1	769	769	1	744	744	0	1397	16	20	16-20	11125241	11158119	16p_20p	11757388	11791070	16p_20p	16p_20p	16p_20p	124081.54	0.99	1.03
CIGENEomyV6.42756	CIGENEomyV6.45968	99.34	603	4	0	1	603	603	1	603	603	0	1248	12	13	12-13	73164305	73183512	12q_13q	38504621	38522116	12q_13q	12q_13q	12q_13q	123976.32	1	1
CIGENEomyV6.50391	CIGENEomyV6.78088	92.78	789	41	5	1	777	777	1	785	785	0	1336	14	25	14-25	62463471	62469475	14q_25p	36349346	36385968	14q_25p	14q_25p	14q_25p	123954.08	1.01	1
CIGENEomyV6.24490	CIGENEomyV6.60193	86.98	814	58	5	1	810	810	1	770	770	0	1425	7	17	7-17	35582869	35625094	7q_17q	62353381	62375755	7q_17q	7q_17q	7q_17q	123946.5	1	1.05
CIGENEomyV6.23395	CIGENEomyV6.61537	99.67	602	2	0	1	602	846	44	645	649	0	1243	7	18	7-18	7194855	7230835	7p_18p	10489303	10509226	7p_18p	7p_18p	7p_18p	123889.81	0.71	0.93
CIGENEomyV6.52903	CIGENEomyV6.69587	97.22	647	16	1	1	645	645	1	647	647	0	1274	15	21	15-21	43774961	43856472	15q_21p	24242019	24302431	15q_21p	15q_21p	15q_21p	123858.28	1	1
CIGENEomyV6.10824	CIGENEomyV6.71721	92.63	719	50	2	1	718	718	1	717	717	0	1337	3	22	3-22	70256485	70270410	3q_22q	25479486	25487821	3q_22q	3q_22q	3q_22q	123846.31	1	1
CIGENEomyV6.17624	CIGENEomyV6.641	90.58	754	44	1	2	755	792	1	727	747	0	1367	5	1	1-5	55052267	55085688	1p_5q	13475353	13487204	1p_5q	1p_5q	1p_5q	123822.86	0.95	1.01
CIGENEomyV6.32220	CIGENEomyV6.56099	85.6	903	106	8	1	894	918	1	888	891	0	1446	9	16	9-16	45610260	45631028	9q_16q	48792739	48805966	9q_16q	9q_16q	9q_16q	123777.6	0.97	1
CIGENEomyV6.42813	CIGENEomyV6.45904	99.02	612	6	0	1	612	612	1	612	612	0	1250	12	13	12-13	74143128	74161044	12q_13q	37524081	37540850	12q_13q	12q_13q	12q_13q	123775	1	1
CIGENEomyV6.25630	CIGENEomyV6.58975	87.84	855	69	7	5	838	838	7	847	847	0	1409	7	17	7-17	64447592	64471418	7q_17q	32460976	32508948	7q_17q	7q_17q	7q_17q	123766.56	1.01	1
CIGENEomyV6.35746	CIGENEomyV6.64576	95.3	659	31	0	1	659	659	41	699	699	0	1298	10	19	10-19	56808930	56830145	10q_19p	14814874	14860077	10q_19p	10q_19p	10q_19p	123699.4	1	0.94
CIGENEomyV6.2628	CIGENEomyV6.73132	86.67	795	104	1	1	795	806	32	824	825	0	1426	1	23	1-23	65301219	65347991	1q_23	9844929	9867130	1q_23	1q_23	1q_23	123591.42	0.99	0.96
CIGENEomyV6.35315	CIGENEomyV6.87215	80.65	951	134	4	186	1087	1087	1	950	950	0	1531	10	29	10-29	45484128	45500681	10p_29	35141710	35157374	10p_29	10p_29	10p_29	123475.15	0.87	1
CIGENEomyV6.3695	CIGENEomyV6.8171	98.85	611	7	0	7	617	617	1	611	611	0	1249	2	3	2-3	2956657	2991564	2p_3p	10963646	10978949	2p_3p	2p_3p	2p_3p	123463.65	0.99	1
CIGENEomyV6.43140	CIGENEomyV6.46486	98.53	614	9	0	1	614	617	1	614	615	0	1253	12	13	12-13	80454199	80466102	12q_13q	47048955	47069505	12q_13q	12q_13q	12q_13q	123458.09	1	1
CIGENEomyV6.14024	CIGENEomyV6.27287	86.08	819	98	3	1	815	815	1	807	807	0	1434	4	8	4-8	60545163	60557703	4q_8p	18787252	18831473	4q_8p	4q_8p	4q_8p	123438.72	1	1.01
CIGENEomyV6.36060	CIGENEomyV6.64244	99.67	600	2	0	1	600	600	1	600	600	0	1238	10	19	10-19	64102192	64113798	10q_19p	8139916	8150334	10q_19p	10q_19p	10q_19p	123391.46	1	1
CIGENEomyV6.34783	CIGENEomyV6.40837	84.45	862	120	8	1	854	854	1	856	856	0	1461	10	12	10-12	34079269	34132584	10p_12p	23120480	23177882	10p_12p	10p_12p	10p_12p	123381.45	1	1
CIGENEomyV6.49079	CIGENEomyV6.62350	94.6	685	34	2	85	769	769	1	682	682	0	1304	14	18	14-18	30861903	30875557	14p_18q	31035854	31058769	14p_18q	14p_18q	14p_18q	123358.4	0.89	1
CIGENEomyV6.31597	CIGENEomyV6.56395	89.12	781	77	3	1	777	777	149	925	925	0	1384	9	16	9-16	29618303	29677570	9q_16q	55426298	55544702	9q_16q	9q_16q	9q_16q	123342.08	1	0.84
CIGENEomyV6.45225	CIGENEomyV6.58565	85.41	843	75	3	1	797	797	1	841	841	0	1444	13	17	13-17	23047679	23055383	13p_17p	20493631	20508321	13p_17p	13p_17p	13p_17p	123332.04	1.05	1
CIGENEomyV6.24600	CIGENEomyV6.60051	92.43	753	47	4	1	745	745	1	751	751	0	1334	7	17	7-17	39015072	39036143	7q_17q	58605360	58617874	7q_17q	7q_17q	7q_17q	123301.62	1.01	1
CIGENEomyV6.28480	CIGENEomyV6.84919	94.7	660	35	0	1	660	660	1	660	660	0	1302	8	28	8-28	51807721	51826303	8q_28	27611093	27626106	8q_28	8q_28	8q_28	123299.4	1	1
CIGENEomyV6.22036	CIGENEomyV6.80840	96.33	682	23	1	1	682	682	1	680	680	0	1279	6	26	6-26	64687550	64718731	6q_26	19853790	19901894	6q_26	6q_26	6q_26	123206.07	1	1
CIGENEomyV6.2805	CIGENEomyV6.73317	92.95	681	44	2	1	677	677	42	722	722	0	1325	1	23	1-23	70464853	70525559	1q_23	14937170	15007483	1q_23	1q_23	1q_23	123158.75	1	0.94
CIGENEomyV6.29039	CIGENEomyV6.84460	98.35	607	10	0	1	607	607	1	607	607	0	1251	8	28	8-28	66164625	66179156	8q_28	13944911	13988768	8q_28	8q_28	8q_28	123035.85	1	1
CIGENEomyV6.65136	CIGENEomyV6.79284	96.54	635	22	0	1	635	635	1	635	635	0	1274	19	25	19-25	30079981	30109795	19q_25q	68550918	68567323	19q_25q	19q_25q	19q_25q	122991.96	1	1
CIGENEomyV6.21715	CIGENEomyV6.80530	99.5	603	3	0	44	646	646	1	603	603	0	1234	6	26	6-26	57938726	57996365	6q_26	12858115	12899452	6q_26	6q_26	6q_26	122783	0.93	1
CIGENEomyV6.42875	CIGENEomyV6.46186	98.67	601	8	0	1	601	601	1	601	601	0	1244	12	13	12-13	75058518	75100458	12q_13q	41929214	41974726	12q_13q	12q_13q	12q_13q	122745.48	1	1
CIGENEomyV6.20780	CIGENEomyV6.38755	98.51	606	9	0	1	606	606	1	606	606	0	1246	6	11	6-11	31209854	31299842	6p_11q	60490747	60628559	6p_11q	6p_11q	6p_11q	122743.46	1	1
CIGENEomyV6.44841	CIGENEomyV6.58073	95.78	640	27	0	1	640	642	1	640	653	0	1281	13	17	13-17	15266700	15387062	13p_17p	11059480	11177595	13p_17p	13p_17p	13p_17p	122694.18	1	0.98
CIGENEomyV6.24668	CIGENEomyV6.59973	91.87	738	57	2	1	736	814	1	737	866	0	1335	7	17	7-17	40681458	40696065	7q_17q	56592281	56606485	7q_17q	7q_17q	7q_17q	122646.45	0.9	0.85
CIGENEomyV6.53483	CIGENEomyV6.68991	95.27	676	29	1	1	676	676	1	673	673	0	1287	15	21	15-21	56039437	56045520	15q_21p	12034200	12041625	15q_21p	15q_21p	15q_21p	122612.49	1	1
CIGENEomyV6.65110	CIGENEomyV6.79306	84.9	927	106	11	1	912	1509	1	908	915	0	1444	19	25	19-25	29249288	29311004	19q_25q	69421050	69472812	19q_25q	19q_25q	19q_25q	122595.6	0.61	1
CIGENEomyV6.75017	CIGENEomyV6.82391	97.59	623	15	0	1	623	623	14	636	636	0	1256	24	27	24-27	12127026	12153403	24_27	15134826	15161196	24_27	24_27	24_27	122573.04	1	0.98
CIGENEomyV6.12440	CIGENEomyV6.5746	93.99	666	33	1	1	666	666	1	659	659	0	1304	4	2	2-4	12995039	13012913	2q_4p	48235915	48256489	2q_4p	2q_4p	2q_4p	122562.96	1	1.01
CIGENEomyV6.5015	CIGENEomyV6.9605	96.04	632	25	0	1	632	632	1	632	632	0	1276	2	3	2-3	27196806	27203299	2p_3p	37160531	37167027	2p_3p	2p_3p	2p_3p	122547.04	1	1
CIGENEomyV6.29421	CIGENEomyV6.84169	89.43	889	73	9	1	874	874	1	883	883	0	1370	8	28	8-28	73138772	73256221	8q_28	7365029	7382000	8q_28	8q_28	8q_28	122519.1	1.01	1
CIGENEomyV6.21855	CIGENEomyV6.80647	98.03	610	12	0	1	610	610	1	610	610	0	1249	6	26	6-26	61141426	61228579	6q_26	15970613	16054788	6q_26	6q_26	6q_26	122439.47	1	1
CIGENEomyV6.42372	CIGENEomyV6.45667	93.19	690	45	1	1	690	690	1	688	688	0	1313	12	13	12-13	65660267	65670318	12q_13q	32799899	32807680	12q_13q	12q_13q	12q_13q	122358.47	1	1
CIGENEomyV6.21101	CIGENEomyV6.39104	91.17	849	74	1	1	848	848	190	1038	1038	0	1342	6	11	6-11	39504028	39538821	6p_11q	69726922	69764066	6p_11q	6p_11q	6p_11q	122350.14	1	0.82
CIGENEomyV6.4408	CIGENEomyV6.8962	98.35	607	10	0	1	607	607	1	607	607	0	1244	2	3	2-3	13845997	13933279	2p_3p	23613847	23702007	2p_3p	2p_3p	2p_3p	122347.4	1	1
CIGENEomyV6.1314	CIGENEomyV6.6115	95.21	668	27	2	9	675	690	149	812	893	0	1284	1	2	1-2	29614431	29627282	1p_2q	58983572	59045630	1p_2q	1p_2q	1p_2q	122249.64	0.97	0.75
CIGENEomyV6.28629	CIGENEomyV6.84783	80.53	935	123	3	1	880	880	1	931	931	0	1518	8	28	8-28	55931480	55997640	8q_28	23385642	23435610	8q_28	8q_28	8q_28	122244.54	1.06	1
CIGENEomyV6.25586	CIGENEomyV6.59021	90.34	756	54	8	1	745	745	1	748	748	0	1353	7	17	7-17	63659409	63679388	7q_17q	33405060	33418730	7q_17q	7q_17q	7q_17q	122230.02	1	1
CIGENEomyV6.14445	CIGENEomyV6.27891	90.27	771	57	4	1	768	769	1	756	768	0	1354	4	8	4-8	69585221	69608695	4q_8p	34815228	34844326	4q_8p	4q_8p	4q_8p	122225.58	1	1
CIGENEomyV6.50879	CIGENEomyV6.76742	97.89	616	11	1	1	616	616	1	614	755	0	1248	14	25	14-25	74138315	74161432	14q_25p	6806024	6818513	14q_25p	14q_25p	14q_25p	122166.72	1	0.81
CIGENEomyV6.4751	CIGENEomyV6.9337	95.85	651	27	0	1	651	651	1	651	651	0	1274	2	3	2-3	20240980	20301753	2p_3p	30230830	30355136	2p_3p	2p_3p	2p_3p	122112.9	1	1
CIGENEomyV6.42134	CIGENEomyV6.45447	98.18	604	11	0	1	604	852	1	604	604	0	1242	12	13	12-13	60052068	60069730	12q_13q	28324556	28337599	12q_13q	12q_13q	12q_13q	121939.56	0.71	1
CIGENEomyV6.28762	CIGENEomyV6.84733	93.83	664	40	1	1	663	663	1	664	664	0	1299	8	28	8-28	58798112	58807232	8q_28	21594261	21603795	8q_28	8q_28	8q_28	121885.17	1	1
CIGENEomyV6.75357	CIGENEomyV6.82709	99.17	602	5	0	1	602	657	1	602	652	0	1228	24	27	24-27	19715092	19731623	24_27	23014815	23024881	24_27	24_27	24_27	121780.76	0.92	0.92
CIGENEomyV6.24949	CIGENEomyV6.59682	94.69	678	35	1	1	677	677	1	678	678	0	1286	7	17	7-17	49895185	49903697	7q_17q	48131213	48143006	7q_17q	7q_17q	7q_17q	121771.34	1	1
CIGENEomyV6.48956	CIGENEomyV6.62466	91.32	726	61	1	2	725	725	1	726	726	0	1333	14	18	14-18	28526056	28533248	14p_18q	33222746	33231228	14p_18q	14p_18q	14p_18q	121729.56	1	1
CIGENEomyV6.16729	CIGENEomyV6.40695	85.53	988	110	11	1	976	976	1	967	967	0	1423	5	12	5-12	33298248	33332116	5p_12p	18617627	18667346	5p_12p	5p_12p	5p_12p	121709.19	1	1.01
CIGENEomyV6.64924	CIGENEomyV6.79517	95.6	659	29	0	1	659	659	105	763	763	0	1273	19	25	19-25	24502133	24517533	19q_25q	74296930	74308525	19q_25q	19q_25q	19q_25q	121698.8	1	0.86
CIGENEomyV6.17408	CIGENEomyV6.412	92.24	683	53	0	3	685	685	4	686	686	0	1319	5	1	1-5	50374610	50483744	1p_5q	8262138	8387891	1p_5q	1p_5q	1p_5q	121664.56	1	1
CIGENEomyV6.12220	CIGENEomyV6.5571	82.64	956	151	5	1	943	943	45	998	998	0	1472	4	2	2-4	8053269	8070247	2q_4p	43004073	43022040	2q_4p	2q_4p	2q_4p	121646.08	1.01	0.95
CIGENEomyV6.4794	CIGENEomyV6.9387	81.17	887	132	5	1	868	868	1	871	871	0	1498	2	3	2-3	20916195	20989715	2p_3p	31039618	31062762	2p_3p	2p_3p	2p_3p	121592.66	1.02	1.01
CIGENEomyV6.4669	CIGENEomyV6.9239	94.83	812	37	2	1	809	836	1	810	837	0	1282	2	3	2-3	18584653	18594005	2p_3p	28489158	28499095	2p_3p	2p_3p	2p_3p	121572.06	0.97	0.97
CIGENEomyV6.32132	CIGENEomyV6.56802	96.54	636	22	0	1	636	636	1	636	636	0	1259	9	16	9-16	42806670	42867520	9q_16q	63254311	63327962	9q_16q	9q_16q	9q_16q	121543.86	1	1
CIGENEomyV6.52947	CIGENEomyV6.69546	97.05	678	16	2	389	1062	1062	1	678	678	0	1251	15	21	15-21	44528264	44623866	15q_21p	23652913	23683721	15q_21p	15q_21p	15q_21p	121409.55	0.64	1
CIGENEomyV6.36588	CIGENEomyV6.52181	83.73	842	124	3	1	834	859	1	837	900	0	1450	11	15	11-15	3916934	3923023	11p_15p	19675381	19690355	11p_15p	11p_15p	11p_15p	121408.5	0.98	0.93
CIGENEomyV6.45075	CIGENEomyV6.58308	98.83	598	7	0	1	598	598	1	598	598	0	1228	13	17	13-17	19809055	19838212	13p_17p	15465567	15483427	13p_17p	13p_17p	13p_17p	121363.24	1	1
CIGENEomyV6.4225	CIGENEomyV6.8891	91.13	823	56	7	1	815	815	829	1642	1642	0	1331	2	3	2-3	9540494	9558649	2p_3p	22478167	22499086	2p_3p	2p_3p	2p_3p	121294.03	1	0.5
CIGENEomyV6.32029	CIGENEomyV6.55270	99.49	592	3	0	1	592	592	1	592	592	0	1219	9	16	9-16	39999098	40031496	9q_16q	30062201	30098578	9q_16q	9q_16q	9q_16q	121278.31	1	1
CIGENEomyV6.53394	CIGENEomyV6.69101	88.9	820	34	8	1	813	813	1	770	770	0	1364	15	21	15-21	53582807	53595397	15q_21p	14545404	14561967	15q_21p	15q_21p	15q_21p	121259.6	1	1.05
CIGENEomyV6.14479	CIGENEomyV6.27837	94.07	674	37	3	1	674	674	1	671	671	0	1289	4	8	4-8	70698444	70721417	4q_8p	33337326	33358802	4q_8p	4q_8p	4q_8p	121256.23	1	1
CIGENEomyV6.49878	CIGENEomyV6.77552	89.1	743	81	0	79	821	842	1	743	765	0	1360	14	25	14-25	49837792	49863712	14q_25p	22494393	22497011	14q_25p	14q_25p	14q_25p	121176	0.88	0.97
CIGENEomyV6.22338	CIGENEomyV6.81137	98.26	632	9	1	1	630	630	1	632	632	0	1233	6	26	6-26	72701394	72714207	6q_26	28030403	28042384	6q_26	6q_26	6q_26	121154.58	1	1
CIGENEomyV6.34069	CIGENEomyV6.41619	89.33	759	19	4	1	698	698	146	903	903	0	1356	10	12	10-12	12011458	12073287	10p_12p	45699070	45960393	10p_12p	10p_12p	10p_12p	121131.48	1.08	0.84
CIGENEomyV6.65554	CIGENEomyV6.78851	92.1	696	54	1	1	696	696	1	695	695	0	1315	19	25	19-25	40122396	40129605	19q_25q	58286254	58295618	19q_25q	19q_25q	19q_25q	121111.5	1	1
CIGENEomyV6.23583	CIGENEomyV6.61661	97.65	637	15	0	1	637	637	1	637	637	0	1240	7	18	7-18	10338709	10379850	7p_18p	12474925	12482927	7p_18p	7p_18p	7p_18p	121086	1	1
CIGENEomyV6.10004	CIGENEomyV6.71420	98.17	601	11	0	1	601	601	1	601	601	0	1233	3	22	3-22	50148882	50154393	3q_22p	17227749	17233364	3q_22p	3q_22p	3q_22p	121043.61	1	1
CIGENEomyV6.33879	CIGENEomyV6.41733	84.85	1036	140	7	2	1026	1026	1	1030	1030	0	1426	10	12	10-12	6988984	7004862	10p_12p	50094871	50114083	10p_12p	10p_12p	10p_12p	120996.1	1	1
CIGENEomyV6.35014	CIGENEomyV6.86824	93.98	698	38	2	1	694	694	1	698	698	0	1287	10	29	10-29	40229279	40245903	10p_29	28788783	28795379	10p_29	10p_29	10p_29	120952.26	1	1
CIGENEomyV6.16677	CIGENEomyV6.86662	96.76	648	21	0	1	648	671	11	658	681	0	1250	5	29	5-29	32687016	32721422	5p_29	25743318	25794143	5p_29	5p_29	5p_29	120950	0.97	0.95
CIGENEomyV6.16693	CIGENEomyV6.86678	89.12	781	75	3	1	778	778	1	774	774	0	1357	5	29	5-29	32895694	32917310	5p_29	25988612	25998641	5p_29	5p_29	5p_29	120935.84	1	1.01
CIGENEomyV6.1527	CIGENEomyV6.6338	97.37	646	17	0	1	646	646	1	646	646	0	1242	1	2	1-2	34748655	34897107	1p_2q	64248585	64359233	1p_2q	1p_2q	1p_2q	120933.54	1	1
CIGENEomyV6.16486	CIGENEomyV6.86478	93.09	724	41	4	1	715	715	1	724	724	0	1299	5	29	5-29	26578861	26589492	5p_29	19478771	19488440	5p_29	5p_29	5p_29	120923.91	1.01	0.99
CIGENEomyV6.13839	CIGENEomyV6.27063	95.9	658	27	0	161	818	819	3	660	1011	0	1260	4	8	4-8	54723759	54794921	4q_8p	12937230	13002501	4q_8p	4q_8p	4q_8p	120834	0.8	0.65
CIGENEomyV6.44784	CIGENEomyV6.57998	96.97	725	20	1	9	731	731	1	725	1348	0	1246	13	17	13-17	13395320	13452812	13p_17p	9129987	9233937	13p_17p	13p_17p	13p_17p	120824.62	0.99	0.54
CIGENEomyV6.22269	CIGENEomyV6.81062	94.74	684	34	1	1	682	682	1	684	684	0	1275	6	26	6-26	70506581	70516439	6q_26	25414476	25425457	6q_26	6q_26	6q_26	120793.5	1	1
CIGENEomyV6.23814	CIGENEomyV6.61840	97.56	616	15	0	1	616	618	170	785	787	0	1238	7	18	7-18	14971742	15005122	7p_18p	16871882	16890817	7p_18p	7p_18p	7p_18p	120779.28	1	0.78
CIGENEomyV6.2528	CIGENEomyV6.73040	98.35	605	10	0	45	649	649	1	605	605	0	1228	1	23	1-23	63052982	63101354	1q_23	7339453	7612180	1q_23	1q_23	1q_23	120773.8	0.93	1
CIGENEomyV6.49895	CIGENEomyV6.77574	85.82	790	112	0	11	800	800	1	790	790	0	1407	14	25	14-25	50031146	50033706	14q_25p	22674485	22676855	14q_25p	14q_25p	14q_25p	120748.74	0.99	1
CIGENEomyV6.19987	CIGENEomyV6.37927	85.26	909	68	9	1	847	847	325	1229	1229	0	1416	6	11	6-11	14191993	14224074	6p_11q	42841496	42911200	6p_11q	6p_11q	6p_11q	120728.16	1.06	0.73
CIGENEomyV6.4623	CIGENEomyV6.9194	94.45	685	26	3	1	674	674	1	684	684	0	1278	2	3	2-3	17781356	17813540	2p_3p	27458616	27487284	2p_3p	2p_3p	2p_3p	120707.1	1.01	1
CIGENEomyV6.10481	CIGENEomyV6.71980	88.3	812	74	10	1	807	807	1	796	796	0	1367	3	22	3-22	63762526	63801681	3q_22q	32196983	32201530	3q_22q	3q_22q	3q_22q	120706.1	0.99	1.01
CIGENEomyV6.65087	CIGENEomyV6.79327	83.56	894	136	6	1	886	886	1	891	891	0	1444	19	25	19-25	28833596	28843065	19q_25q	69922150	69935206	19q_25q	19q_25q	19q_25q	120660.64	1	1
CIGENEomyV6.23582	CIGENEomyV6.61657	92.15	688	53	1	1	688	692	1	687	701	0	1309	7	18	7-18	10319926	10338090	7p_18p	12394448	12409545	7p_18p	7p_18p	7p_18p	120624.35	0.99	0.98
CIGENEomyV6.2737	CIGENEomyV6.73264	95.48	642	29	0	4	645	645	1	642	642	0	1263	1	23	1-23	68447556	68538157	1q_23	13125496	13188420	1q_23	1q_23	1q_23	120591.24	1	1
CIGENEomyV6.29578	CIGENEomyV6.83980	97.84	602	13	0	1	602	602	1	602	602	0	1232	8	28	8-28	75418439	75470212	8q_28	2856597	2914559	8q_28	8q_28	8q_28	120538.88	1	1
CIGENEomyV6.74994	CIGENEomyV6.82361	94.73	645	34	0	1	645	645	1	645	645	0	1272	24	27	24-27	11633615	11671867	24_27	14622787	14673077	24_27	24_27	24_27	120496.56	1	1
CIGENEomyV6.1089	CIGENEomyV6.5908	84.54	899	121	5	1	896	896	4	887	887	0	1425	1	2	1-2	23824228	23837225	1p_2q	53361611	53387978	1p_2q	1p_2q	1p_2q	120469.5	1	1.01
CIGENEomyV6.21881	CIGENEomyV6.80672	97.38	611	13	1	1	608	608	1	611	611	0	1237	6	26	6-26	61821334	61838623	6q_26	16547201	16558418	6q_26	6q_26	6q_26	120459.06	1	1
CIGENEomyV6.44989	CIGENEomyV6.58212	96.08	664	24	2	27	688	820	1	664	666	0	1253	13	17	13-17	17979371	18018533	13p_17p	13636786	13662680	13p_17p	13p_17p	13p_17p	120388.24	0.81	0.99
CIGENEomyV6.34680	CIGENEomyV6.40987	97.03	606	18	0	44	649	852	76	681	682	0	1240	10	12	10-12	31509283	31519116	10p_12p	25760541	25779162	10p_12p	10p_12p	10p_12p	120317.2	0.71	0.89
CIGENEomyV6.12545	CIGENEomyV6.17900	86.58	805	93	5	1	802	802	1	793	793	0	1389	4	5	4-5	15739586	15773111	4p_5q	61164751	61295023	4p_5q	4p_5q	4p_5q	120259.62	1	1.01
CIGENEomyV6.35265	CIGENEomyV6.87147	82.98	899	121	9	1	878	878	25	912	912	0	1449	10	29	10-29	44450345	44459137	10p_29	33736163	33760656	10p_29	10p_29	10p_29	120238.02	1.01	0.98
CIGENEomyV6.34892	CIGENEomyV6.40713	84.19	816	128	1	1	816	857	1	815	941	0	1427	10	12	10-12	38001034	38065187	10p_12p	18941902	18981730	10p_12p	10p_12p	10p_12p	120139.13	0.95	0.87
CIGENEomyV6.20546	CIGENEomyV6.38479	97.99	598	12	0	1	598	602	1	598	600	0	1226	6	11	6-11	26322250	26335022	6p_11q	55401877	55420613	6p_11q	6p_11q	6p_11q	120135.74	0.99	1
CIGENEomyV6.34978	CIGENEomyV6.86775	95.34	665	30	1	1	665	686	1	664	668	0	1260	10	29	10-29	39703815	39755307	10p_29	28192856	28253723	10p_29	10p_29	10p_29	120128.4	0.97	0.99
CIGENEomyV6.13139	CIGENEomyV6.18640	83.88	943	141	7	35	971	971	742	1679	1809	0	1432	4	5	4-5	33528603	33589704	4p_5q	79345139	79409091	4p_5q	4p_5q	4p_5q	120116.16	0.96	0.52
CIGENEomyV6.44642	CIGENEomyV6.57885	99.08	651	4	1	1	651	651	1	649	649	0	1212	13	17	13-17	11199038	11211706	13p_17p	6972083	6993151	13p_17p	13p_17p	13p_17p	120084.96	1	1
CIGENEomyV6.25329	CIGENEomyV6.59254	88.75	791	68	9	1	785	785	1	776	776	0	1353	7	17	7-17	58532911	58544384	7q_17q	38962871	38978731	7q_17q	7q_17q	7q_17q	120078.75	1	1.01
CIGENEomyV6.10009	CIGENEomyV6.71412	92.06	680	53	1	1	680	680	4	682	682	0	1304	3	22	3-22	50328727	50372640	3q_22p	16991432	17027449	3q_22p	3q_22p	3q_22p	120046.24	1	1
CIGENEomyV6.49202	CIGENEomyV6.62174	83.87	843	128	4	1	836	837	187	1028	1064	0	1431	14	18	14-18	33816025	33825541	14p_18q	26518691	26542073	14p_18q	14p_18q	14p_18q	120017.97	1	0.79
CIGENEomyV6.13924	CIGENEomyV6.27173	91.61	775	47	6	1	757	757	1	775	775	0	1310	4	8	4-8	57583784	57659298	4q_8p	15759022	15867635	4q_8p	4q_8p	4q_8p	120009.1	1.02	0.99
CIGENEomyV6.35723	CIGENEomyV6.64591	86.58	842	47	6	174	1011	1011	31	810	810	0	1386	10	19	10-19	56494579	56620112	10q_19p	15023795	15073184	10q_19p	10q_19p	10q_19p	119999.88	0.83	1.03
CIGENEomyV6.44852	CIGENEomyV6.58086	96.27	671	21	2	1	671	671	1	667	1245	0	1246	13	17	13-17	15737895	15747328	13p_17p	11511811	11532588	13p_17p	13p_17p	13p_17p	119952.42	1	0.54
CIGENEomyV6.10794	CIGENEomyV6.71741	92.59	675	48	2	1	674	674	1	674	674	0	1295	3	22	3-22	69622803	69691014	3q_22q	25976302	26031882	3q_22q	3q_22q	3q_22q	119904.05	1	1
CIGENEomyV6.2336	CIGENEomyV6.72874	98.98	587	6	0	1	587	587	55	641	641	0	1211	1	23	1-23	58477635	58493743	1q_23	2982057	3009824	1q_23	1q_23	1q_23	119864.78	1	0.92
CIGENEomyV6.23655	CIGENEomyV6.61705	97.36	607	16	0	1	607	607	1	607	607	0	1231	7	18	7-18	11380730	11400288	7p_18p	13244731	13249168	7p_18p	7p_18p	7p_18p	119850.16	1	1
CIGENEomyV6.28962	CIGENEomyV6.84524	82.38	908	145	3	9	906	907	1	903	905	0	1454	8	28	8-28	64372713	64397751	8q_28	15851245	15885041	8q_28	8q_28	8q_28	119780.52	1	1
CIGENEomyV6.16689	CIGENEomyV6.86675	86.65	764	100	1	3	766	786	29	790	812	0	1382	5	29	5-29	32845782	32851210	5p_29	25912204	25918585	5p_29	5p_29	5p_29	119750.3	0.97	0.94
CIGENEomyV6.44822	CIGENEomyV6.58041	98.99	594	6	0	1	594	594	1	594	594	0	1209	13	17	13-17	14011481	14070849	13p_17p	9798373	9860236	13p_17p	13p_17p	13p_17p	119678.91	1	1
CIGENEomyV6.16165	CIGENEomyV6.86181	91.11	731	62	1	21	748	751	21	751	772	0	1313	5	29	5-29	18920185	18939218	5p_29	11165383	11193975	5p_29	5p_29	5p_29	119627.43	0.97	0.95
CIGENEomyV6.50310	CIGENEomyV6.78007	95.97	621	25	0	6	626	626	1	621	621	0	1246	14	25	14-25	60284039	60309766	14q_25p	33989035	34011639	14q_25p	14q_25p	14q_25p	119578.62	0.99	1
CIGENEomyV6.16319	CIGENEomyV6.86330	87.39	833	96	6	168	992	992	1	832	832	0	1368	5	29	5-29	22553184	22592505	5p_29	15173041	15204639	5p_29	5p_29	5p_29	119549.52	0.83	0.99
CIGENEomyV6.74693	CIGENEomyV6.82064	95.51	668	28	1	22	689	689	1	666	666	0	1251	24	27	24-27	5650706	5810320	24_27	8413859	8549822	24_27	24_27	24_27	119483.01	0.97	1
CIGENEomyV6.17316	CIGENEomyV6.284	97.44	625	15	1	16	639	640	5	629	972	0	1226	5	1	1-5	48035594	48134821	1p_5q	5549380	5608632	1p_5q	1p_5q	1p_5q	119461.44	0.98	0.64
CIGENEomyV6.13156	CIGENEomyV6.18673	94.96	674	32	2	69	741	741	32	704	704	0	1258	4	5	4-5	34405650	34698068	4p_5q	80242515	80338375	4p_5q	4p_5q	4p_5q	119459.68	0.91	0.95
CIGENEomyV6.12567	CIGENEomyV6.17926	96.24	611	23	0	5	615	623	1	611	611	0	1241	4	5	4-5	16227103	16253743	4p_5q	61700649	61745500	4p_5q	4p_5q	4p_5q	119433.84	0.98	1
CIGENEomyV6.50309	CIGENEomyV6.78001	94.6	667	29	1	32	698	701	92	751	754	0	1262	14	25	14-25	60255296	60278344	14q_25p	33855931	33969363	14q_25p	14q_25p	14q_25p	119385.2	0.95	0.88
CIGENEomyV6.48909	CIGENEomyV6.62530	94.94	672	33	1	1	672	672	1	671	671	0	1257	14	18	14-18	27632386	27639387	14p_18q	34159861	34169776	14p_18q	14p_18q	14p_18q	119339.58	1	1
CIGENEomyV6.15495	CIGENEomyV6.39983	93.56	714	44	2	1	713	714	140	852	855	0	1275	5	12	5-12	4454152	4494603	5p_12p	4958961	5055304	5p_12p	5p_12p	5p_12p	119289	1	0.83
CIGENEomyV6.64892	CIGENEomyV6.79563	87.39	793	87	4	1	788	788	1	785	785	0	1365	19	25	19-25	23696447	23720625	19q_25q	75088231	75121438	19q_25q	19q_25q	19q_25q	119287.35	1	1.01
CIGENEomyV6.24666	CIGENEomyV6.59976	87.79	770	81	3	1	759	901	1	768	801	0	1358	7	17	7-17	40640578	40652466	7q_17q	56638413	56649705	7q_17q	7q_17q	7q_17q	119218.82	0.85	0.96
CIGENEomyV6.2969	CIGENEomyV6.73485	80	990	153	10	1	977	977	1	958	958	0	1490	1	23	1-23	75198958	75237909	1q_23	20756129	20794201	1q_23	1q_23	1q_23	119200	1	1.02
CIGENEomyV6.16932	CIGENEomyV6.40478	92.46	716	54	0	260	975	975	274	989	989	0	1289	5	12	5-12	37616098	37633074	5p_12p	13977678	14013989	5p_12p	5p_12p	5p_12p	119180.94	0.73	0.72
CIGENEomyV6.10563	CIGENEomyV6.71925	86.64	786	98	4	3	787	787	1	780	780	0	1375	3	22	3-22	65284302	65298733	3q_22q	30394549	30401768	3q_22q	3q_22q	3q_22q	119130	0.99	1
CIGENEomyV6.42377	CIGENEomyV6.45676	91.54	768	42	6	49	803	803	91	848	1132	0	1301	12	13	12-13	65735672	65761530	12q_13q	32871611	32958984	12q_13q	12q_13q	12q_13q	119093.54	0.95	0.67
CIGENEomyV6.17606	CIGENEomyV6.630	91.38	708	55	4	13	718	718	77	780	780	0	1303	5	1	1-5	54745999	54875487	1p_5q	13144486	13300370	1p_5q	1p_5q	1p_5q	119068.14	0.98	0.9
CIGENEomyV6.65759	CIGENEomyV6.78668	96.1	616	24	0	284	899	899	1	616	616	0	1239	19	25	19-25	44159995	44236810	19q_25q	54167825	54240334	19q_25q	19q_25q	19q_25q	119067.9	0.69	1
CIGENEomyV6.2787	CIGENEomyV6.73305	91.57	688	56	2	1	687	687	1	687	687	0	1300	1	23	1-23	70105624	70142198	1q_23	14520582	14550449	1q_23	1q_23	1q_23	119041	1	1
CIGENEomyV6.32112	CIGENEomyV6.56820	86.63	860	99	5	1	852	1102	1	852	870	0	1374	9	16	9-16	42321781	42416057	9q_16q	63668570	63799487	9q_16q	9q_16q	9q_16q	119029.62	0.78	0.98
CIGENEomyV6.23853	CIGENEomyV6.61892	93.21	663	45	0	1	663	679	1	663	666	0	1277	7	18	7-18	15627523	15646039	7p_18p	17563812	17582523	7p_18p	7p_18p	7p_18p	119029.17	0.98	1
CIGENEomyV6.45072	CIGENEomyV6.58305	93.19	661	45	0	1	661	661	1	661	661	0	1277	13	17	13-17	19757360	19785711	13p_17p	15417809	15445984	13p_17p	13p_17p	13p_17p	119003.63	1	1
CIGENEomyV6.31287	CIGENEomyV6.70451	95.89	633	26	0	1	633	844	68	700	794	0	1241	9	21	9-21	20389237	20446456	9p_21q	44448993	44463069	9p_21q	9p_21q	9p_21q	118999.49	0.75	0.8
CIGENEomyV6.67764	CIGENEomyV6.74451	97.5	599	15	0	62	660	790	160	758	764	0	1220	20	23	20-23	27981429	28259022	20q_23	48215061	48712979	20q_23	20q_23	20q_23	118950	0.76	0.78
CIGENEomyV6.4901	CIGENEomyV6.9494	93	700	27	2	1	678	678	1	700	700	0	1279	2	3	2-3	23996708	24020341	2p_3p	34060505	34076616	2p_3p	2p_3p	2p_3p	118947	1.03	1
CIGENEomyV6.54590	CIGENEomyV6.67144	89.75	732	69	1	1	726	726	1	732	732	0	1325	16	20	16-20	12725555	12762977	16p_20p	13632221	13666740	16p_20p	16p_20p	16p_20p	118918.75	1.01	1
CIGENEomyV6.49896	CIGENEomyV6.77569	85.12	793	117	1	56	847	849	1	793	796	0	1397	14	25	14-25	50034841	50037387	14q_25p	22652939	22655498	14q_25p	14q_25p	14q_25p	118912.64	0.93	0.99
CIGENEomyV6.65292	CIGENEomyV6.79107	86.92	948	100	7	1	931	931	1	941	941	0	1368	19	25	19-25	34936995	34973748	19q_25q	63402024	63442317	19q_25q	19q_25q	19q_25q	118906.56	1.01	1
CIGENEomyV6.54709	CIGENEomyV6.67346	92.3	792	55	3	1	792	804	1	786	798	0	1288	16	20	16-20	15619710	15631303	16p_20p	18316640	18332073	16p_20p	16p_20p	16p_20p	118882.4	0.98	0.99
CIGENEomyV6.67888	CIGENEomyV6.73709	95.13	636	31	0	1	636	636	1	636	636	0	1249	20	23	20-23	31574116	31579612	20q_23	28117287	28177457	20q_23	20q_23	20q_23	118817.37	1	1
CIGENEomyV6.13782	CIGENEomyV6.27003	82.16	936	139	6	118	1042	1042	1	919	919	0	1446	4	8	4-8	53250622	53366100	4q_8p	11516685	11583327	4q_8p	4q_8p	4q_8p	118803.36	0.89	1.01
CIGENEomyV6.5788	CIGENEomyV6.925	97.19	606	15	1	23	628	628	1	604	604	0	1222	2	1	1-2	49279944	49326628	1p_2q	19657327	19659294	1p_2q	1p_2q	1p_2q	118766.18	0.96	1
CIGENEomyV6.71433	CIGENEomyV6.9994	92.55	805	54	3	90	892	892	112	912	912	0	1283	22	3	3-22	17616283	17657567	3q_22p	49710232	49770469	3q_22p	3q_22p	3q_22p	118741.65	0.9	0.88
CIGENEomyV6.35210	CIGENEomyV6.87067	96.69	604	20	0	242	845	845	1	604	604	0	1228	10	29	10-29	43228599	43245316	10p_29	32496258	32509073	10p_29	10p_29	10p_29	118735.32	0.71	1
CIGENEomyV6.33792	CIGENEomyV6.41850	95.82	622	26	0	551	1172	1172	1	622	622	0	1239	10	12	10-12	5127636	5172967	10p_12p	53050573	53077263	10p_12p	10p_12p	10p_12p	118720.98	0.53	1
CIGENEomyV6.13939	CIGENEomyV6.27197	91.33	692	22	4	1	673	673	28	700	700	0	1299	4	8	4-8	58004058	58164651	4q_8p	16156846	16319961	4q_8p	4q_8p	4q_8p	118637.67	1.02	0.98
CIGENEomyV6.28499	CIGENEomyV6.84907	93.44	655	43	0	1	655	690	91	745	748	0	1269	8	28	8-28	51999613	52019670	8q_28	27381139	27448341	8q_28	8q_28	8q_28	118575.36	0.95	0.88
CIGENEomyV6.37295	CIGENEomyV6.51441	92.6	662	48	1	1	661	661	1	662	662	0	1280	11	15	11-15	19686763	19700607	11p_15p	4293795	4312275	11p_15p	11p_15p	11p_15p	118528	1	1
CIGENEomyV6.20896	CIGENEomyV6.38857	87.33	789	57	3	1	746	750	1	789	820	0	1357	6	11	6-11	33925912	33942443	6p_11q	63606389	63649406	6p_11q	6p_11q	6p_11q	118506.81	1.05	0.96
CIGENEomyV6.53672	CIGENEomyV6.68764	98.67	600	5	1	10	609	609	202	798	798	0	1201	15	21	15-21	59038471	59050780	15q_21p	7699830	7725106	15q_21p	15q_21p	15q_21p	118502.67	0.98	0.75
CIGENEomyV6.35494	CIGENEomyV6.64698	89.75	722	44	1	1	722	722	1	692	692	0	1320	10	19	10-19	49805217	49818398	10q_19p	17529155	17542738	10q_19p	10q_19p	10q_19p	118470	1	1.04
CIGENEomyV6.21860	CIGENEomyV6.80653	97.91	621	11	1	8	626	626	1	621	621	0	1209	6	26	6-26	61343273	61373377	6q_26	16117931	16141076	6q_26	6q_26	6q_26	118373.19	0.99	1
CIGENEomyV6.16513	CIGENEomyV6.86499	94.54	659	28	2	1	651	651	1	659	659	0	1252	5	29	5-29	27013302	27017520	5p_29	19947538	19966351	5p_29	5p_29	5p_29	118364.08	1.01	1
CIGENEomyV6.74907	CIGENEomyV6.82287	96.37	662	21	2	1	662	662	1	659	659	0	1228	24	27	24-27	10118075	10144152	24_27	13044848	13074954	24_27	24_27	24_27	118342.36	1	1
CIGENEomyV6.65970	CIGENEomyV6.78450	82.44	911	130	9	250	1154	1154	22	908	908	0	1435	19	25	19-25	49271574	49334206	19q_25q	49024685	49104938	19q_25q	19q_25q	19q_25q	118301.4	0.78	0.99
CIGENEomyV6.71501	CIGENEomyV6.9927	82.89	836	80	3	1	836	836	1	773	773	0	1427	22	3	3-22	19494047	19525175	3q_22p	48054903	48084734	3q_22p	3q_22p	3q_22p	118284.03	1	1.08
CIGENEomyV6.4562	CIGENEomyV6.9131	98.56	626	9	0	21	646	722	21	646	646	0	1200	2	3	2-3	16764777	16783644	2p_3p	26400786	26408484	2p_3p	2p_3p	2p_3p	118272	0.87	0.97
CIGENEomyV6.10508	CIGENEomyV6.71954	85.45	818	103	5	1	811	821	63	871	881	0	1384	3	22	3-22	64091779	64101714	3q_22q	31678971	31716314	3q_22q	3q_22q	3q_22q	118262.8	0.99	0.92
CIGENEomyV6.75145	CIGENEomyV6.82513	98.63	584	8	0	104	687	925	1	584	584	0	1199	24	27	24-27	14970727	15292506	24_27	18211757	18352105	24_27	24_27	24_27	118257.37	0.63	1
CIGENEomyV6.20683	CIGENEomyV6.38636	81.02	1059	144	9	1	1012	1520	1	1049	1055	0	1459	6	11	6-11	29035039	29086421	6p_11q	58187203	58249105	6p_11q	6p_11q	6p_11q	118208.18	0.69	1
CIGENEomyV6.29277	CIGENEomyV6.84280	96.97	594	18	0	40	633	633	1	594	594	0	1219	8	28	8-28	70459305	70465399	8q_28	9567275	9577082	8q_28	8q_28	8q_28	118206.43	0.94	1
CIGENEomyV6.3857	CIGENEomyV6.8411	96.16	703	17	3	1	694	694	1	702	702	0	1229	2	3	2-3	4837393	4851499	2p_3p	13797220	13810536	2p_3p	2p_3p	2p_3p	118180.64	1.01	1
CIGENEomyV6.49765	CIGENEomyV6.77401	90.08	716	40	3	1	687	687	36	749	749	0	1311	14	25	14-25	47907979	47950451	14q_25p	20305738	20361835	14q_25p	14q_25p	14q_25p	118094.88	1.04	0.95
CIGENEomyV6.42326	CIGENEomyV6.45624	93.3	776	44	4	5	774	774	1	774	774	0	1265	12	13	12-13	64579180	64623831	12q_13q	31769656	31806249	12q_13q	12q_13q	12q_13q	118024.5	1	1
CIGENEomyV6.3860	CIGENEomyV6.8414	99.34	602	4	0	1	602	602	1	602	602	0	1188	2	3	2-3	4868014	4873949	2p_3p	13825630	13832303	2p_3p	2p_3p	2p_3p	118015.92	1	1
CIGENEomyV6.42859	CIGENEomyV6.46169	93.99	766	37	4	1	762	763	1	761	767	0	1255	12	13	12-13	74814909	74827199	12q_13q	41727912	41735399	12q_13q	12q_13q	12q_13q	117957.45	1	0.99
CIGENEomyV6.74860	CIGENEomyV6.82245	95.79	665	26	1	1	665	665	1	663	726	0	1231	24	27	24-27	9209617	9232449	24_27	12182772	12508173	24_27	24_27	24_27	117917.49	1	0.91
CIGENEomyV6.34704	CIGENEomyV6.40947	95.37	648	28	2	63	709	709	1	647	647	0	1236	10	12	10-12	32164528	32185258	10p_12p	25014481	25027937	10p_12p	10p_12p	10p_12p	117877.32	0.91	1
CIGENEomyV6.13684	CIGENEomyV6.26875	94.34	795	28	8	429	1211	1211	1	790	790	0	1249	4	8	4-8	50659356	50715332	4q_8p	9305647	9340293	4q_8p	4q_8p	4q_8p	117830.66	0.65	1
CIGENEomyV6.34670	CIGENEomyV6.41003	89.51	906	80	4	21	923	923	21	914	914	0	1316	10	12	10-12	31313765	31324476	10p_12p	25972711	25991722	10p_12p	10p_12p	10p_12p	117795.16	0.98	0.99
CIGENEomyV6.10521	CIGENEomyV6.71949	80.67	1076	164	14	1	1048	1060	7	1066	1078	0	1459	3	22	3-22	64389080	64439509	3q_22q	31384071	31451122	3q_22q	3q_22q	3q_22q	117697.53	1	0.99
CIGENEomyV6.1883	CIGENEomyV6.6684	88.56	743	82	2	1	742	1149	1	741	741	0	1329	1	2	1-2	44118018	44153774	1p_2q	73316776	73336603	1p_2q	1p_2q	1p_2q	117696.24	0.64	1
CIGENEomyV6.4699	CIGENEomyV6.9267	96.94	620	19	0	1	620	668	54	673	673	0	1214	2	3	2-3	19377808	19403612	2p_3p	29328429	29381998	2p_3p	2p_3p	2p_3p	117685.16	0.93	0.92
CIGENEomyV6.44840	CIGENEomyV6.58072	97.47	593	15	0	1	593	593	33	625	625	0	1207	13	17	13-17	15230183	15260370	13p_17p	11027544	11054827	13p_17p	13p_17p	13p_17p	117646.29	1	0.95
CIGENEomyV6.25575	CIGENEomyV6.59041	80.65	899	148	5	17	892	892	17	912	912	0	1458	7	17	7-17	63247691	63348897	7q_17q	33895910	33957527	7q_17q	7q_17q	7q_17q	117587.7	1	0.98
CIGENEomyV6.16026	CIGENEomyV6.86031	96.98	596	18	0	65	660	660	4	599	599	0	1212	5	29	5-29	15495411	15505786	5p_29	6971699	6988331	5p_29	5p_29	5p_29	117539.76	0.9	0.99
CIGENEomyV6.14534	CIGENEomyV6.27786	86.34	827	87	10	1	815	815	1	813	813	0	1361	4	8	4-8	72100198	72110384	4q_8p	31988274	32003605	4q_8p	4q_8p	4q_8p	117508.74	1	1
CIGENEomyV6.43194	CIGENEomyV6.46555	99.48	580	3	0	1	580	580	1	580	580	0	1181	12	13	12-13	81154452	81172909	12q_13q	47851113	47865668	12q_13q	12q_13q	12q_13q	117485.88	1	1
CIGENEomyV6.13990	CIGENEomyV6.27258	95.04	625	27	2	1	625	625	1	621	621	0	1236	4	8	4-8	59576743	59740974	4q_8p	17820412	17999090	4q_8p	4q_8p	4q_8p	117469.44	1	1
CIGENEomyV6.17542	CIGENEomyV6.564	84.22	805	127	0	5	809	809	3	807	807	0	1394	5	1	1-5	53352553	53365166	1p_5q	11630235	11643213	1p_5q	1p_5q	1p_5q	117402.68	1	1
CIGENEomyV6.67851	CIGENEomyV6.73670	89.41	727	42	4	19	711	711	74	799	799	0	1313	20	23	20-23	30356418	30378682	20q_23	26990641	27010130	20q_23	20q_23	20q_23	117395.33	1.02	0.9
CIGENEomyV6.4996	CIGENEomyV6.9580	92.55	658	49	0	367	1024	1024	7	664	664	0	1267	2	3	2-3	26423249	26434112	2p_3p	36402561	36412877	2p_3p	2p_3p	2p_3p	117260.85	0.64	0.99
CIGENEomyV6.4342	CIGENEomyV6.8792	89.34	732	78	0	1	732	732	231	962	962	0	1312	2	3	2-3	11965654	11972376	2p_3p	19935879	19984052	2p_3p	2p_3p	2p_3p	117214.08	1	0.76
CIGENEomyV6.45366	CIGENEomyV6.58508	97.58	619	15	0	1	619	619	1	619	619	0	1201	13	17	13-17	26277943	26505106	13p_17p	19310768	19344792	13p_17p	13p_17p	13p_17p	117193.58	1	1
CIGENEomyV6.44762	CIGENEomyV6.57927	99.64	561	2	0	1	561	562	1	561	644	0	1176	13	17	13-17	13077639	13118510	13p_17p	7624806	7656484	13p_17p	13p_17p	13p_17p	117176.64	1	0.87
CIGENEomyV6.48379	CIGENEomyV6.63410	92.33	665	49	1	610	1274	1274	1	663	663	0	1269	14	18	14-18	15216490	15268468	14p_18q	54178803	54266905	14p_18q	14p_18q	14p_18q	117166.77	0.52	1
CIGENEomyV6.20658	CIGENEomyV6.38601	92.11	684	54	0	1	684	684	1	684	684	0	1272	6	11	6-11	28674901	28705059	6p_11q	57842378	57886275	6p_11q	6p_11q	6p_11q	117163.92	1	1
CIGENEomyV6.24410	CIGENEomyV6.60284	91.73	689	57	0	17	705	728	18	706	724	0	1277	7	17	7-17	33284877	33305830	7q_17q	64754337	64772100	7q_17q	7q_17q	7q_17q	117139.21	0.95	0.95
CIGENEomyV6.65158	CIGENEomyV6.79249	92.56	699	44	2	1	692	1067	1	698	709	0	1265	19	25	19-25	30687975	30771388	19q_25q	67807909	67900996	19q_25q	19q_25q	19q_25q	117088.4	0.65	0.98
CIGENEomyV6.10266	CIGENEomyV6.72217	90.19	693	57	3	7	691	976	1	690	714	0	1298	3	22	3-22	57400590	57509166	3q_22q	38748122	38832970	3q_22q	3q_22q	3q_22q	117066.62	0.71	0.97
CIGENEomyV6.5024	CIGENEomyV6.9615	97.39	614	16	0	1	614	614	41	654	654	0	1202	2	3	2-3	27368143	27388129	2p_3p	37324971	37346332	2p_3p	2p_3p	2p_3p	117062.78	1	0.94
CIGENEomyV6.4591	CIGENEomyV6.9175	97.72	614	13	1	1	613	613	1	614	614	0	1197	2	3	2-3	17385483	17403827	2p_3p	27055569	27075782	2p_3p	2p_3p	2p_3p	116970.84	1	1
CIGENEomyV6.28799	CIGENEomyV6.84680	96.42	615	22	0	1	615	615	1	615	615	0	1212	8	28	8-28	60062921	60127363	8q_28	20280686	20374247	8q_28	8q_28	8q_28	116861.04	1	1
CIGENEomyV6.21135	CIGENEomyV6.39139	92.86	658	36	4	1	652	652	1	653	653	0	1258	6	11	6-11	40696683	40707718	6p_11q	70680129	70693906	6p_11q	6p_11q	6p_11q	116817.88	1	1
CIGENEomyV6.54659	CIGENEomyV6.67236	82.03	924	133	10	1	912	1061	1	903	904	0	1424	16	20	16-20	14580756	14594782	16p_20p	15638019	15687538	16p_20p	16p_20p	16p_20p	116810.72	0.86	1.01
CIGENEomyV6.22243	CIGENEomyV6.81034	93.56	683	42	2	1	683	683	1	681	681	0	1248	6	26	6-26	69716435	69727454	6q_26	24615540	24620584	6q_26	6q_26	6q_26	116762.88	1	1
CIGENEomyV6.36821	CIGENEomyV6.51982	93.61	657	41	1	1	657	657	1	656	656	0	1247	11	15	11-15	9807950	9837912	11p_15p	14858466	14885231	11p_15p	11p_15p	11p_15p	116731.67	1	1
CIGENEomyV6.21884	CIGENEomyV6.80676	99.12	571	5	0	1	571	571	1	571	571	0	1177	6	26	6-26	61856076	61895164	6q_26	16574091	16610684	6q_26	6q_26	6q_26	116664.24	1	1
CIGENEomyV6.74777	CIGENEomyV6.82152	91.27	722	22	1	2	723	723	152	832	832	0	1278	24	27	24-27	7064783	7090279	24_27	9826893	9865955	24_27	24_27	24_27	116643.06	1	0.87
CIGENEomyV6.14120	CIGENEomyV6.27363	86.51	860	98	6	10	860	862	3	853	855	0	1347	4	8	4-8	62467373	62504539	4q_8p	20740323	20750183	4q_8p	4q_8p	4q_8p	116528.97	0.99	1
CIGENEomyV6.20403	CIGENEomyV6.38322	94.35	620	35	0	13	632	632	13	632	632	0	1235	6	11	6-11	22154083	22209710	6p_11q	51125409	51141364	6p_11q	6p_11q	6p_11q	116522.25	0.98	0.98
CIGENEomyV6.49029	CIGENEomyV6.62409	86.29	1094	135	6	477	1565	1565	12	1095	1095	0	1350	14	18	14-18	29854906	29895680	14p_18q	31921681	31929024	14p_18q	14p_18q	14p_18q	116491.5	0.7	0.99
CIGENEomyV6.12752	CIGENEomyV6.18110	85.44	783	101	3	1	777	777	1	776	776	0	1363	4	5	4-5	22161457	22183005	4p_5q	67427042	67453149	4p_5q	4p_5q	4p_5q	116454.72	1	1.01
CIGENEomyV6.17622	CIGENEomyV6.638	95.37	605	28	0	1	605	605	1	605	605	0	1221	5	1	1-5	55010352	55022181	1p_5q	13428416	13436685	1p_5q	1p_5q	1p_5q	116446.77	1	1
CIGENEomyV6.68130	CIGENEomyV6.73895	92.18	678	21	1	1	678	678	360	1005	1194	0	1263	20	23	20-23	36564908	36619840	20q_23	34053924	34248695	20q_23	20q_23	20q_23	116423.34	1	0.57
CIGENEomyV6.20277	CIGENEomyV6.38224	97.22	611	17	0	1	611	611	1	611	1043	0	1197	6	11	6-11	19688416	19714811	6p_11q	48712025	48896290	6p_11q	6p_11q	6p_11q	116372.34	1	0.59
CIGENEomyV6.4414	CIGENEomyV6.8973	96.79	592	19	0	1	592	592	1	592	592	0	1202	2	3	2-3	14038660	14074298	2p_3p	23825189	23847973	2p_3p	2p_3p	2p_3p	116341.58	1	1
CIGENEomyV6.29398	CIGENEomyV6.84185	96.6	618	21	0	1	618	618	1	618	618	0	1204	8	28	8-28	72769029	72774776	8q_28	7734240	7738257	8q_28	8q_28	8q_28	116306.4	1	1
CIGENEomyV6.42443	CIGENEomyV6.45754	88.48	738	51	4	510	1225	1237	1	726	730	0	1314	12	13	12-13	67129092	67159579	12q_13q	34246734	34275655	12q_13q	12q_13q	12q_13q	116262.72	0.59	1.01
CIGENEomyV6.12564	CIGENEomyV6.17923	90.44	732	69	1	1	731	731	84	815	815	0	1285	4	5	4-5	16188178	16212383	4p_5q	61651889	61696748	4p_5q	4p_5q	4p_5q	116215.4	1	0.9
CIGENEomyV6.5046	CIGENEomyV6.9633	97.82	597	13	0	1	597	605	1	597	622	0	1188	2	3	2-3	27747871	27764799	2p_3p	37713258	37729609	2p_3p	2p_3p	2p_3p	116210.16	0.99	0.96
CIGENEomyV6.74574	CIGENEomyV6.81883	98.14	590	11	0	1	590	590	7	596	596	0	1184	24	27	24-27	2154196	2170541	24_27	3974279	3995483	24_27	24_27	24_27	116197.76	1	0.99
CIGENEomyV6.23415	CIGENEomyV6.61551	95.86	942	26	3	1	940	1245	1	931	934	0	1212	7	18	7-18	7471979	7493717	7p_18p	10751130	10765595	7p_18p	7p_18p	7p_18p	116182.32	0.75	1.01
CIGENEomyV6.22262	CIGENEomyV6.81060	98.61	574	8	0	51	624	624	8	581	581	0	1178	6	26	6-26	70438672	70456251	6q_26	25331122	25356564	6q_26	6q_26	6q_26	116162.58	0.92	0.99
CIGENEomyV6.12474	CIGENEomyV6.17824	94.1	695	22	3	1	676	676	1	695	695	0	1234	4	5	4-5	14089204	14133464	4p_5q	59704275	59790000	4p_5q	4p_5q	4p_5q	116119.4	1.02	1
CIGENEomyV6.21504	CIGENEomyV6.80301	93.73	638	39	1	10	647	647	12	648	648	0	1238	6	26	6-26	51479454	51503863	6q_26	6407589	6451499	6q_26	6q_26	6q_26	116037.74	0.98	0.98
CIGENEomyV6.44639	CIGENEomyV6.57878	99.13	575	5	0	1	575	575	1	575	575	0	1170	13	17	13-17	11135591	11169731	13p_17p	6928981	6939113	13p_17p	13p_17p	13p_17p	115982.1	1	1
CIGENEomyV6.28100	CIGENEomyV6.85386	82.14	952	121	12	1	912	912	1	943	943	0	1412	8	28	8-28	42765494	42797862	8q_28	35345693	35370352	8q_28	8q_28	8q_28	115981.68	1.03	1
CIGENEomyV6.20042	CIGENEomyV6.37981	95.26	612	29	0	188	799	799	5	616	616	0	1217	6	11	6-11	15102753	15158348	6p_11q	43974644	44072498	6p_11q	6p_11q	6p_11q	115931.42	0.77	0.99
CIGENEomyV6.64988	CIGENEomyV6.79414	93.54	681	40	3	1	681	681	1	677	677	0	1239	19	25	19-25	26260356	26311545	19q_25q	72323252	72376016	19q_25q	19q_25q	19q_25q	115896.06	1	1
CIGENEomyV6.42918	CIGENEomyV6.46245	99.29	564	4	0	315	878	878	1	564	564	0	1167	12	13	12-13	76024865	76059471	12q_13q	42973415	42981338	12q_13q	12q_13q	12q_13q	115871.43	0.64	1
CIGENEomyV6.44717	CIGENEomyV6.57970	99.28	558	4	0	22	579	579	1	558	558	0	1167	13	17	13-17	12165658	12217319	13p_17p	8487148	8531114	13p_17p	13p_17p	13p_17p	115859.76	0.96	1
CIGENEomyV6.48528	CIGENEomyV6.62922	91.78	852	52	6	1	843	843	1	843	843	0	1262	14	18	14-18	18503055	18553395	14p_18q	43810501	43840046	14p_18q	14p_18q	14p_18q	115826.36	1	1
CIGENEomyV6.10125	CIGENEomyV6.71296	90.77	704	59	3	1	703	703	1	699	699	0	1276	3	22	3-22	52924157	52935054	3q_22p	14375002	14384527	3q_22p	3q_22p	3q_22p	115822.52	1	1
CIGENEomyV6.10653	CIGENEomyV6.71836	98.31	591	10	0	1	591	591	1	591	591	0	1178	3	22	3-22	66988656	66994823	3q_22q	28458086	28468394	3q_22q	3q_22q	3q_22q	115809.18	1	1
CIGENEomyV6.10005	CIGENEomyV6.71417	81.9	851	126	6	4	828	832	6	854	858	0	1414	3	22	3-22	50263252	50278179	3q_22p	17076113	17092555	3q_22p	3q_22p	3q_22p	115806.6	1.02	0.98
CIGENEomyV6.16096	CIGENEomyV6.86107	97.14	595	17	0	1	595	595	1	595	595	0	1192	5	29	5-29	17881388	17890706	5p_29	10101825	10117263	5p_29	5p_29	5p_29	115790.88	1	1
CIGENEomyV6.45093	CIGENEomyV6.58325	98.09	576	11	0	27	602	602	1	576	576	0	1179	13	17	13-17	20109081	20122363	13p_17p	15760781	15780061	13p_17p	13p_17p	13p_17p	115648.11	0.96	1
CIGENEomyV6.48745	CIGENEomyV6.62700	92.96	653	34	1	62	714	715	1	641	1037	0	1244	14	18	14-18	24068251	24122025	14p_18q	37814816	37890837	14p_18q	14p_18q	14p_18q	115642.24	0.91	0.63
CIGENEomyV6.1138	CIGENEomyV6.5966	96.75	616	15	1	1	611	611	1	616	616	0	1195	1	2	1-2	24941778	24978092	1p_2q	54577423	54612069	1p_2q	1p_2q	1p_2q	115616.25	1.01	1
CIGENEomyV6.1730	CIGENEomyV6.6547	88.43	743	86	0	1	743	749	1	743	794	0	1307	1	2	1-2	40459339	40543146	1p_2q	69751029	69823410	1p_2q	1p_2q	1p_2q	115578.01	0.99	0.94
CIGENEomyV6.31692	CIGENEomyV6.55490	82.6	845	136	5	1	835	1197	1	844	859	0	1399	9	16	9-16	32315911	32363342	9q_16q	36215332	36305610	9q_16q	9q_16q	9q_16q	115557.4	0.7	0.98
CIGENEomyV6.36584	CIGENEomyV6.52186	81.24	890	151	7	8	889	889	1	882	882	0	1422	11	15	11-15	3873281	3883696	11p_15p	19771114	19780389	11p_15p	11p_15p	11p_15p	115523.28	0.99	1
CIGENEomyV6.5824	CIGENEomyV6.958	93.48	644	39	2	4	644	644	2	645	645	0	1235	2	1	1-2	50209743	50231575	1p_2q	20766924	20790150	1p_2q	1p_2q	1p_2q	115447.8	1	1
CIGENEomyV6.37451	CIGENEomyV6.52551	85.91	823	90	6	5	820	823	1	804	807	0	1343	11	15	11-15	25110847	25209545	11p_15p	32618485	32722434	11p_15p	11p_15p	11p_15p	115377.13	0.99	1.01
CIGENEomyV6.2170	CIGENEomyV6.55181	99.29	561	4	0	1	561	574	1	561	577	0	1162	1	16	1-16	53005692	53017229	1q_16q	27069113	27089283	1q_16q	1q_16q	1q_16q	115374.98	0.98	0.97
CIGENEomyV6.74879	CIGENEomyV6.82257	95.81	621	26	0	1	621	626	2	622	623	0	1204	24	27	24-27	9551522	9564834	24_27	12390468	12483056	24_27	24_27	24_27	115355.24	0.99	1
CIGENEomyV6.53341	CIGENEomyV6.69147	93.7	635	37	2	1	633	633	12	645	645	0	1231	15	21	15-21	52960130	52968631	15q_21p	15064330	15074652	15q_21p	15q_21p	15q_21p	115344.7	1	0.98
CIGENEomyV6.12608	CIGENEomyV6.17959	94.76	611	32	0	1	611	611	1	611	611	0	1217	4	5	4-5	17068174	17079674	4p_5q	62513414	62522160	4p_5q	4p_5q	4p_5q	115322.92	1	1
CIGENEomyV6.10022	CIGENEomyV6.71395	96.39	610	22	0	1	610	623	460	1069	1070	0	1196	3	22	3-22	51108344	51157227	3q_22p	16268937	16326900	3q_22p	3q_22p	3q_22p	115282.44	0.98	0.57
CIGENEomyV6.31490	CIGENEomyV6.56563	92.44	648	25	2	289	912	912	1	648	648	0	1247	9	16	9-16	27024901	27192208	9q_16q	58169432	58286796	9q_16q	9q_16q	9q_16q	115272.68	0.71	1
CIGENEomyV6.25635	CIGENEomyV6.58973	95.72	607	26	0	1	607	607	1	607	607	0	1203	7	17	7-17	64528368	64546651	7q_17q	32420524	32442731	7q_17q	7q_17q	7q_17q	115151.16	1	1
CIGENEomyV6.50180	CIGENEomyV6.77881	94.37	675	37	1	1	674	674	5	679	679	0	1220	14	25	14-25	56466536	56478523	14q_25p	29253320	29277042	14q_25p	14q_25p	14q_25p	115131.4	1	0.99
CIGENEomyV6.43064	CIGENEomyV6.46416	97.97	590	12	0	1	590	590	1	590	590	0	1175	12	13	12-13	79114142	79117857	12q_13q	45672931	45676546	12q_13q	12q_13q	12q_13q	115114.75	1	1
CIGENEomyV6.53182	CIGENEomyV6.69318	93.49	645	41	1	131	775	775	1	644	644	0	1231	15	21	15-21	50454078	50460881	15q_21p	18008475	18025743	15q_21p	15q_21p	15q_21p	115086.19	0.83	1
CIGENEomyV6.12492	CIGENEomyV6.17836	96.21	607	23	0	1	607	607	1	607	607	0	1196	4	5	4-5	14342618	14390528	4p_5q	59960561	60003971	4p_5q	4p_5q	4p_5q	115067.16	1	1
CIGENEomyV6.1808	CIGENEomyV6.6627	94.23	659	38	0	155	813	813	1	659	659	0	1221	1	2	1-2	42410042	42550777	1p_2q	71754933	71824118	1p_2q	1p_2q	1p_2q	115054.83	0.81	1
CIGENEomyV6.74924	CIGENEomyV6.82304	93.23	635	43	0	1	635	635	1	635	635	0	1234	24	27	24-27	10382516	10391470	24_27	13304042	13316665	24_27	24_27	24_27	115045.82	1	1
CIGENEomyV6.13633	CIGENEomyV6.26818	96.51	601	21	0	1	601	823	1	601	603	0	1192	4	8	4-8	48930674	48961760	4q_8p	7767216	7795210	4q_8p	4q_8p	4q_8p	115039.92	0.73	1
CIGENEomyV6.20900	CIGENEomyV6.38859	84.99	773	112	2	1	772	772	19	788	788	0	1352	6	11	6-11	34047062	34085975	6p_11q	63684705	63728870	6p_11q	6p_11q	6p_11q	114906.48	1	0.98
CIGENEomyV6.12858	CIGENEomyV6.18216	92.32	690	46	3	1	687	688	1	686	863	0	1244	4	5	4-5	24375748	24424847	4p_5q	69636838	69711720	4p_5q	4p_5q	4p_5q	114846.08	1	0.8
CIGENEomyV6.10090	CIGENEomyV6.71318	96.59	587	15	1	1	582	582	1	587	587	0	1189	3	22	3-22	52400160	52419404	3q_22p	14856580	14879851	3q_22p	3q_22p	3q_22p	114845.51	1.01	1
CIGENEomyV6.19811	CIGENEomyV6.37799	94.81	616	32	0	1	616	616	1	616	616	0	1211	6	11	6-11	8589006	8596102	6p_11q	37137835	37379834	6p_11q	6p_11q	6p_11q	114814.91	1	1
CIGENEomyV6.17790	CIGENEomyV6.884	83.61	915	124	12	1	895	895	1	909	909	0	1373	5	1	1-5	58710327	58763149	1p_5q	18357923	18384672	1p_5q	1p_5q	1p_5q	114796.53	1.01	0.99
CIGENEomyV6.75467	CIGENEomyV6.82819	95.18	623	29	1	1	622	622	3	625	625	0	1206	24	27	24-27	22379858	22387056	24_27	25471974	25478856	24_27	24_27	24_27	114787.08	1	1
CIGENEomyV6.42137	CIGENEomyV6.45449	97.1	586	17	0	1	586	588	29	614	621	0	1182	12	13	12-13	60086120	60104863	12q_13q	28343815	28365346	12q_13q	12q_13q	12q_13q	114772.2	1	0.94
CIGENEomyV6.42578	CIGENEomyV6.45883	97.17	600	17	0	1	600	600	1	600	600	0	1181	12	13	12-13	69940222	69943026	12q_13q	37122375	37125132	12q_13q	12q_13q	12q_13q	114757.77	1	1
CIGENEomyV6.48194	CIGENEomyV6.63225	89	709	78	0	1	709	722	17	725	736	0	1289	14	18	14-18	11054125	11075622	14p_18q	50077366	50118421	14p_18q	14p_18q	14p_18q	114721	0.98	0.96
CIGENEomyV6.16549	CIGENEomyV6.86535	94.57	626	34	0	50	675	691	20	645	658	0	1213	5	29	5-29	28940883	28978038	5p_29	22009942	22093738	5p_29	5p_29	5p_29	114713.41	0.91	0.95
CIGENEomyV6.1124	CIGENEomyV6.5943	93.71	636	37	1	228	863	863	1	633	633	0	1224	1	2	1-2	24538182	24643576	1p_2q	54071157	54078055	1p_2q	1p_2q	1p_2q	114701.04	0.74	1
CIGENEomyV6.1872	CIGENEomyV6.6670	90.65	706	64	1	1	704	704	1	706	706	0	1265	1	2	1-2	43923172	43946989	1p_2q	73100207	73115903	1p_2q	1p_2q	1p_2q	114672.25	1	1
CIGENEomyV6.52945	CIGENEomyV6.69553	94.81	616	32	0	7	622	622	1	616	616	0	1209	15	21	15-21	44506341	44518259	15q_21p	23764367	23774910	15q_21p	15q_21p	15q_21p	114625.29	0.99	1
CIGENEomyV6.75718	CIGENEomyV6.83200	90.88	691	43	4	1	689	689	1	673	673	0	1261	24	27	24-27	29027778	29043628	24_27	35067818	35079462	24_27	24_27	24_27	114599.68	1	1.02
CIGENEomyV6.23823	CIGENEomyV6.61850	99.29	560	4	0	1	560	560	1	560	560	0	1154	7	18	7-18	15128297	15131886	7p_18p	17016589	17019987	7p_18p	7p_18p	7p_18p	114580.66	1	1
CIGENEomyV6.65598	CIGENEomyV6.78795	94.14	648	35	1	1	648	648	1	645	645	0	1217	19	25	19-25	41036357	41086545	19q_25q	57182133	57206674	19q_25q	19q_25q	19q_25q	114568.38	1	1
CIGENEomyV6.16788	CIGENEomyV6.40639	94.27	628	35	1	1	628	628	1	627	627	0	1215	5	12	5-12	34349117	34364555	5p_12p	17593180	17607961	5p_12p	5p_12p	5p_12p	114538.05	1	1
CIGENEomyV6.74765	CIGENEomyV6.82136	92.27	660	47	4	14	670	671	14	672	815	0	1241	24	27	24-27	6805802	6811804	24_27	9575017	9584922	24_27	24_27	24_27	114507.07	0.98	0.8
CIGENEomyV6.1564	CIGENEomyV6.6407	87.04	733	92	1	68	797	797	391	1123	1123	0	1315	1	2	1-2	36258799	36292876	1p_2q	65686981	65721276	1p_2q	1p_2q	1p_2q	114457.6	0.92	0.65
CIGENEomyV6.52887	CIGENEomyV6.69605	95.37	626	21	2	1	620	620	26	649	649	0	1200	15	21	15-21	43271496	43341998	15q_21p	24738635	24812442	15q_21p	15q_21p	15q_21p	114444	1.01	0.96
CIGENEomyV6.33810	CIGENEomyV6.41837	92.44	661	32	2	1	656	937	1	648	657	0	1238	10	12	10-12	5399884	5512557	10p_12p	52734243	52802803	10p_12p	10p_12p	10p_12p	114440.72	0.7	1
CIGENEomyV6.32869	CIGENEomyV6.55499	83.41	838	119	5	1	821	821	1	835	835	0	1372	9	16	9-16	59483086	59518414	9q_16q	36380923	36401024	9q_16q	9q_16q	9q_16q	114438.52	1.01	1
CIGENEomyV6.34496	CIGENEomyV6.41231	94.73	607	32	0	1	607	607	1	607	607	0	1206	10	12	10-12	25732811	25830586	10p_12p	31350396	31486195	10p_12p	10p_12p	10p_12p	114244.38	1	1
CIGENEomyV6.35519	CIGENEomyV6.64678	85.48	902	74	6	757	1613	1613	1	890	890	0	1336	10	19	10-19	50272895	50302739	10q_19p	17114367	17160035	10q_19p	10q_19p	10q_19p	114201.28	0.56	1.01
CIGENEomyV6.24601	CIGENEomyV6.60050	89.15	710	74	2	1	709	709	1	708	708	0	1281	7	17	7-17	39058361	39073452	7q_17q	58586638	58595961	7q_17q	7q_17q	7q_17q	114201.15	1	1
CIGENEomyV6.43015	CIGENEomyV6.46358	98.6	570	8	0	1	570	570	1	570	570	0	1158	12	13	12-13	78489525	78494800	12q_13q	45091846	45095842	12q_13q	12q_13q	12q_13q	114178.8	1	1
CIGENEomyV6.42887	CIGENEomyV6.46206	97.73	618	12	2	1	617	617	1	617	617	0	1168	12	13	12-13	75417899	75423861	12q_13q	42350663	42356975	12q_13q	12q_13q	12q_13q	114148.64	1	1
CIGENEomyV6.75219	CIGENEomyV6.82584	96.13	595	23	0	5	599	599	11	605	605	0	1187	24	27	24-27	16763249	16775304	24_27	19939523	19954432	24_27	24_27	24_27	114106.31	0.99	0.98
CIGENEomyV6.49688	CIGENEomyV6.77333	86.37	763	87	5	1	761	761	1	748	748	0	1321	14	25	14-25	46571846	46599323	14q_25p	18822991	18844939	14q_25p	14q_25p	14q_25p	114094.77	1	1.01
CIGENEomyV6.53151	CIGENEomyV6.69359	92.52	709	48	3	1	708	708	1	705	705	0	1233	15	21	15-21	49630249	49644835	15q_21p	18889589	18909478	15q_21p	15q_21p	15q_21p	114077.16	1	1
CIGENEomyV6.22099	CIGENEomyV6.80904	98.59	568	8	0	1	568	568	1	568	568	0	1157	6	26	6-26	66334275	66376317	6q_26	21298303	21338809	6q_26	6q_26	6q_26	114068.63	1	1
CIGENEomyV6.32517	CIGENEomyV6.55813	98.41	565	9	0	1	565	565	1	565	565	0	1159	9	16	9-16	52024610	52038066	9q_16q	42848666	42865784	9q_16q	9q_16q	9q_16q	114057.19	1	1
CIGENEomyV6.28101	CIGENEomyV6.85392	96.57	612	20	1	1	611	611	1	612	612	0	1181	8	28	8-28	42789535	42819285	8q_28	35602157	35614197	8q_28	8q_28	8q_28	114049.17	1	1
CIGENEomyV6.34155	CIGENEomyV6.41560	85.32	797	103	5	100	893	1507	1	786	797	0	1336	10	12	10-12	15292635	15406795	10p_12p	42567543	42607322	10p_12p	10p_12p	10p_12p	113987.52	0.53	0.99
CIGENEomyV6.20100	CIGENEomyV6.38050	85.14	801	114	4	1	800	1384	1	797	798	0	1338	6	11	6-11	16299565	16337267	6p_11q	45248651	45324981	6p_11q	6p_11q	6p_11q	113917.32	0.58	1
CIGENEomyV6.2048	CIGENEomyV6.6889	84.8	954	99	8	1	933	949	1	929	945	0	1342	1	2	1-2	49533787	49548681	1p_2q	78642266	78656651	1p_2q	1p_2q	1p_2q	113801.6	1	1
CIGENEomyV6.65819	CIGENEomyV6.78621	81.37	891	144	6	407	1286	1288	139	1018	1019	0	1398	19	25	19-25	45696397	45727078	19q_25q	52729138	52733295	19q_25q	19q_25q	19q_25q	113755.26	0.69	0.87
CIGENEomyV6.16680	CIGENEomyV6.86667	94.07	674	32	4	1	671	672	1	669	672	0	1209	5	29	5-29	32762297	32777409	5p_29	25831478	25846334	5p_29	5p_29	5p_29	113730.63	1	1
CIGENEomyV6.4415	CIGENEomyV6.8974	94.65	636	33	1	1	636	636	1	635	635	0	1201	2	3	2-3	14104181	14120931	2p_3p	23862415	23880267	2p_3p	2p_3p	2p_3p	113674.65	1	1
CIGENEomyV6.21931	CIGENEomyV6.80737	88.59	824	60	10	1	796	796	1	818	818	0	1283	6	26	6-26	62947275	62959428	6q_26	18036715	18048604	6q_26	6q_26	6q_26	113660.97	1.02	1
CIGENEomyV6.45105	CIGENEomyV6.58354	86.93	773	48	2	1	726	727	1	767	847	0	1307	13	17	13-17	20434903	20449826	13p_17p	16184883	16259296	13p_17p	13p_17p	13p_17p	113617.51	1.06	0.91
CIGENEomyV6.10739	CIGENEomyV6.71779	88.75	738	81	1	1	738	738	1	736	736	0	1280	3	22	3-22	68556320	68572670	3q_22q	27044863	27059438	3q_22q	3q_22q	3q_22q	113600	1	1
CIGENEomyV6.48625	CIGENEomyV6.62834	96.43	588	21	0	1	588	589	20	607	616	0	1177	14	18	14-18	20851003	20870662	14p_18q	41607330	41642069	14p_18q	14p_18q	14p_18q	113498.11	1	0.95
CIGENEomyV6.44851	CIGENEomyV6.58085	99.11	559	5	0	1	559	559	1	559	559	0	1145	13	17	13-17	15726204	15737502	13p_17p	11504001	11511215	13p_17p	13p_17p	13p_17p	113480.95	1	1
CIGENEomyV6.28959	CIGENEomyV6.84532	91.51	683	55	1	1	683	915	1	680	681	0	1240	8	28	8-28	64075323	64184898	8q_28	16138133	16221708	8q_28	8q_28	8q_28	113472.4	0.75	1
CIGENEomyV6.42323	CIGENEomyV6.45621	98.84	602	6	1	1	601	601	1	602	602	0	1148	12	13	12-13	64493389	64554256	12q_13q	31678632	31736182	12q_13q	12q_13q	12q_13q	113468.32	1	1
CIGENEomyV6.53297	CIGENEomyV6.69186	85.44	790	96	7	9	792	792	1	777	777	0	1328	15	21	15-21	52173558	52181700	15q_21p	15879826	15886075	15q_21p	15q_21p	15q_21p	113464.32	0.99	1.01
CIGENEomyV6.4125	CIGENEomyV6.8697	87.82	731	32	2	1	674	674	1	731	731	0	1292	2	3	2-3	8236676	8248252	2p_3p	17902932	17919737	2p_3p	2p_3p	2p_3p	113463.44	1.08	1
CIGENEomyV6.31224	CIGENEomyV6.70393	90.3	670	60	1	1	670	673	1	665	667	0	1256	9	21	9-21	18554486	18574657	9p_21q	42444239	42456762	9p_21q	9p_21q	9p_21q	113416.8	0.99	1
CIGENEomyV6.1782	CIGENEomyV6.6604	93.26	638	24	5	1	620	620	77	713	713	0	1216	1	2	1-2	41768528	41799021	1p_2q	71175928	71201030	1p_2q	1p_2q	1p_2q	113404.16	1.02	0.89
CIGENEomyV6.34756	CIGENEomyV6.40879	94.37	622	34	1	1	621	624	1	622	625	0	1201	10	12	10-12	33139763	33157433	10p_12p	23940842	23972239	10p_12p	10p_12p	10p_12p	113338.37	1	0.99
CIGENEomyV6.10097	CIGENEomyV6.71310	91.25	697	29	2	1	670	671	23	714	728	0	1242	3	22	3-22	52523332	52550813	3q_22p	14738551	14767971	3q_22p	3q_22p	3q_22p	113332.5	1.04	0.95
CIGENEomyV6.28649	CIGENEomyV6.84776	81.3	952	154	8	26	956	956	14	962	1158	0	1394	8	28	8-28	56346304	56364520	8q_28	23042611	23065474	8q_28	8q_28	8q_28	113332.2	0.99	0.82
CIGENEomyV6.1942	CIGENEomyV6.6756	91.17	702	45	3	1	697	711	202	891	905	0	1243	1	2	1-2	46258162	46287241	1p_2q	75370007	75387994	1p_2q	1p_2q	1p_2q	113324.31	0.98	0.77
CIGENEomyV6.24362	CIGENEomyV6.60358	89.61	760	67	5	403	1154	1157	1	756	870	0	1264	7	17	7-17	31583801	31643824	7q_17q	66276356	66371352	7q_17q	7q_17q	7q_17q	113267.04	0.65	0.87
CIGENEomyV6.17416	CIGENEomyV6.417	84.02	926	95	6	1	897	897	1	902	902	0	1348	5	1	1-5	50536303	50566785	1p_5q	8452650	8488822	1p_5q	1p_5q	1p_5q	113258.96	1.03	1.02
CIGENEomyV6.25751	CIGENEomyV6.58878	94.85	602	31	0	1	602	602	1	602	602	0	1194	7	17	7-17	67297167	67322187	7q_17q	29390571	29423193	7q_17q	7q_17q	7q_17q	113250.9	1	1
CIGENEomyV6.1023	CIGENEomyV6.5875	94.91	609	31	0	22	630	630	1	609	609	0	1193	1	2	1-2	21725319	21802025	1p_2q	51231100	51258447	1p_2q	1p_2q	1p_2q	113227.63	0.97	1
CIGENEomyV6.45085	CIGENEomyV6.58318	82.74	1037	105	18	1	1007	1454	1	993	993	0	1368	13	17	13-17	19986665	20029292	13p_17p	15646271	15684281	13p_17p	13p_17p	13p_17p	113188.32	0.7	1.03
CIGENEomyV6.74855	CIGENEomyV6.82234	96.81	627	16	2	3	627	638	1	625	625	0	1169	24	27	24-27	9089595	9120474	24_27	12047971	12074726	24_27	24_27	24_27	113170.89	0.98	1
CIGENEomyV6.20300	CIGENEomyV6.38243	86.57	797	80	8	1	783	783	1	784	784	0	1307	6	11	6-11	20246175	20260247	6p_11q	49252377	49276413	6p_11q	6p_11q	6p_11q	113146.99	1.01	1.01
CIGENEomyV6.34230	CIGENEomyV6.41508	87.96	781	86	3	1	776	776	1	778	778	0	1286	10	12	10-12	16754821	16811341	10p_12p	41135836	41188322	10p_12p	10p_12p	10p_12p	113116.56	1	1
CIGENEomyV6.49107	CIGENEomyV6.62282	94.65	635	31	3	1	635	635	1	632	632	0	1195	14	18	14-18	31444511	31472831	14p_18q	29254909	29272666	14p_18q	14p_18q	14p_18q	113106.75	1	1
CIGENEomyV6.65138	CIGENEomyV6.79283	87.61	710	83	2	1	706	706	1	709	709	0	1291	19	25	19-25	30115359	30136916	19q_25q	68520887	68548980	19q_25q	19q_25q	19q_25q	113104.51	1	1
CIGENEomyV6.65063	CIGENEomyV6.79363	94.03	636	38	0	71	706	752	4	639	664	0	1202	19	25	19-25	28216535	28269827	19q_25q	70543139	70546922	19q_25q	19q_25q	19q_25q	113024.06	0.85	0.96
CIGENEomyV6.4306	CIGENEomyV6.8819	98.39	560	9	0	1	560	560	1	560	560	0	1148	2	3	2-3	11466381	11474430	2p_3p	20473389	20488037	2p_3p	2p_3p	2p_3p	112951.72	1	1
CIGENEomyV6.22224	CIGENEomyV6.81012	97.12	590	17	0	1	590	590	21	610	610	0	1162	6	26	6-26	69458347	69493298	6q_26	24358930	24389298	6q_26	6q_26	6q_26	112853.44	1	0.97
CIGENEomyV6.16199	CIGENEomyV6.86218	89.97	698	61	5	1	692	707	1	695	918	0	1254	5	29	5-29	19659820	19725214	5p_29	12043642	12099471	5p_29	5p_29	5p_29	112822.38	0.98	0.75
CIGENEomyV6.65420	CIGENEomyV6.78992	89.56	728	73	3	1	727	727	1	726	726	0	1259	19	25	19-25	37220090	37270623	19q_25q	61102308	61149373	19q_25q	19q_25q	19q_25q	112756.04	1	1
CIGENEomyV6.4639	CIGENEomyV6.9208	93.02	630	39	2	1	630	632	1	625	671	0	1212	2	3	2-3	17994804	18006201	2p_3p	27934802	27948551	2p_3p	2p_3p	2p_3p	112740.24	0.99	0.94
CIGENEomyV6.34384	CIGENEomyV6.41347	92.88	730	43	5	1	723	723	30	757	757	0	1213	10	12	10-12	22414370	22477177	10p_12p	34878435	34923075	10p_12p	10p_12p	10p_12p	112663.44	1	0.96
CIGENEomyV6.37447	CIGENEomyV6.52552	81.29	1026	144	15	1	1010	1024	192	1185	1186	0	1385	11	15	11-15	25021963	25032880	11p_15p	32741543	32837176	11p_15p	11p_15p	11p_15p	112586.65	0.99	0.85
CIGENEomyV6.75463	CIGENEomyV6.82815	94.05	656	34	1	1	656	656	1	651	651	0	1197	24	27	24-27	22332337	22363012	24_27	25434720	25449352	24_27	24_27	24_27	112577.85	1	1.01
CIGENEomyV6.1445	CIGENEomyV6.6260	86.2	855	99	6	1	841	1447	1	850	1456	0	1306	1	2	1-2	32483301	32504590	1p_2q	62022530	62044275	1p_2q	1p_2q	1p_2q	112577.2	0.59	0.58
CIGENEomyV6.24662	CIGENEomyV6.59987	95.36	603	28	0	1	603	603	1	603	603	0	1180	7	17	7-17	40520628	40530765	7q_17q	56804596	56814713	7q_17q	7q_17q	7q_17q	112524.8	1	1
CIGENEomyV6.4413	CIGENEomyV6.8969	93.66	647	34	3	1	640	640	1	647	647	0	1201	2	3	2-3	13999433	14018697	2p_3p	23775852	23800351	2p_3p	2p_3p	2p_3p	112485.66	1.01	1
CIGENEomyV6.23352	CIGENEomyV6.61498	97.2	607	15	2	51	656	656	1	606	606	0	1157	7	18	7-18	6382491	6402848	7p_18p	9714040	9718533	7p_18p	7p_18p	7p_18p	112460.4	0.92	1
CIGENEomyV6.54811	CIGENEomyV6.66769	97.6	584	12	1	1	582	582	1	584	584	0	1152	16	20	16-20	17600703	17627102	16p_20p	4913925	4942832	16p_20p	16p_20p	16p_20p	112435.2	1	1
CIGENEomyV6.31615	CIGENEomyV6.56365	91.82	672	26	2	1	670	670	1	645	645	0	1224	9	16	9-16	30285900	30333070	9q_16q	54806077	54834885	9q_16q	9q_16q	9q_16q	112387.68	1	1.04
CIGENEomyV6.45383	CIGENEomyV6.58538	96.2	605	23	0	1	605	969	1	605	619	0	1168	13	17	13-17	26923037	26977879	13p_17p	19888439	19929943	13p_17p	13p_17p	13p_17p	112361.6	0.62	0.98
CIGENEomyV6.1772	CIGENEomyV6.6584	86.01	786	86	5	1	775	847	1	773	776	0	1306	1	2	1-2	41435669	41462083	1p_2q	70858087	70879917	1p_2q	1p_2q	1p_2q	112329.06	0.92	1.01
CIGENEomyV6.29458	CIGENEomyV6.84140	94.06	623	37	0	1	623	623	6	628	628	0	1194	8	28	8-28	73631418	73727670	8q_28	6873526	6936415	8q_28	8q_28	8q_28	112307.64	1	0.99
CIGENEomyV6.52979	CIGENEomyV6.69513	85.32	790	113	1	15	801	834	1	790	791	0	1316	15	21	15-21	45364633	45375268	15q_21p	22954315	22964585	15q_21p	15q_21p	15q_21p	112281.12	0.95	1
CIGENEomyV6.34854	CIGENEomyV6.40763	90.46	692	64	2	1	692	692	1	690	690	0	1241	10	12	10-12	36513442	36522215	10p_12p	20732886	20751207	10p_12p	10p_12p	10p_12p	112260.86	1	1
CIGENEomyV6.25261	CIGENEomyV6.59334	95.62	593	14	1	24	616	616	132	712	712	0	1173	7	17	7-17	56470588	56532740	7q_17q	41066971	41239378	7q_17q	7q_17q	7q_17q	112162.26	0.96	0.83
CIGENEomyV6.42501	CIGENEomyV6.45809	98.38	556	9	0	1	556	556	1	556	556	0	1140	12	13	12-13	68358151	68416820	12q_13q	35532219	35590292	12q_13q	12q_13q	12q_13q	112153.2	1	1
CIGENEomyV6.12714	CIGENEomyV6.18061	82.94	815	119	6	1	812	812	1	798	798	0	1352	4	5	4-5	20266265	20289739	4p_5q	65701192	65721523	4p_5q	4p_5q	4p_5q	112134.88	1	1.01
CIGENEomyV6.65649	CIGENEomyV6.78755	97.73	572	13	0	1	572	572	1	572	572	0	1147	19	25	19-25	42061962	42069190	19q_25q	56196345	56208278	19q_25q	19q_25q	19q_25q	112096.31	1	1
CIGENEomyV6.28621	CIGENEomyV6.84795	86.61	784	79	9	1	781	781	1	761	761	0	1294	8	28	8-28	55532321	55558105	8q_28	23837001	23876449	8q_28	8q_28	8q_28	112073.34	0.99	1.02
CIGENEomyV6.54537	CIGENEomyV6.67074	80.61	882	133	10	17	875	877	61	927	929	0	1390	16	20	16-20	11256216	11275299	16p_20p	11891554	11963124	16p_20p	16p_20p	16p_20p	112047.9	0.99	0.94
CIGENEomyV6.22270	CIGENEomyV6.81064	94.3	649	32	3	1	644	644	1	649	649	0	1188	6	26	6-26	70521375	70543434	6q_26	25427643	25461643	6q_26	6q_26	6q_26	112028.4	1	1
CIGENEomyV6.74749	CIGENEomyV6.82125	97.86	562	12	0	1	562	562	1	562	562	0	1144	24	27	24-27	6656016	6673650	24_27	9395961	9420365	24_27	24_27	24_27	111951.84	1	1
CIGENEomyV6.31939	CIGENEomyV6.55352	95.82	598	24	1	1	598	598	1	597	597	0	1168	9	16	9-16	37647706	37706411	9q_16q	32370133	32494617	9q_16q	9q_16q	9q_16q	111917.76	1	1
CIGENEomyV6.43003	CIGENEomyV6.46334	100	530	0	0	61	590	613	1	530	554	0	1119	12	13	12-13	78300975	78314840	12q_13q	44781502	44788808	12q_13q	12q_13q	12q_13q	111900	0.86	0.96
CIGENEomyV6.43023	CIGENEomyV6.46368	99.64	548	2	0	1	548	548	1	548	548	0	1122	12	13	12-13	78554483	78563524	12q_13q	45135325	45145352	12q_13q	12q_13q	12q_13q	111796.08	1	1
CIGENEomyV6.20279	CIGENEomyV6.38225	97.53	566	14	0	1	566	566	1	566	566	0	1146	6	11	6-11	19717145	19725443	6p_11q	48763072	48780684	6p_11q	6p_11q	6p_11q	111769.38	1	1
CIGENEomyV6.50034	CIGENEomyV6.77758	94.44	647	34	1	1	645	645	1	647	647	0	1182	14	25	14-25	53323790	53342739	14q_25p	26086975	26109102	14q_25p	14q_25p	14q_25p	111628.08	1	1
CIGENEomyV6.42626	CIGENEomyV6.46103	97.89	569	12	0	1	569	569	1	569	569	0	1140	12	13	12-13	71000371	71014114	12q_13q	40649839	40667464	12q_13q	12q_13q	12q_13q	111594.6	1	1
CIGENEomyV6.10094	CIGENEomyV6.71316	97.87	564	12	0	207	770	770	1	564	564	0	1140	3	22	3-22	52435498	52469208	3q_22p	14835035	14846025	3q_22p	3q_22p	3q_22p	111571.8	0.73	1
CIGENEomyV6.31561	CIGENEomyV6.56427	87.39	793	72	11	1	783	783	20	794	794	0	1276	9	16	9-16	28838845	28849306	9q_16q	56149289	56169979	9q_16q	9q_16q	9q_16q	111509.64	1	0.98
CIGENEomyV6.67482	CIGENEomyV6.74093	80.18	913	139	14	1	907	1225	1	877	939	0	1390	20	23	20-23	20891276	20927282	20q_23	38859004	38889417	20q_23	20q_23	20q_23	111450.2	0.73	0.96
CIGENEomyV6.32702	CIGENEomyV6.55629	86.32	782	88	5	1	773	773	1	772	772	0	1291	9	16	9-16	56580724	56614747	9q_16q	38893414	38919977	9q_16q	9q_16q	9q_16q	111439.12	1.01	1.01
CIGENEomyV6.5837	CIGENEomyV6.976	84.78	782	104	4	1	780	780	1	769	769	0	1314	2	1	1-2	50486125	50528356	1p_2q	20960445	21006233	1p_2q	1p_2q	1p_2q	111400.92	1	1.01
CIGENEomyV6.48148	CIGENEomyV6.63198	81.73	865	134	3	1	841	841	1	865	865	0	1363	14	18	14-18	10546509	10551814	14p_18q	49616135	49619945	14p_18q	14p_18q	14p_18q	111397.99	1.02	1
CIGENEomyV6.21529	CIGENEomyV6.80312	97.7	653	15	0	1	653	653	1	653	653	0	1140	6	26	6-26	51844316	51872831	6q_26	6743743	6779825	6q_26	6q_26	6q_26	111378	1	1
CIGENEomyV6.28609	CIGENEomyV6.84802	95.9	585	20	3	3	585	585	2	584	584	0	1161	8	28	8-28	55064611	55067399	8q_28	24396818	24399328	8q_28	8q_28	8q_28	111339.9	0.99	1
CIGENEomyV6.11007	CIGENEomyV6.71594	82.27	829	136	2	213	1030	1030	1	829	829	0	1353	3	22	3-22	73746487	73763689	3q_22q	22613068	22622762	3q_22q	3q_22q	3q_22q	111311.31	0.8	1
CIGENEomyV6.65725	CIGENEomyV6.78705	92.66	640	45	1	1	640	640	1	638	638	0	1201	19	25	19-25	43301594	43317370	19q_25q	54995848	55007079	19q_25q	19q_25q	19q_25q	111284.66	1	1
CIGENEomyV6.14565	CIGENEomyV6.27756	94.44	647	19	2	1	630	630	1	647	647	0	1178	4	8	4-8	73096320	73110748	4q_8p	31147077	31168740	4q_8p	4q_8p	4q_8p	111250.32	1.02	1
CIGENEomyV6.17670	CIGENEomyV6.701	97.23	578	14	1	1	576	576	1	578	578	0	1144	5	1	1-5	56147689	56172421	1p_5q	14912877	14946588	1p_5q	1p_5q	1p_5q	111231.12	1	1
CIGENEomyV6.12410	CIGENEomyV6.5725	87.35	822	88	8	1	814	821	1	814	1050	0	1272	4	2	2-4	12354888	12401596	2q_4p	47595155	47636869	2q_4p	2q_4p	2q_4p	111109.2	0.99	0.78
CIGENEomyV6.50274	CIGENEomyV6.77954	94.47	615	34	0	1	615	615	15	629	629	0	1176	14	25	14-25	58476988	58775018	14q_25p	31621625	32029356	14q_25p	14q_25p	14q_25p	111096.72	1	0.98
CIGENEomyV6.24753	CIGENEomyV6.59889	89.63	704	65	6	1	699	699	1	701	701	0	1239	7	17	7-17	44467722	44485598	7q_17q	53024077	53092430	7q_17q	7q_17q	7q_17q	111051.57	1	1
CIGENEomyV6.65026	CIGENEomyV6.79389	91.07	683	59	2	1	682	682	1	682	682	0	1219	19	25	19-25	27226451	27282620	19q_25q	71510288	71518674	19q_25q	19q_25q	19q_25q	111014.33	1	1
CIGENEomyV6.65406	CIGENEomyV6.79009	91.07	683	56	3	1	682	682	1	679	679	0	1219	19	25	19-25	37052456	37061013	19q_25q	61364799	61371523	19q_25q	19q_25q	19q_25q	111014.33	1	1
CIGENEomyV6.28451	CIGENEomyV6.84938	86.27	772	99	4	27	794	794	1	769	769	0	1285	8	28	8-28	51138775	51155527	8q_28	28205340	28273249	8q_28	8q_28	8q_28	110856.95	0.97	1
CIGENEomyV6.74935	CIGENEomyV6.82313	95.21	584	28	0	1	584	584	1	584	584	0	1164	24	27	24-27	10544222	10548674	24_27	13481217	13484196	24_27	24_27	24_27	110824.44	1	1
CIGENEomyV6.4320	CIGENEomyV6.8807	97.81	549	12	0	1	549	587	31	579	594	0	1133	2	3	2-3	11768839	11784050	2p_3p	20171575	20184205	2p_3p	2p_3p	2p_3p	110818.73	0.94	0.92
CIGENEomyV6.16979	CIGENEomyV6.40409	88.29	803	64	6	1	788	788	1	788	788	0	1255	5	12	5-12	38527898	38540183	5p_12p	13174070	13189494	5p_12p	5p_12p	5p_12p	110803.95	1.01	1.01
CIGENEomyV6.53135	CIGENEomyV6.69371	89.07	732	44	7	1	710	743	34	751	980	0	1244	15	21	15-21	49462457	49467803	15q_21p	19059561	19067199	15q_21p	15q_21p	15q_21p	110803.08	0.98	0.74
CIGENEomyV6.65940	CIGENEomyV6.78490	86.78	764	76	8	1	756	756	505	1251	1251	0	1276	19	25	19-25	48596370	48623615	19q_25q	49747052	49799308	19q_25q	19q_25q	19q_25q	110731.28	1	0.6
CIGENEomyV6.5807	CIGENEomyV6.942	98.01	552	11	0	1	552	552	1	552	552	0	1129	2	1	1-2	49951258	49974705	1p_2q	20480374	20488042	1p_2q	1p_2q	1p_2q	110653.29	1	1
CIGENEomyV6.14515	CIGENEomyV6.27797	84.27	820	80	6	1	773	773	1	818	818	0	1313	4	8	4-8	71811006	71842450	4q_8p	32257636	32317925	4q_8p	4q_8p	4q_8p	110646.51	1.05	1
CIGENEomyV6.4339	CIGENEomyV6.8795	99.81	538	1	0	1	538	538	1	538	538	0	1108	2	3	2-3	11944055	11954984	2p_3p	19989577	20004286	2p_3p	2p_3p	2p_3p	110589.48	1	1
CIGENEomyV6.16566	CIGENEomyV6.86561	86.73	904	81	10	27	918	918	1	877	877	0	1275	5	29	5-29	29431773	29466107	5p_29	22617404	22656118	5p_29	5p_29	5p_29	110580.75	0.97	1.02
CIGENEomyV6.42891	CIGENEomyV6.46210	98.19	553	10	0	1	553	553	1	553	553	0	1126	12	13	12-13	75457581	75487063	12q_13q	42384165	42405475	12q_13q	12q_13q	12q_13q	110561.94	1	1
CIGENEomyV6.49632	CIGENEomyV6.77266	85.35	751	95	8	1	750	750	1	737	737	0	1295	14	25	14-25	45169089	45182181	14q_25p	17240079	17256640	14q_25p	14q_25p	14q_25p	110528.25	0.99	1.01
CIGENEomyV6.16665	CIGENEomyV6.86651	91.23	661	55	1	1	661	661	1	658	658	0	1211	5	29	5-29	32478656	32491039	5p_29	25500238	25517142	5p_29	5p_29	5p_29	110479.53	1	1
CIGENEomyV6.75755	CIGENEomyV6.83081	95.24	609	28	1	1	609	633	1	608	786	0	1160	24	27	24-27	30373145	30433674	24_27	32984954	33025543	24_27	24_27	24_27	110478.4	0.96	0.77
CIGENEomyV6.42728	CIGENEomyV6.45990	95.87	654	19	2	6	652	652	1	653	653	0	1152	12	13	12-13	72633499	72646924	12q_13q	38981857	38995138	12q_13q	12q_13q	12q_13q	110442.24	1	1
CIGENEomyV6.48891	CIGENEomyV6.62569	97.72	570	13	0	1	570	570	1	570	570	0	1129	14	18	14-18	26938188	26959741	14p_18q	34901552	34927968	14p_18q	14p_18q	14p_18q	110325.88	1	1
CIGENEomyV6.75288	CIGENEomyV6.82655	94.05	605	36	0	4	608	608	1	605	605	0	1172	24	27	24-27	18028700	18088237	24_27	21337187	21379863	24_27	24_27	24_27	110226.6	1	1
CIGENEomyV6.74916	CIGENEomyV6.82291	92.84	1047	72	2	1	1046	1046	1	1045	1176	0	1187	24	27	24-27	10221072	10235563	24_27	13145809	13164813	24_27	24_27	24_27	110201.08	1	0.89
CIGENEomyV6.49956	CIGENEomyV6.77673	86.74	739	95	2	1	736	738	32	770	772	0	1270	14	25	14-25	51371864	51397561	14q_25p	24076894	24093152	14q_25p	14q_25p	14q_25p	110159.8	1	0.95
CIGENEomyV6.44956	CIGENEomyV6.58182	93.74	623	35	2	1	623	640	1	619	1141	0	1175	13	17	13-17	17600594	17608008	13p_17p	13218425	13236104	13p_17p	13p_17p	13p_17p	110144.5	0.97	0.54
CIGENEomyV6.44965	CIGENEomyV6.58188	95.43	679	26	2	1	679	679	1	674	674	0	1154	13	17	13-17	17646938	17659248	13p_17p	13271914	13279481	13p_17p	13p_17p	13p_17p	110126.22	1	1
CIGENEomyV6.53563	CIGENEomyV6.68906	95.71	630	27	0	1	630	638	6	635	636	0	1150	15	21	15-21	57040254	57059873	15q_21p	10989844	11005790	15q_21p	15q_21p	15q_21p	110066.5	0.99	0.99
CIGENEomyV6.74987	CIGENEomyV6.82354	87.61	702	66	3	562	1245	1245	399	1097	1097	0	1256	24	27	24-27	11504143	11561834	24_27	14483892	14526100	24_27	24_27	24_27	110038.16	0.56	0.64
CIGENEomyV6.21010	CIGENEomyV6.38993	99.1	553	5	0	1	553	553	1	553	553	0	1110	6	11	6-11	36780107	36796762	6p_11q	66568600	66583119	6p_11q	6p_11q	6p_11q	110001	1	1
CIGENEomyV6.43081	CIGENEomyV6.46433	98.89	540	6	0	296	835	835	20	559	559	0	1112	12	13	12-13	79312099	79342637	12q_13q	45874783	45886560	12q_13q	12q_13q	12q_13q	109965.68	0.65	0.97
CIGENEomyV6.20644	CIGENEomyV6.38578	88.45	710	50	3	136	813	826	187	896	898	0	1243	6	11	6-11	28447728	28479208	6p_11q	57615403	57641141	6p_11q	6p_11q	6p_11q	109943.35	0.86	0.79
CIGENEomyV6.71425	CIGENEomyV6.9999	97.35	565	15	0	1	565	565	1	565	565	0	1129	22	3	3-22	17417264	17444512	3q_22p	49946676	49978713	3q_22p	3q_22p	3q_22p	109908.15	1	1
CIGENEomyV6.3934	CIGENEomyV6.8526	94.22	744	34	5	1	739	739	69	808	808	0	1166	2	3	2-3	5814817	5826417	2p_3p	15099765	15113273	2p_3p	2p_3p	2p_3p	109860.52	1	0.91
CIGENEomyV6.32531	CIGENEomyV6.55804	96.35	602	22	0	1	602	604	1	602	603	0	1140	9	16	9-16	52230010	52242162	9q_16q	42662772	42682080	9q_16q	9q_16q	9q_16q	109839	1	1
CIGENEomyV6.74959	CIGENEomyV6.82345	86.62	770	77	3	683	1452	1486	1	744	749	0	1268	24	27	24-27	11170251	11233110	24_27	14187140	14278384	24_27	24_27	24_27	109834.16	0.52	1.02
CIGENEomyV6.12845	CIGENEomyV6.18200	96	575	21	1	1	573	573	1	575	575	0	1144	4	5	4-5	24203772	24215735	4p_5q	69455445	69468439	4p_5q	4p_5q	4p_5q	109824	1	1
CIGENEomyV6.32338	CIGENEomyV6.55983	83.51	855	104	5	49	871	881	1	850	884	0	1315	9	16	9-16	48591945	48693536	9q_16q	45915163	45975820	9q_16q	9q_16q	9q_16q	109815.65	0.96	0.96
CIGENEomyV6.42824	CIGENEomyV6.45894	98.91	549	6	0	1	549	549	1	549	549	0	1110	12	13	12-13	74257963	74269511	12q_13q	37416907	37428713	12q_13q	12q_13q	12q_13q	109790.1	1	1
CIGENEomyV6.37207	CIGENEomyV6.51566	99.08	542	5	0	1	542	542	1	542	542	0	1108	11	15	11-15	17124395	17131448	11p_15p	7346344	7354921	11p_15p	11p_15p	11p_15p	109780.64	1	1
CIGENEomyV6.34759	CIGENEomyV6.40875	84.38	781	100	7	1	777	777	67	829	829	0	1301	10	12	10-12	33234651	33241212	10p_12p	23897963	23910989	10p_12p	10p_12p	10p_12p	109778.38	1	0.93
CIGENEomyV6.32041	CIGENEomyV6.55282	92.22	630	39	2	1	628	628	1	622	622	0	1190	9	16	9-16	40411170	40421960	9q_16q	30628371	30648690	9q_16q	9q_16q	9q_16q	109741.8	1	1.01
CIGENEomyV6.24827	CIGENEomyV6.59813	97.31	557	15	0	68	624	624	1	557	557	0	1127	7	17	7-17	46567344	46583708	7q_17q	50975564	51003499	7q_17q	7q_17q	7q_17q	109668.37	0.89	1
CIGENEomyV6.28867	CIGENEomyV6.84619	89.81	667	65	2	52	715	715	1	667	752	0	1221	8	28	8-28	61598010	61619654	8q_28	18731233	18742475	8q_28	8q_28	8q_28	109658.01	0.93	0.88
CIGENEomyV6.28849	CIGENEomyV6.84637	92.93	679	44	3	1	675	675	1	679	679	0	1180	8	28	8-28	61133109	61162280	8q_28	19168025	19187215	8q_28	8q_28	8q_28	109657.4	1	1
CIGENEomyV6.5009	CIGENEomyV6.9596	90.24	902	64	5	59	951	951	1	887	887	0	1215	2	3	2-3	26844935	26924142	2p_3p	36802019	36863493	2p_3p	2p_3p	2p_3p	109641.6	0.94	1.01
CIGENEomyV6.4379	CIGENEomyV6.8912	95.16	620	27	1	1	617	617	1	620	620	0	1152	2	3	2-3	13239152	13255158	2p_3p	22991521	23006750	2p_3p	2p_3p	2p_3p	109624.32	1	1
CIGENEomyV6.67934	CIGENEomyV6.73752	94.95	594	27	1	1	594	596	1	591	698	0	1154	20	23	20-23	32627088	32644581	20q_23	29561468	29602197	20q_23	20q_23	20q_23	109572.3	0.99	0.85
CIGENEomyV6.2562	CIGENEomyV6.73069	97.98	545	11	0	1	545	545	1	545	545	0	1118	1	23	1-23	63696644	64016904	1q_23	8092081	8139890	1q_23	1q_23	1q_23	109541.64	1	1
CIGENEomyV6.24752	CIGENEomyV6.59890	90.06	684	41	1	45	701	703	1	684	711	0	1216	7	17	7-17	44311927	44479706	7q_17q	53087810	53223713	7q_17q	7q_17q	7q_17q	109512.96	0.97	0.96
CIGENEomyV6.67743	CIGENEomyV6.74400	83.96	792	77	4	1	791	791	1	743	743	0	1304	20	23	20-23	27559922	27585422	20q_23	46583318	46631696	20q_23	20q_23	20q_23	109483.84	1	1.06
CIGENEomyV6.13317	CIGENEomyV6.18982	87.37	744	83	2	307	1050	1050	3	735	735	0	1253	4	5	4-5	39783375	39808900	4p_5q	86410107	86427978	4p_5q	4p_5q	4p_5q	109474.61	0.71	1.01
CIGENEomyV6.12704	CIGENEomyV6.18046	92.13	635	19	4	1	604	1193	1	635	648	0	1187	4	5	4-5	19970977	20007217	4p_5q	65355723	65386766	4p_5q	4p_5q	4p_5q	109358.31	0.53	0.97
CIGENEomyV6.20431	CIGENEomyV6.38358	95.88	582	24	0	1	582	582	1	582	582	0	1140	6	11	6-11	23234439	23263858	6p_11q	52239117	52258686	6p_11q	6p_11q	6p_11q	109303.2	1	1
CIGENEomyV6.34567	CIGENEomyV6.41125	86.2	739	78	6	1	724	727	1	730	734	0	1268	10	12	10-12	28667557	28805839	10p_12p	28458790	28610422	10p_12p	10p_12p	10p_12p	109301.6	1.01	1
CIGENEomyV6.2688	CIGENEomyV6.73192	92.3	662	50	1	1	661	661	1	662	662	0	1184	1	23	1-23	66954395	67044187	1q_23	11496789	11655872	1q_23	1q_23	1q_23	109283.2	1	1
CIGENEomyV6.16379	CIGENEomyV6.86372	92.42	620	43	2	13	632	632	1	616	616	0	1182	5	29	5-29	23730004	23828119	5p_29	16376649	16457342	5p_29	5p_29	5p_29	109240.44	0.98	1
CIGENEomyV6.31639	CIGENEomyV6.56338	81.64	855	150	4	1	854	855	1	849	857	0	1338	9	16	9-16	30755320	30803689	9q_16q	54346559	54382223	9q_16q	9q_16q	9q_16q	109234.32	1	0.99
CIGENEomyV6.42483	CIGENEomyV6.45794	97.7	566	13	0	1	566	1098	1	566	1095	0	1118	12	13	12-13	67999123	68024087	12q_13q	35128378	35156508	12q_13q	12q_13q	12q_13q	109228.6	0.52	0.52
CIGENEomyV6.34774	CIGENEomyV6.40850	97.59	580	14	0	1	580	580	1	580	580	0	1119	10	12	10-12	33896348	33936836	10p_12p	23249056	23272190	10p_12p	10p_12p	10p_12p	109203.21	1	1
CIGENEomyV6.14848	CIGENEomyV6.26706	95.45	572	26	0	32	603	603	1	572	572	0	1144	4	8	4-8	79269316	79282079	4q_8p	5554404	5565591	4q_8p	4q_8p	4q_8p	109194.8	0.95	1
CIGENEomyV6.53029	CIGENEomyV6.69464	90.54	666	54	3	17	673	679	131	796	836	0	1206	15	21	15-21	46812522	46831442	15q_21p	21550582	21592034	15q_21p	15q_21p	15q_21p	109191.24	0.98	0.79
CIGENEomyV6.16520	CIGENEomyV6.86508	85.18	830	82	5	112	940	940	1	790	790	0	1281	5	29	5-29	27432938	27472128	5p_29	20497095	20528533	5p_29	5p_29	5p_29	109115.58	0.88	1.04
CIGENEomyV6.42953	CIGENEomyV6.46914	98.92	554	6	0	211	764	859	1	554	554	0	1103	12	13	12-13	77170417	77189296	12q_13q	54953868	54957218	12q_13q	12q_13q	12q_13q	109108.76	0.64	1
CIGENEomyV6.35276	CIGENEomyV6.87159	84.44	765	87	5	130	894	894	10	742	742	0	1292	10	29	10-29	44683803	44711707	10p_29	34152819	34194496	10p_29	10p_29	10p_29	109096.48	0.85	1.02
CIGENEomyV6.14197	CIGENEomyV6.27459	94.94	613	22	3	1	609	609	1	608	608	0	1149	4	8	4-8	64397318	64414410	4q_8p	22746807	22764313	4q_8p	4q_8p	4q_8p	109086.06	1	1
CIGENEomyV6.52915	CIGENEomyV6.69582	91.5	635	47	2	10	637	867	3	637	639	0	1192	15	21	15-21	44031653	44054504	15q_21p	24162292	24182877	15q_21p	15q_21p	15q_21p	109068	0.73	0.99
CIGENEomyV6.14451	CIGENEomyV6.27858	87.39	714	63	2	629	1315	1403	1	714	714	0	1248	4	8	4-8	69651999	69762187	4q_8p	34195599	34218277	4q_8p	4q_8p	4q_8p	109062.72	0.51	1
CIGENEomyV6.36043	CIGENEomyV6.64250	94.4	697	22	5	1	689	699	1	688	787	0	1155	10	19	10-19	63932299	63970586	10q_19p	8266316	8305087	10q_19p	10q_19p	10q_19p	109032	0.99	0.88
CIGENEomyV6.49931	CIGENEomyV6.77635	91.14	632	53	2	1	630	705	1	631	692	0	1196	14	25	14-25	51021270	51034181	14q_25p	23645342	23656786	14q_25p	14q_25p	14q_25p	109003.44	0.89	0.91
CIGENEomyV6.68197	CIGENEomyV6.73932	95.53	582	25	1	1	581	581	1	582	656	0	1141	20	23	20-23	38529518	38533913	20q_23	35589107	35604812	20q_23	20q_23	20q_23	108999.73	1	0.89
CIGENEomyV6.12695	CIGENEomyV6.18033	89.26	680	50	5	1	675	675	1	662	662	0	1220	4	5	4-5	19714661	19805337	4p_5q	65032597	65118081	4p_5q	4p_5q	4p_5q	108897.2	1	1.02
CIGENEomyV6.3861	CIGENEomyV6.8415	99.81	533	1	0	1	533	533	1	533	533	0	1091	2	3	2-3	4877223	4881769	2p_3p	13828400	13836647	2p_3p	2p_3p	2p_3p	108892.71	1	1
CIGENEomyV6.23385	CIGENEomyV6.61528	98.87	533	6	0	43	575	575	1	533	533	0	1101	7	18	7-18	7015194	7030243	7p_18p	10323340	10336306	7p_18p	7p_18p	7p_18p	108855.87	0.93	1
CIGENEomyV6.34254	CIGENEomyV6.41483	82.46	901	129	12	1	881	881	1	892	892	0	1320	10	12	10-12	17533525	17581966	10p_12p	40348939	40370230	10p_12p	10p_12p	10p_12p	108847.2	1.01	1
CIGENEomyV6.4722	CIGENEomyV6.9290	95.06	627	25	2	589	1211	1211	4	628	628	0	1145	2	3	2-3	19816372	19834567	2p_3p	29770325	29777376	2p_3p	2p_3p	2p_3p	108843.7	0.52	1
CIGENEomyV6.14007	CIGENEomyV6.27276	86.43	715	85	5	1	710	710	1	708	708	0	1259	4	8	4-8	60209609	60248509	4q_8p	18433007	18480769	4q_8p	4q_8p	4q_8p	108815.37	1	1
CIGENEomyV6.67963	CIGENEomyV6.73775	88.16	701	56	3	1	701	707	1	674	675	0	1234	20	23	20-23	33098687	33134030	20q_23	30007984	30046084	20q_23	20q_23	20q_23	108789.44	0.99	1.03
CIGENEomyV6.67920	CIGENEomyV6.73742	86.96	759	75	7	30	777	777	1	746	746	0	1251	20	23	20-23	32442448	32453430	20q_23	29308289	29331489	20q_23	20q_23	20q_23	108786.96	0.97	1.01
CIGENEomyV6.50018	CIGENEomyV6.77742	90.14	700	64	2	1	695	695	1	700	700	0	1206	14	25	14-25	53041544	53059301	14q_25p	25737541	25761283	14q_25p	14q_25p	14q_25p	108708.84	1	1
CIGENEomyV6.34466	CIGENEomyV6.41262	96.37	578	19	1	1	576	576	1	578	578	0	1128	10	12	10-12	24627599	24675013	10p_12p	32643445	32706664	10p_12p	10p_12p	10p_12p	108705.36	1	1
CIGENEomyV6.13940	CIGENEomyV6.27190	91.03	613	55	0	25	637	661	2	614	617	0	1194	4	8	4-8	57870929	57900609	4q_8p	16045628	16061710	4q_8p	4q_8p	4q_8p	108689.82	0.93	0.99
CIGENEomyV6.32556	CIGENEomyV6.55782	92.18	614	48	0	1	614	622	121	734	745	0	1179	9	16	9-16	52671206	52684929	9q_16q	42265043	42296649	9q_16q	9q_16q	9q_16q	108680.22	0.99	0.82
CIGENEomyV6.5829	CIGENEomyV6.965	96.86	606	14	1	1	606	606	1	601	601	0	1122	2	1	1-2	50280734	50290938	1p_2q	20832694	20850861	1p_2q	1p_2q	1p_2q	108676.92	1	1.01
CIGENEomyV6.37446	CIGENEomyV6.52553	90.44	659	50	4	413	1059	1061	23	680	1103	0	1201	11	15	11-15	24833999	24991746	11p_15p	32884552	32933810	11p_15p	11p_15p	11p_15p	108618.44	0.62	0.59
CIGENEomyV6.4293	CIGENEomyV6.8833	98.7	537	7	0	307	843	877	1	537	538	0	1100	2	3	2-3	10872004	10958174	2p_3p	21057715	21076141	2p_3p	2p_3p	2p_3p	108570	0.61	1
CIGENEomyV6.10034	CIGENEomyV6.71386	90.38	676	56	2	16	691	691	1	667	667	0	1201	3	22	3-22	51363624	51396776	3q_22p	16054624	16056843	3q_22p	3q_22p	3q_22p	108546.38	0.98	1.01
CIGENEomyV6.13628	CIGENEomyV6.26787	87.57	700	75	4	71	759	759	1	699	699	0	1239	4	8	4-8	48790871	48817125	4q_8p	7367899	7377132	4q_8p	4q_8p	4q_8p	108499.23	0.92	1
CIGENEomyV6.32450	CIGENEomyV6.55895	94.71	586	31	0	15	600	610	34	619	649	0	1145	9	16	9-16	51070765	51086919	9q_16q	43743892	43756326	9q_16q	9q_16q	9q_16q	108442.95	0.96	0.9
CIGENEomyV6.75283	CIGENEomyV6.82651	94.41	608	34	0	1	608	608	1	608	608	0	1148	24	27	24-27	17954444	17965939	24_27	21241311	21262655	24_27	24_27	24_27	108382.68	1	1
CIGENEomyV6.20611	CIGENEomyV6.38545	94.81	597	30	1	1	597	598	1	596	666	0	1143	6	11	6-11	27788663	27824018	6p_11q	56884553	56917150	6p_11q	6p_11q	6p_11q	108367.83	1	0.89
CIGENEomyV6.4466	CIGENEomyV6.9029	89.24	846	76	4	1	846	846	1	831	831	0	1214	2	3	2-3	15078402	15101162	2p_3p	24620156	24806548	2p_3p	2p_3p	2p_3p	108337.36	1	1.01
CIGENEomyV6.34344	CIGENEomyV6.41391	95.04	585	29	0	1	585	585	1	585	585	0	1139	10	12	10-12	21985706	21989074	10p_12p	35698829	35701806	10p_12p	10p_12p	10p_12p	108250.56	1	1
CIGENEomyV6.34523	CIGENEomyV6.41194	91.97	635	47	2	1	634	634	1	632	632	0	1177	10	12	10-12	26800172	26822290	10p_12p	30108002	30336599	10p_12p	10p_12p	10p_12p	108248.69	1	1
CIGENEomyV6.24361	CIGENEomyV6.60351	84.36	761	109	3	1	751	751	1	761	761	0	1283	7	17	7-17	31536875	31762579	7q_17q	66154797	66167166	7q_17q	7q_17q	7q_17q	108233.88	1.01	1
CIGENEomyV6.33951	CIGENEomyV6.41678	89.87	701	37	3	1	667	917	1	701	827	0	1204	10	12	10-12	8845821	8906630	10p_12p	47986710	48066206	10p_12p	10p_12p	10p_12p	108203.48	0.76	0.84
CIGENEomyV6.12853	CIGENEomyV6.18213	88.76	694	65	6	1	682	682	1	693	693	0	1219	4	5	4-5	24304666	24321432	4p_5q	69577131	69595911	4p_5q	4p_5q	4p_5q	108198.44	1.01	0.99
CIGENEomyV6.50331	CIGENEomyV6.78032	90.38	634	61	0	6	639	639	230	863	863	0	1197	14	25	14-25	61156151	61197240	14q_25p	34749500	34876882	14q_25p	14q_25p	14q_25p	108184.86	0.99	0.73
CIGENEomyV6.10286	CIGENEomyV6.72181	96.92	584	18	0	1	584	584	8	591	591	0	1116	3	22	3-22	58166393	58214437	3q_22q	37931002	37936452	3q_22q	3q_22q	3q_22q	108162.72	1	0.99
CIGENEomyV6.20346	CIGENEomyV6.38280	93.27	654	41	1	1	651	651	1	654	654	0	1159	6	11	6-11	20838407	20897413	6p_11q	49809440	49882517	6p_11q	6p_11q	6p_11q	108099.93	1	1
CIGENEomyV6.32866	CIGENEomyV6.55493	91.53	626	52	1	1	626	626	1	625	625	0	1181	9	16	9-16	59351100	59583570	9q_16q	36309007	36326961	9q_16q	9q_16q	9q_16q	108096.93	1	1
CIGENEomyV6.22273	CIGENEomyV6.81068	94.38	623	29	4	10	629	629	10	629	629	0	1145	6	26	6-26	70615305	70635255	6q_26	25534366	25548327	6q_26	6q_26	6q_26	108065.1	0.98	0.98
CIGENEomyV6.22130	CIGENEomyV6.80928	94.71	605	12	1	1	585	607	1	605	657	0	1141	6	26	6-26	66922245	66958941	6q_26	21971147	22010393	6q_26	6q_26	6q_26	108064.11	1	0.92
CIGENEomyV6.54823	CIGENEomyV6.66786	96.81	564	16	1	1	562	562	1	564	564	0	1116	16	20	16-20	17905834	17953858	16p_20p	5152206	5237392	16p_20p	16p_20p	16p_20p	108039.96	1	1
CIGENEomyV6.28435	CIGENEomyV6.84954	91.45	608	52	0	1	608	608	1	608	608	0	1181	8	28	8-28	50818204	50822994	8q_28	28539695	28546455	8q_28	8q_28	8q_28	108002.45	1	1
CIGENEomyV6.24690	CIGENEomyV6.59949	92.86	602	40	2	1	599	599	1	602	602	0	1163	7	17	7-17	41652089	41658022	7q_17q	55765665	55773044	7q_17q	7q_17q	7q_17q	107996.18	1	1
CIGENEomyV6.53039	CIGENEomyV6.69454	95.97	571	6	1	1	571	576	355	908	924	0	1125	15	21	15-21	46985201	47244092	15q_21p	21201919	21414822	15q_21p	15q_21p	15q_21p	107966.25	0.99	0.62
CIGENEomyV6.35054	CIGENEomyV6.86871	88.82	644	72	0	1	644	644	44	687	687	0	1215	10	29	10-29	41121248	41143949	10p_29	29800289	29820058	10p_29	10p_29	10p_29	107916.3	1	0.94
CIGENEomyV6.14569	CIGENEomyV6.27753	95.84	577	20	2	1	573	573	1	577	577	0	1126	4	8	4-8	73129759	73173636	4q_8p	31083935	31126807	4q_8p	4q_8p	4q_8p	107915.84	1	1
CIGENEomyV6.1347	CIGENEomyV6.6149	89.47	684	62	2	5	678	678	1	684	684	0	1206	1	2	1-2	30505024	30510709	1p_2q	59820416	59825936	1p_2q	1p_2q	1p_2q	107900.82	1.01	1
CIGENEomyV6.2065	CIGENEomyV6.6925	92.3	623	32	2	1	607	607	1	623	623	0	1169	1	2	1-2	49873530	49899039	1p_2q	79090832	79115664	1p_2q	1p_2q	1p_2q	107898.7	1.02	1
CIGENEomyV6.25103	CIGENEomyV6.59500	94.97	616	28	1	1	613	613	491	1106	1106	0	1136	7	17	7-17	52921404	52961052	7q_17q	44775604	44894951	7q_17q	7q_17q	7q_17q	107885.92	1	0.56
CIGENEomyV6.22039	CIGENEomyV6.80844	95.97	595	24	0	1	595	631	1	595	802	0	1124	6	26	6-26	64746293	64770264	6q_26	19929154	19961080	6q_26	6q_26	6q_26	107870.28	0.94	0.74
CIGENEomyV6.71461	CIGENEomyV6.9955	83.94	741	106	1	1	728	740	1	741	767	0	1285	22	3	3-22	18884253	18924957	3q_22p	48565440	48600363	3q_22p	3q_22p	3q_22p	107862.9	1	0.96
CIGENEomyV6.33895	CIGENEomyV6.41718	84.63	761	98	5	9	759	759	3	754	754	0	1274	10	12	10-12	7397415	7511431	10p_12p	49562954	49658316	10p_12p	10p_12p	10p_12p	107818.62	1	1
CIGENEomyV6.12910	CIGENEomyV6.18263	81.74	953	108	8	1	933	933	1	907	907	0	1319	4	5	4-5	25513955	25581876	4p_5q	70799404	70849331	4p_5q	4p_5q	4p_5q	107815.06	1.01	1.04
CIGENEomyV6.12531	CIGENEomyV6.17892	94.17	635	30	2	128	756	756	1	634	634	0	1144	4	5	4-5	15237299	15310345	4p_5q	60787452	60815198	4p_5q	4p_5q	4p_5q	107730.48	0.84	1
CIGENEomyV6.1368	CIGENEomyV6.6158	92.89	619	15	2	1	590	596	1	619	694	0	1159	1	2	1-2	30769276	30788026	1p_2q	60090146	60112883	1p_2q	1p_2q	1p_2q	107659.51	1.04	0.89
CIGENEomyV6.67773	CIGENEomyV6.74449	94.5	582	32	0	1	582	734	1	582	600	0	1139	20	23	20-23	28297117	28494618	20q_23	47960547	48192091	20q_23	20q_23	20q_23	107635.5	0.79	0.97
CIGENEomyV6.22223	CIGENEomyV6.81011	93.26	608	37	3	1	604	604	7	614	614	0	1154	6	26	6-26	69452884	69458167	6q_26	24352070	24358637	6q_26	6q_26	6q_26	107622.04	1	0.99
CIGENEomyV6.21666	CIGENEomyV6.80420	96.23	557	21	0	1	557	557	1	557	557	0	1118	6	26	6-26	55980014	55998267	6q_26	10063522	10074051	6q_26	6q_26	6q_26	107585.14	1	1
CIGENEomyV6.36765	CIGENEomyV6.52044	84.82	784	64	5	1	782	782	18	748	1004	0	1268	11	15	11-15	8147788	8193177	11p_15p	16149036	16232064	11p_15p	11p_15p	11p_15p	107551.76	1	0.78
CIGENEomyV6.31731	CIGENEomyV6.56258	95.53	559	25	0	5	563	563	71	629	629	0	1125	9	16	9-16	33039333	33055710	9q_16q	52026187	52053776	9q_16q	9q_16q	9q_16q	107471.25	0.99	0.89
CIGENEomyV6.53493	CIGENEomyV6.68979	97.69	562	13	0	1	562	562	1	562	562	0	1100	15	21	15-21	56170325	56182099	15q_21p	11943572	11962575	15q_21p	15q_21p	15q_21p	107459	1	1
CIGENEomyV6.65356	CIGENEomyV6.79031	96.35	602	21	1	1	602	644	1	601	605	0	1115	19	25	19-25	36134451	36176335	19q_25q	62178304	62214977	19q_25q	19q_25q	19q_25q	107430.25	0.93	0.99
CIGENEomyV6.54762	CIGENEomyV6.66730	96.24	559	13	2	1	555	555	1	555	555	0	1116	16	20	16-20	16508781	16522445	16p_20p	3700933	3732036	16p_20p	16p_20p	16p_20p	107403.84	1	1
CIGENEomyV6.48378	CIGENEomyV6.63408	94.37	622	28	3	100	721	842	1	615	622	0	1138	14	18	14-18	15131895	15205424	14p_18q	54146765	54165133	14p_18q	14p_18q	14p_18q	107393.06	0.74	1
CIGENEomyV6.45402	CIGENEomyV6.58553	94.86	584	27	1	2	582	591	4	587	596	0	1132	13	17	13-17	27341129	27362942	13p_17p	20295382	20320355	13p_17p	13p_17p	13p_17p	107381.52	0.99	0.98
CIGENEomyV6.23588	CIGENEomyV6.61667	94.4	589	29	2	1	587	594	1	587	588	0	1137	7	18	7-18	10411091	10418234	7p_18p	12535695	12542381	7p_18p	7p_18p	7p_18p	107332.8	0.99	1
CIGENEomyV6.13349	CIGENEomyV6.42090	99.42	520	3	0	48	567	611	1	520	637	0	1079	4	12	4-12	40539657	40694526	4p_12q	58908006	59010682	4p_12q	4p_12q	4p_12q	107274.18	0.85	0.82
CIGENEomyV6.3741	CIGENEomyV6.8202	98.87	529	6	0	1	529	529	1	529	529	0	1085	2	3	2-3	3481483	3490663	2p_3p	11328396	11339505	2p_3p	2p_3p	2p_3p	107273.95	1	1
CIGENEomyV6.20255	CIGENEomyV6.38207	84.44	784	120	1	64	845	845	41	824	824	0	1270	6	11	6-11	19395672	19425047	6p_11q	48475084	48542768	6p_11q	6p_11q	6p_11q	107238.8	0.93	0.95
CIGENEomyV6.50121	CIGENEomyV6.77840	93.63	597	35	2	1	594	594	1	597	901	0	1145	14	25	14-25	55430016	55471655	14q_25p	28267924	28301760	14q_25p	14q_25p	14q_25p	107206.35	1	0.66
CIGENEomyV6.50162	CIGENEomyV6.77865	100	514	0	0	1	514	514	1	514	514	0	1072	14	25	14-25	56086523	56091277	14q_25p	28871488	28884230	14q_25p	14q_25p	14q_25p	107200	1	1
CIGENEomyV6.4377	CIGENEomyV6.8909	98	550	11	0	134	683	890	1	550	551	0	1093	2	3	2-3	13088500	13224729	2p_3p	22846455	22926786	2p_3p	2p_3p	2p_3p	107114	0.62	1
CIGENEomyV6.34336	CIGENEomyV6.41401	86.74	777	82	6	4	775	802	581	1341	1342	0	1234	10	12	10-12	21871382	21900426	10p_12p	35772020	35792011	10p_12p	10p_12p	10p_12p	107037.16	0.96	0.57
CIGENEomyV6.23626	CIGENEomyV6.61647	97.72	702	10	2	1	696	1326	1	702	716	0	1095	7	18	7-18	10923006	10982484	7p_18p	12128552	12790493	7p_18p	7p_18p	7p_18p	107003.4	0.53	0.98
CIGENEomyV6.43136	CIGENEomyV6.46481	99.23	520	4	0	1	520	520	1	520	520	0	1078	12	13	12-13	80170615	80381243	12q_13q	46619928	47035914	12q_13q	12q_13q	12q_13q	106969.94	1	1
CIGENEomyV6.31862	CIGENEomyV6.56161	82.58	953	118	14	15	946	946	1	926	926	0	1295	9	16	9-16	35402684	35425757	9q_16q	49790156	49801243	9q_16q	9q_16q	9q_16q	106941.1	0.99	1.01
CIGENEomyV6.16968	CIGENEomyV6.40426	98.14	537	10	0	542	1078	1078	2	538	538	0	1089	5	12	5-12	38318415	38364672	5p_12p	13418028	13429038	5p_12p	5p_12p	5p_12p	106874.46	0.5	1
CIGENEomyV6.21819	CIGENEomyV6.80616	98.5	533	8	0	106	638	638	1	533	533	0	1085	6	26	6-26	60321778	60345499	6q_26	15205847	15224673	6q_26	6q_26	6q_26	106872.5	0.84	1
CIGENEomyV6.14637	CIGENEomyV6.27706	91.42	676	54	1	1	676	676	1	672	672	0	1169	4	8	4-8	74385471	74398195	4q_8p	29833776	29867255	4q_8p	4q_8p	4q_8p	106869.98	1	1
CIGENEomyV6.14689	CIGENEomyV6.27667	92.18	614	43	2	1	610	610	1	613	613	0	1159	4	8	4-8	75369470	75387379	4q_8p	28968803	29020692	4q_8p	4q_8p	4q_8p	106836.62	1	1
CIGENEomyV6.25526	CIGENEomyV6.59081	87.19	835	53	9	1	787	787	1	829	829	0	1225	7	17	7-17	62713862	62727516	7q_17q	34696509	34739208	7q_17q	7q_17q	7q_17q	106807.75	1.05	1
CIGENEomyV6.12343	CIGENEomyV6.5663	84.49	748	108	6	1	746	762	1	742	745	0	1264	4	2	2-4	10720365	10803706	2q_4p	45965863	45983371	2q_4p	2q_4p	2q_4p	106795.36	0.97	1
CIGENEomyV6.20380	CIGENEomyV6.38304	94.37	586	26	1	11	589	589	1	586	586	0	1131	6	11	6-11	21616844	21623873	6p_11q	50513239	50527059	6p_11q	6p_11q	6p_11q	106732.47	0.99	1
CIGENEomyV6.45373	CIGENEomyV6.58511	99.61	513	2	0	1	513	784	1	513	515	0	1071	13	17	13-17	26585840	26683038	13p_17p	19412575	19497089	13p_17p	13p_17p	13p_17p	106682.31	0.65	1
CIGENEomyV6.21981	CIGENEomyV6.80786	90.87	701	53	4	10	710	710	1	690	690	0	1174	6	26	6-26	63893052	63907809	6q_26	19116362	19129500	6q_26	6q_26	6q_26	106681.38	0.98	1.01
CIGENEomyV6.43152	CIGENEomyV6.46497	99.04	521	5	0	1	521	521	1	521	521	0	1077	12	13	12-13	80564486	80572587	12q_13q	47155189	47165242	12q_13q	12q_13q	12q_13q	106666.08	1	1
CIGENEomyV6.4395	CIGENEomyV6.8930	96.88	545	17	0	1	545	545	1	545	545	0	1101	2	3	2-3	13430221	13451166	2p_3p	23181768	23209806	2p_3p	2p_3p	2p_3p	106664.88	1	1
CIGENEomyV6.67603	CIGENEomyV6.74236	90.45	796	52	6	25	803	803	144	932	932	0	1179	20	23	20-23	23857879	23868432	20q_23	42494286	42534550	20q_23	20q_23	20q_23	106640.55	0.98	0.85
CIGENEomyV6.42920	CIGENEomyV6.46249	97.16	634	16	1	1	634	634	411	1042	1042	0	1097	12	13	12-13	76094212	76102686	12q_13q	43045501	43061598	12q_13q	12q_13q	12q_13q	106584.52	1	0.61
CIGENEomyV6.29502	CIGENEomyV6.84042	99.05	525	5	0	1	525	525	79	603	603	0	1076	8	28	8-28	74228699	74240763	8q_28	4110078	4130009	8q_28	8q_28	8q_28	106577.8	1	0.87
CIGENEomyV6.45131	CIGENEomyV6.58383	99.25	535	4	0	1	535	535	5	539	539	0	1073	13	17	13-17	21273996	21443147	13p_17p	17010381	17017681	13p_17p	13p_17p	13p_17p	106495.25	1	0.99
CIGENEomyV6.12741	CIGENEomyV6.18094	98.3	528	9	0	1	528	528	1	528	528	0	1082	4	5	4-5	21734855	21778380	4p_5q	67032605	67067535	4p_5q	4p_5q	4p_5q	106360.6	1	1
CIGENEomyV6.35212	CIGENEomyV6.87070	91.88	616	44	1	1	616	1108	1	610	610	0	1157	10	29	10-29	43272892	43674350	10p_29	32531876	32663328	10p_29	10p_29	10p_29	106305.16	0.56	1.01
CIGENEomyV6.14507	CIGENEomyV6.27804	84.42	815	102	10	1	810	886	69	863	863	0	1259	4	8	4-8	71468434	71530519	4q_8p	32412883	32444401	4q_8p	4q_8p	4q_8p	106284.78	0.91	0.93
CIGENEomyV6.11186	CIGENEomyV6.71123	88.24	748	36	5	1	698	698	1	746	746	0	1204	3	22	3-22	76432213	76463883	3q_22p	9040355	9063589	3q_22p	3q_22p	3q_22p	106240.96	1.06	1
CIGENEomyV6.32624	CIGENEomyV6.55704	91.48	622	27	3	124	723	723	21	638	638	0	1160	9	16	9-16	54858600	54895871	9q_16q	40355857	40376753	9q_16q	9q_16q	9q_16q	106116.8	0.86	0.97
CIGENEomyV6.23383	CIGENEomyV6.61525	99.81	522	1	0	1	522	522	1	522	522	0	1063	7	18	7-18	6994423	7014644	7p_18p	10300335	10317571	7p_18p	7p_18p	7p_18p	106098.03	1	1
CIGENEomyV6.13224	CIGENEomyV6.18780	92.5	613	38	2	299	903	1131	145	757	765	0	1147	4	5	4-5	36564108	36604792	4p_5q	82531250	82538613	4p_5q	4p_5q	4p_5q	106097.5	0.54	0.8
CIGENEomyV6.75058	CIGENEomyV6.82421	99.62	522	2	0	1	522	522	1	522	522	0	1065	24	27	24-27	12988007	13001478	24_27	16020230	16034282	24_27	24_27	24_27	106095.3	1	1
CIGENEomyV6.75203	CIGENEomyV6.82571	99.06	532	5	0	1	532	532	1	532	532	0	1071	24	27	24-27	16446980	16466254	24_27	19604069	19617274	24_27	24_27	24_27	106093.26	1	1
CIGENEomyV6.12993	CIGENEomyV6.18370	80.92	938	142	12	558	1477	1657	1	919	921	0	1311	4	5	4-5	28441815	28485390	4p_5q	73395383	73411393	4p_5q	4p_5q	4p_5q	106086.12	0.56	1.01
CIGENEomyV6.24952	CIGENEomyV6.59677	97.47	554	14	0	1	554	554	1	554	554	0	1088	7	17	7-17	49930081	50020473	7q_17q	48022738	48089715	7q_17q	7q_17q	7q_17q	106047.36	1	1
CIGENEomyV6.12672	CIGENEomyV6.18015	97.37	533	14	0	1	533	533	1	533	533	0	1089	4	5	4-5	18755521	18782682	4p_5q	64180163	64189818	4p_5q	4p_5q	4p_5q	106035.93	1	1
CIGENEomyV6.44872	CIGENEomyV6.58108	92.76	663	36	2	3	659	659	619	1275	1275	0	1143	13	17	13-17	16231731	16293864	13p_17p	11975791	12086807	13p_17p	13p_17p	13p_17p	106024.68	1	0.52
CIGENEomyV6.53184	CIGENEomyV6.69314	98.67	527	7	0	1	527	527	1	527	527	0	1074	15	21	15-21	50468794	50523705	15q_21p	17958309	17995796	15q_21p	15q_21p	15q_21p	105971.58	1	1
CIGENEomyV6.14598	CIGENEomyV6.27733	89.8	735	61	5	1	724	755	1	732	844	0	1180	4	8	4-8	73525913	73536861	4q_8p	30668080	30680520	4q_8p	4q_8p	4q_8p	105964	0.97	0.86
CIGENEomyV6.23029	CIGENEomyV6.61149	98.33	538	9	0	1	538	538	1	538	538	0	1077	7	18	7-18	1179334	1193037	7p_18p	3575137	3591366	7p_18p	7p_18p	7p_18p	105901.41	1	1
CIGENEomyV6.37073	CIGENEomyV6.51684	81.08	904	140	7	1	899	905	1	878	879	0	1306	11	15	11-15	14455536	14483518	11p_15p	10090877	10096925	11p_15p	11p_15p	11p_15p	105890.48	0.99	1.02
CIGENEomyV6.50321	CIGENEomyV6.78023	91.88	591	46	1	1	591	604	1	589	864	0	1152	14	25	14-25	60678095	60867696	14q_25p	34356449	34523467	14q_25p	14q_25p	14q_25p	105845.76	0.98	0.68
CIGENEomyV6.34325	CIGENEomyV6.41413	88.64	669	43	2	1	669	669	1	636	636	0	1194	10	12	10-12	21507036	21673490	10p_12p	35958893	36079573	10p_12p	10p_12p	10p_12p	105836.16	1	1.05
CIGENEomyV6.20628	CIGENEomyV6.38567	97.27	550	15	0	1	550	558	1	550	551	0	1088	6	11	6-11	28332025	28349195	6p_11q	57468978	57484457	6p_11q	6p_11q	6p_11q	105829.76	0.99	1
CIGENEomyV6.65683	CIGENEomyV6.78726	89.68	678	59	3	1	668	668	1	677	677	0	1180	19	25	19-25	42712563	42824691	19q_25q	55453990	55482007	19q_25q	19q_25q	19q_25q	105822.4	1.01	1
CIGENEomyV6.1777	CIGENEomyV6.6597	89.81	638	38	3	1	635	635	1	614	614	0	1178	1	2	1-2	41612841	41715978	1p_2q	71024801	71113460	1p_2q	1p_2q	1p_2q	105796.18	1	1.03
CIGENEomyV6.74631	CIGENEomyV6.81948	87.29	708	77	3	1	698	700	1	705	707	0	1212	24	27	24-27	3815685	3836944	24_27	5604878	5629373	24_27	24_27	24_27	105795.48	1.01	1
CIGENEomyV6.23697	CIGENEomyV6.61745	96.87	543	15	1	1	543	545	1	541	542	0	1092	7	18	7-18	12084877	12105592	7p_18p	13993845	14024099	7p_18p	7p_18p	7p_18p	105782.04	0.99	1
CIGENEomyV6.35498	CIGENEomyV6.64688	82.9	807	95	6	146	952	952	1	764	764	0	1276	10	19	10-19	49948850	49961620	10q_19p	17352513	17363639	10q_19p	10q_19p	10q_19p	105780.4	0.84	1.05
CIGENEomyV6.21948	CIGENEomyV6.80749	99.04	521	5	0	1	521	521	1	521	521	0	1068	6	26	6-26	63312109	63337821	6q_26	18427193	18452495	6q_26	6q_26	6q_26	105774.72	1	1
CIGENEomyV6.12357	CIGENEomyV6.5679	87.2	867	95	8	15	871	871	15	875	875	0	1213	4	2	2-4	11091808	11112941	2q_4p	46357268	46372319	2q_4p	2q_4p	2q_4p	105773.6	0.99	0.98
CIGENEomyV6.42595	CIGENEomyV6.46131	97.35	565	13	1	27	591	591	16	578	578	0	1086	12	13	12-13	70406107	70424924	12q_13q	41186732	41203814	12q_13q	12q_13q	12q_13q	105722.1	0.95	0.98
CIGENEomyV6.21710	CIGENEomyV6.80523	87.92	687	79	2	1	685	685	29	713	713	0	1201	6	26	6-26	57898195	57902878	6q_26	12816576	12823631	6q_26	6q_26	6q_26	105591.92	1	0.96
CIGENEomyV6.28218	CIGENEomyV6.85206	98.68	531	7	0	1	531	531	1	531	531	0	1070	8	28	8-28	46501593	46565281	8q_28	32402327	32442018	8q_28	8q_28	8q_28	105587.6	1	1
CIGENEomyV6.34769	CIGENEomyV6.40860	96.55	551	17	1	8	556	556	8	558	558	0	1093	10	12	10-12	33784631	33808266	10p_12p	23319645	23340485	10p_12p	10p_12p	10p_12p	105529.15	0.99	0.99
CIGENEomyV6.24670	CIGENEomyV6.59972	90.11	627	60	2	1	626	626	1	626	687	0	1171	7	17	7-17	40709519	40745680	7q_17q	56551974	56590769	7q_17q	7q_17q	7q_17q	105518.81	1	0.91
CIGENEomyV6.50251	CIGENEomyV6.77938	81.02	1064	149	17	1	1029	1034	1	1046	1054	0	1302	14	25	14-25	57957239	57980282	14q_25p	30930012	30992712	14q_25p	14q_25p	14q_25p	105488.04	1.01	0.99
CIGENEomyV6.1514	CIGENEomyV6.6325	99.23	522	4	0	1	522	567	1	522	523	0	1063	1	2	1-2	33885430	33929761	1p_2q	63504673	63563216	1p_2q	1p_2q	1p_2q	105481.49	0.92	1
CIGENEomyV6.54913	CIGENEomyV6.66603	94.3	597	27	2	5	601	660	24	613	618	0	1118	16	20	16-20	20020327	20100218	16p_20p	293395	350202	16p_20p	16p_20p	16p_20p	105427.4	0.9	0.96
CIGENEomyV6.1622	CIGENEomyV6.6470	96.85	540	15	1	261	800	800	1	538	538	0	1088	1	2	1-2	37903471	37933451	1p_2q	67323127	67347600	1p_2q	1p_2q	1p_2q	105372.8	0.67	1
CIGENEomyV6.11005	CIGENEomyV6.71598	87.57	692	83	2	1	691	693	1	690	694	0	1203	3	22	3-22	73682911	73714349	3q_22q	22681615	22704686	3q_22q	3q_22q	3q_22q	105346.71	1	0.99
CIGENEomyV6.29365	CIGENEomyV6.84203	84.95	744	94	2	1	743	758	304	1030	1098	0	1240	8	28	8-28	72296374	72314791	8q_28	8146471	8165071	8q_28	8q_28	8q_28	105338	0.98	0.68
CIGENEomyV6.21663	CIGENEomyV6.80422	89.48	656	54	4	181	826	826	21	671	671	0	1177	6	26	6-26	55923176	55965051	6q_26	10089281	10130853	6q_26	6q_26	6q_26	105317.96	0.79	0.97
CIGENEomyV6.12863	CIGENEomyV6.18217	97.06	545	16	0	1	545	545	121	665	665	0	1085	4	5	4-5	24458600	24473346	4p_5q	69719480	69761399	4p_5q	4p_5q	4p_5q	105310.1	1	0.82
CIGENEomyV6.23752	CIGENEomyV6.61782	99.8	508	1	0	1	508	508	1	508	508	0	1055	7	18	7-18	13736060	13769901	7p_18p	15557730	15588878	7p_18p	7p_18p	7p_18p	105289	1	1
CIGENEomyV6.15879	CIGENEomyV6.85756	90.84	699	47	6	1	687	687	279	972	972	0	1159	5	29	5-29	12503756	12587057	5p_29	861391	953789	5p_29	5p_29	5p_29	105283.56	1.01	0.71
CIGENEomyV6.14549	CIGENEomyV6.27770	91.61	608	35	2	360	958	958	1	601	601	0	1149	4	8	4-8	72309019	72645244	4q_8p	31692663	31843611	4q_8p	4q_8p	4q_8p	105259.89	0.63	1.01
CIGENEomyV6.36770	CIGENEomyV6.52037	87.92	679	68	6	1	676	676	8	675	675	0	1197	11	15	11-15	8451342	8488543	11p_15p	15876247	15927467	11p_15p	11p_15p	11p_15p	105240.24	1	1
CIGENEomyV6.31189	CIGENEomyV6.70341	98.46	519	8	0	3	521	521	1	519	519	0	1068	9	21	9-21	17640352	17740086	9p_21q	41340266	41484229	9p_21q	9p_21q	9p_21q	105155.28	1	1
CIGENEomyV6.13807	CIGENEomyV6.27033	96.72	549	18	0	1	549	549	364	912	912	0	1087	4	8	4-8	53943083	53961448	4q_8p	12048138	12106241	4q_8p	4q_8p	4q_8p	105134.64	1	0.6
CIGENEomyV6.75060	CIGENEomyV6.82424	95.12	574	24	3	28	600	600	1	571	571	0	1105	24	27	24-27	13056155	13071083	24_27	16079879	16099971	24_27	24_27	24_27	105107.6	0.95	1
CIGENEomyV6.34204	CIGENEomyV6.41526	99.61	517	2	0	1	517	517	145	661	661	0	1055	10	12	10-12	16351266	16392133	10p_12p	41572953	41736883	10p_12p	10p_12p	10p_12p	105088.55	1	0.78
CIGENEomyV6.42837	CIGENEomyV6.46134	86.06	746	44	3	1	735	751	1	697	805	0	1221	12	13	12-13	74368743	74378102	12q_13q	41305989	41317760	12q_13q	12q_13q	12q_13q	105079.26	0.99	0.92
CIGENEomyV6.20002	CIGENEomyV6.37935	93.56	590	36	2	6	594	595	11	599	601	0	1123	6	11	6-11	14353578	14372622	6p_11q	43037279	43073378	6p_11q	6p_11q	6p_11q	105067.88	0.99	0.98
CIGENEomyV6.49036	CIGENEomyV6.62397	87.18	858	87	9	88	933	933	1	847	847	0	1205	14	18	14-18	29999812	30020054	14p_18q	31754527	31771562	14p_18q	14p_18q	14p_18q	105051.9	0.91	1
CIGENEomyV6.42402	CIGENEomyV6.45701	92.69	670	34	4	1	655	655	70	739	739	0	1133	12	13	12-13	66099514	66126905	12q_13q	33234751	33263023	12q_13q	12q_13q	12q_13q	105017.77	1.02	0.9
CIGENEomyV6.23060	CIGENEomyV6.61194	99.4	504	3	0	1	504	555	379	882	912	0	1056	7	18	7-18	1621264	1634287	7p_18p	4663078	4694205	7p_18p	7p_18p	7p_18p	104966.4	0.91	0.55
CIGENEomyV6.65147	CIGENEomyV6.79262	95.98	547	22	0	1	547	547	1	547	547	0	1093	19	25	19-25	30445289	30471652	19q_25q	68105192	68151259	19q_25q	19q_25q	19q_25q	104906.14	1	1
CIGENEomyV6.17717	CIGENEomyV6.742	94.13	579	34	0	20	598	598	1	579	579	0	1114	5	1	1-5	56910356	56930974	1p_5q	15735719	15751532	1p_5q	1p_5q	1p_5q	104860.82	0.97	1
CIGENEomyV6.16251	CIGENEomyV6.86288	93.79	596	37	0	1	596	596	1	596	596	0	1118	5	29	5-29	20719779	20751857	5p_29	13141062	13157361	5p_29	5p_29	5p_29	104857.22	1	1
CIGENEomyV6.24384	CIGENEomyV6.60317	92.51	614	46	0	1	614	614	1	614	614	0	1133	7	17	7-17	32193460	32213348	7q_17q	65664266	65678767	7q_17q	7q_17q	7q_17q	104813.83	1	1
CIGENEomyV6.53045	CIGENEomyV6.69445	93.31	643	42	1	1	642	642	1	643	643	0	1123	15	21	15-21	47567551	47578077	15q_21p	20848335	20857857	15q_21p	15q_21p	15q_21p	104787.13	1	1
CIGENEomyV6.34950	CIGENEomyV6.86748	99.22	513	4	0	1	513	513	1	513	513	0	1056	10	29	10-29	38948255	39014730	10p_29	27420553	27470840	10p_29	10p_29	10p_29	104776.32	1	1
CIGENEomyV6.20187	CIGENEomyV6.38142	92.15	599	46	1	1	599	599	28	625	625	0	1137	6	11	6-11	17943720	17998823	6p_11q	47018421	47052852	6p_11q	6p_11q	6p_11q	104774.55	1	0.96
CIGENEomyV6.48882	CIGENEomyV6.62581	97.23	541	15	0	23	563	563	1	541	541	0	1077	14	18	14-18	26769698	26793195	14p_18q	35060302	35069789	14p_18q	14p_18q	14p_18q	104716.71	0.96	1
CIGENEomyV6.65326	CIGENEomyV6.79065	92.32	612	47	0	1	612	612	1	612	612	0	1134	19	25	19-25	35515372	35558837	19q_25q	62753722	62793001	19q_25q	19q_25q	19q_25q	104690.88	1	1
CIGENEomyV6.65399	CIGENEomyV6.79014	83.88	769	99	8	5	767	767	32	781	781	0	1248	19	25	19-25	36868140	36888150	19q_25q	61517099	61549628	19q_25q	19q_25q	19q_25q	104682.24	0.99	0.97
CIGENEomyV6.42598	CIGENEomyV6.46128	97.69	605	14	0	19	623	623	120	724	724	0	1071	12	13	12-13	70448624	70455388	12q_13q	41158432	41167661	12q_13q	12q_13q	12q_13q	104625.99	0.97	0.84
CIGENEomyV6.34732	CIGENEomyV6.40912	93.16	570	35	1	1	566	570	1	570	571	0	1123	10	12	10-12	32654843	32673118	10p_12p	24489335	24497090	10p_12p	10p_12p	10p_12p	104618.68	1	1
CIGENEomyV6.28846	CIGENEomyV6.84643	91.61	620	50	2	11	629	629	194	812	812	0	1142	8	28	8-28	61107304	61111822	8q_28	19226053	19250712	8q_28	8q_28	8q_28	104618.62	0.98	0.76
CIGENEomyV6.12414	CIGENEomyV6.5733	91.05	659	55	4	12	669	669	70	725	725	0	1149	4	2	2-4	12517408	12529287	2q_4p	47725696	47737880	2q_4p	2q_4p	2q_4p	104616.45	0.98	0.9
CIGENEomyV6.20612	CIGENEomyV6.38546	91.57	605	46	1	1	600	609	1	605	612	0	1142	6	11	6-11	27828944	27892567	6p_11q	56922375	56976028	6p_11q	6p_11q	6p_11q	104572.94	0.99	0.99
CIGENEomyV6.48179	CIGENEomyV6.63214	95.83	552	22	1	1	552	598	1	551	568	0	1091	14	18	14-18	10843550	10873593	14p_18q	49844103	49873784	14p_18q	14p_18q	14p_18q	104550.53	0.92	0.97
CIGENEomyV6.45174	CIGENEomyV6.58444	89.57	805	51	10	1	780	780	1	797	797	0	1167	13	17	13-17	21983492	21998100	13p_17p	17772511	17784937	13p_17p	13p_17p	13p_17p	104528.19	1.02	1
CIGENEomyV6.21820	CIGENEomyV6.80617	99.8	504	1	0	1	504	526	1	504	643	0	1047	6	26	6-26	60350279	60368918	6q_26	15226238	15245422	6q_26	6q_26	6q_26	104490.6	0.96	0.78
CIGENEomyV6.1642	CIGENEomyV6.6486	89.04	666	63	3	1	657	657	1	665	665	0	1173	1	2	1-2	38351393	38392661	1p_2q	67668468	67685495	1p_2q	1p_2q	1p_2q	104443.92	1.01	1
CIGENEomyV6.25339	CIGENEomyV6.59245	90.89	615	56	0	1	615	646	26	640	644	0	1149	7	17	7-17	58750202	58770340	7q_17q	38649813	38774482	7q_17q	7q_17q	7q_17q	104432.61	0.95	0.95
CIGENEomyV6.44922	CIGENEomyV6.58155	97.49	558	14	0	129	686	686	28	585	585	0	1071	13	17	13-17	16956486	17038713	13p_17p	12847804	12883653	13p_17p	13p_17p	13p_17p	104411.79	0.81	0.95
CIGENEomyV6.74735	CIGENEomyV6.82104	91.31	633	46	2	1	633	633	1	624	624	0	1143	24	27	24-27	6363432	6371976	24_27	9070976	9079091	24_27	24_27	24_27	104367.33	1	1.01
CIGENEomyV6.48321	CIGENEomyV6.63350	98.45	517	8	0	1	517	573	326	842	863	0	1060	14	18	14-18	13833064	13971070	14p_18q	52678237	53042915	14p_18q	14p_18q	14p_18q	104357	0.9	0.6
CIGENEomyV6.67544	CIGENEomyV6.74143	88.87	701	72	3	279	979	979	1	695	695	0	1174	20	23	20-23	21676935	21719138	20q_23	39862832	39900336	20q_23	20q_23	20q_23	104333.38	0.71	1
CIGENEomyV6.14482	CIGENEomyV6.27832	88.77	668	73	2	1	667	667	1	667	667	0	1175	4	8	4-8	70769858	70782200	4q_8p	33279927	33297650	4q_8p	4q_8p	4q_8p	104304.75	1	1
CIGENEomyV6.25512	CIGENEomyV6.59101	89.91	704	67	2	24	723	723	1	704	704	0	1160	7	17	7-17	62569778	62595692	7q_17q	34908457	34918565	7q_17q	7q_17q	7q_17q	104295.6	0.97	1
CIGENEomyV6.74600	CIGENEomyV6.81913	99.21	504	4	0	24	527	527	88	591	591	0	1051	24	27	24-27	2730437	2757964	24_27	4531455	4549907	24_27	24_27	24_27	104269.71	0.96	0.85
CIGENEomyV6.24532	CIGENEomyV6.60146	93.06	591	41	0	16	606	606	442	1032	1032	0	1120	7	17	7-17	36810072	36829633	7q_17q	60964098	61044066	7q_17q	7q_17q	7q_17q	104227.2	0.98	0.57
CIGENEomyV6.31784	CIGENEomyV6.56209	91.73	629	48	2	152	778	778	1	627	627	0	1136	9	16	9-16	33925337	33955707	9q_16q	51117988	51145321	9q_16q	9q_16q	9q_16q	104205.28	0.81	1
CIGENEomyV6.34512	CIGENEomyV6.41198	85.13	780	83	5	23	799	816	1	750	941	0	1224	10	12	10-12	26357578	26528903	10p_12p	30592900	30720045	10p_12p	10p_12p	10p_12p	104199.12	0.95	0.82
CIGENEomyV6.16996	CIGENEomyV6.40390	93.62	580	22	2	1	572	572	16	588	588	0	1113	5	12	5-12	38776105	38792353	5p_12p	12891772	12912983	5p_12p	5p_12p	5p_12p	104199.06	1.01	0.98
CIGENEomyV6.50111	CIGENEomyV6.77831	88.75	738	77	4	1	735	735	1	735	735	0	1174	14	25	14-25	55293421	55320167	14q_25p	28172475	28184713	14q_25p	14q_25p	14q_25p	104192.5	1	1
CIGENEomyV6.29424	CIGENEomyV6.84014	89.89	643	53	3	1	631	631	23	665	665	0	1159	8	28	8-28	73157192	73184285	8q_28	3655050	3679568	8q_28	8q_28	8q_28	104182.51	1.01	0.96
CIGENEomyV6.12674	CIGENEomyV6.18017	94.52	566	23	1	1	566	566	1	558	558	0	1102	4	5	4-5	18791574	18868422	4p_5q	64193895	64238700	4p_5q	4p_5q	4p_5q	104161.04	1	1.01
CIGENEomyV6.44807	CIGENEomyV6.58024	95.56	698	28	2	48	744	945	1	696	709	0	1090	13	17	13-17	13675657	13701087	13p_17p	9432745	9451445	13p_17p	13p_17p	13p_17p	104160.4	0.74	0.98
CIGENEomyV6.36853	CIGENEomyV6.51952	91.67	600	47	2	1	600	600	1	597	597	0	1136	11	15	11-15	10558715	10609995	11p_15p	14068634	14126050	11p_15p	11p_15p	11p_15p	104137.12	1	1
CIGENEomyV6.2626	CIGENEomyV6.73130	100	503	0	0	1	503	503	1	503	503	0	1041	1	23	1-23	65206960	65251758	1q_23	9734769	9801222	1q_23	1q_23	1q_23	104100	1	1
CIGENEomyV6.42263	CIGENEomyV6.45582	99.22	515	4	0	1	515	515	1	515	515	0	1049	12	13	12-13	63503793	63514570	12q_13q	30672785	30872397	12q_13q	12q_13q	12q_13q	104081.78	1	1
CIGENEomyV6.65066	CIGENEomyV6.79356	88.73	648	57	4	35	666	669	6	653	656	0	1173	19	25	19-25	28284545	28361738	19q_25q	70388392	70428300	19q_25q	19q_25q	19q_25q	104080.29	0.96	0.98
CIGENEomyV6.31885	CIGENEomyV6.56143	90.85	601	51	2	1	597	599	1	601	603	0	1145	9	16	9-16	35746949	35785927	9q_16q	49492234	49528173	9q_16q	9q_16q	9q_16q	104023.25	1	0.99
CIGENEomyV6.54776	CIGENEomyV6.66738	95.68	556	24	0	1	556	556	1	556	556	0	1087	16	20	16-20	16815175	16863664	16p_20p	3999605	4096973	16p_20p	16p_20p	16p_20p	104004.16	1	1
CIGENEomyV6.10641	CIGENEomyV6.71852	80.3	1015	160	15	1	1001	1001	1	989	989	0	1295	3	22	3-22	66684130	66753275	3q_22q	28771678	28858536	3q_22q	3q_22q	3q_22q	103988.5	1	1.01
CIGENEomyV6.16563	CIGENEomyV6.86557	89.72	681	59	3	1	670	806	1	681	802	0	1159	5	29	5-29	29369042	29402387	5p_29	22500438	22531141	5p_29	5p_29	5p_29	103985.48	0.84	0.85
CIGENEomyV6.22208	CIGENEomyV6.80992	99.4	503	3	0	1	503	503	1	503	503	0	1046	6	26	6-26	68853623	68956470	6q_26	23718647	23821582	6q_26	6q_26	6q_26	103972.4	1	1
CIGENEomyV6.32318	CIGENEomyV6.56009	96.8	562	18	0	1	562	562	1	562	562	0	1074	9	16	9-16	48086561	48132335	9q_16q	46437356	46478404	9q_16q	9q_16q	9q_16q	103963.2	1	1
CIGENEomyV6.20330	CIGENEomyV6.38269	89.22	705	61	5	77	773	773	1	698	698	0	1165	6	11	6-11	20591641	20601225	6p_11q	49553356	49561797	6p_11q	6p_11q	6p_11q	103941.3	0.91	1
CIGENEomyV6.34667	CIGENEomyV6.41007	85.39	965	100	10	90	1046	1046	1	932	932	0	1217	10	12	10-12	31236781	31276880	10p_12p	26027880	26037366	10p_12p	10p_12p	10p_12p	103919.63	0.91	1.02
CIGENEomyV6.37471	CIGENEomyV6.52532	93.36	602	40	0	1	602	621	195	796	813	0	1113	11	15	11-15	26459009	26552792	11p_15p	31172928	31370983	11p_15p	11p_15p	11p_15p	103909.68	0.97	0.74
CIGENEomyV6.48845	CIGENEomyV6.62622	84.81	724	99	2	33	745	746	7	730	747	0	1225	14	18	14-18	26103582	26122300	14p_18q	35765619	35778881	14p_18q	14p_18q	14p_18q	103892.25	0.97	0.97
CIGENEomyV6.75287	CIGENEomyV6.82653	95.38	584	15	1	1	584	584	14	585	585	0	1089	24	27	24-27	17991469	18004102	24_27	21287265	21299272	24_27	24_27	24_27	103868.82	1	1
CIGENEomyV6.37085	CIGENEomyV6.51672	90	640	61	1	1	637	637	1	640	640	0	1154	11	15	11-15	14682459	14694693	11p_15p	9903394	9910362	11p_15p	11p_15p	11p_15p	103860	1	1
CIGENEomyV6.1745	CIGENEomyV6.6568	91.07	605	50	2	35	638	653	8	609	612	0	1140	1	2	1-2	40890439	40927537	1p_2q	70173356	70188255	1p_2q	1p_2q	1p_2q	103819.8	0.92	0.99
CIGENEomyV6.53456	CIGENEomyV6.69012	97.74	532	12	0	12	543	808	316	847	862	0	1062	15	21	15-21	55184680	55232656	15q_21p	12811079	12849983	15q_21p	15q_21p	15q_21p	103799.88	0.66	0.62
CIGENEomyV6.53352	CIGENEomyV6.69145	91.45	608	52	0	1	608	608	1	608	608	0	1135	15	21	15-21	53067944	53094620	15q_21p	15007208	15063719	15q_21p	15q_21p	15q_21p	103795.75	1	1
CIGENEomyV6.22200	CIGENEomyV6.80979	99.03	513	5	0	52	564	564	1	513	513	0	1048	6	26	6-26	68371786	68456133	6q_26	23227508	23278266	6q_26	6q_26	6q_26	103783.44	0.91	1
CIGENEomyV6.1652	CIGENEomyV6.6489	84.09	811	69	6	1	757	757	1	805	805	0	1234	1	2	1-2	38446630	38485197	1p_2q	67724611	67767964	1p_2q	1p_2q	1p_2q	103767.06	1.06	1
CIGENEomyV6.22232	CIGENEomyV6.81019	97.51	523	13	0	1	523	523	1	523	523	0	1064	6	26	6-26	69562274	69566322	6q_26	24461314	24465314	6q_26	6q_26	6q_26	103750.64	1	1
CIGENEomyV6.42367	CIGENEomyV6.45661	98.63	511	7	0	1	511	511	1	511	511	0	1051	12	13	12-13	65379562	65411845	12q_13q	32523153	32576524	12q_13q	12q_13q	12q_13q	103660.13	1	1
CIGENEomyV6.37710	CIGENEomyV6.52326	97.64	550	10	1	13	562	562	1	547	547	0	1061	11	15	11-15	34537472	34638832	11p_15p	23585537	23604332	11p_15p	11p_15p	11p_15p	103596.04	0.98	1
CIGENEomyV6.14464	CIGENEomyV6.27852	84.86	733	60	4	14	699	727	1	729	746	0	1220	4	8	4-8	70015006	70022837	4q_8p	34066919	34073778	4q_8p	4q_8p	4q_8p	103529.2	1	0.98
CIGENEomyV6.48987	CIGENEomyV6.62438	90.57	636	57	1	1	633	634	1	636	689	0	1143	14	18	14-18	29163528	29244057	14p_18q	32485451	32613531	14p_18q	14p_18q	14p_18q	103521.51	1	0.92
CIGENEomyV6.23658	CIGENEomyV6.61707	99.81	518	1	0	1	518	518	1	518	518	0	1037	7	18	7-18	11438190	11451915	7p_18p	13295332	13301323	7p_18p	7p_18p	7p_18p	103502.97	1	1
CIGENEomyV6.65148	CIGENEomyV6.79261	93.76	577	33	1	1	574	574	1	577	577	0	1103	19	25	19-25	30474213	30519119	19q_25q	68089056	68102600	19q_25q	19q_25q	19q_25q	103417.28	1	1
[truncated: 5,980 more rows]
